# Supplementary material
Source: PubMed Central journal article supplement (PMC5963540)
Supplement: NIHMS965693-supplement-SI-1.pdf [file NIHMS965693-supplement-SI-1.pdf]

# Supporting Information

## Divergent Stereoselectivity in Phosphothreonine (pThr)-Catalyzed Reductive Aminations of 3-Amidocyclohexanones

Christopher R. Shugrue, Aaron L. Featherston, Rachel M. Lackner, Angela Lin, and Scott J. Miller\*

Department of Chemistry, Yale University, New Haven, Connecticut 06520-8107, United States

\*E-mail: [scott.miller@yale.edu](mailto:scott.miller@yale.edu)

### Table of Contents

|                                                                                  |             |
|----------------------------------------------------------------------------------|-------------|
| <b>1. General Information.....</b>                                               | <b>S2</b>   |
| <b>2. Synthesis of pThr-Embedded Peptides.....</b>                               | <b>S3</b>   |
| <b>3. Characterization of 3-Amidocyclohexanones.....</b>                         | <b>S23</b>  |
| <b>4. Purification and Characterization of Racemic Reductive Aminations.....</b> | <b>S28</b>  |
| <b>5. HPLC Traces.....</b>                                                       | <b>S50</b>  |
| <b>6. RRF Measurements by LC/MS.....</b>                                         | <b>S53</b>  |
| <b>7. Crystallographic Data.....</b>                                             | <b>S55</b>  |
| <b>8. Computational Data.....</b>                                                | <b>S98</b>  |
| <b>9. References.....</b>                                                        | <b>S139</b> |

## 1. General Information

### Example Automatic Chromatography Trace

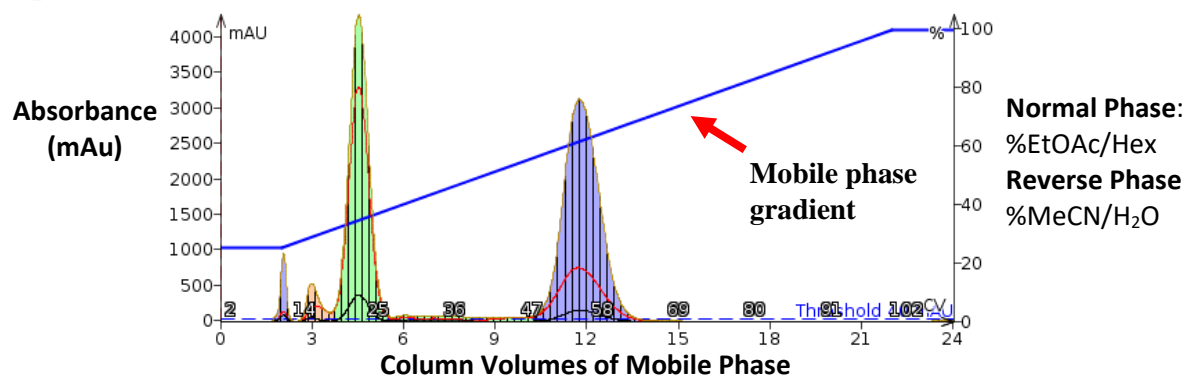

### Abbreviations:

|                                 |                                                                                                                                                                                                                                             |
|---------------------------------|---------------------------------------------------------------------------------------------------------------------------------------------------------------------------------------------------------------------------------------------|
| AcOH                            | Acetic Acid                                                                                                                                                                                                                                 |
| Acpc                            | 1-Aminocyclopropane-1-carboxylic acid                                                                                                                                                                                                       |
| Bz                              | Benzoyl                                                                                                                                                                                                                                     |
| C <sub>6</sub> H <sub>6</sub>   | Benzene                                                                                                                                                                                                                                     |
| CaSO <sub>4</sub>               | Calcium Sulfate                                                                                                                                                                                                                             |
| Cbz                             | Carboxybenzyl                                                                                                                                                                                                                               |
| Cha                             | L-Cyclohexylalanine                                                                                                                                                                                                                         |
| Chg                             | Cyclohexylglycine                                                                                                                                                                                                                           |
| CH <sub>2</sub> Cl <sub>2</sub> | Methylene Chloride                                                                                                                                                                                                                          |
| CHCl <sub>3</sub>               | Chloroform                                                                                                                                                                                                                                  |
| Chg                             | L-Cyclohexylglycine                                                                                                                                                                                                                         |
| Cl-HOBt                         | 6-Chloro-1-hydroxybenzotriazole                                                                                                                                                                                                             |
| Dbz                             | Dibenzylideneacetone                                                                                                                                                                                                                        |
| DFT                             | Density Functional Theory                                                                                                                                                                                                                   |
| DPP                             | Diphenyl Phosphate                                                                                                                                                                                                                          |
| DMF                             | <i>N,N</i> -dimethylformamide                                                                                                                                                                                                               |
| EDC                             | <i>N</i> -(3-Dimethylaminopropyl)- <i>N'</i> -ethylcarbodiimide                                                                                                                                                                             |
| EtOAc                           | Ethyl Acetate                                                                                                                                                                                                                               |
| Fmoc                            | Fluorenylmethyloxycarbonyl                                                                                                                                                                                                                  |
| HATU                            | 1-[Bis(dimethylamino)methylene]-1H-1,2,3-triazolo[4,5-b]pyridinium 3-oxid hexafluorophosphate, <i>N</i> -[(Dimethylamino)-1H-1,2,3-triazolo-4,5-b]pyridin-1-ylmethylene]- <i>N</i> -methylmethanaminium hexafluorophosphate <i>N</i> -oxide |
| HCTU                            | <i>O</i> -(1H-6-Chlorobenzotriazole-1-yl)-1,1,3,3-tetramethyluronium hexafluorophosphate                                                                                                                                                    |
| Hex                             | Hexanes                                                                                                                                                                                                                                     |
| HOBt                            | 1-Hydroxybenzotriazole                                                                                                                                                                                                                      |
| HPLC                            | High-performance liquid chromatography                                                                                                                                                                                                      |
| MeCN                            | Acetonitrile                                                                                                                                                                                                                                |
| MeOH                            | Methanol                                                                                                                                                                                                                                    |
| MS                              | Mass Spectrometry                                                                                                                                                                                                                           |
| NMM                             | <i>N</i> -Methylmorpholine                                                                                                                                                                                                                  |
| NMP                             | <i>N</i> -Methyl-2-pyrrolidone                                                                                                                                                                                                              |
| Phg                             | L-Phenylglycine                                                                                                                                                                                                                             |
| PhH                             | Benzene                                                                                                                                                                                                                                     |
| PhMe                            | Toluene                                                                                                                                                                                                                                     |
| <i>p</i> -MeO-Bz                | <i>para</i> -methoxy benzoyl                                                                                                                                                                                                                |
| <i>p</i> -O <sub>2</sub> N-Bz   | <i>para</i> -nitro benzoyl                                                                                                                                                                                                                  |

|         |                                                                    |
|---------|--------------------------------------------------------------------|
| RF      | Retention factor                                                   |
| RRF     | Relative response factor                                           |
| rt      | Room temperature                                                   |
| THF     | Tetrahydrofuran                                                    |
| TMS     | Trimethylsilyl                                                     |
| TFA     | Trifluoroacetic acid                                               |
| Tle     | <i>L-tert-Leucine</i>                                              |
| UPLC-MS | Ultra-performance liquid chromatography – tandem mass spectrometry |

## 2. Synthesis of pThr-Embedded Peptides

**Scheme S1: Representative Synthesis and Characterization of Peptide P12 (General Procedure #1)**

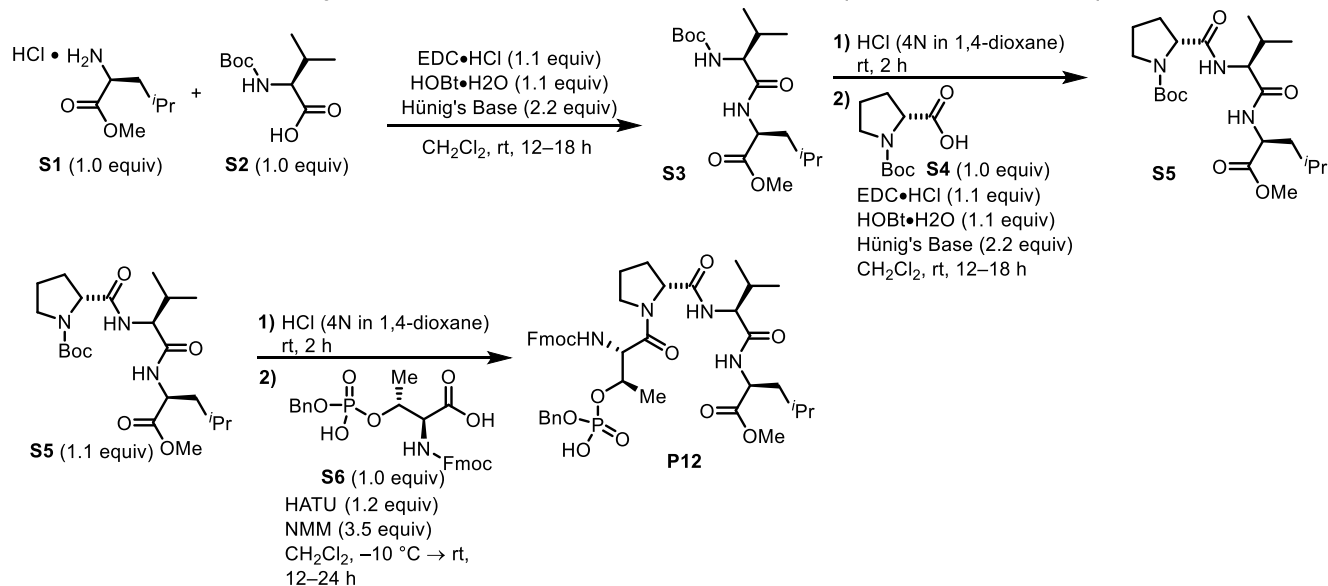

**Scheme S2: Representative Synthesis of Peptide P26 (General Procedure #2)**

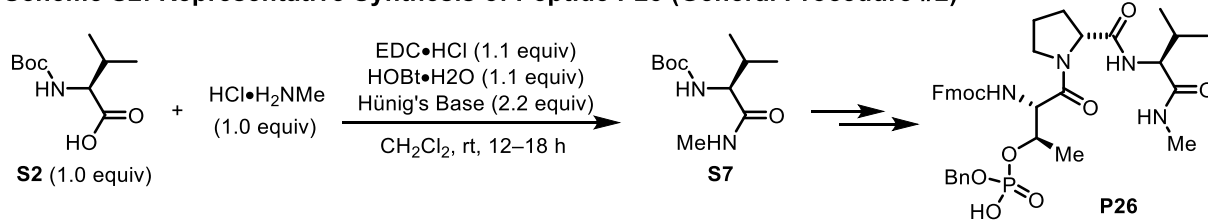

**Scheme S3: Synthesis of Peptide P30 (Procedure #3)**

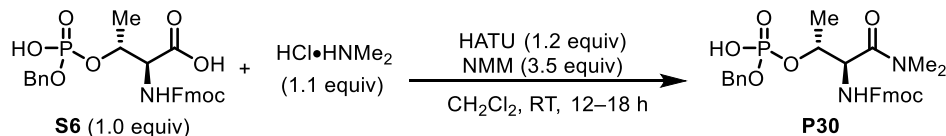

**Scheme S4: Representative Synthesis and Characterization S13, a Precursor to Peptide P32 (General Procedure #4)**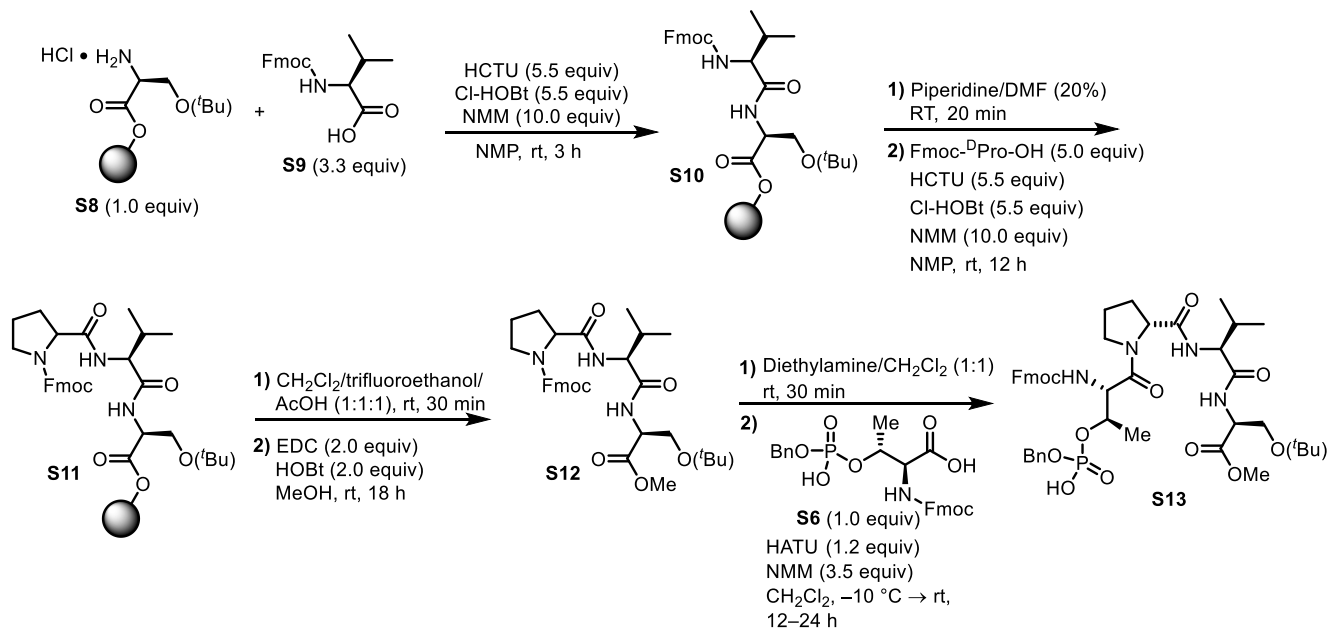**Scheme S5: Variation of N-Terminal Protecting Group****(A) General Procedure #5**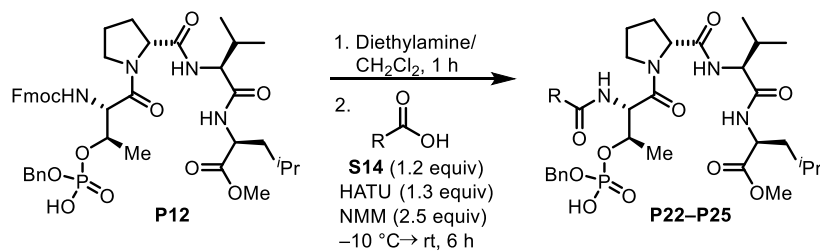**(B) Procedure #6**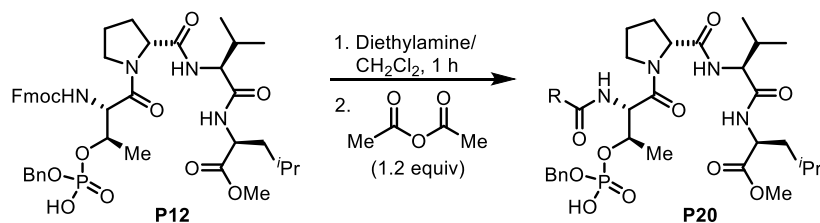**Scheme S6: Synthesis of *trans*-4-Amidoproline Residue (Procedure #7)**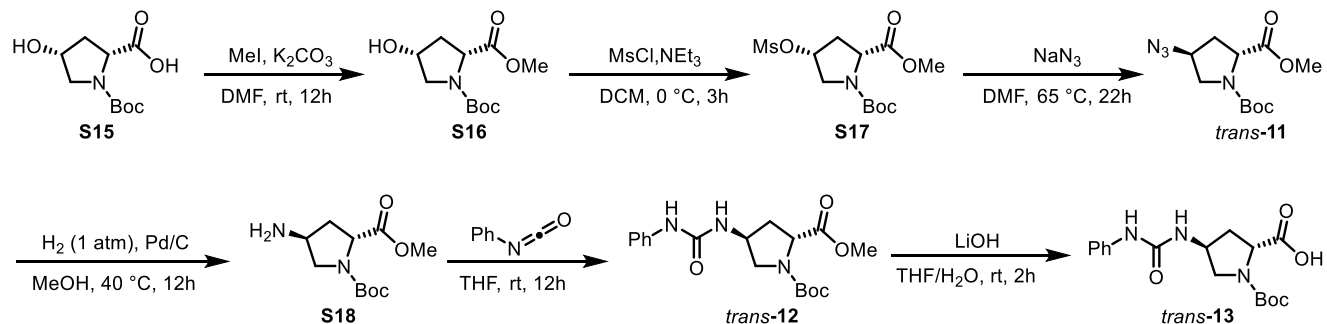

**1-(*tert*-butyl) 2-methyl (2*R*,4*S*)-4-(3-phenylureido)pyrrolidine-1,2-dicarboxylate (*trans*-12).**  
Automatic Chromatography Traces:

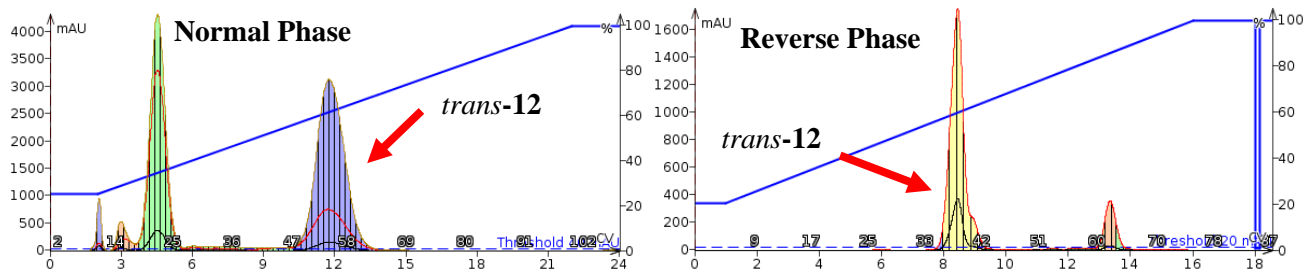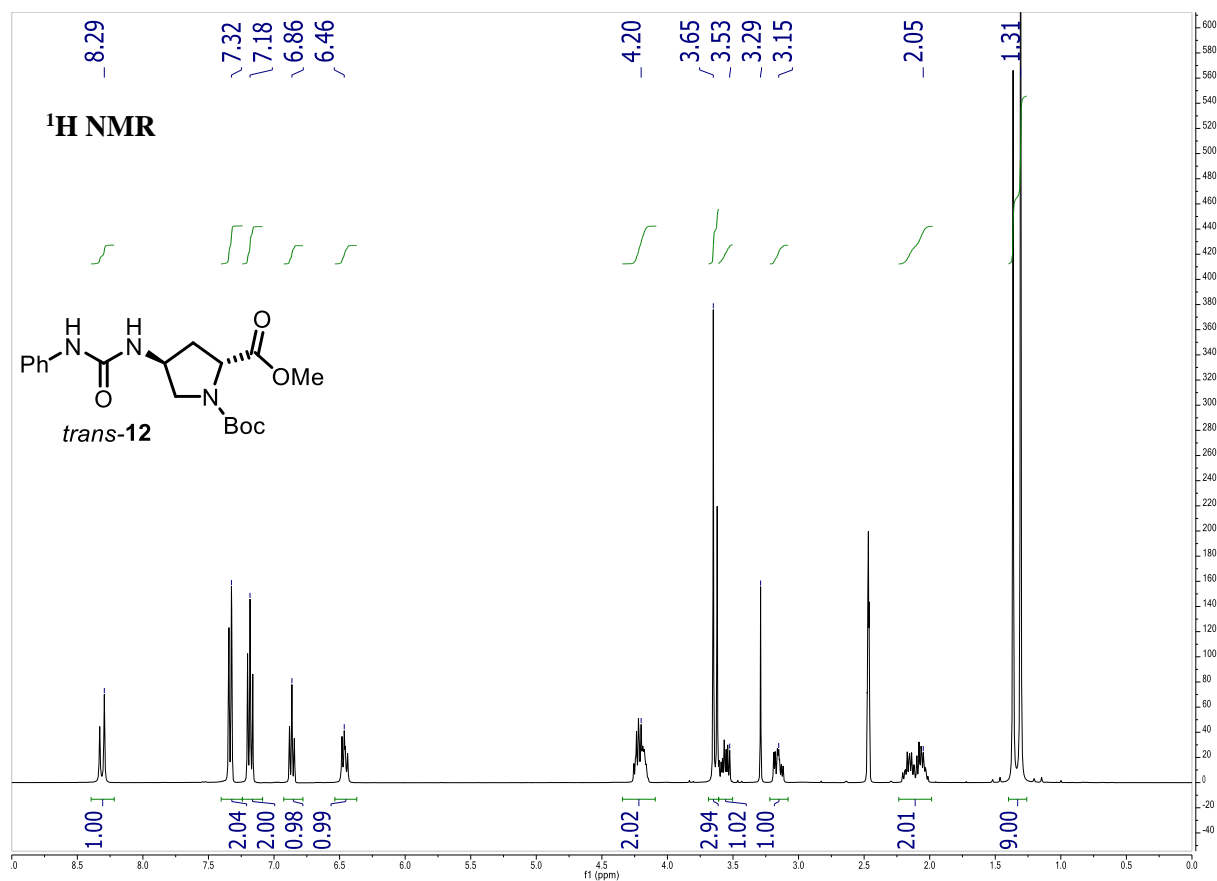

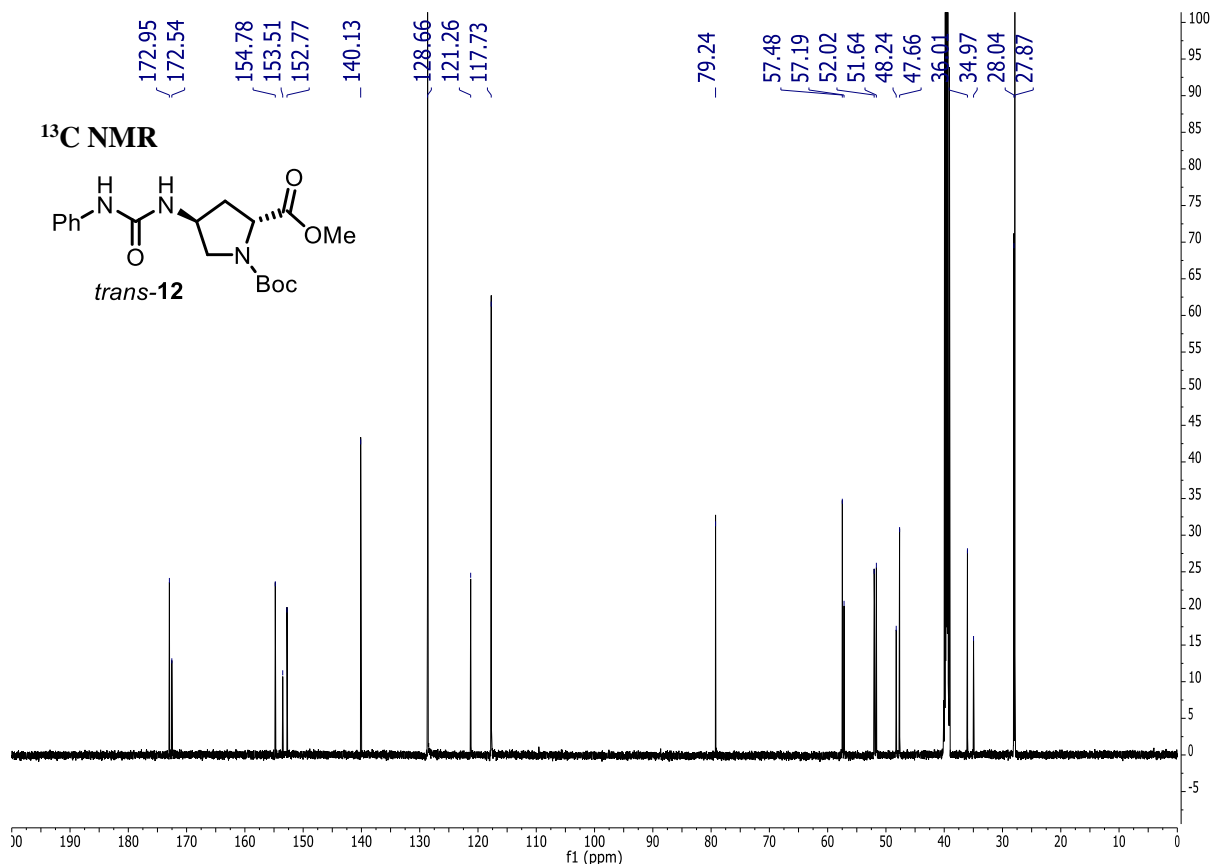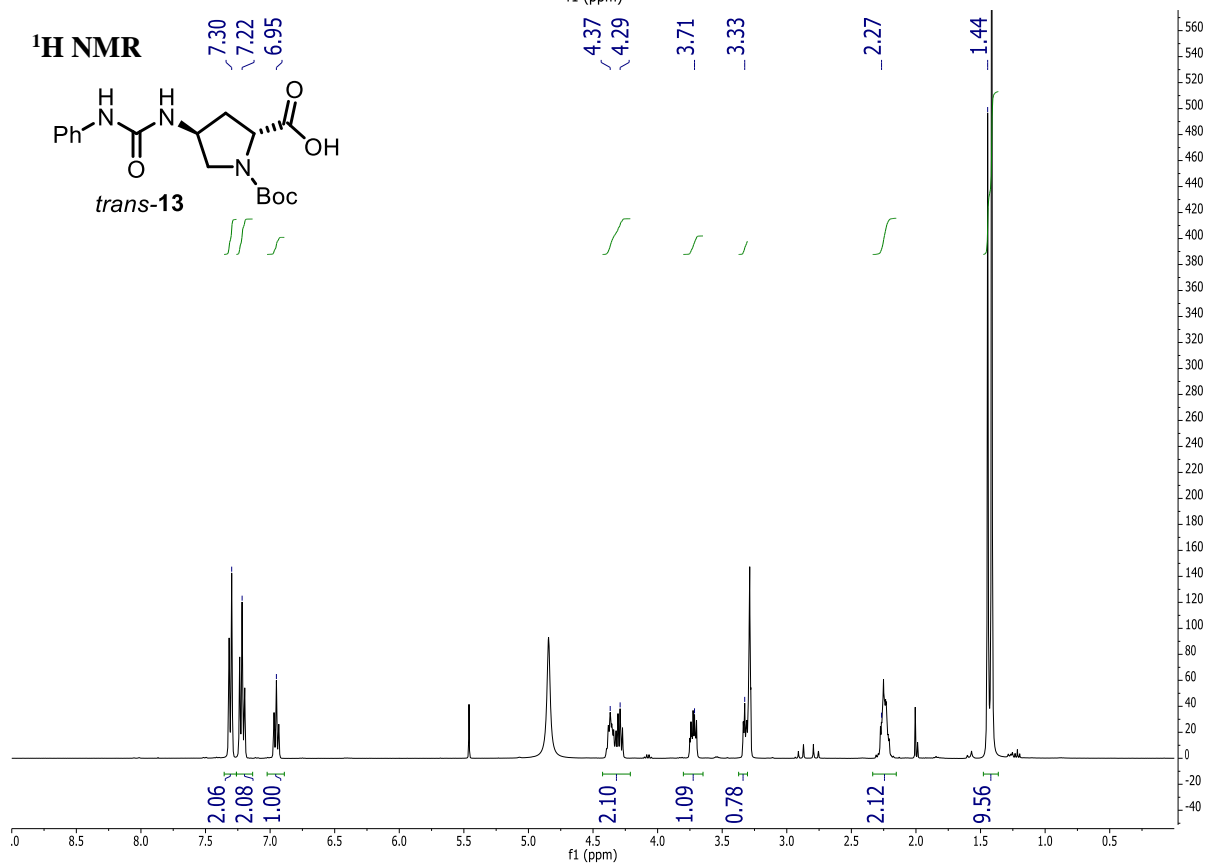

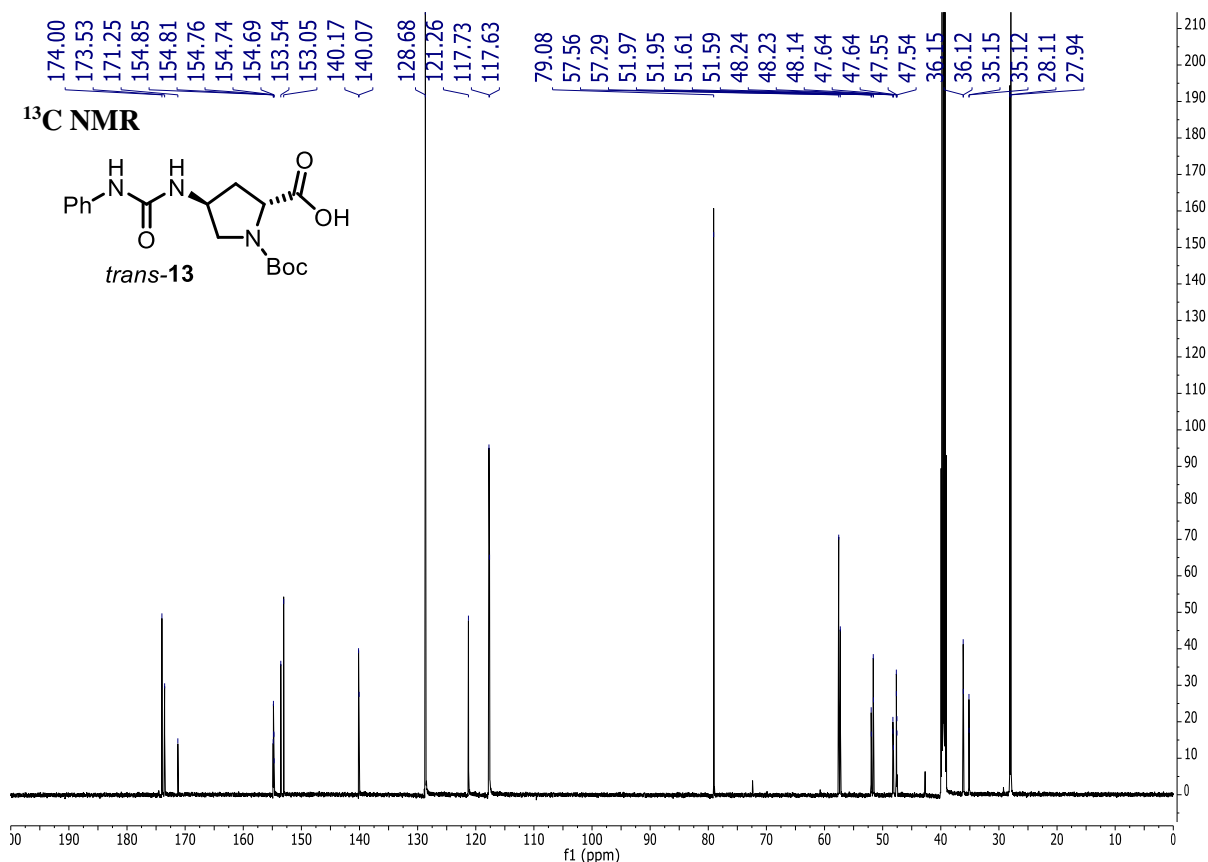

**Scheme S7: Synthesis of *cis*-4-Amidoproline Residue (Procedure #8)**

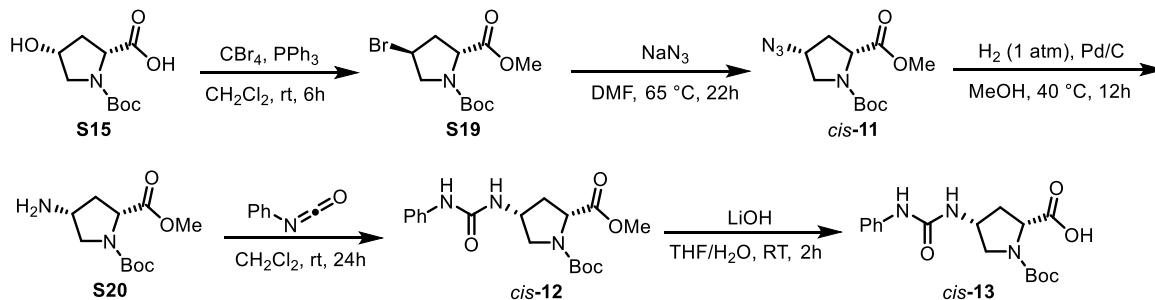

**1-(*tert*-butyl) 2-methyl (2*R*,4*R*)-4-(3-phenylureido)pyrrolidine-1,2-dicarboxylate (*cis*-12).**

Automatic Chromatography Traces:

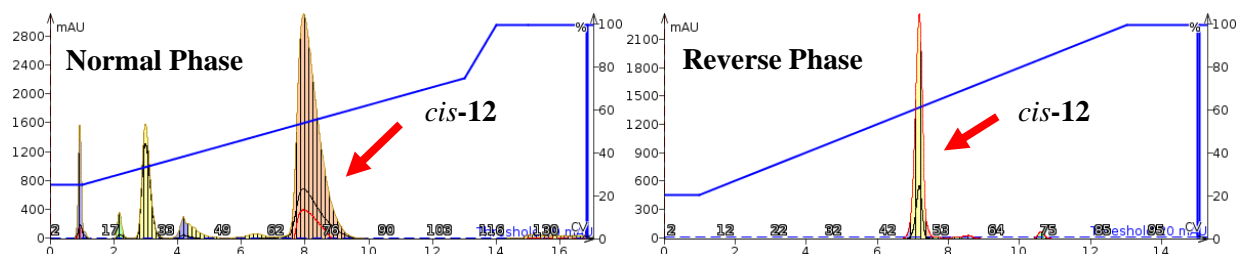

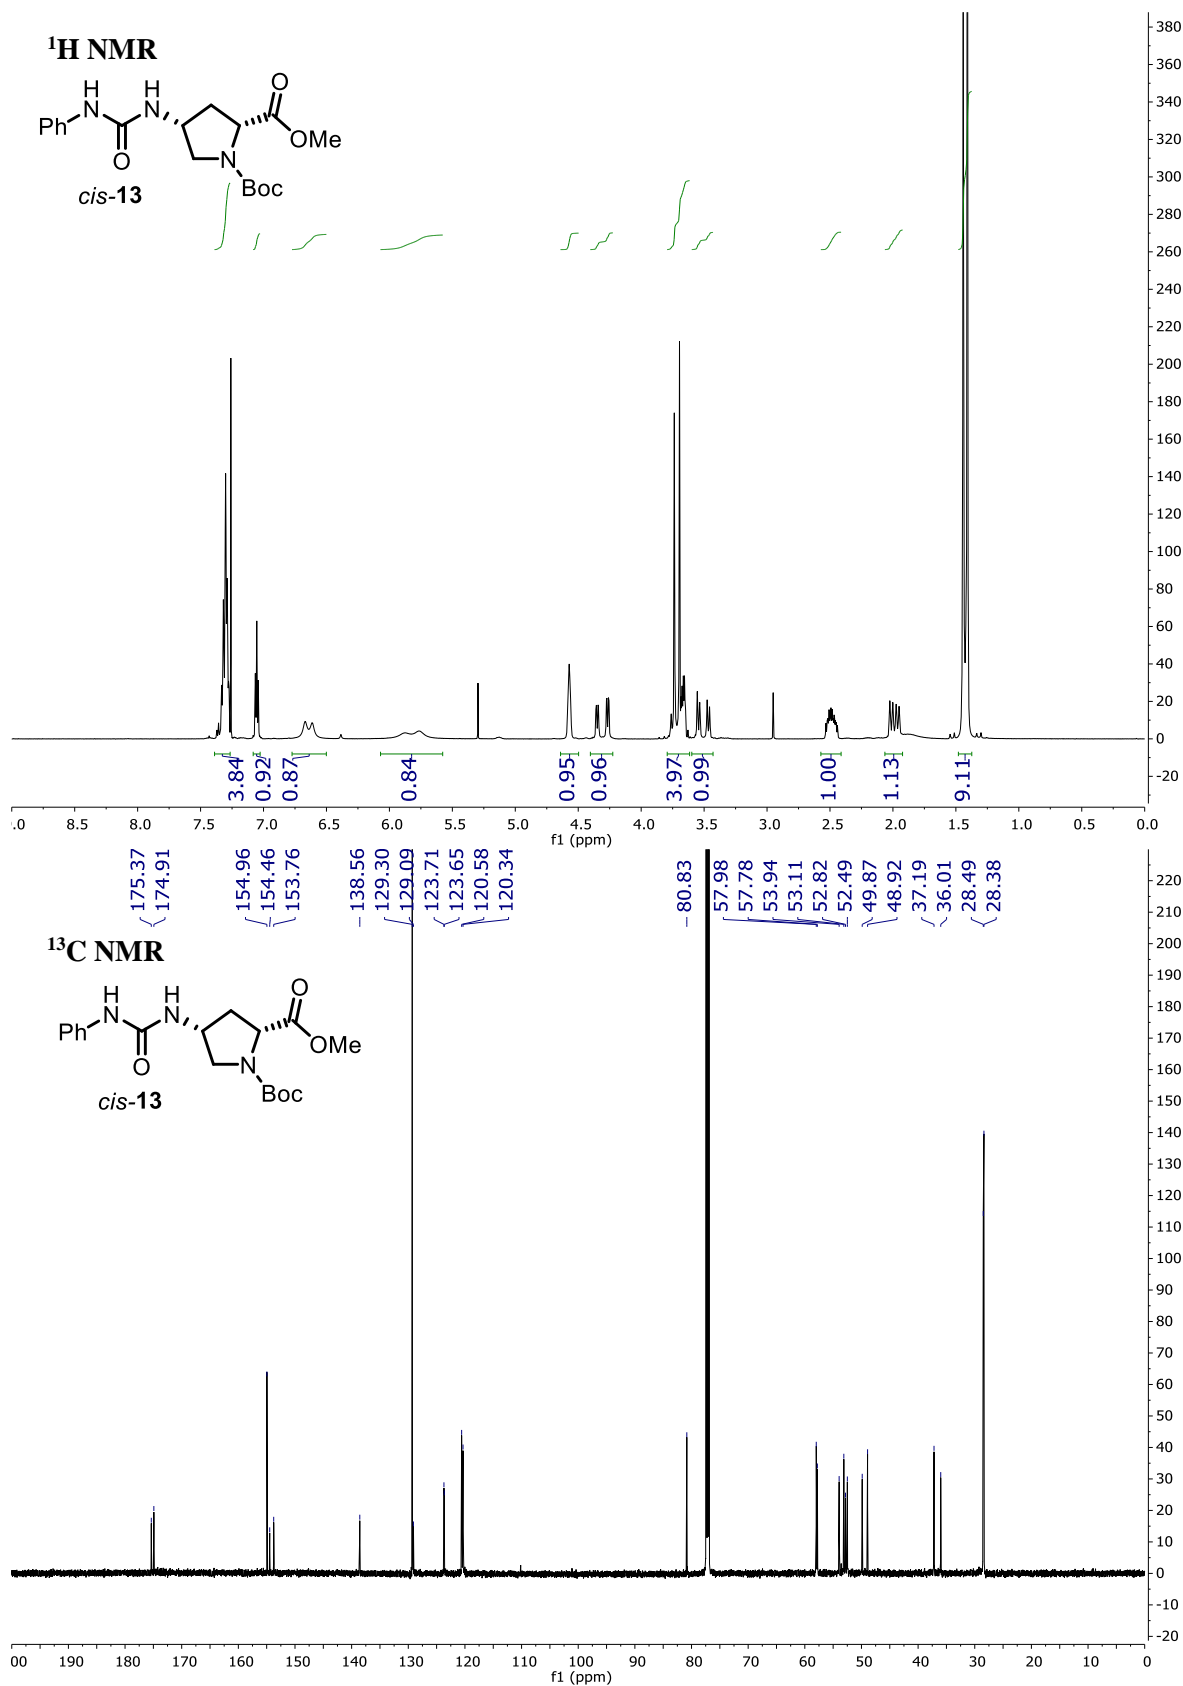



Additional peaks in  $^{31}\text{P}$  NMR of Peptides are presumably either different conformations of peptides or diastereomers of the P-atom.

**Fmoc-pThr(Bn)-<sup>D</sup> Pro-Acpc-Met-OMe (P1)**

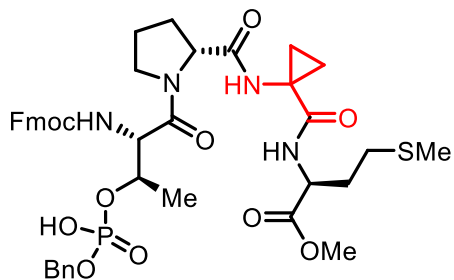

**Synthesis:** General Procedure #1  
**Scale:** 0.600 mmol wrt **S6**  
**Yield:** 502 mg white solid (63% yield)  
 $^{31}\text{P}$  NMR: (162 MHz,  $\text{CDCl}_3$ )  $\delta$  -0.20.

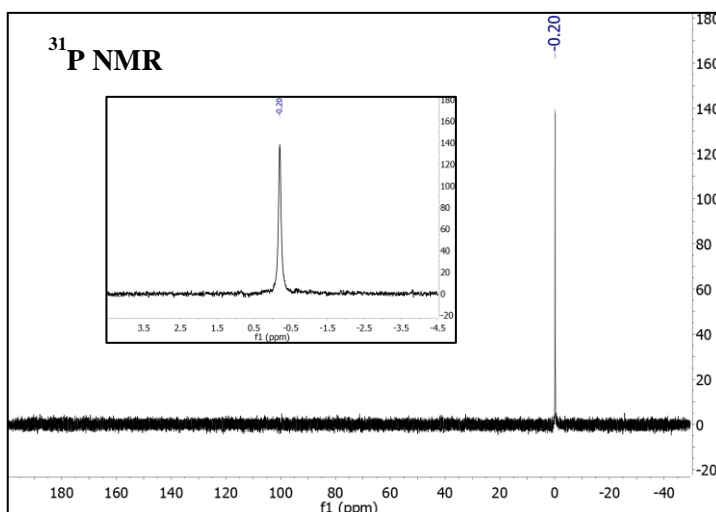

**Fmoc-pThr(Bn)-<sup>D</sup> Pro-Tle-Leu-OMe (P2)**

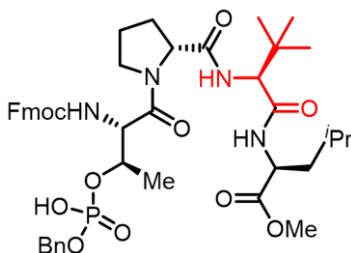

**Synthesis:** General Procedure #1  
**Scale:** 0.606 mmol wrt **S6**  
**Yield:** 221 mg white solid (43% yield)  
 $^{31}\text{P}$  NMR: (162 MHz,  $\text{CDCl}_3$ )  $\delta$  -1.75.

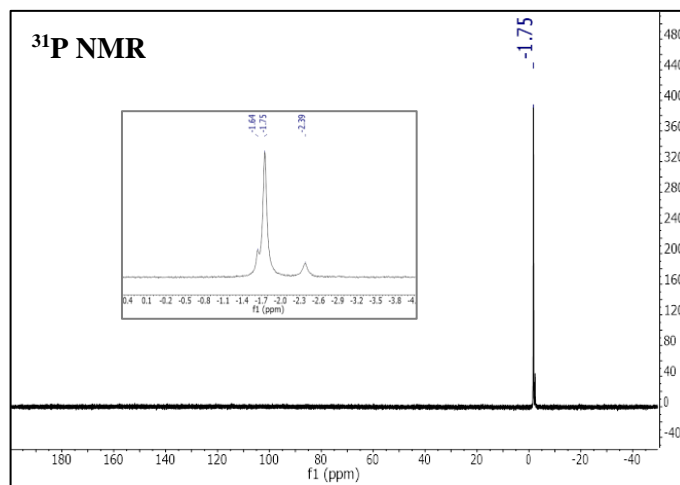

**Fmoc-pThr(Bn)-<sup>D</sup> Pro-Trp-Leu-OMe (P3)**

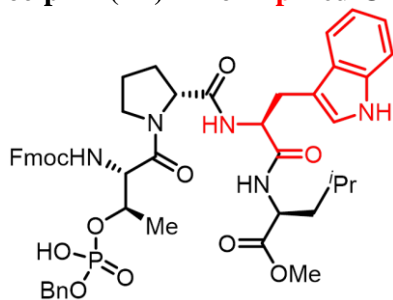

**Synthesis:** General Procedure #1  
**Scale:** 0.648 mmol wrt **S6**  
**Yield:** 228 mg white solid (38% yield)  
 $^{31}\text{P}$  NMR: (162 MHz,  $\text{CDCl}_3$ )  $\delta$  -1.43.

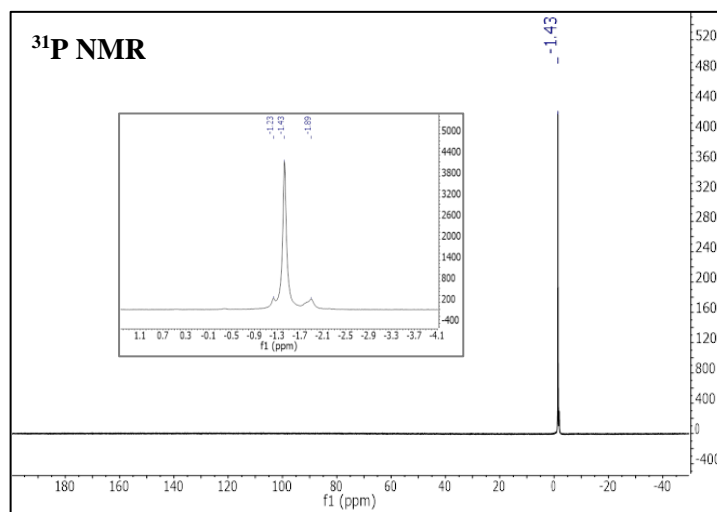

**Fmoc-pThr(Bn)-<sup>D</sup>Pro-Thr(Me)-Leu-OMe (P4)**

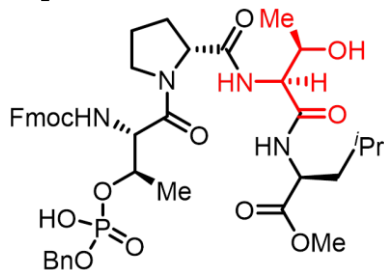

**Synthesis:** General Procedure #1

**Scale:** 0.780 mmol wrt **S6**

**Yield:** 296 mg white solid (51% yield)

**<sup>31</sup>P NMR:** (202 MHz, CDCl<sub>3</sub>) δ -1.13.

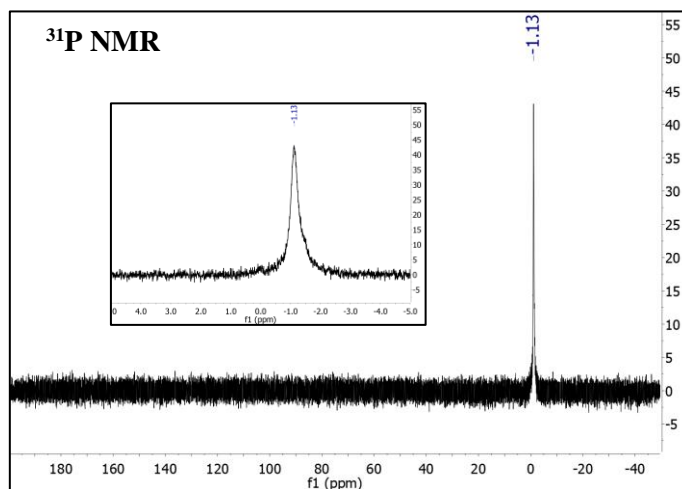

**Fmoc-pThr(Bn)-<sup>D</sup>Pro-Chg-Leu-OMe (P5)**

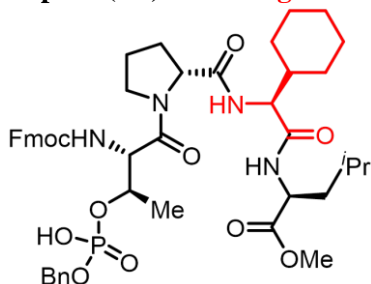

**Synthesis:** General Procedure #1

**Scale:** 0.648 mmol wrt **S6**

**Yield:** 407 mg white solid (71% yield)

**<sup>31</sup>P NMR:** (162 MHz, CDCl<sub>3</sub>) δ -1.32.

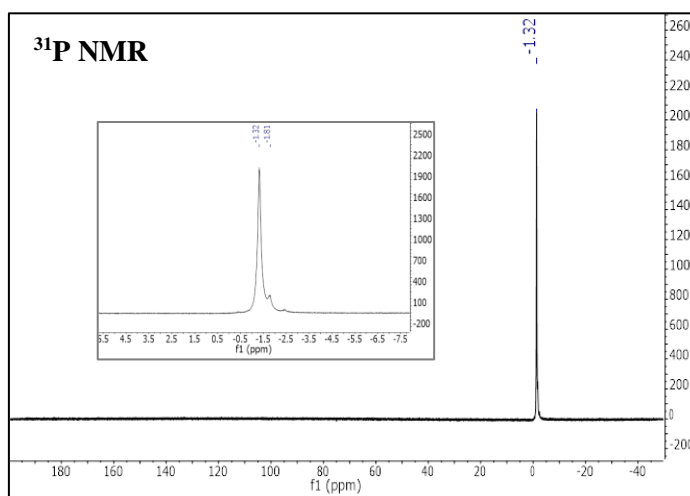

**Fmoc-pThr(Bn)-<sup>D</sup>Pro-Cha-Leu-OMe (P6)**

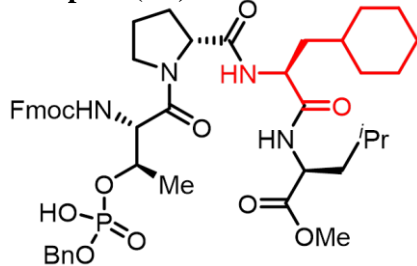

**Synthesis:** General Procedure #1

**Scale:** 0.648 mmol wrt **S6**

**Yield:** 379 mg white solid (66% yield)

**<sup>31</sup>P NMR:** (162 MHz, CDCl<sub>3</sub>) δ -0.70.

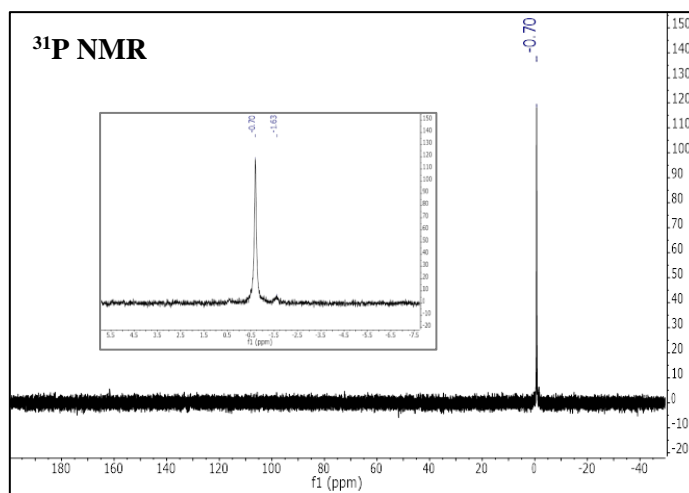

**Fmoc-pThr(Bn)-<sup>D</sup>Pro-Phg-Leu-OMe (P7)**

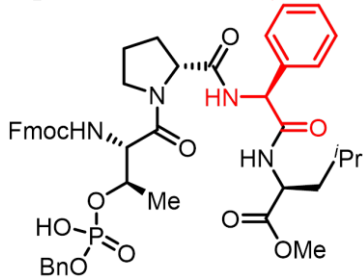

**Synthesis:** General Procedure #1

**Scale:** 0.648 mmol wrt **S6**

**Yield:** 347 white solid (62% yield)

**<sup>31</sup>P NMR:** (202 MHz, CDCl<sub>3</sub>) δ -0.40.

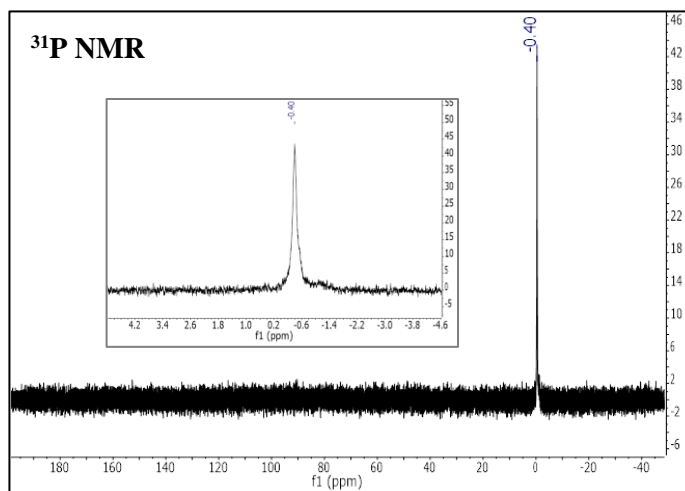

**Fmoc-pThr(Bn)-<sup>D</sup>Pro-Phe-Leu-OMe (P8)**

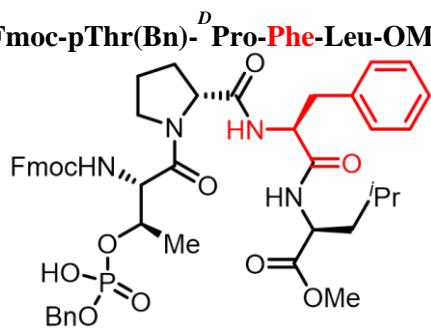

**Synthesis:** General Procedure #1

**Scale:** 0.648 mmol wrt **S6**

**Yield:** 210 mg white solid (37% yield)

**<sup>31</sup>P NMR:** (162 MHz, CDCl<sub>3</sub>) δ -1.30.

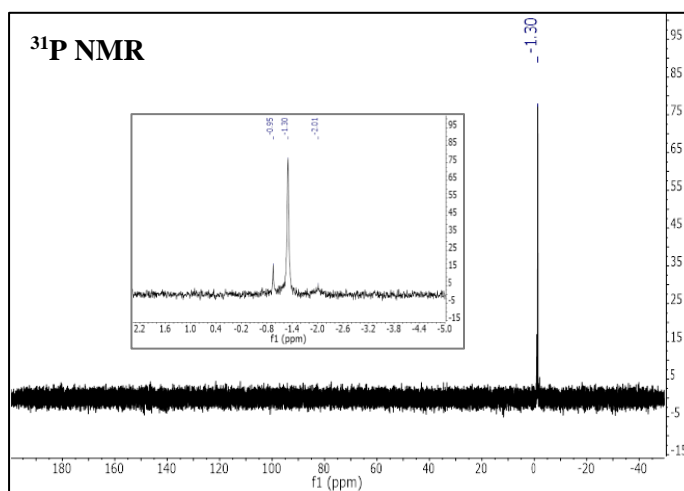

**Fmoc-pThr(Bn)-<sup>D</sup>Pro-Ala-Leu-OMe (P9)**

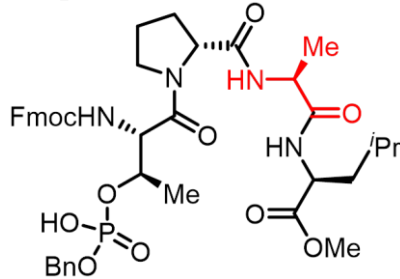

**Synthesis:** General Procedure #1

**Scale:** 0.648 mmol wrt **S6**

**Yield:** 309 mg white solid (59% yield)

**<sup>31</sup>P NMR:** (162 MHz, CDCl<sub>3</sub>) δ -1.25.

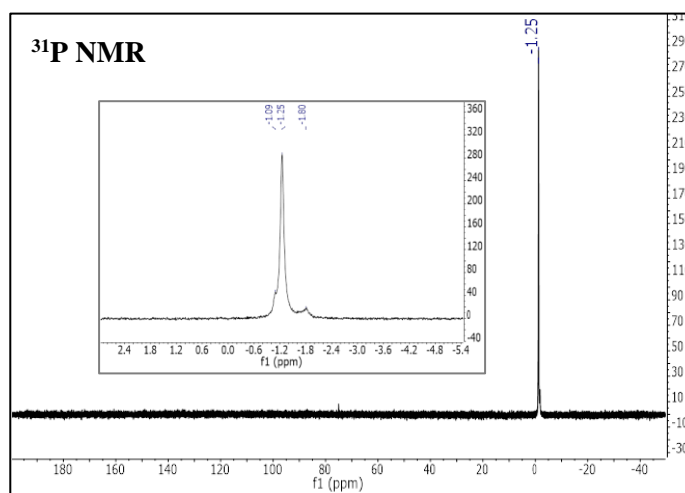

**Fmoc-pThr(Bn)-<sup>D</sup>Pro-Ile-Leu-OMe (P10)**

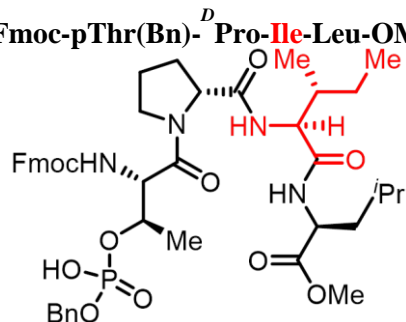

**Synthesis:** General Procedure #1

**Scale:** 0.648 mmol wrt **S6**

**Yield:** 424 mg white solid (77% yield)

**<sup>31</sup>P NMR:** (162 MHz, CDCl<sub>3</sub>) δ -0.33.

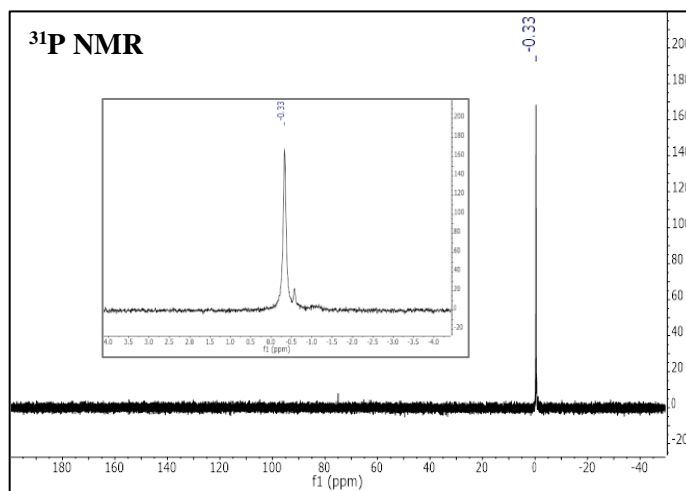

**Fmoc-pThr(Bn)-<sup>D</sup>Pro-Leu-Leu-OMe (P11)**

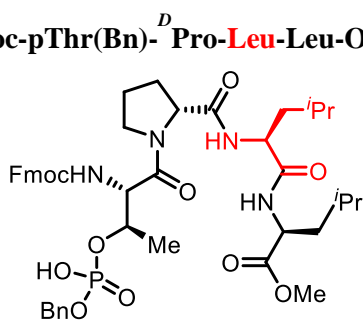

**Synthesis:** General Procedure #1

**Scale:** 0.648 mmol wrt **S6**

**Yield:** 406 mg white solid (56% yield)

**<sup>31</sup>P NMR:** (162 MHz, CDCl<sub>3</sub>) δ -0.68.

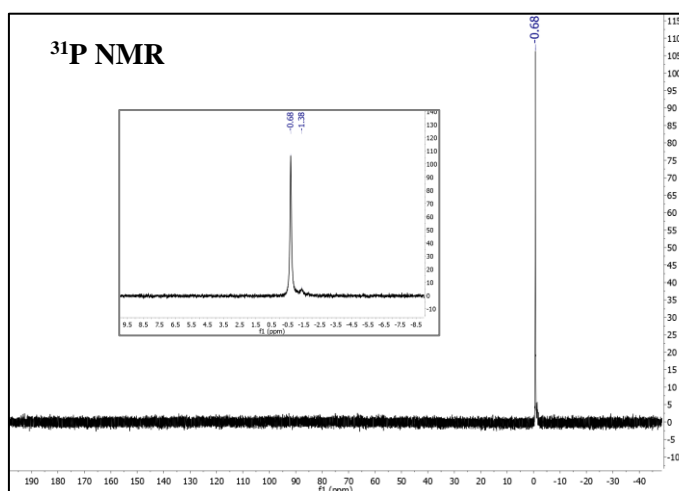

**Fmoc-pThr(Bn)-<sup>D</sup>Pro-Val-Leu-OMe (P12)**

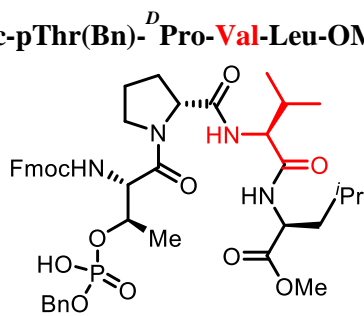

**Synthesis:** General Procedure #1

**Scale:** 1.22 mmol wrt **S6**

**Yield:** 874 mg white solid (86% yield)

**<sup>31</sup>P NMR:** (162 MHz, CDCl<sub>3</sub>) δ -0.79.

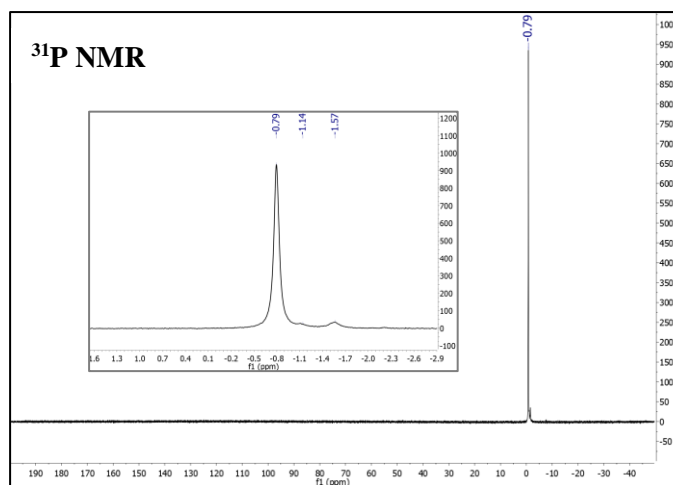

**Fmoc-pThr(Bn)-<sup>D</sup>Pro-<sup>D</sup>Tle-Leu-OMe (P13)**

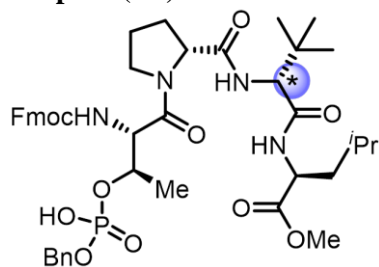

**Synthesis:** General Procedure #1

**Scale:** 0.648 mmol wrt **S6**

**Yield:** 223 mg white solid (41% yield)

**<sup>31</sup>P NMR:** (162 MHz, CDCl<sub>3</sub>) δ -1.44.

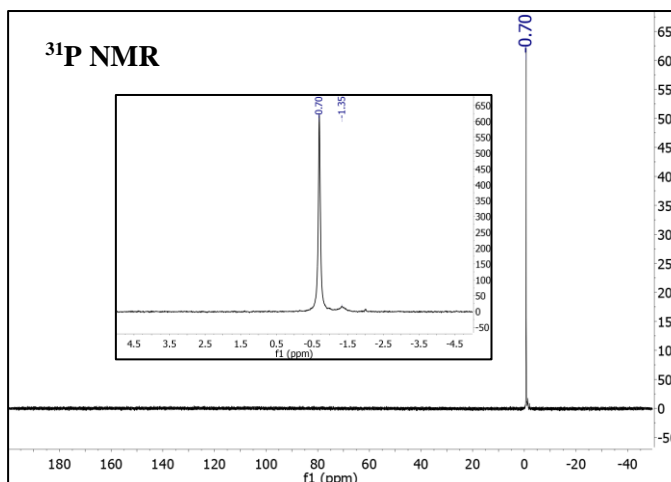

**Fmoc-pThr(Bn)-Pro-<sup>D</sup>Tle-Leu-OMe (P14)**

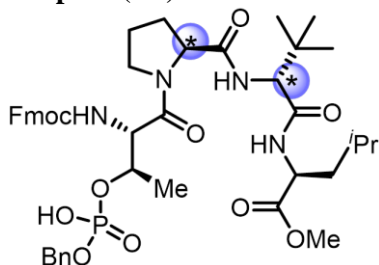

**Synthesis:** General Procedure #1

**Scale:** 0.648 mmol wrt **S6**

**Yield:** 378 mg white solid (69% yield)

**<sup>31</sup>P NMR:** (162 MHz, CDCl<sub>3</sub>) δ -2.66.

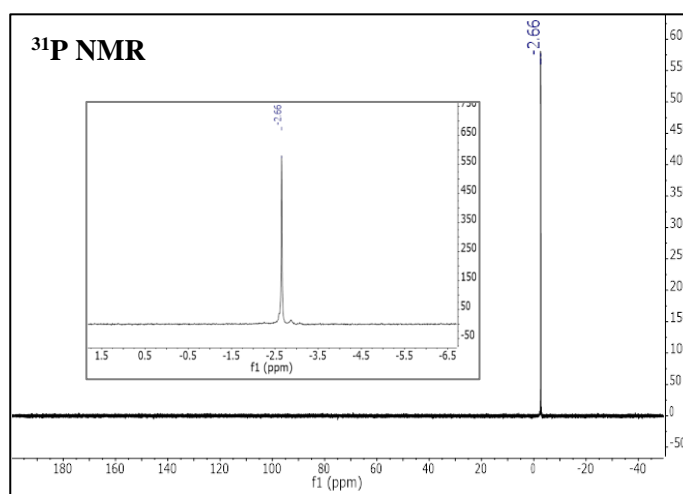

**Fmoc-*allo*-pThr(Bn)-<sup>D</sup>Pro-Val-Leu-OMe (P15)**

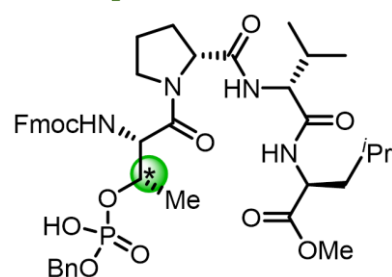

**Synthesis:** General Procedure #1

**Scale:** 0.293 mmol wrt *diast*-**S6**

**Yield:** 210 mg white solid (86% yield)

**<sup>31</sup>P NMR:** (162 MHz, CDCl<sub>3</sub>) δ -0.74.

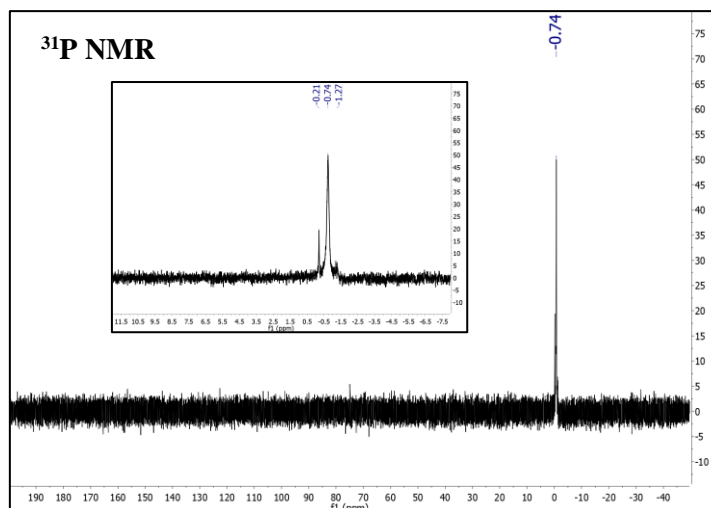

**Fmoc-<sup>D</sup>pThr(Bn)-Pro-Val-Leu-OMe (P16)**

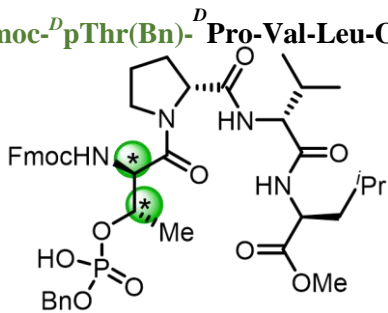

**Synthesis:** General Procedure #1

**Scale:** 0.196 mmol wrt *ent*-S6

**Yield:** 108 mg white solid (66% yield)

**<sup>31</sup>P NMR:** (162 MHz, CDCl<sub>3</sub>) δ -2.01.

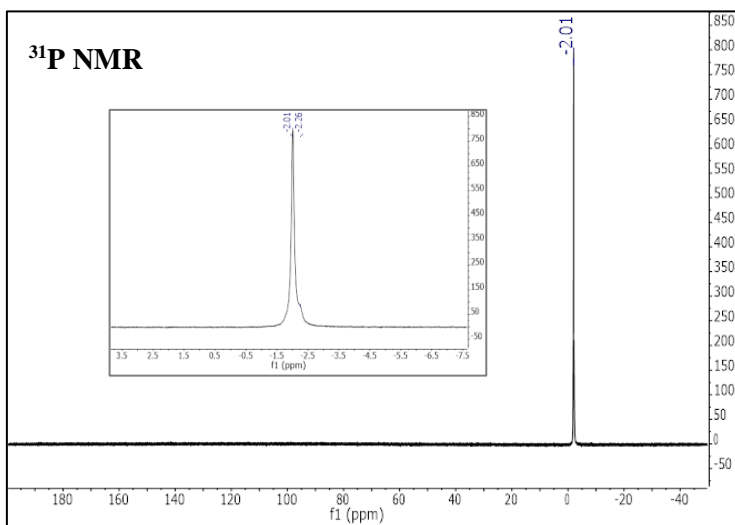

**Fmoc-pSer(Bn)-<sup>D</sup>Pro-Val-Leu-OMe (P17)**

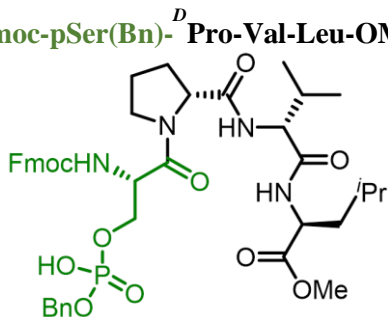

**Synthesis:** General Procedure #1

**Scale:** 0.606 mmol wrt pSer monomer

**Yield:** yield not reported

**<sup>31</sup>P NMR:** (162 MHz, CDCl<sub>3</sub>) δ -1.59.

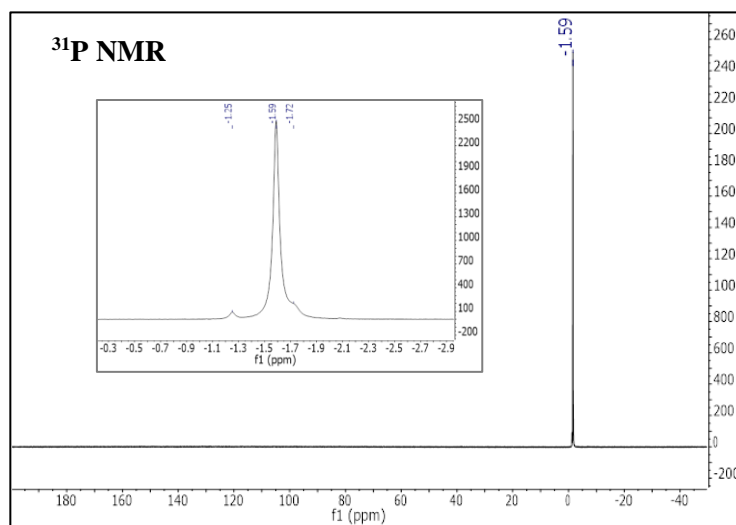

**Fmoc-pThr(Bn)-<sup>D</sup>Pro(4-*trans*-Ph-urea)-Val-Leu-OMe (P18)**

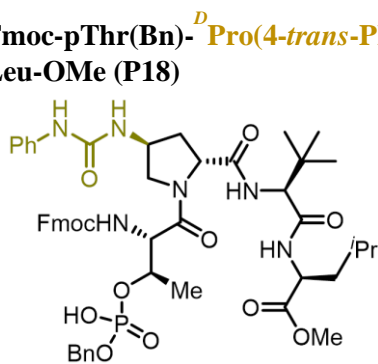

**Synthesis:** General Procedures #1 and #7

**Scale:** 0.614 mmol wrt S6

**Yield:** 440 mg white solid (73% yield)

**<sup>31</sup>P NMR:** (162 MHz, CDCl<sub>3</sub>) δ -1.81.

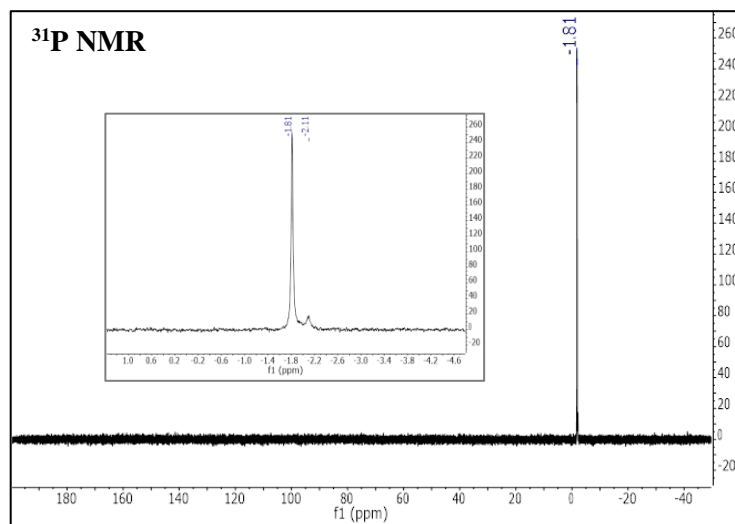

**Fmoc-pThr(Bn)-<sup>D</sup>Pro(4-cis-Ph-urea)-Val-Leu-OMe (P19)**

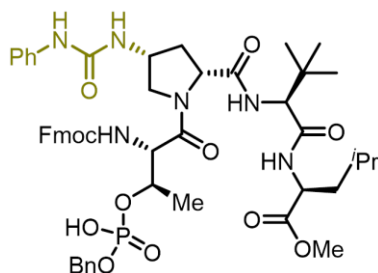

**Synthesis:** General Procedures #1 and #8

**Scale:** 0.244 mmol wrt **S6**

**Yield:** 188 mg white solid (78% yield)

**<sup>31</sup>P NMR:** (202 MHz, CDCl<sub>3</sub>) δ -0.60.

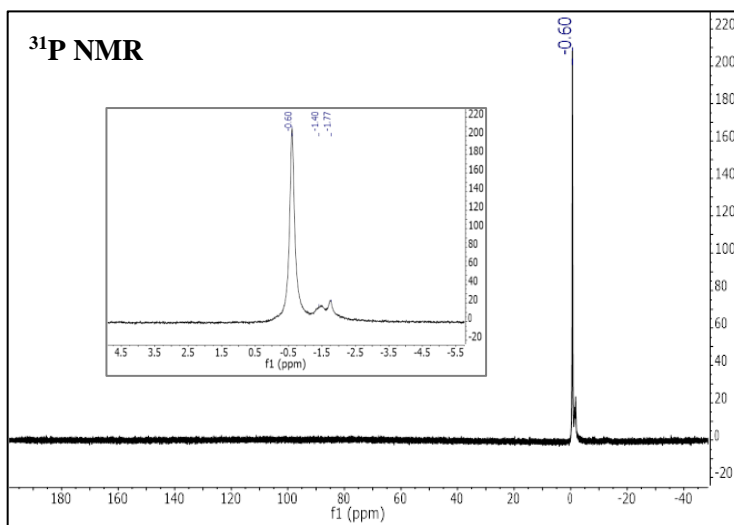

**Ac-pThr(Bn)-<sup>D</sup>Pro-Val-Leu-OMe (P20)**

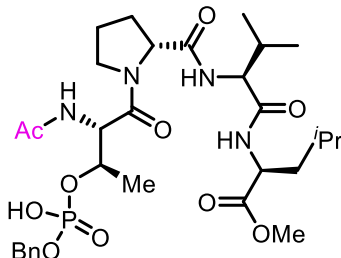

**Synthesis:** General Procedures #1 and #6

**Scale:** 0.240 mmol wrt **P11**

**Yield:** 56.5 mg white solid (36% yield)

**<sup>31</sup>P NMR:** (202 MHz, CDCl<sub>3</sub>) δ -1.68.

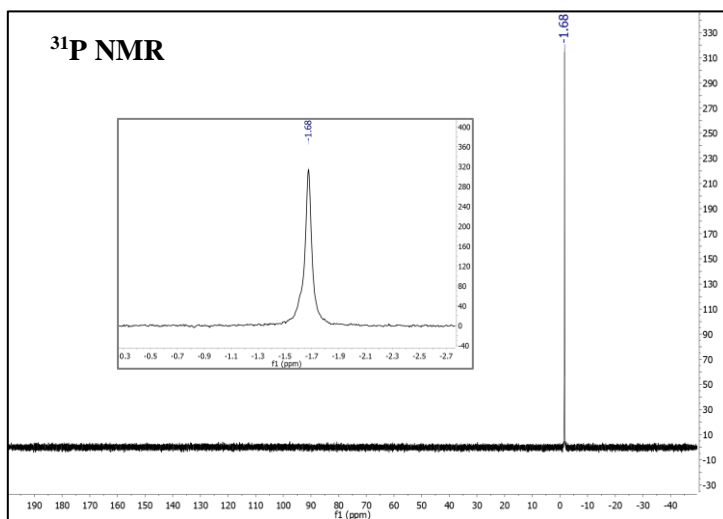

**Cbz-pThr(Bn)-<sup>D</sup>Pro-Val-Leu-OMe (P21)**

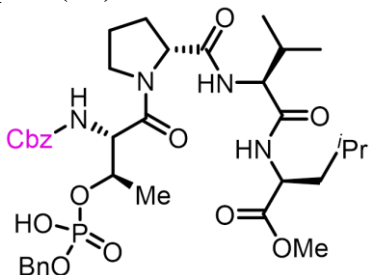

**Synthesis:** General Procedures #1

**Scale:** 0.228 mmol wrt **P11**

**Yield:** not determined

**<sup>31</sup>P NMR:** (202 MHz, CDCl<sub>3</sub>) δ -1.84.

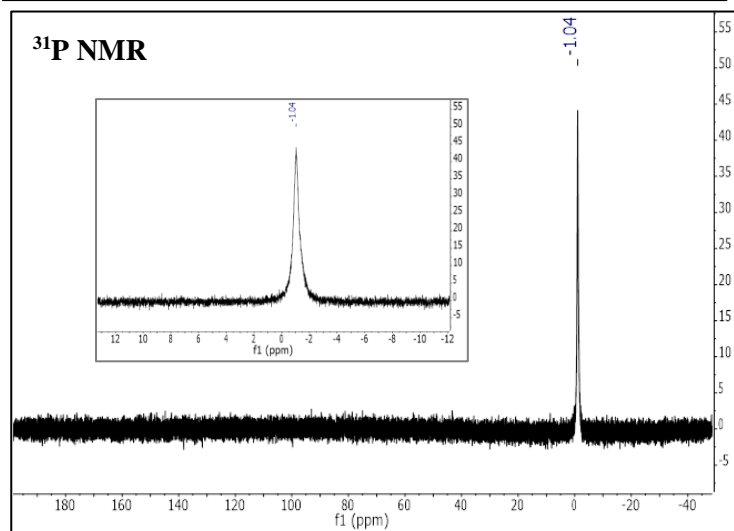

***p*-O<sub>2</sub>N-Bz-pThr(Bn)-<sup>D</sup> Pro-Val-Leu-OMe (P22)**

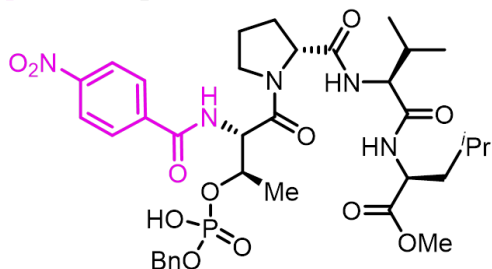

**Synthesis:** General Procedures #1 and #5

**Scale:** 0.240 mmol wrt **P11**

**Yield:** 72.2 mg white solid (39% yield)

**<sup>31</sup>P NMR:** (162 MHz, CDCl<sub>3</sub>) δ -0.54.

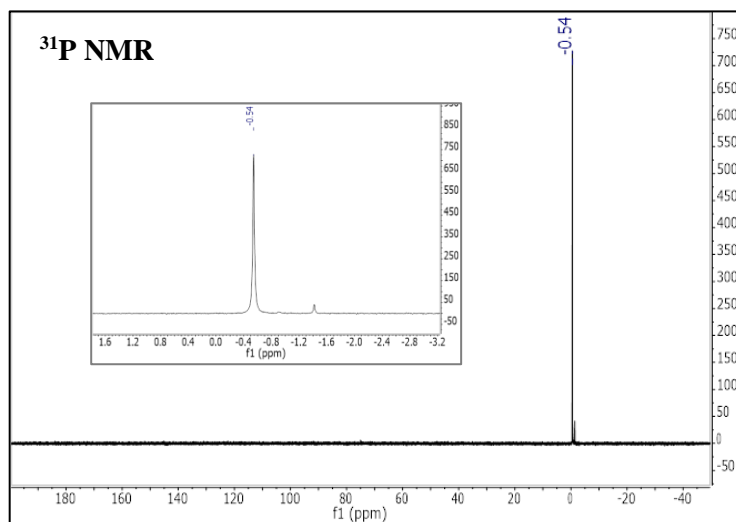

**Bz-pThr(Bn)-<sup>D</sup> Pro-Val-Leu-OMe (P23)**

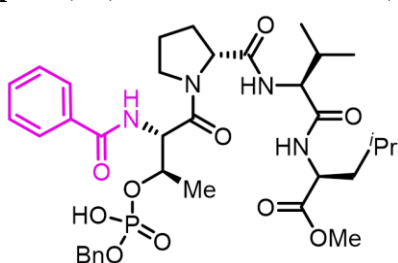

**Synthesis:** General Procedures #1 and #5

**Scale:** 0.400 mmol wrt **P11**

**Yield:** 143 mg white solid (50 % yield)

**<sup>31</sup>P NMR:** (162 MHz, CDCl<sub>3</sub>) δ 0.01.

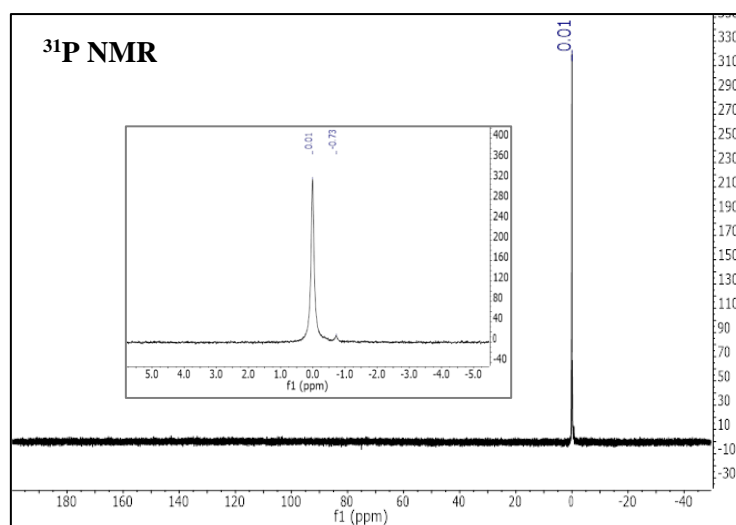

***p*-MeO-Bz-pThr(Bn)-<sup>D</sup> Pro-Val-Leu-OMe (P24)**

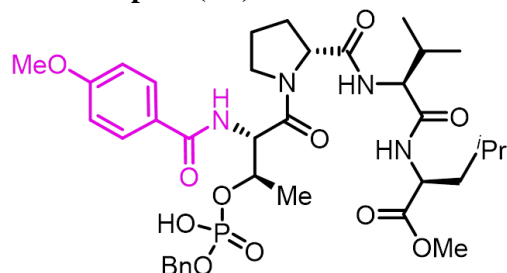

**Synthesis:** General Procedures #1 and #5

**Scale:** 0.240 mmol wrt **P11**

**Yield:** 150 mg white solid (84 % yield)

**<sup>31</sup>P NMR:** (162 MHz, CDCl<sub>3</sub>) δ -1.05.

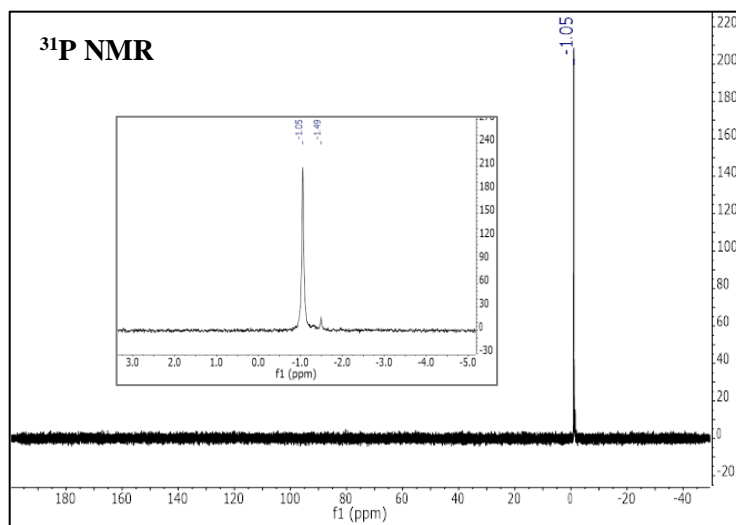



**Furanoyl-pThr(Bn)-<sup>D</sup>Pro-Val-Leu-OMe (P25)**

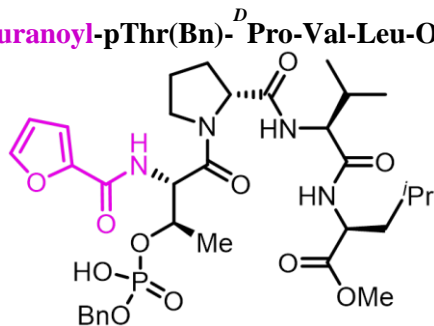

**Synthesis:** General Procedures #1 and #5

**Scale:** 0.400 mmol wrt **P11**

**Yield:** 136 mg white solid (48% yield)

**<sup>31</sup>P NMR:** (162 MHz, CDCl<sub>3</sub>) δ -0.58.

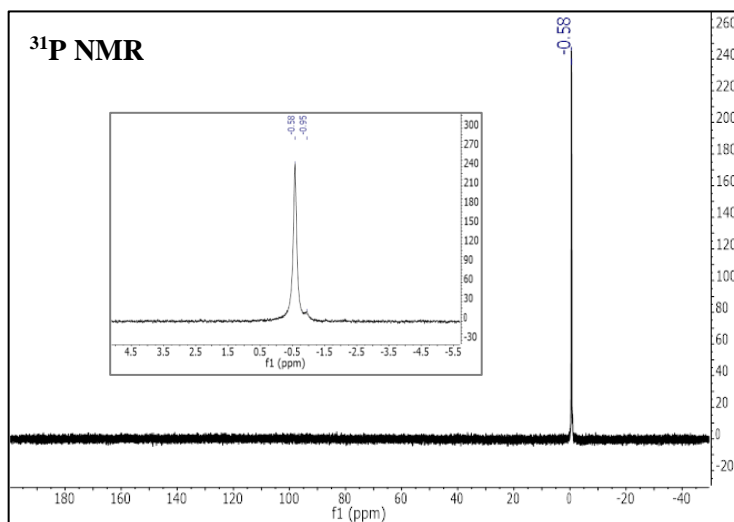

**2D NMR Details:** Spectra were acquired on Agilent 600 MHz spectrometers at ambient temperature in C<sub>6</sub>D<sub>6</sub>.

**<sup>1</sup>H NMR:** scans = 64, pulse width = 8.75, spectral width = 16.0, d1 relaxation delay = 22.02 s.

**<sup>1</sup>H-<sup>1</sup>H COSY:** scans per t1 = 2, t1 increments = 512, pulse width = 8.75, d1 = 5 s, spectral width = 18.

**<sup>1</sup>H-<sup>13</sup>C HSQC:** scans per t1 = 4, t1 increments = 256, pulse width = 8.5, d1 = 3.74.

**<sup>1</sup>H-<sup>1</sup>H NOESY:** scans = 8, t1 increments = 400, pulse width = 8.75, mixing time = 300 ms, d1 = 5.0 s, spectral width = 18.

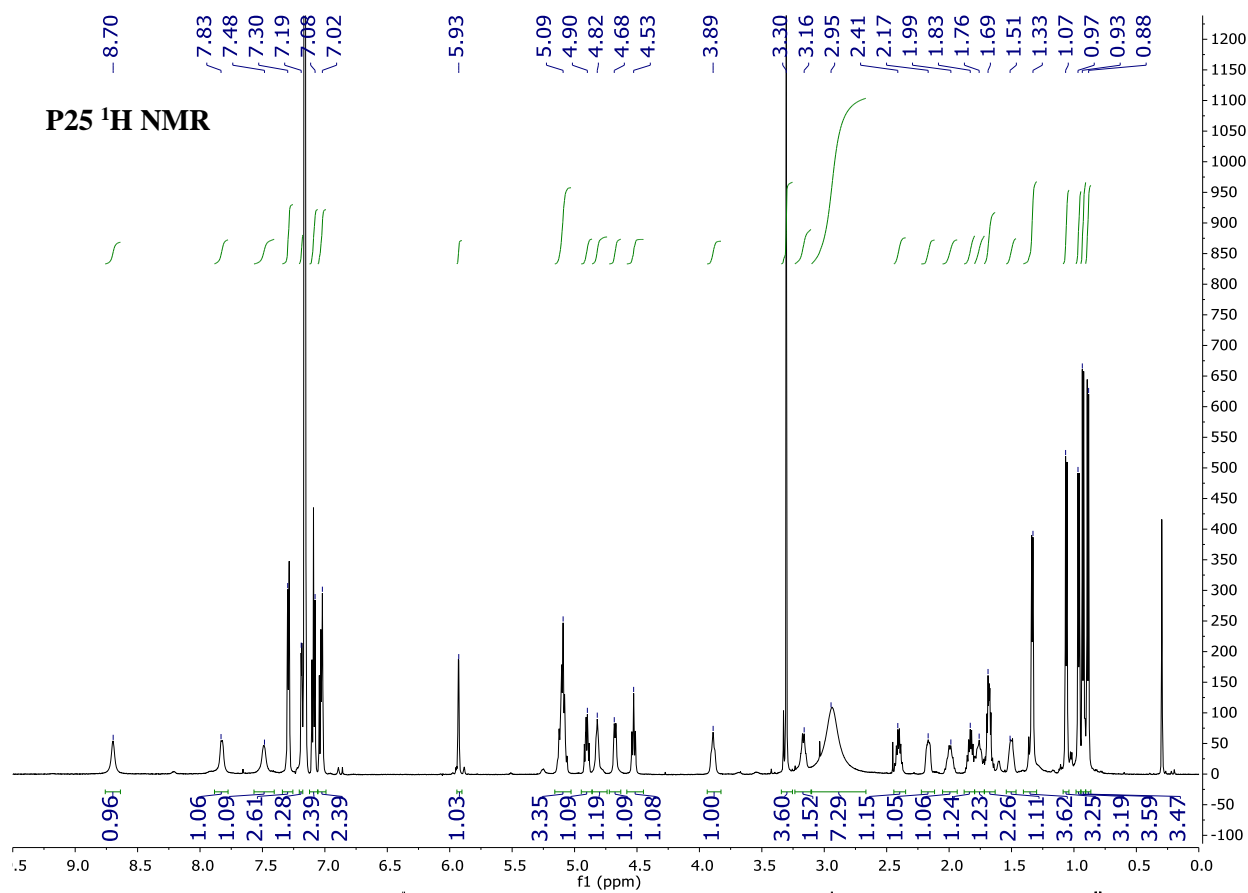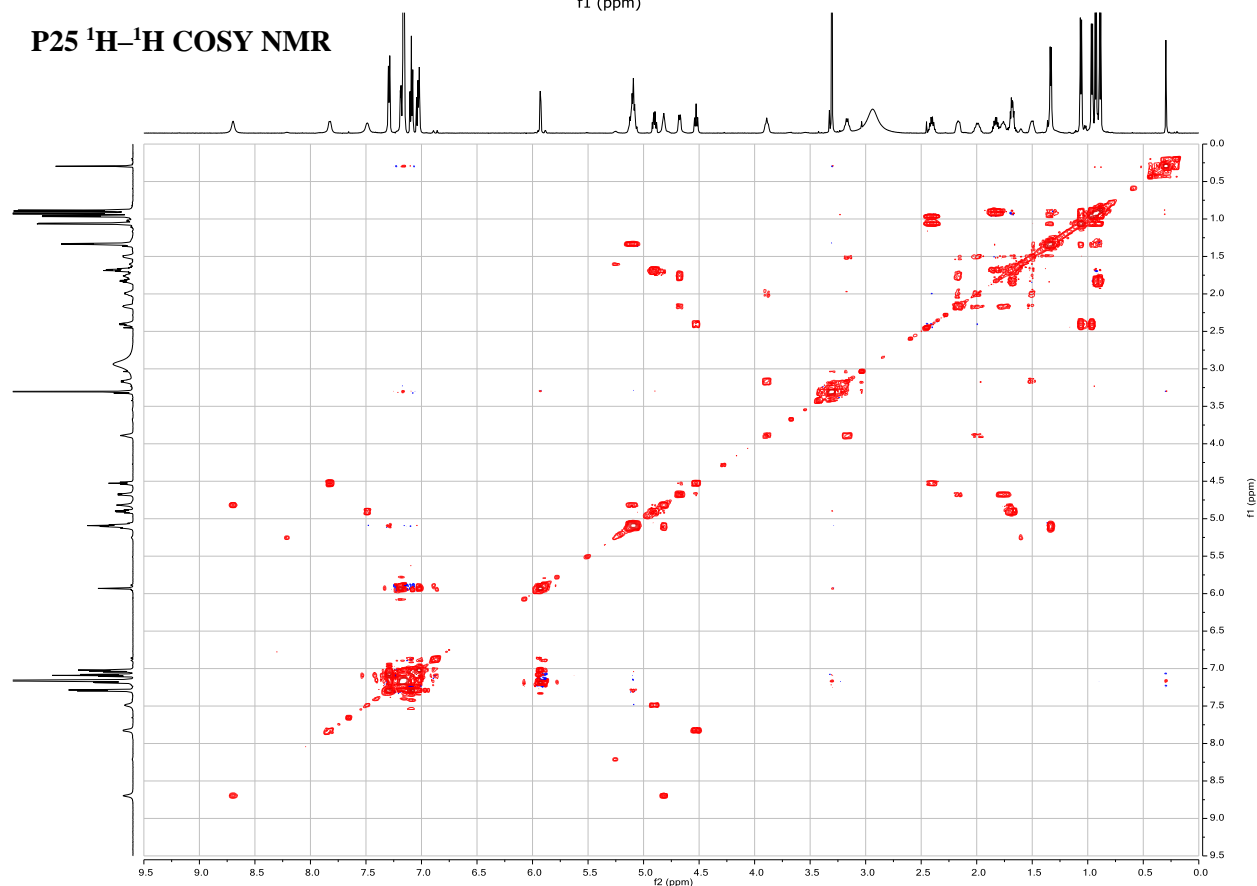

**P25  $^1\text{H}$ - $^{13}\text{C}$   
HSQC NMR**

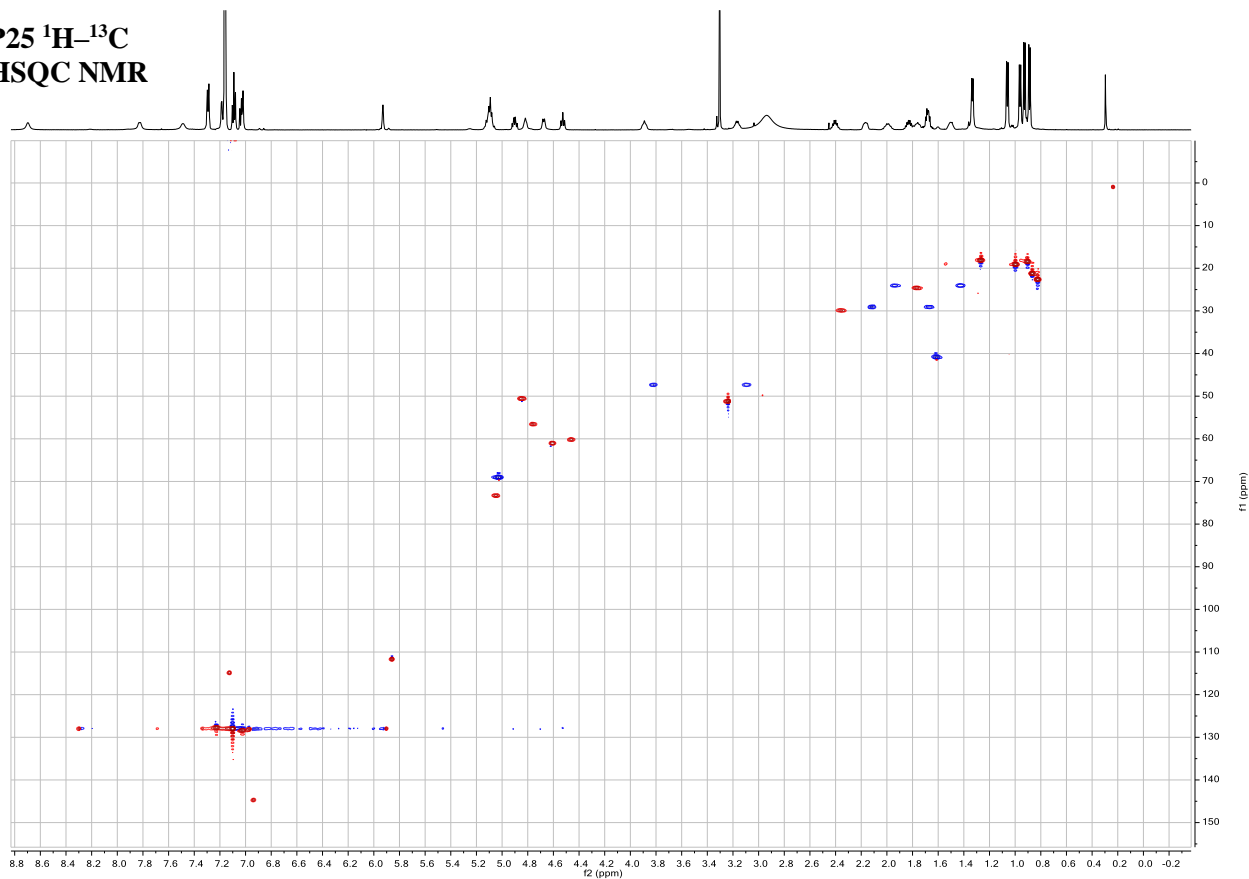

**P25  $^1\text{H}$ - $^1\text{H}$  NOESY NMR**

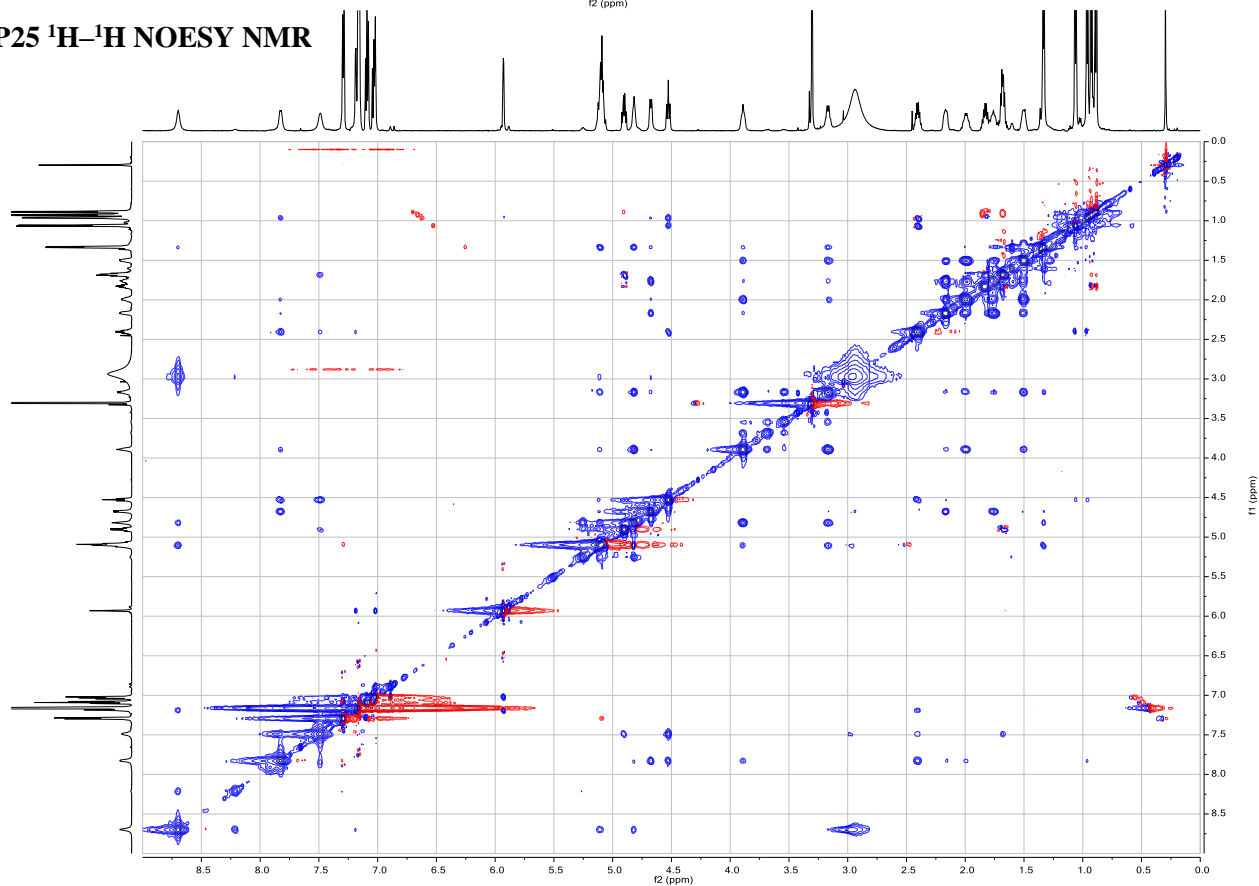

**Fmoc-pThr(Bn)-<sup>D</sup>Pro-Val-NHMe (P26)**

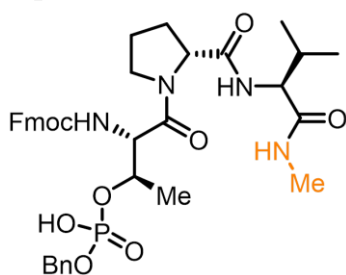

**Synthesis:** General Procedures #1 and #2

**Scale:** 1.47 mmol wrt **S6**

**Yield:** 997 mg white solid (94% yield)

**<sup>31</sup>P NMR:** (162 MHz, CDCl<sub>3</sub>) δ -1.16.

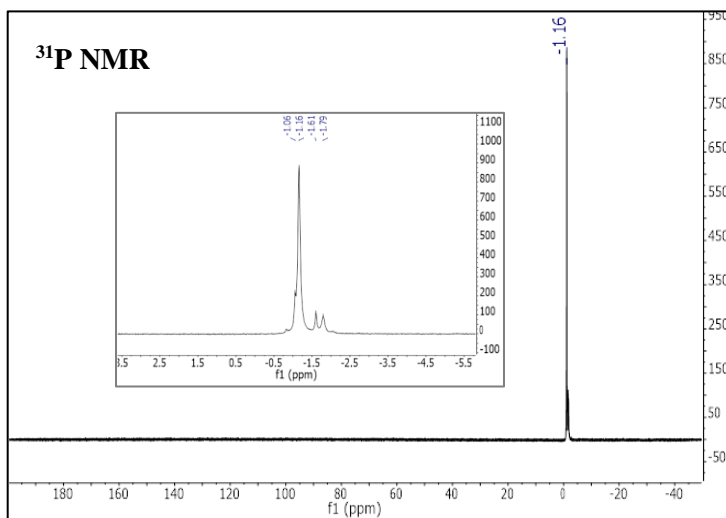

**Fmoc-pThr(Bn)-<sup>D</sup>Pro-Val-OMe (P27)**

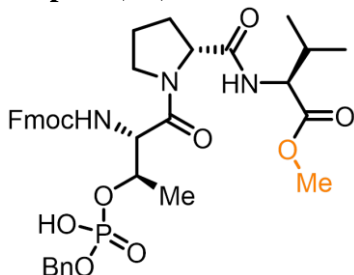

**Synthesis:** General Procedure #1

**Scale:** 2.77 mmol wrt **S6**

**Yield:** 1.63 g white solid (82% yield)

**<sup>31</sup>P NMR:** (162 MHz, CDCl<sub>3</sub>) δ -0.86.

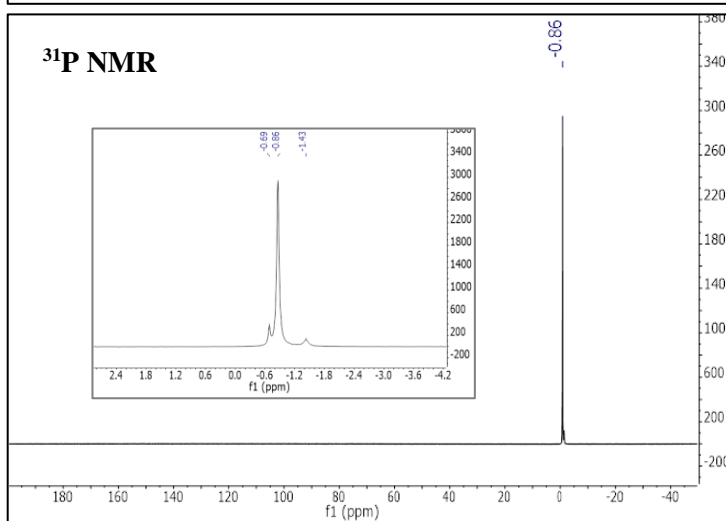

**Fmoc-pThr(Bn)-<sup>D</sup>Pro-NHMe (P28)**

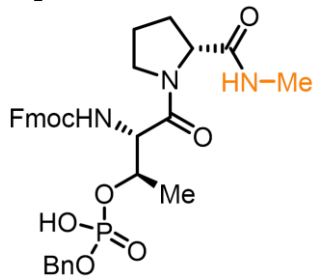

**Synthesis:** General Procedures #1 and #2

**Scale:** 2.16 mmol wrt **S6**

**Yield:** 1.07 g white solid (80% yield)

**<sup>31</sup>P NMR:** (162 MHz, CDCl<sub>3</sub>) δ -0.41.

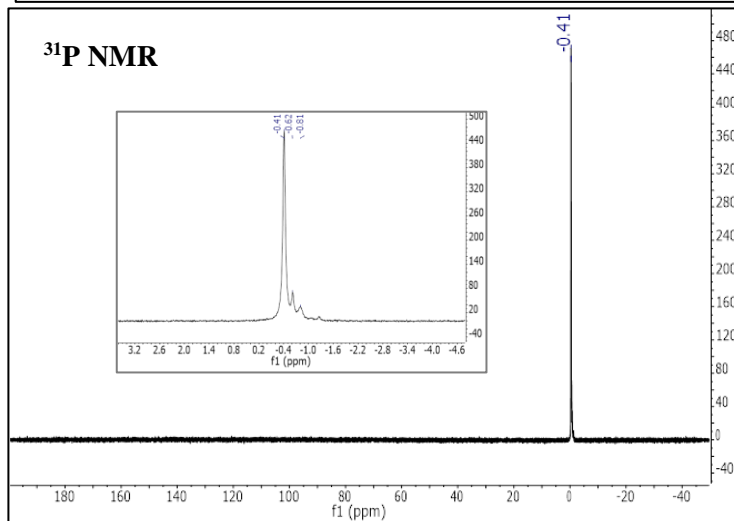

**Fmoc-pThr(Bn)-<sup>D</sup>Pro-OMe (P29)**

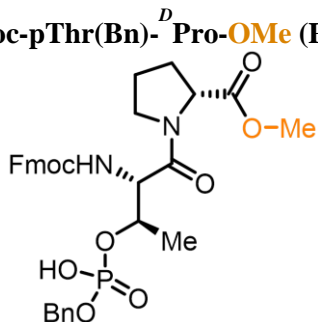

**Synthesis:** General Procedure #1

**Scale:** 0.250 mmol wrt **S6**

**Yield:** 50.2 mg white solid (32% yield)

**<sup>31</sup>P NMR:** (202 MHz, CDCl<sub>3</sub>) δ -0.06.

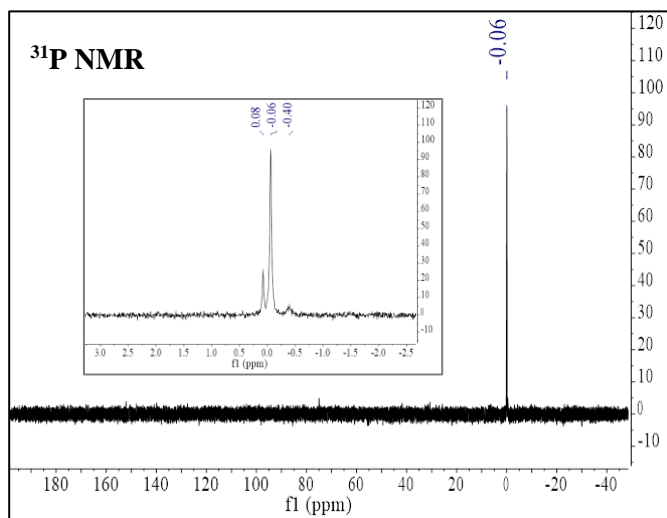

**Fmoc-pThr(Bn)-NMe<sub>2</sub> (P30)**

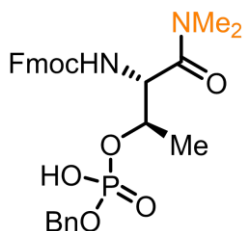

**Synthesis:** Procedure #3

**Scale:** 1.00 mmol wrt **S6**

**Yield:** 353 mg white solid (66% yield)

**<sup>31</sup>P NMR:** (162 MHz, CDCl<sub>3</sub>) δ -1.51.

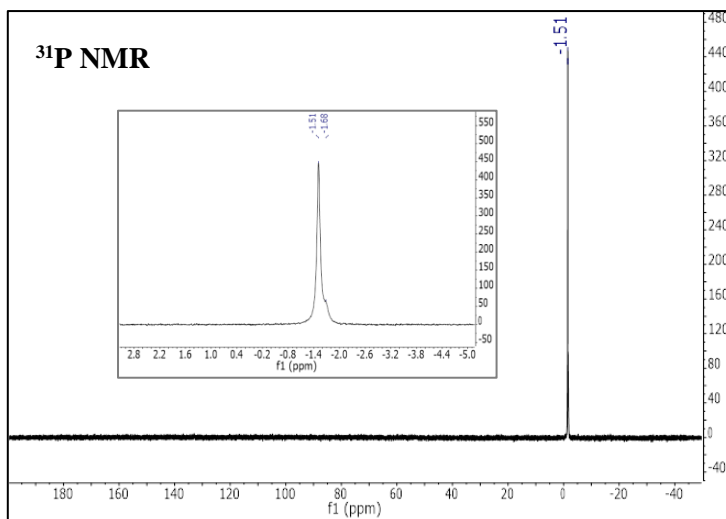

**p-MeO-Bz-pThr(Bn)-<sup>D</sup>Pro-Val-OMe (P31)**

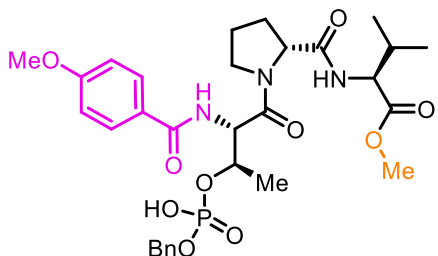

**Synthesis:** Procedure #1 and #5

**Scale:** 0.240 mmol wrt **P25**

**Yield:** 62.6 mg white solid (41% yield)

**<sup>31</sup>P NMR:** (162 MHz, CDCl<sub>3</sub>) δ -0.37.

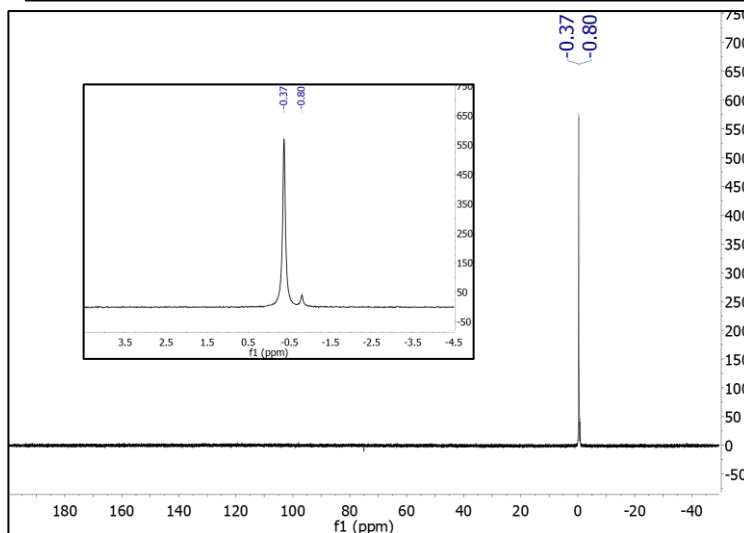

***p*-MeO-Bz-pThr(Bn)-<sup>D</sup>Pro-Val-Ser(<sup>t</sup>Bu)-OMe (P32)**

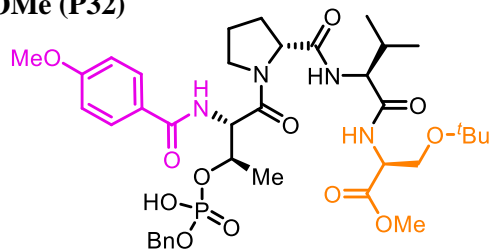

**Synthesis:** Procedure #4 and #5

**Scale:** 0.173 mmol wrt **S6**

**Yield:** 94.0 mg white solid (70% yield)

**<sup>31</sup>P NMR:** (162 MHz, CDCl<sub>3</sub>) δ -0.27.

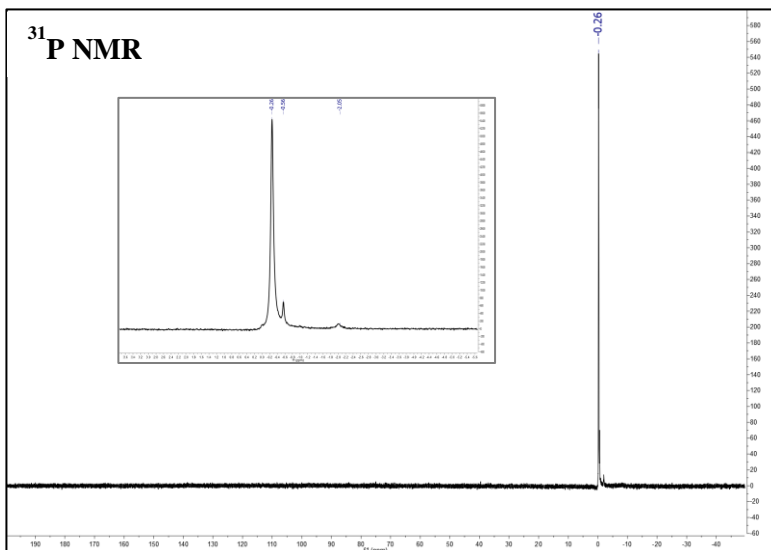

**Fmoc-pThr(Bn)-Pro-<sup>D</sup>Lys(Boc)-<sup>D</sup>Pro-Tyr(<sup>t</sup>Bu)-OMe (P33)**

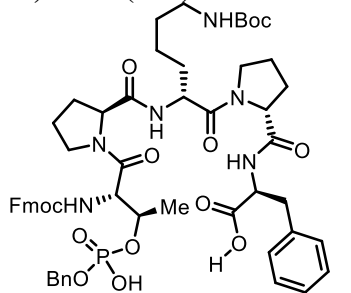

**Synthesis:** Procedure #4

**Scale:** 0.433 mmol wrt **S6**

**Yield:** 339 mg white solid (67% yield)

**<sup>31</sup>P NMR:** (162 MHz, CDCl<sub>3</sub>) δ -2.26.

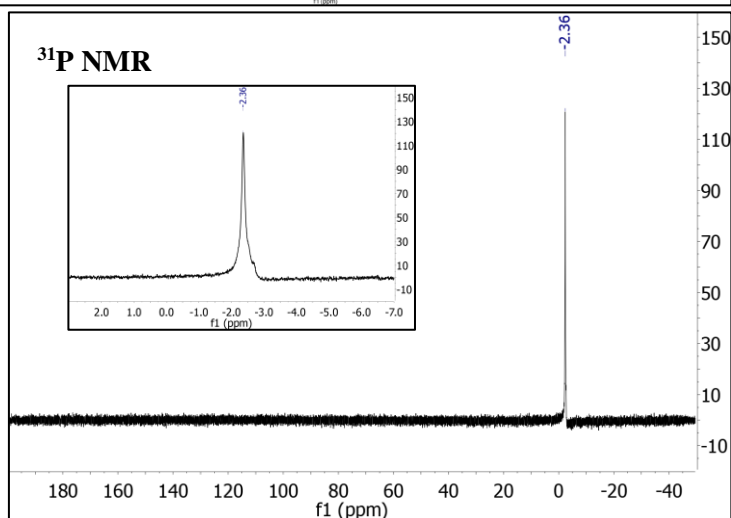

**Fmoc-pThr(Bn)-Pro-<sup>D</sup>Lys(Boc)-<sup>D</sup>Pro-Phe-OMe (P34)**

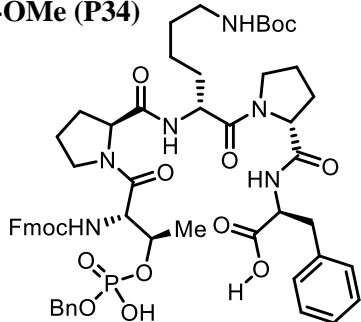

**Synthesis:** Procedure #4

**Scale:** 0.621 mmol wrt **S6**

**Yield:** 429 mg white solid (57% yield)

**<sup>31</sup>P NMR:** (162 MHz, CDCl<sub>3</sub>) δ -2.13.

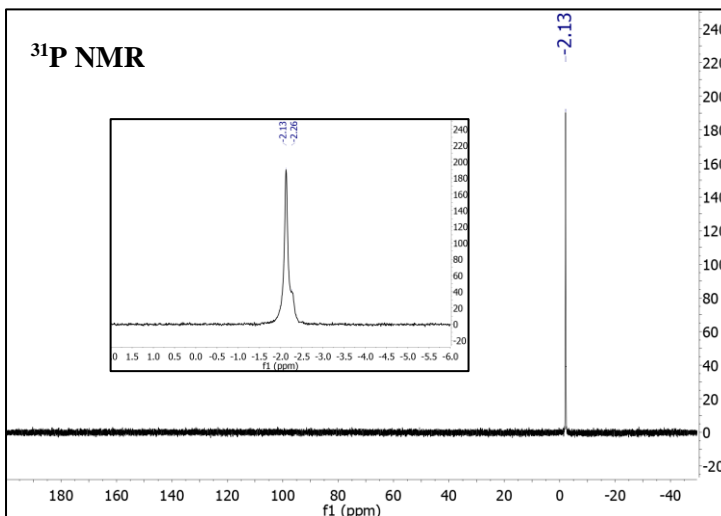

### 3. Characterization of 3-Amidocyclohexanones

**Scheme S8: Synthesis of Boc-Protected Precursor (Procedure #9)**

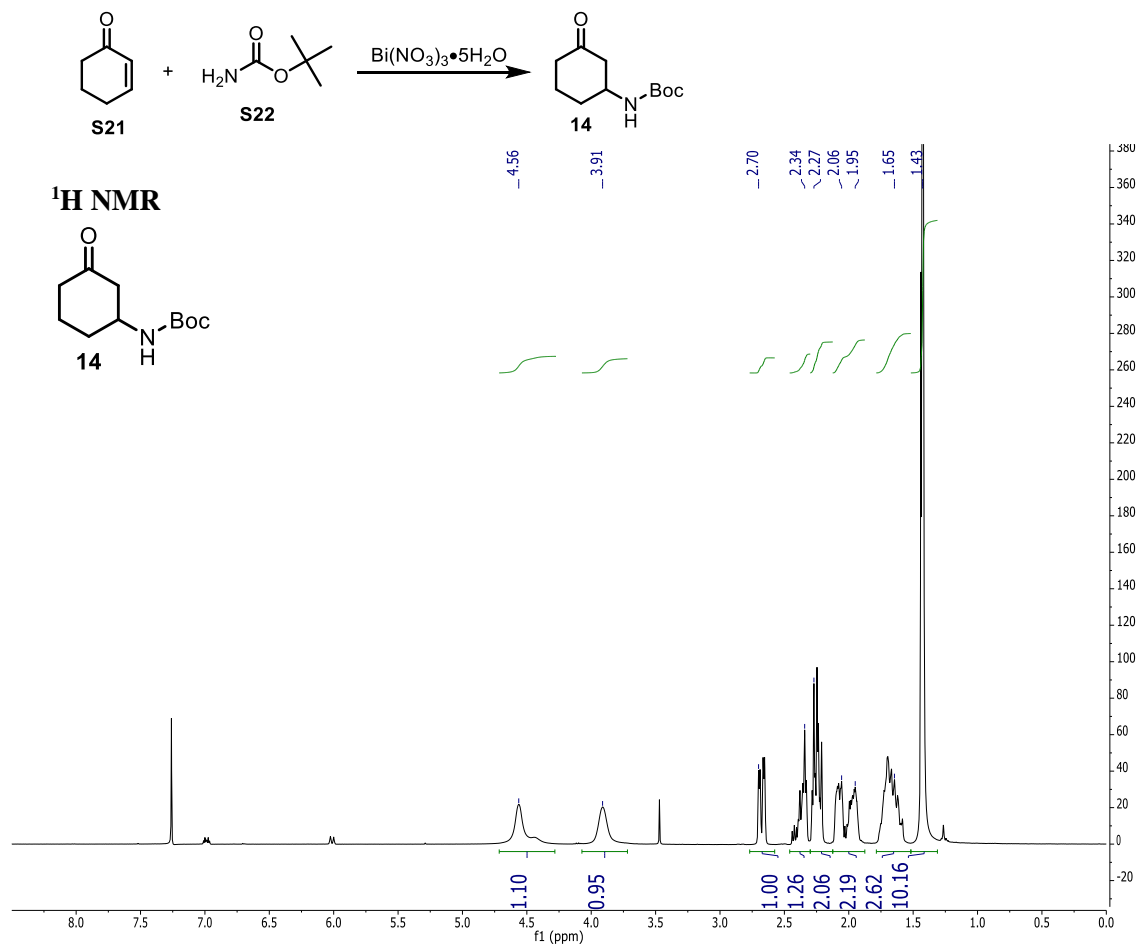

**Scheme S9: Variation of N-Protecting Group of 3-Amidocyclohexanones (General Procedure #10)**

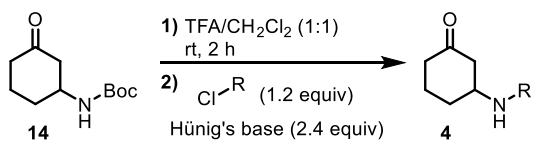

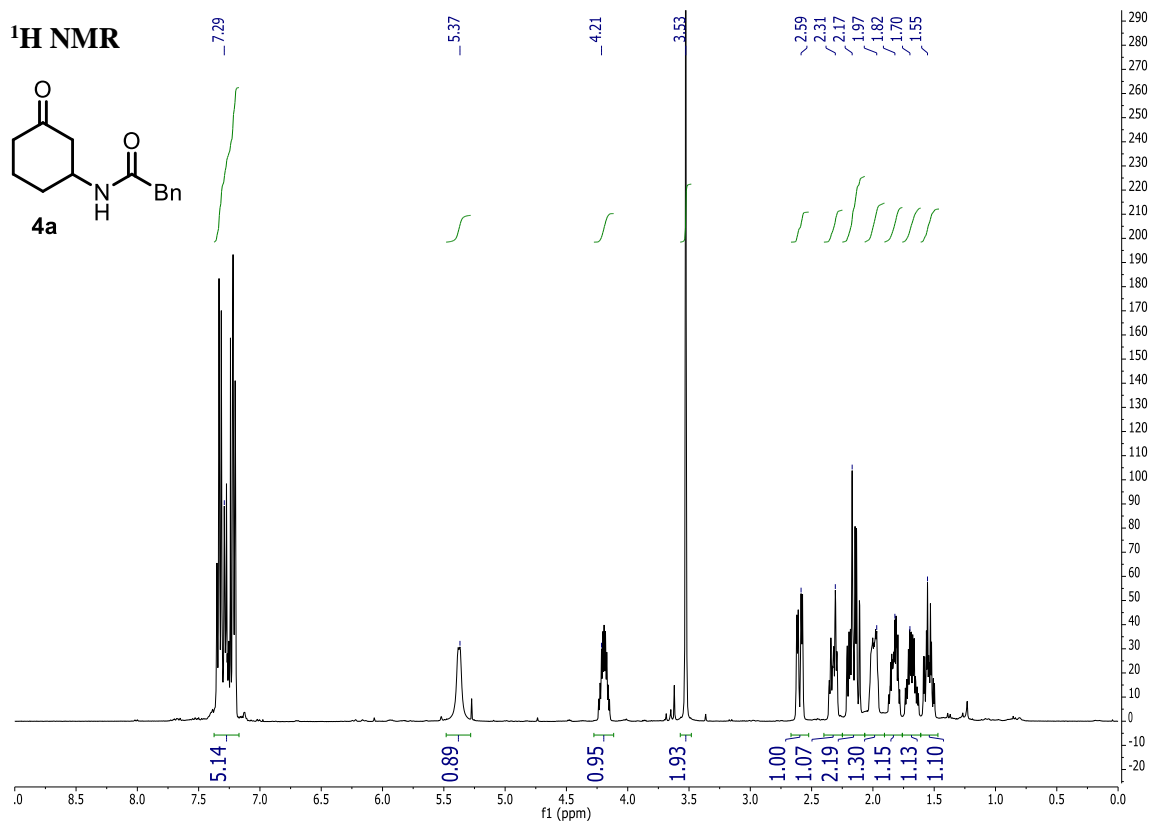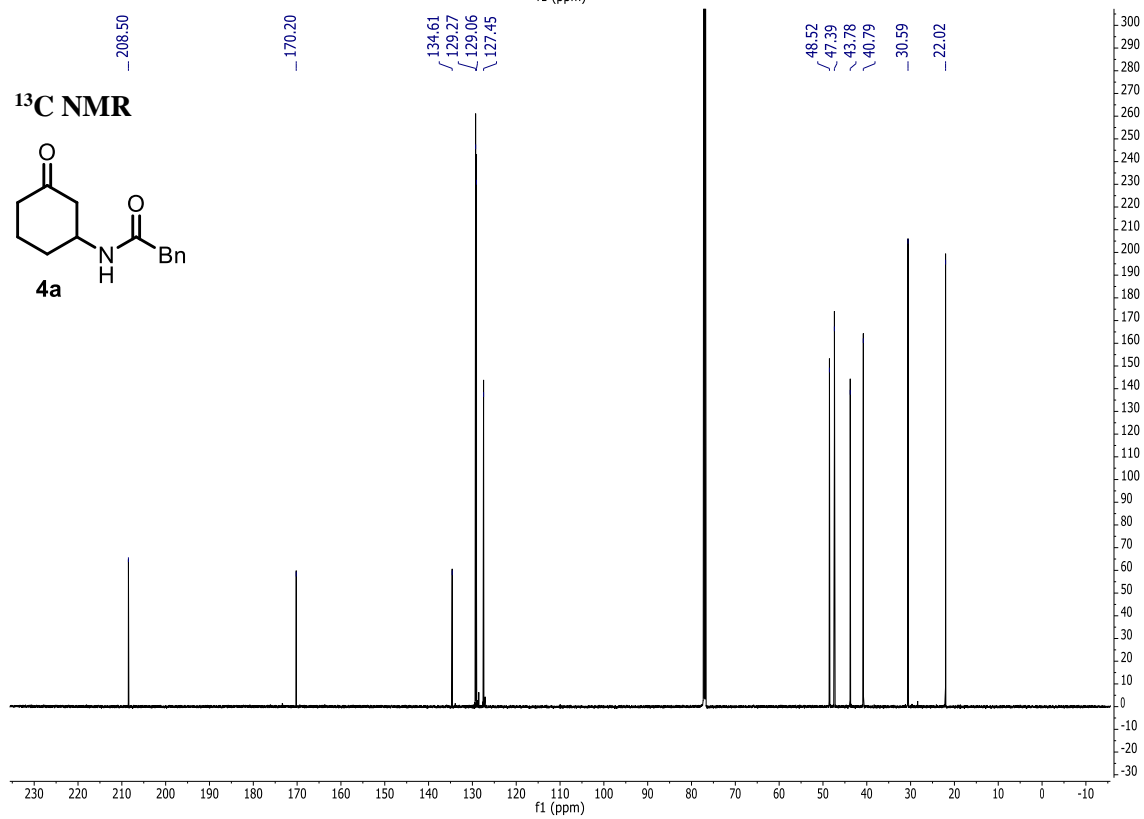



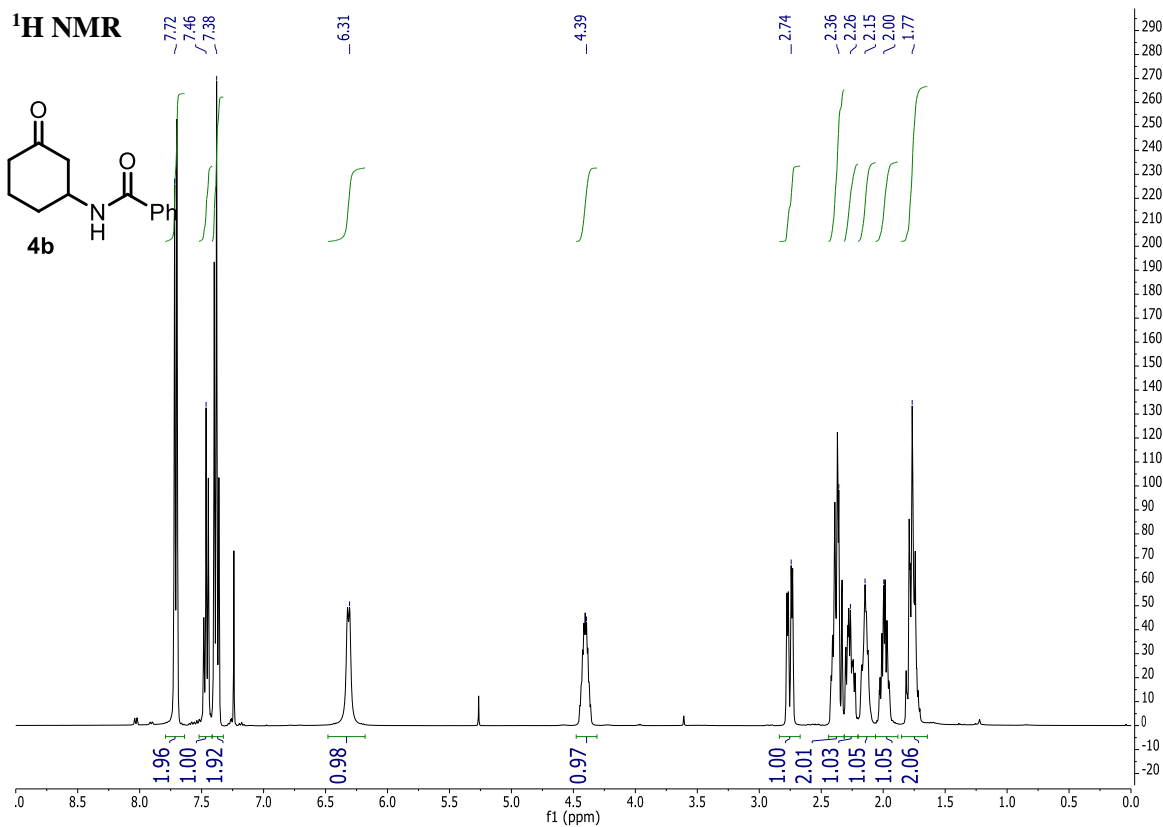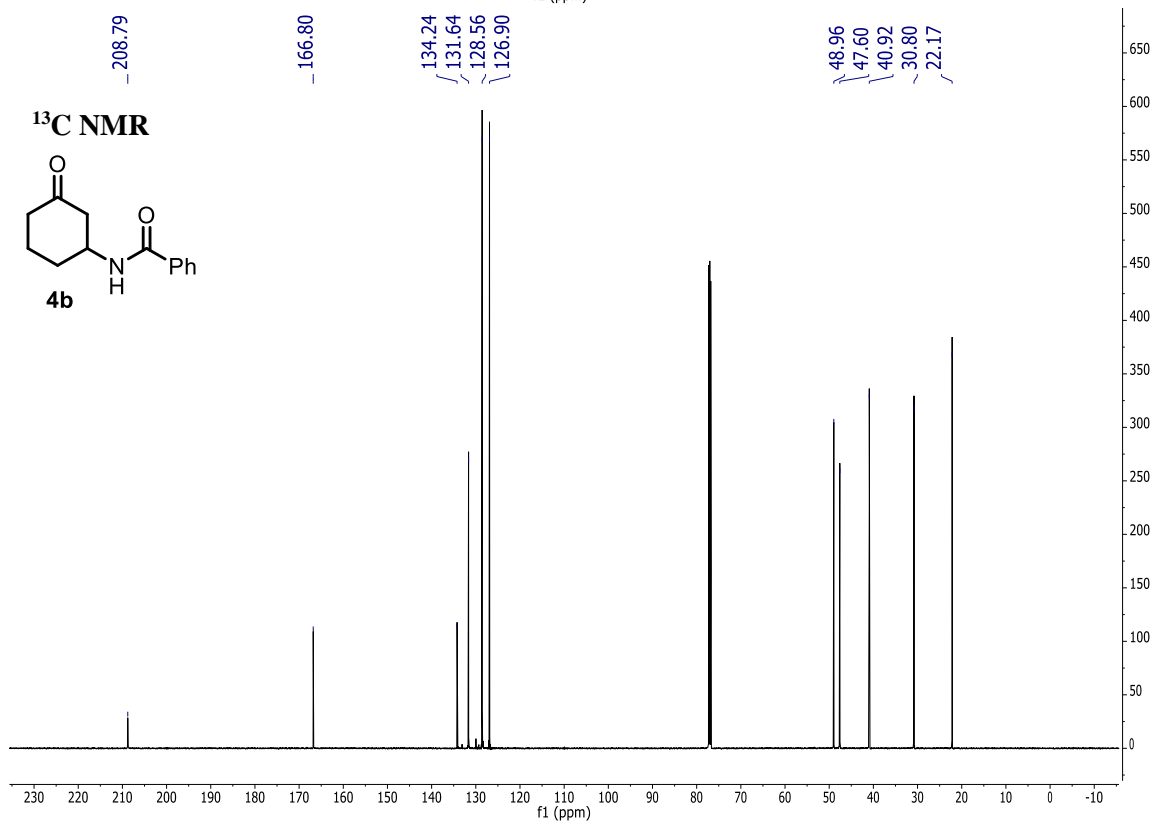

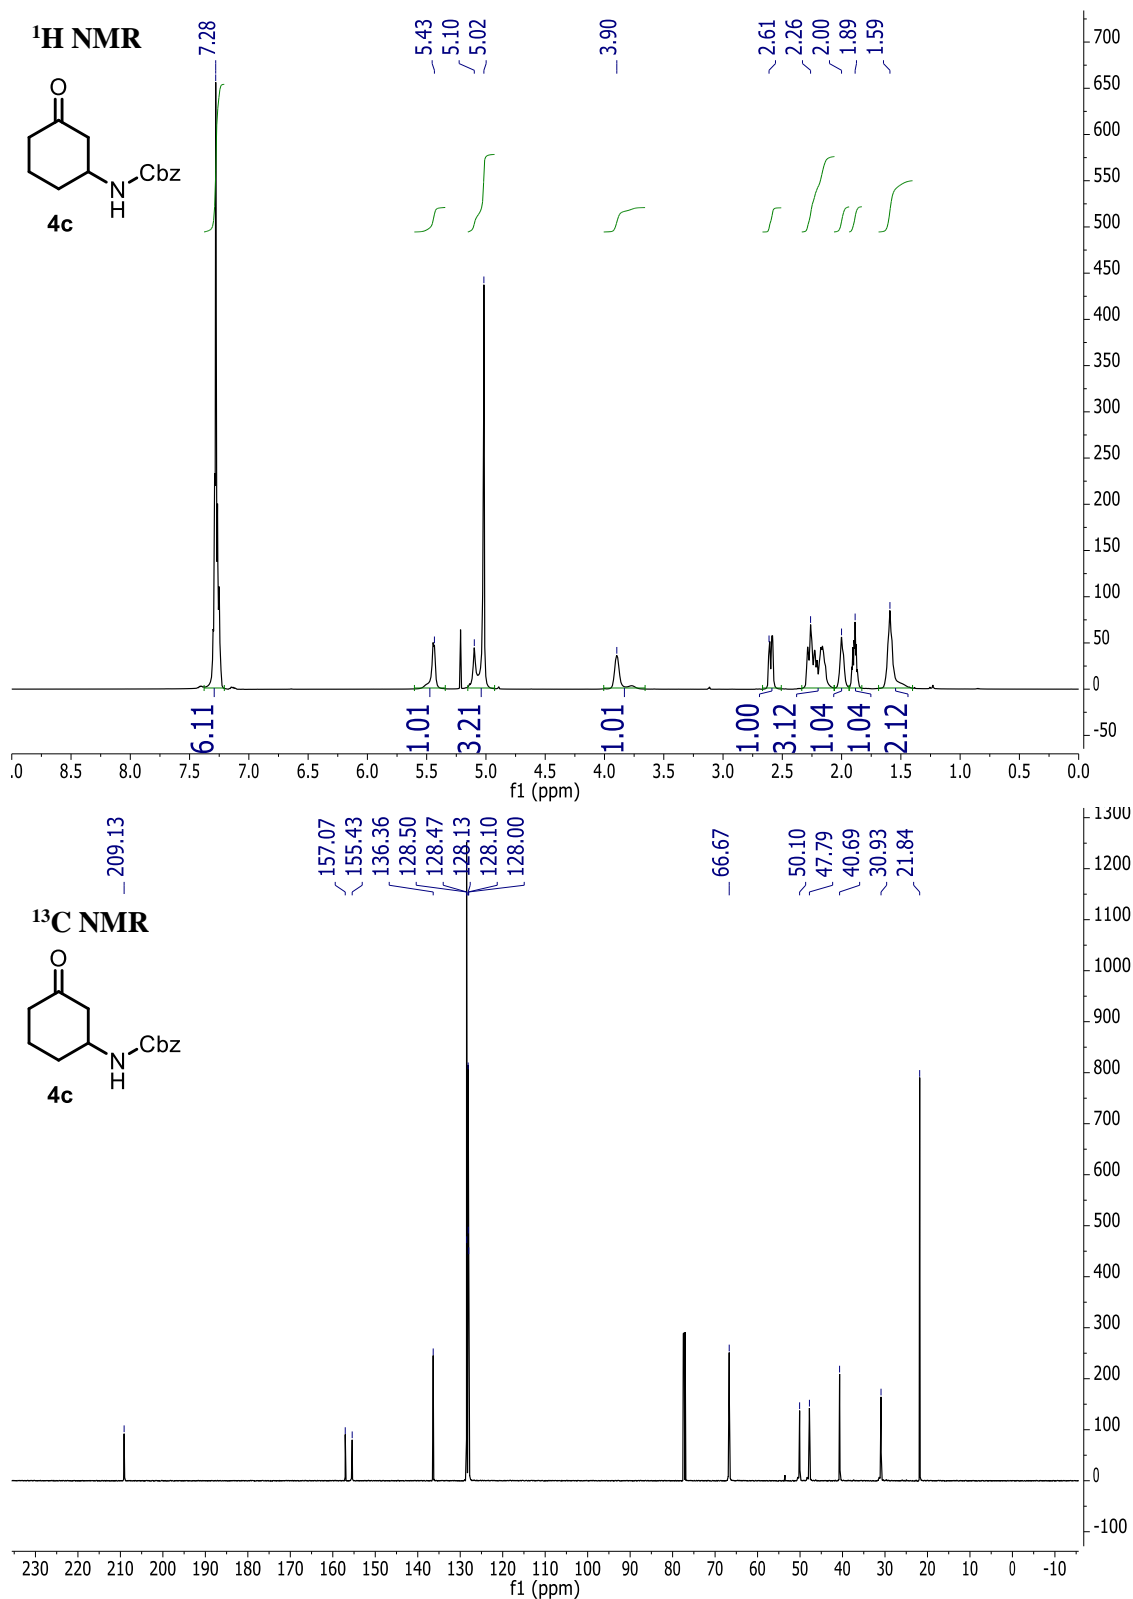

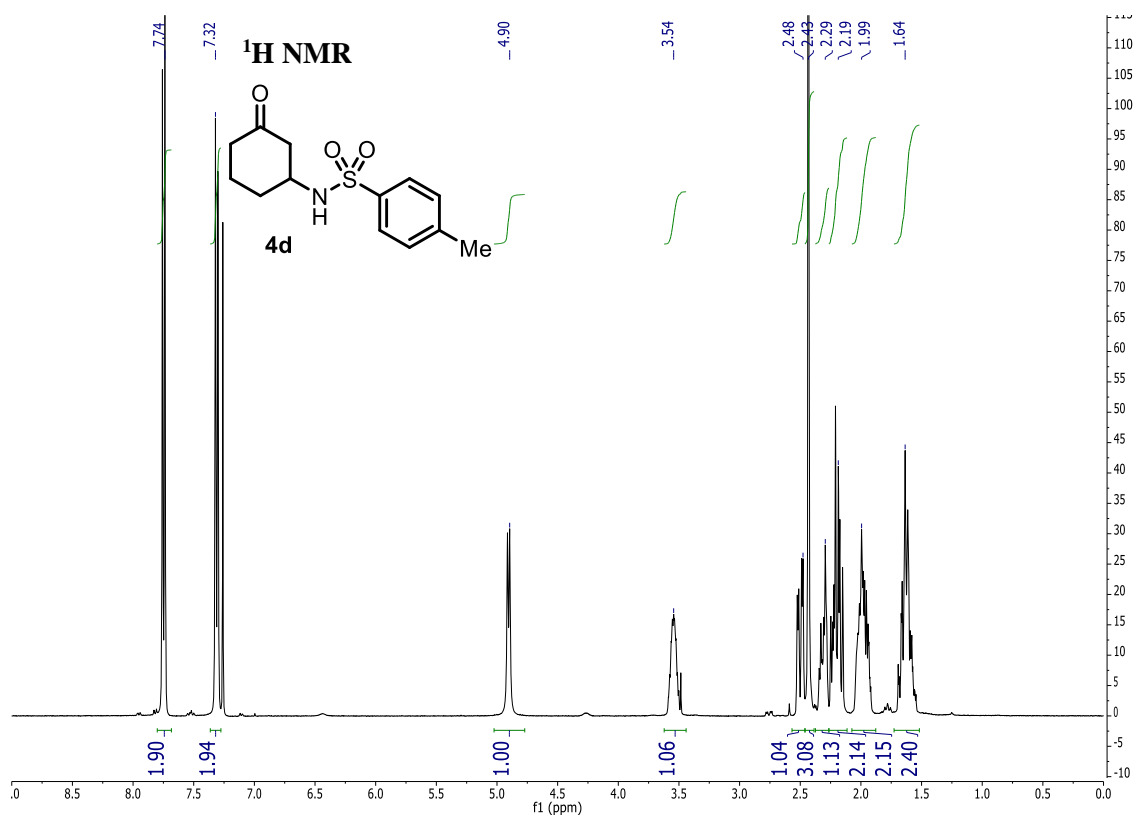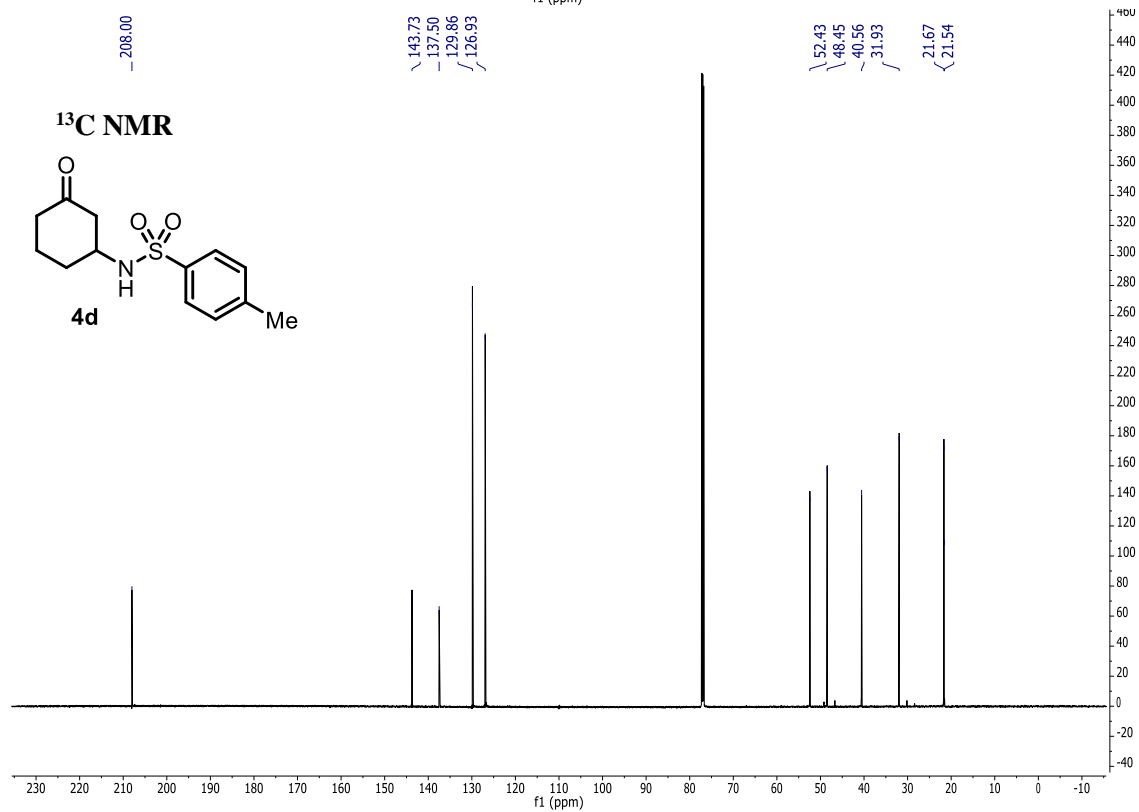

## 4. Purification and Characterization of Racemic Reductive Aminations

### *Trans*- and *cis*-3-((4-methoxyphenyl)amino)cyclohexyl)-2-phenylacetamide (**7a**)

#### Scheme S10: Synthesis of **7a** (General Procedure #11)

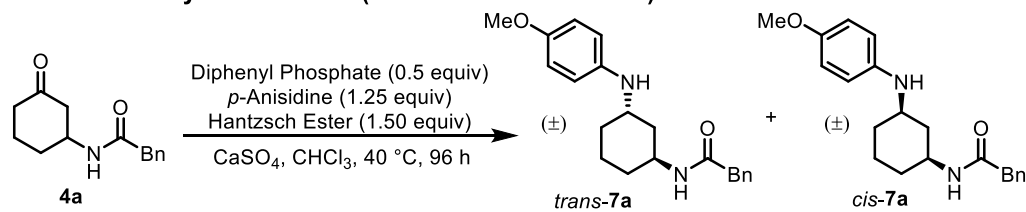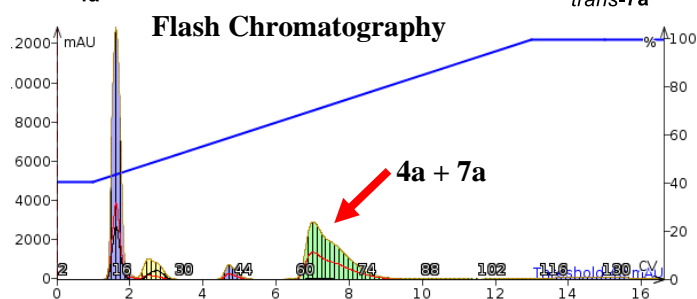

#### Preparative HPLC:

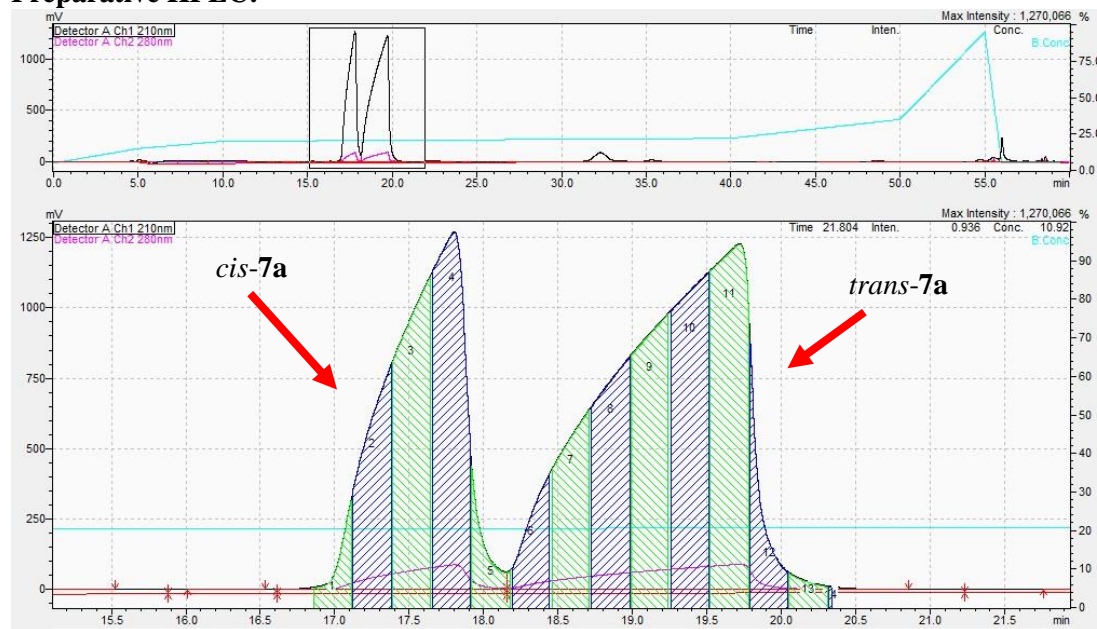

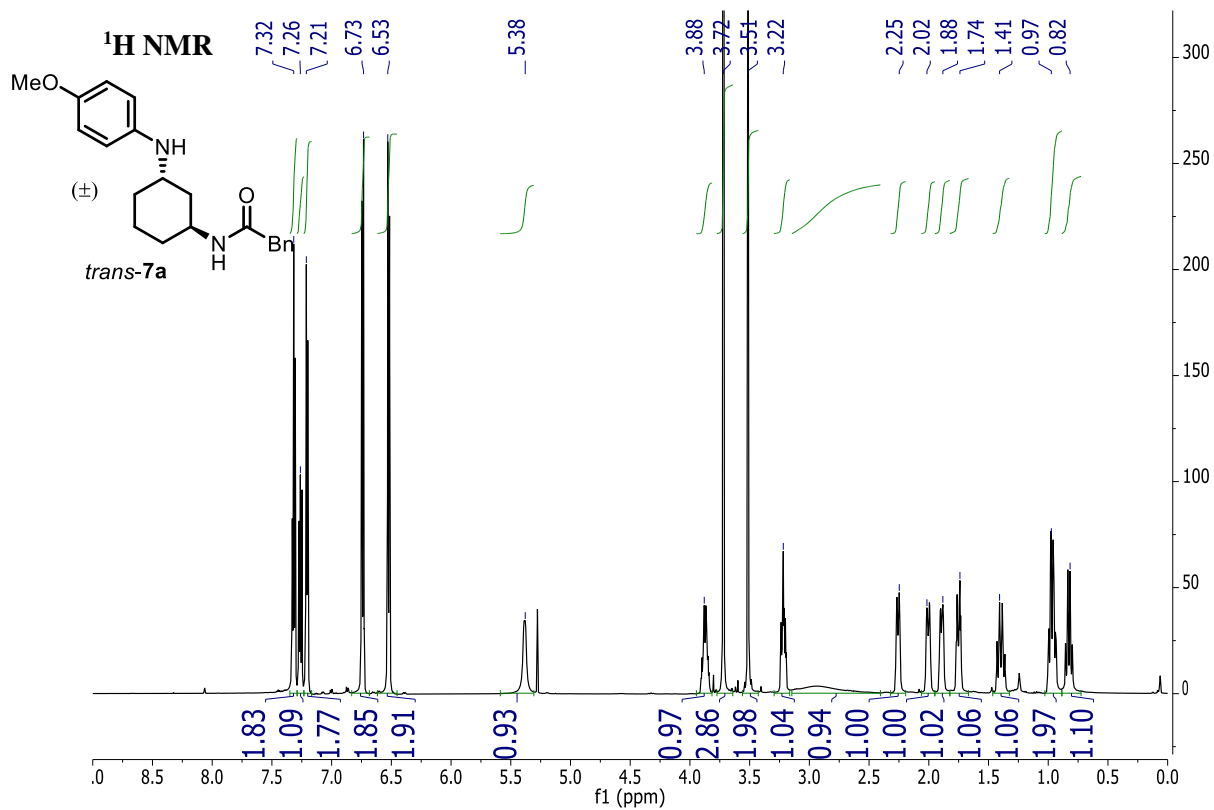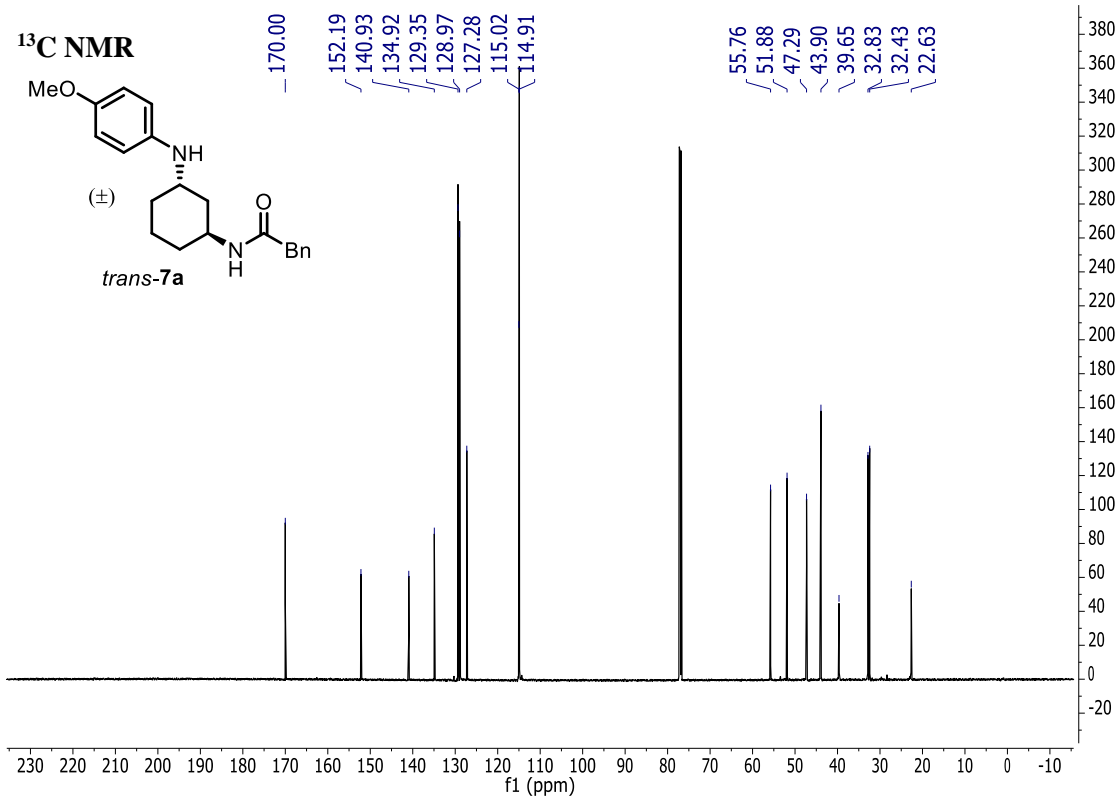

**<sup>1</sup>H-<sup>1</sup>H COSY  
NMR**

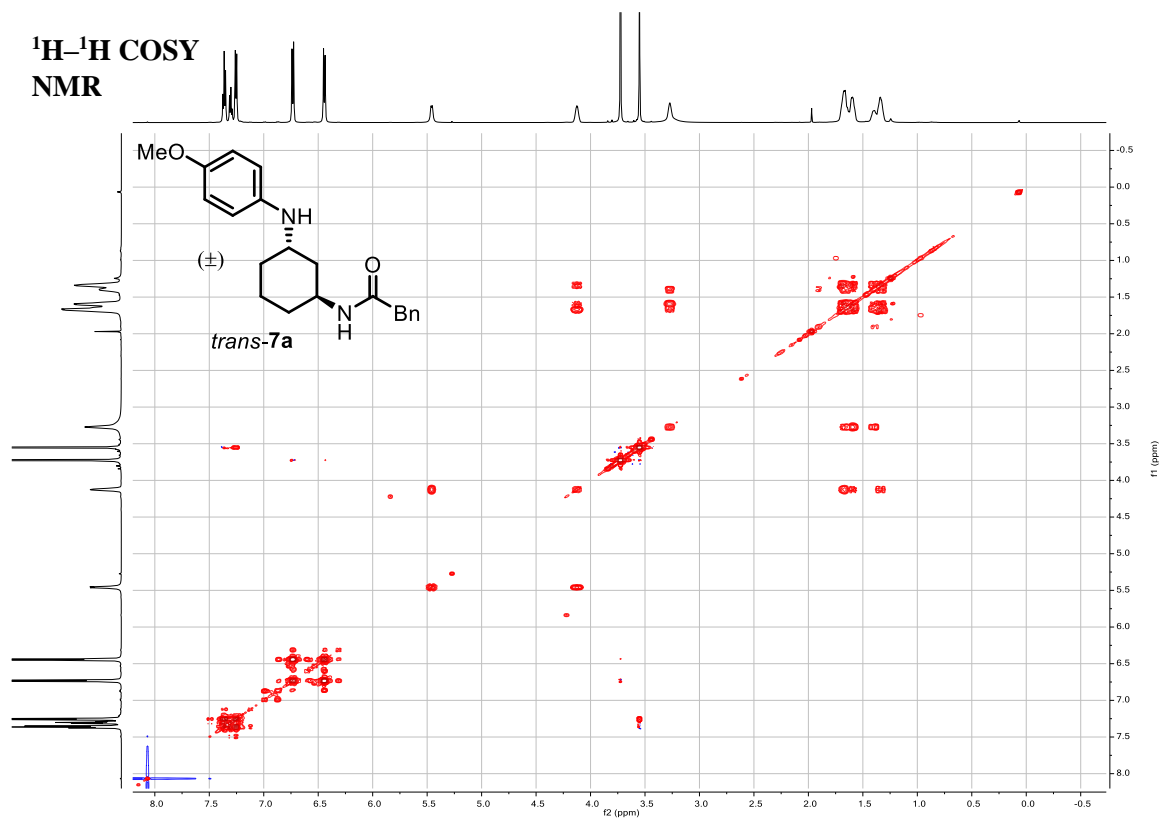

**<sup>1</sup>H-<sup>13</sup>C HSQC  
NMR**

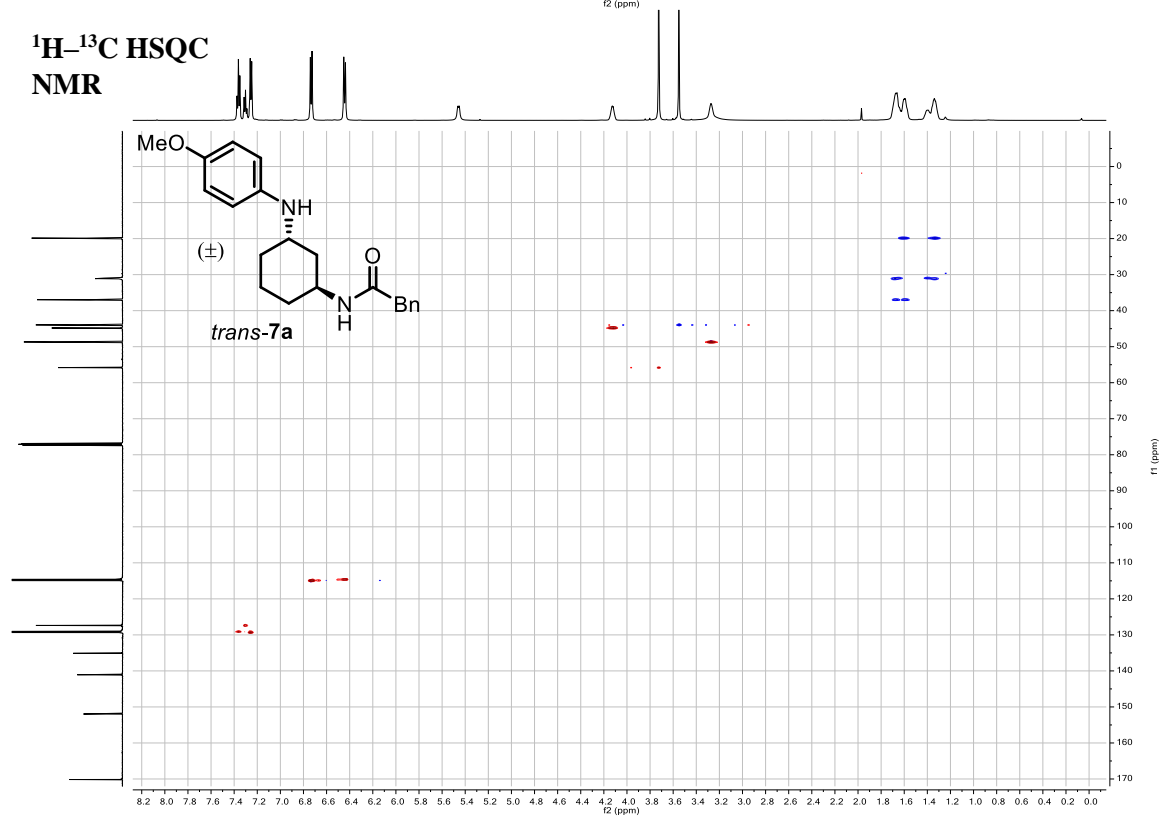

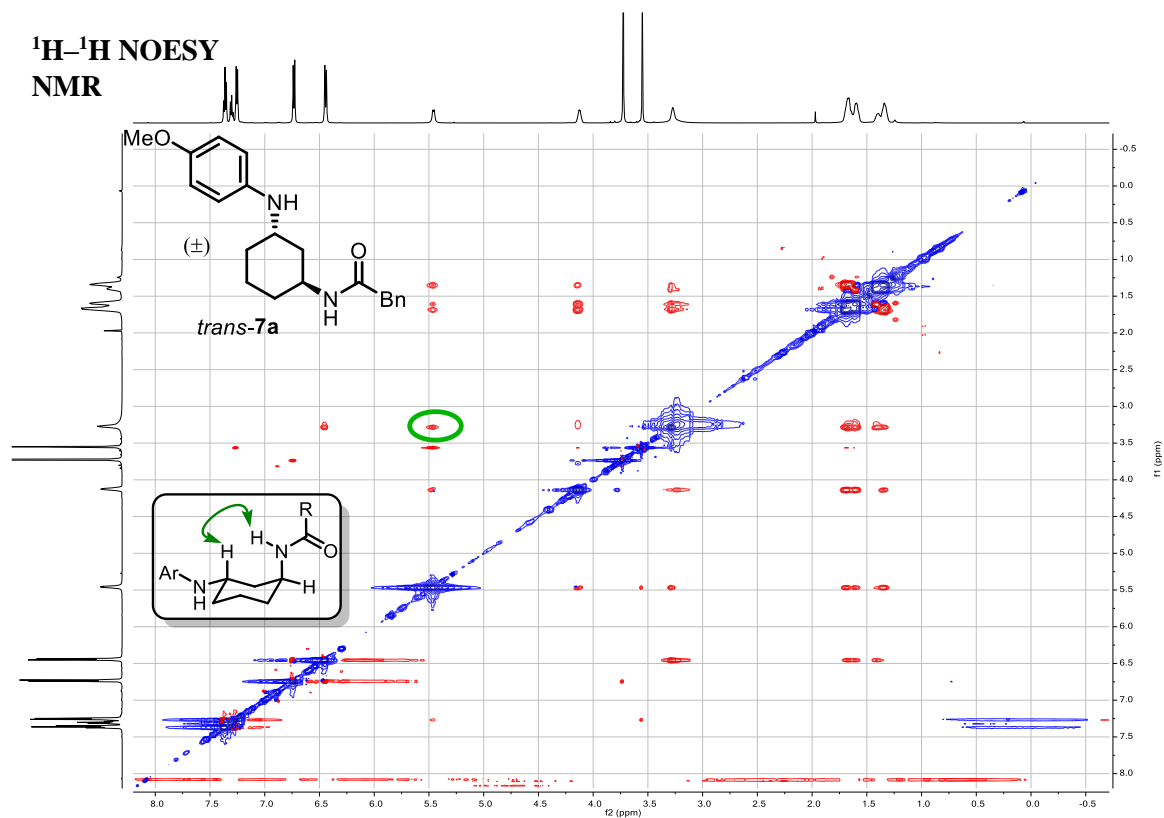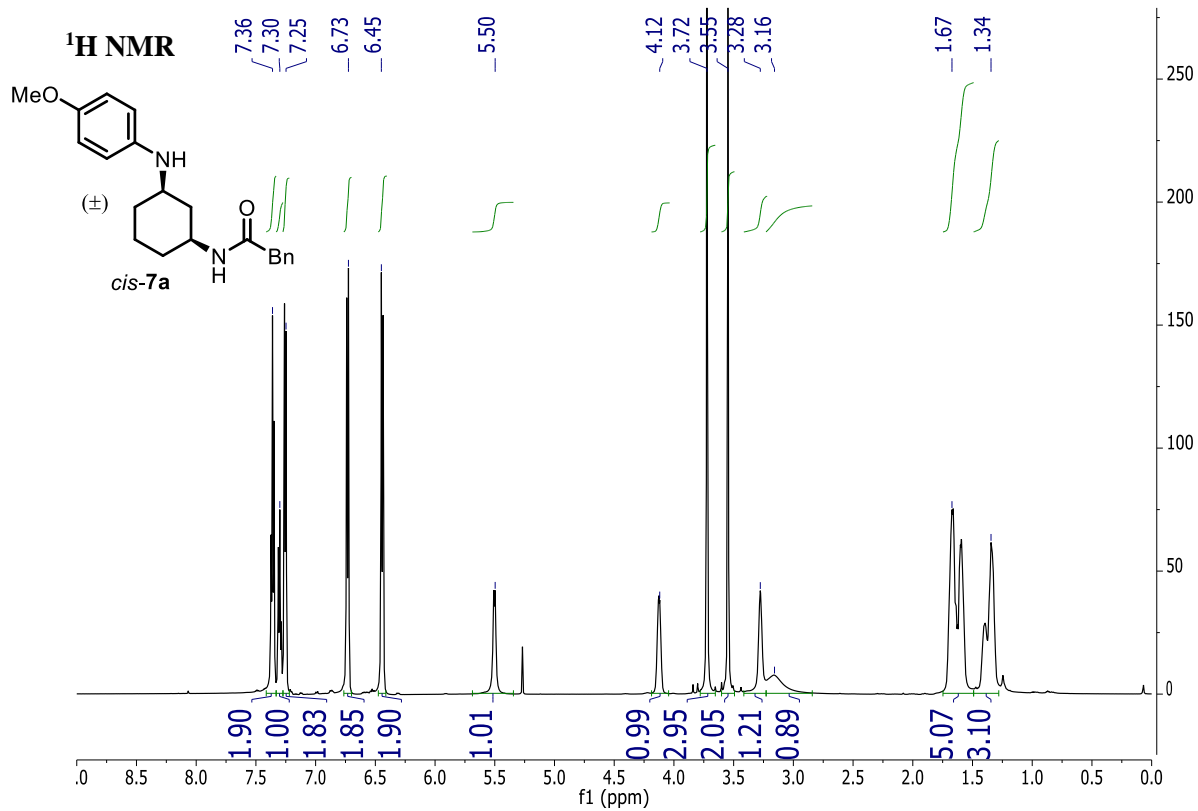

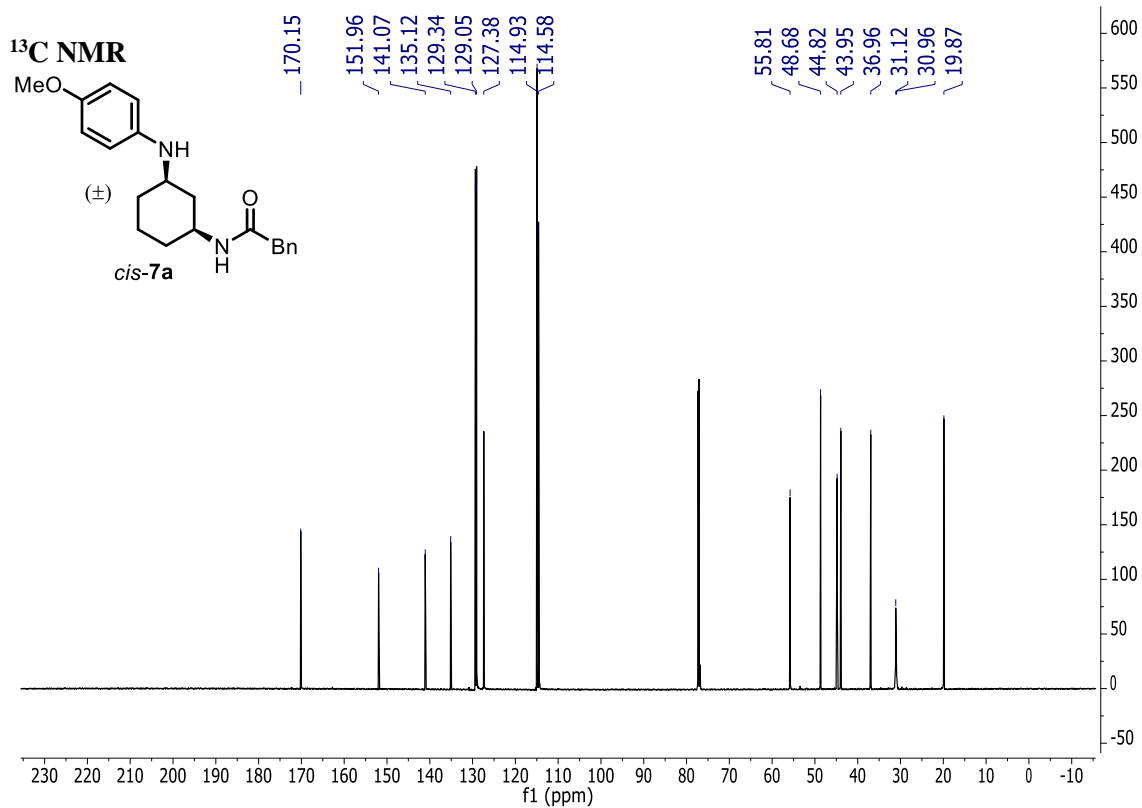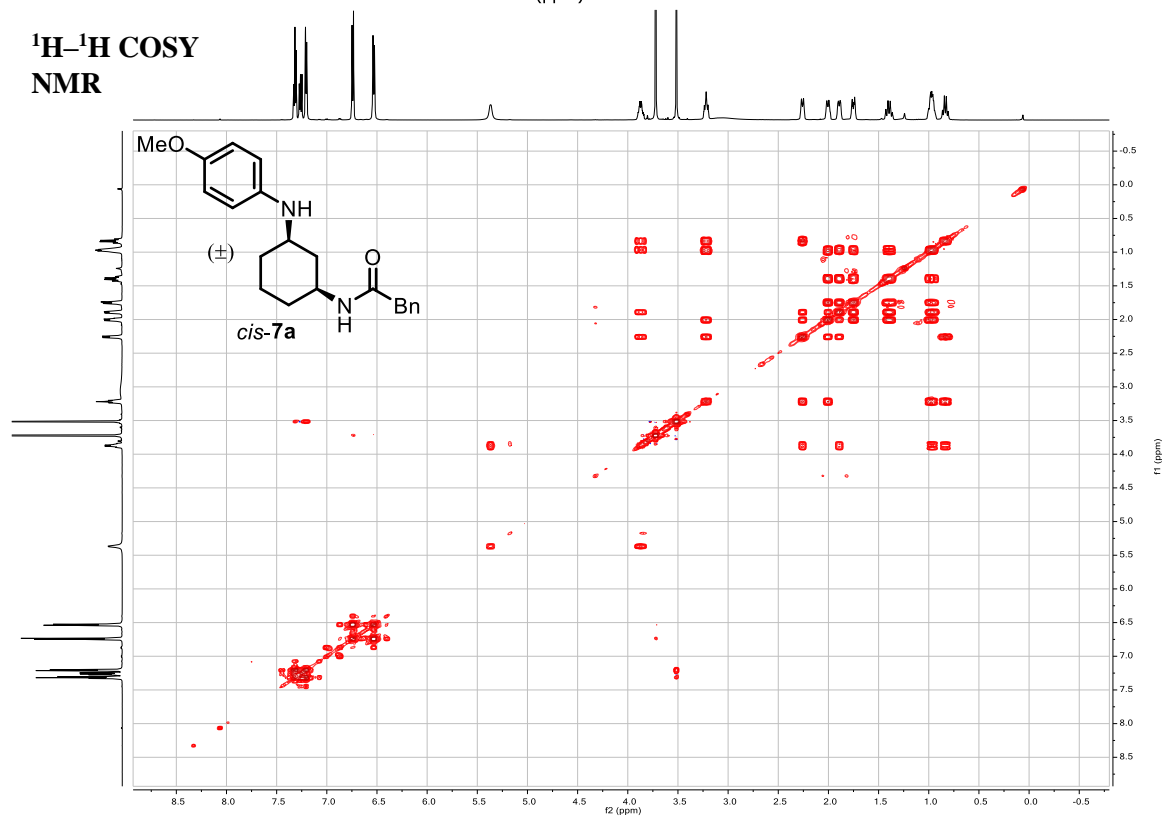



**$^1\text{H}$ - $^{13}\text{C}$  HSQC  
NMR**

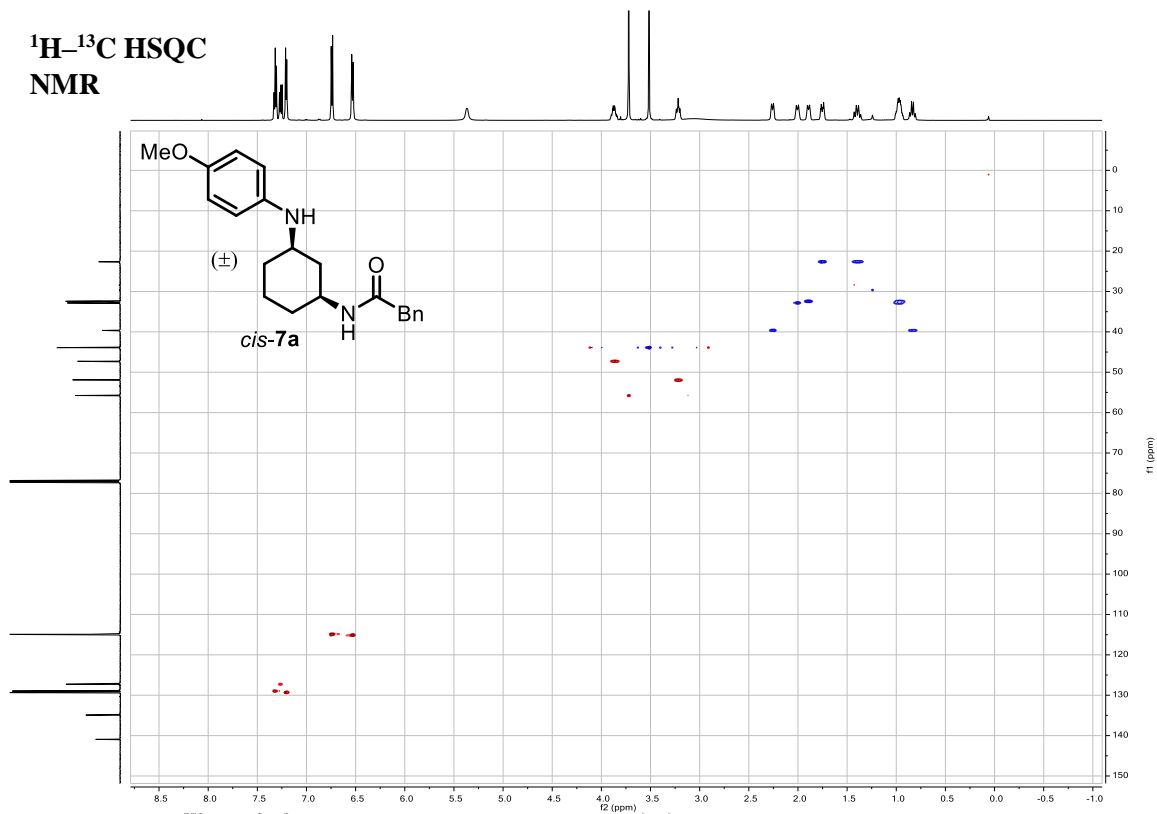

**$^1\text{H}$ - $^1\text{H}$   
NOESY  
NMR**

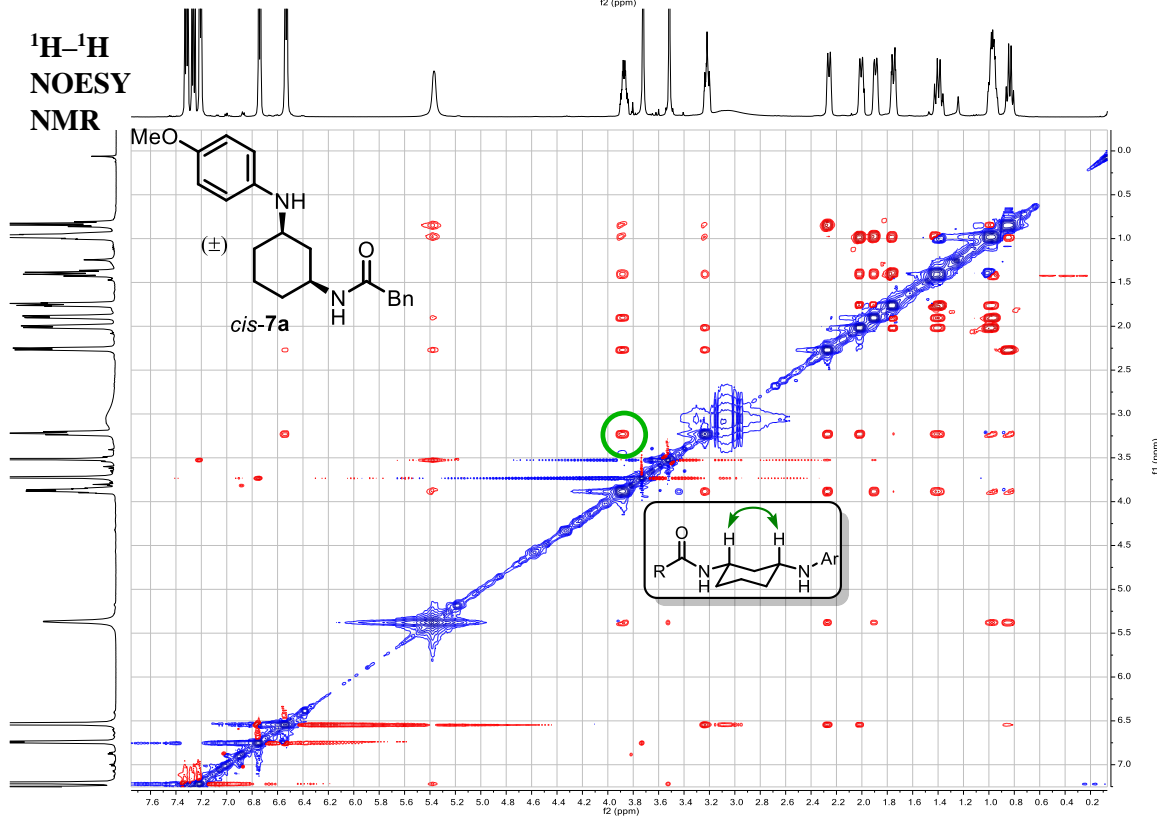

**Trans- and Cis-N-(3-((4-methoxyphenyl)amino)cyclohexyl)benzamide (7b).**

**Scheme S11: Synthesis 7b (General Procedure #11)**

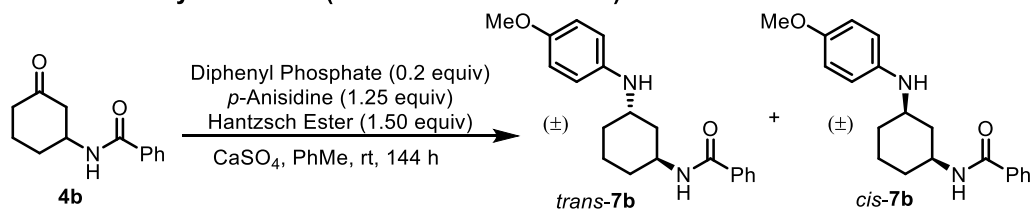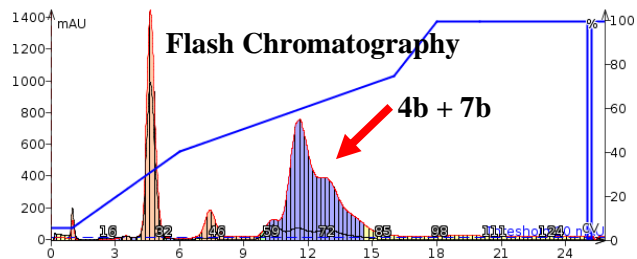

**Preparative HPLC:**

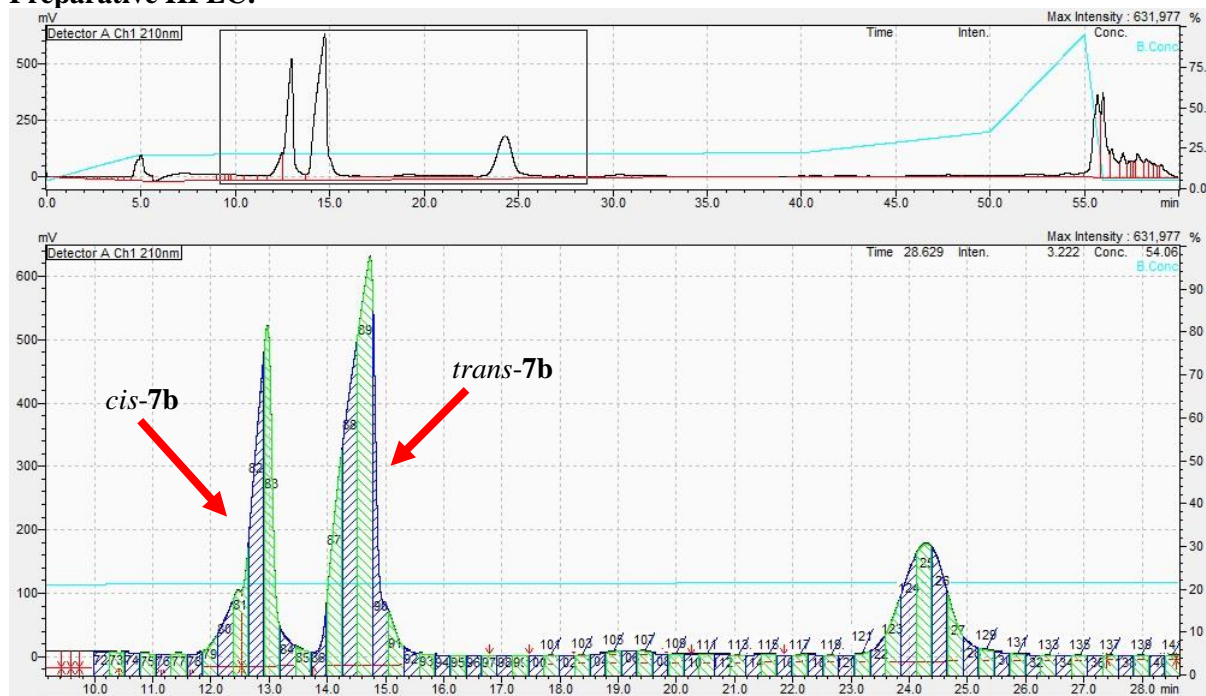

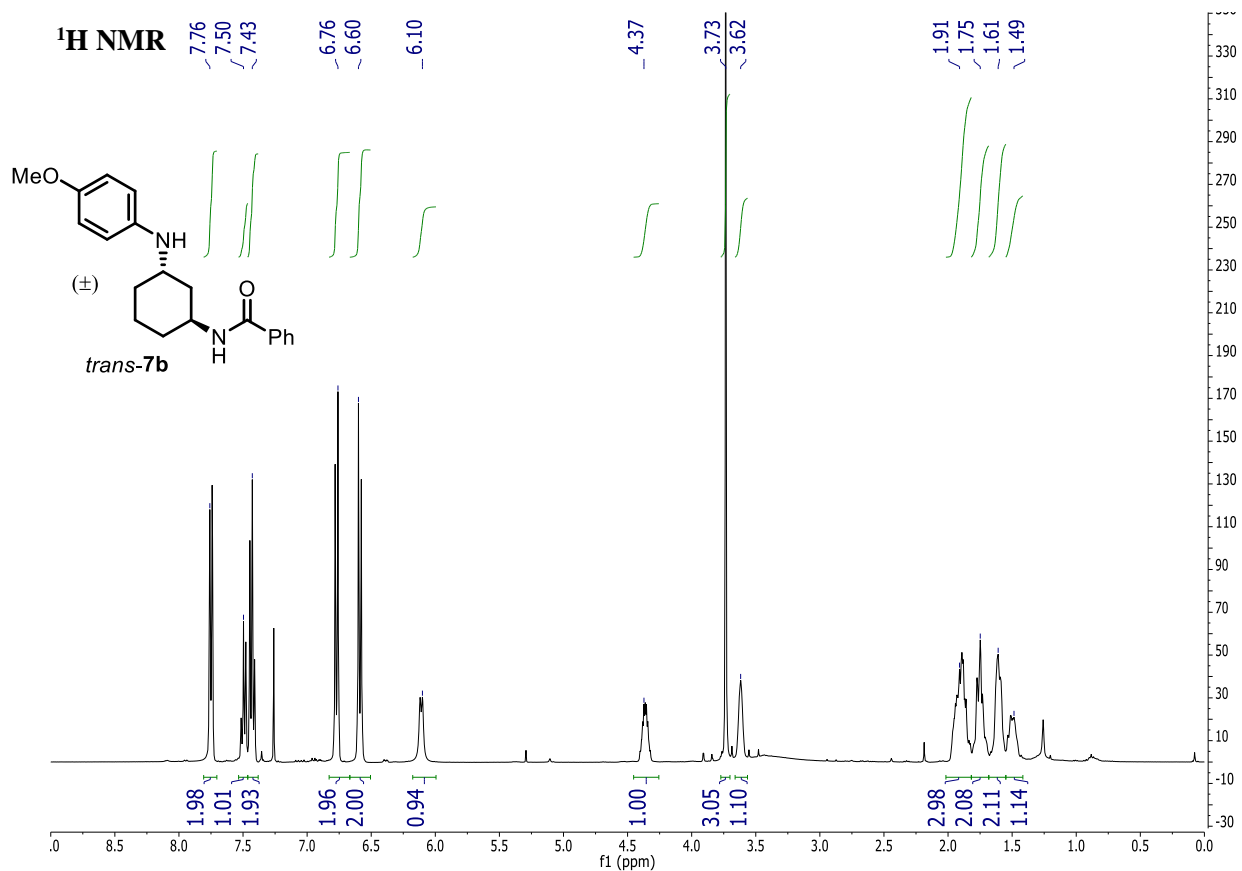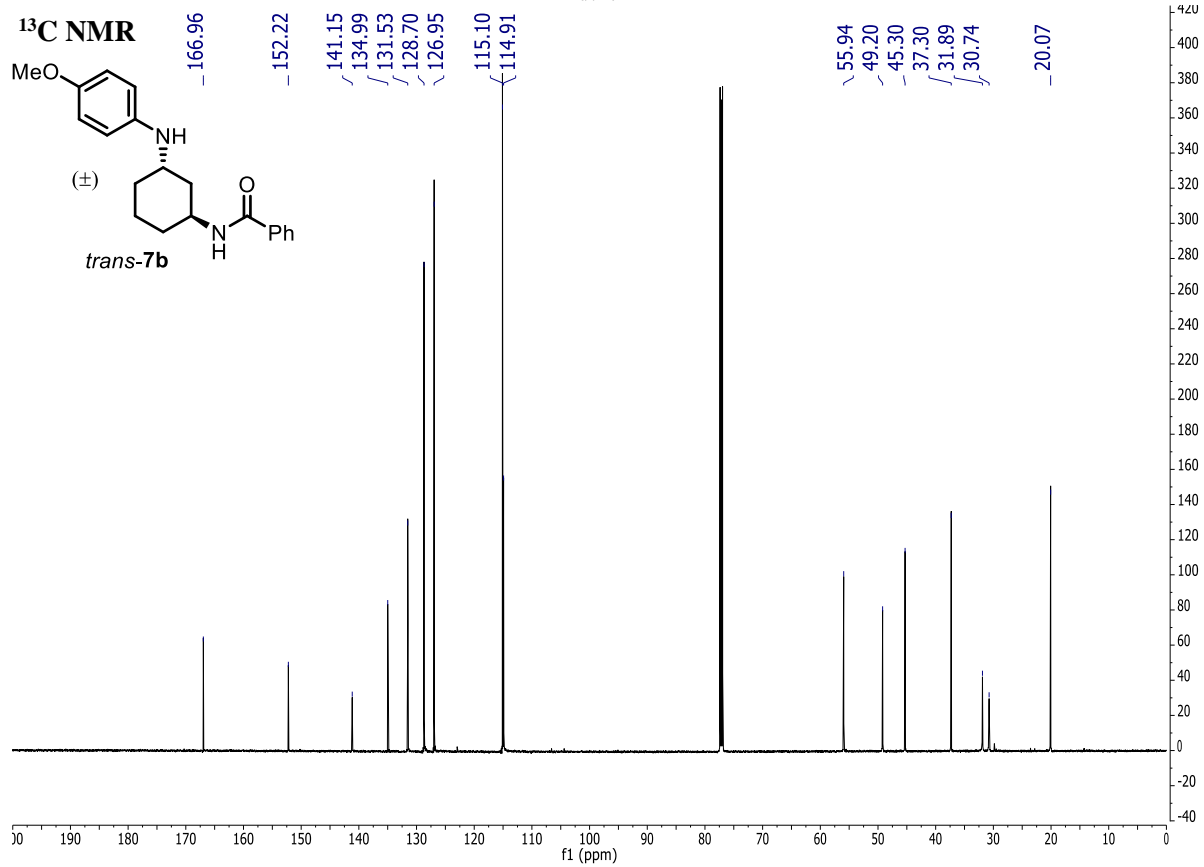

**$^1\text{H}$ - $^1\text{H}$  COSY  
NMR**

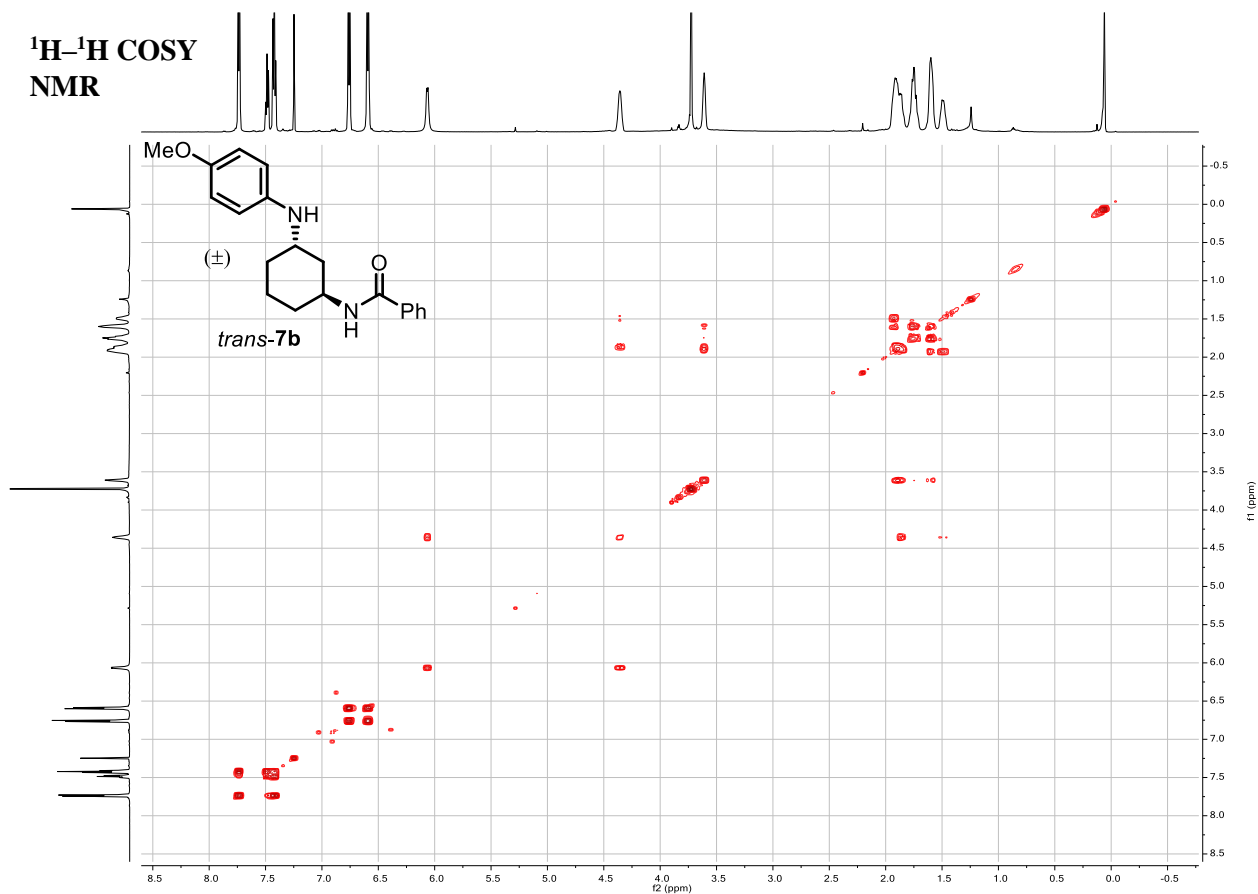

**$^1\text{H}$ - $^{13}\text{C}$  HSQC  
NMR**

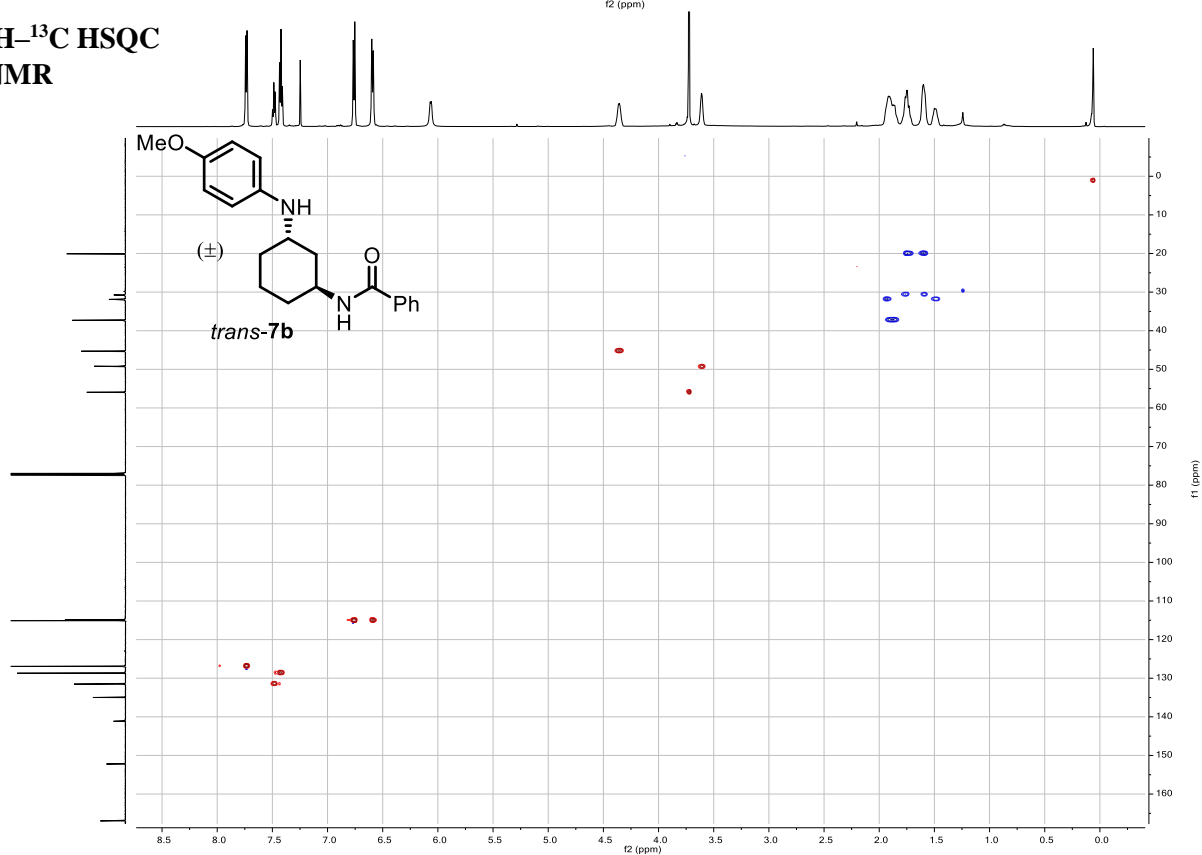

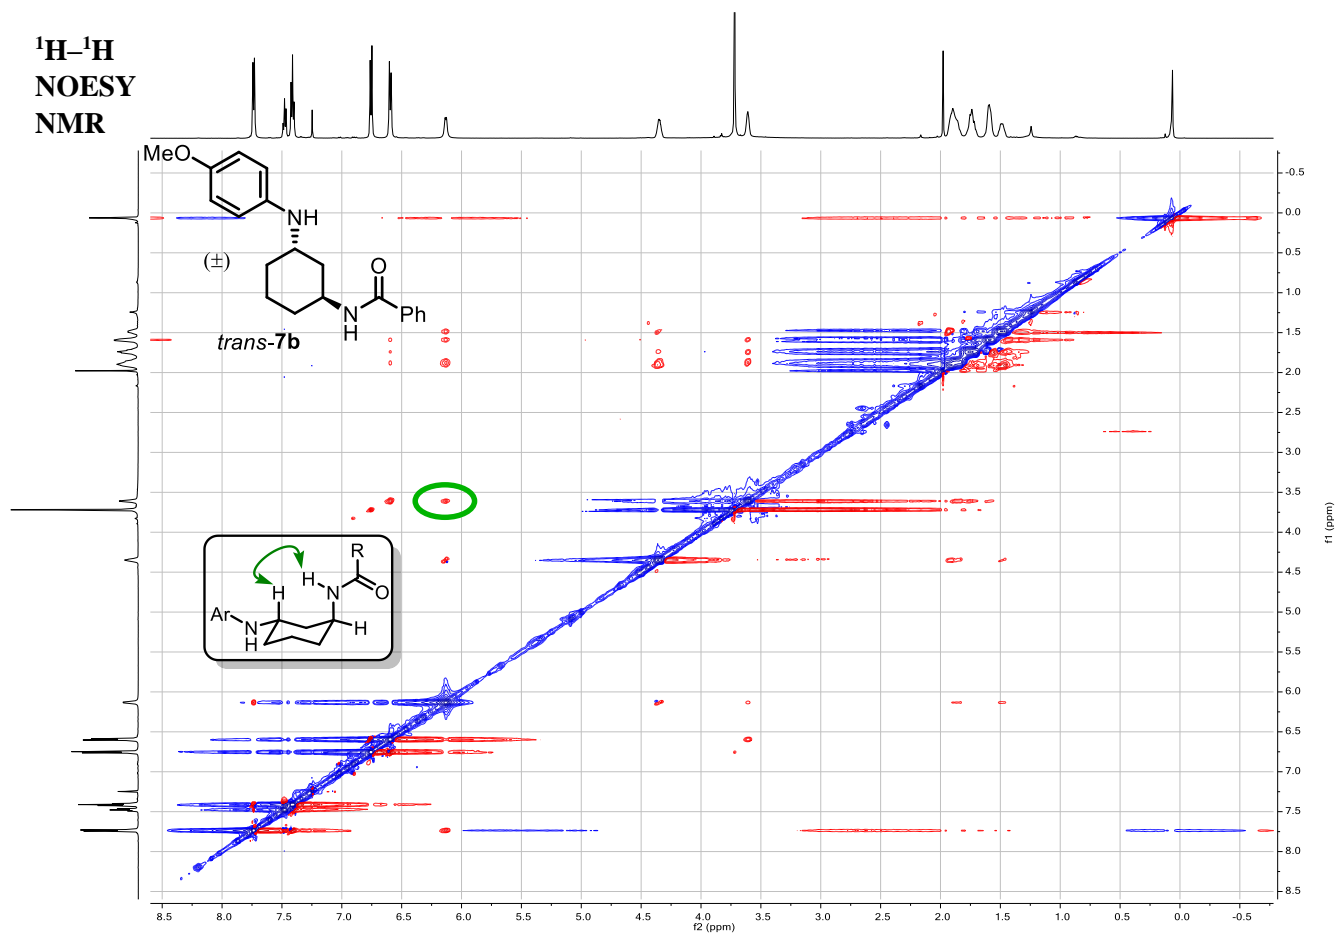

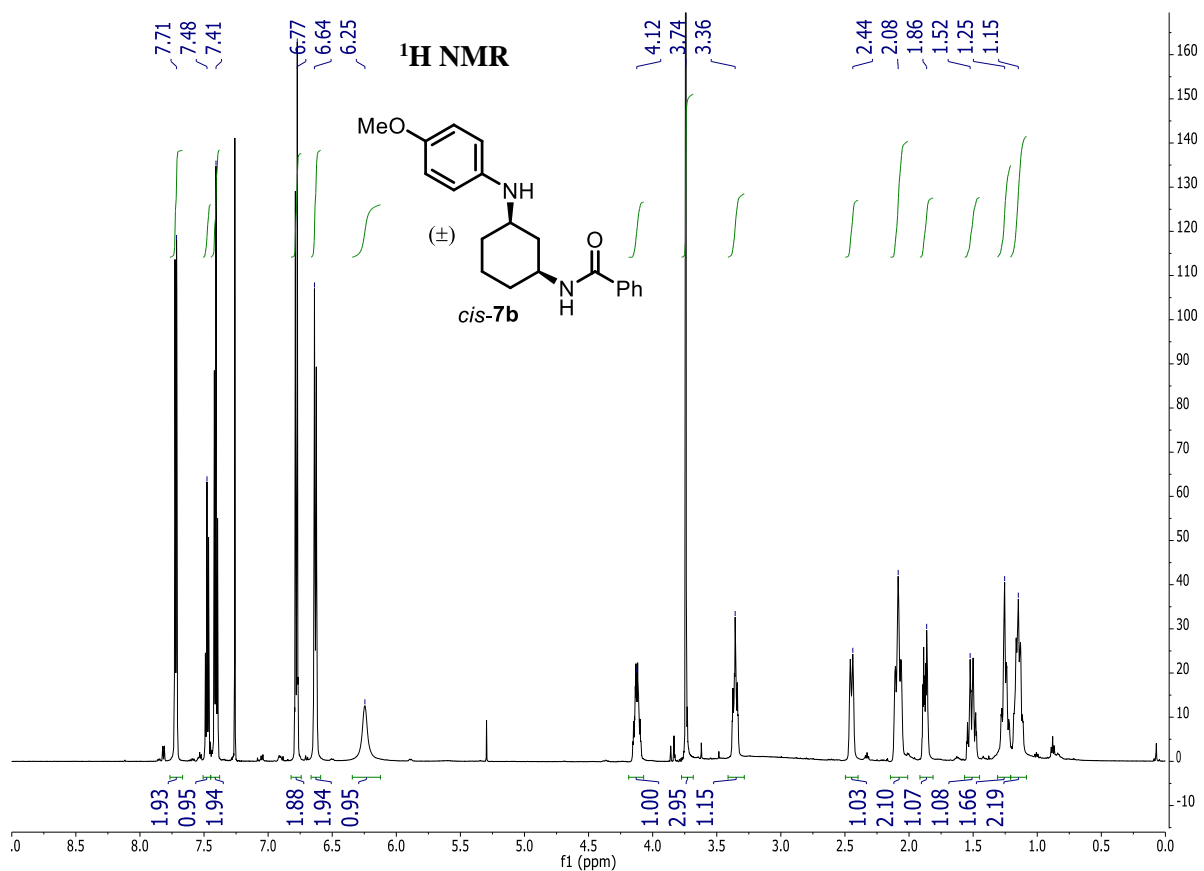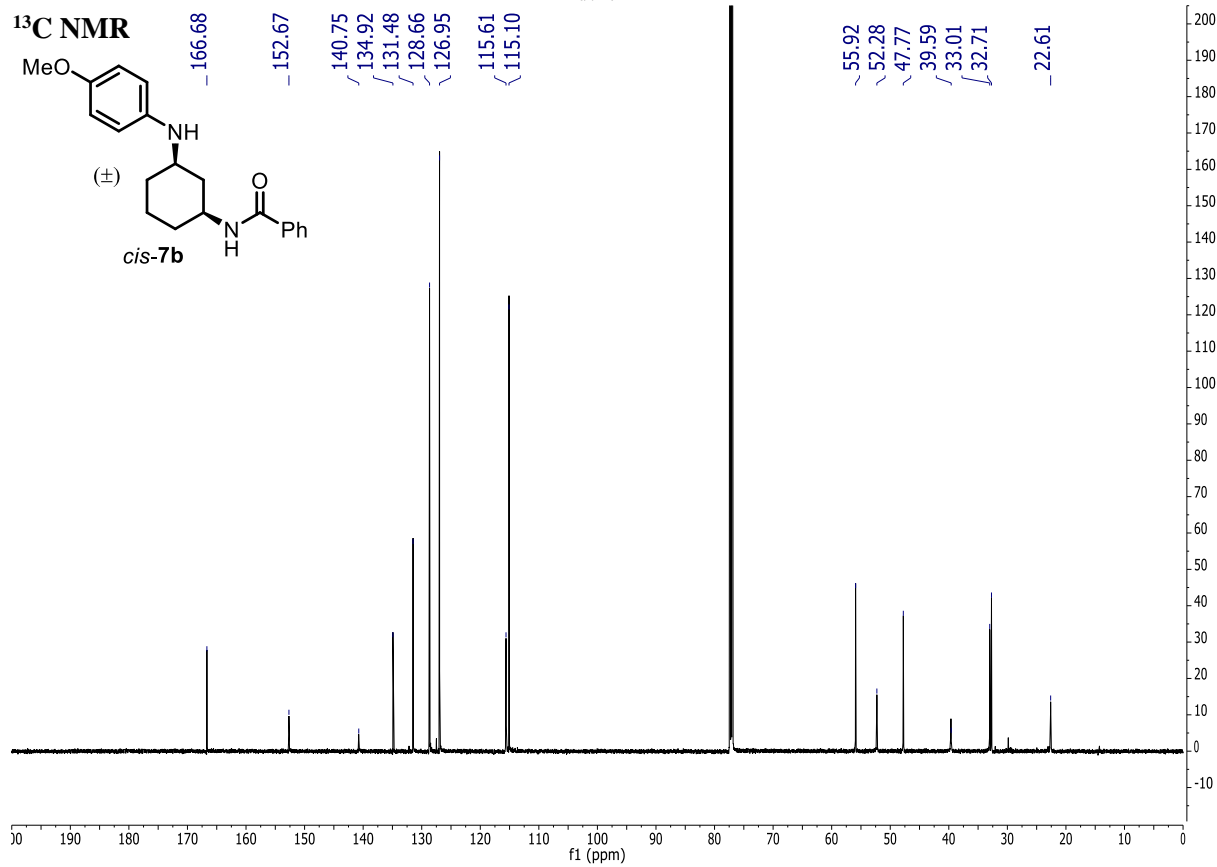

**<sup>1</sup>H-<sup>1</sup>H COSY  
NMR**

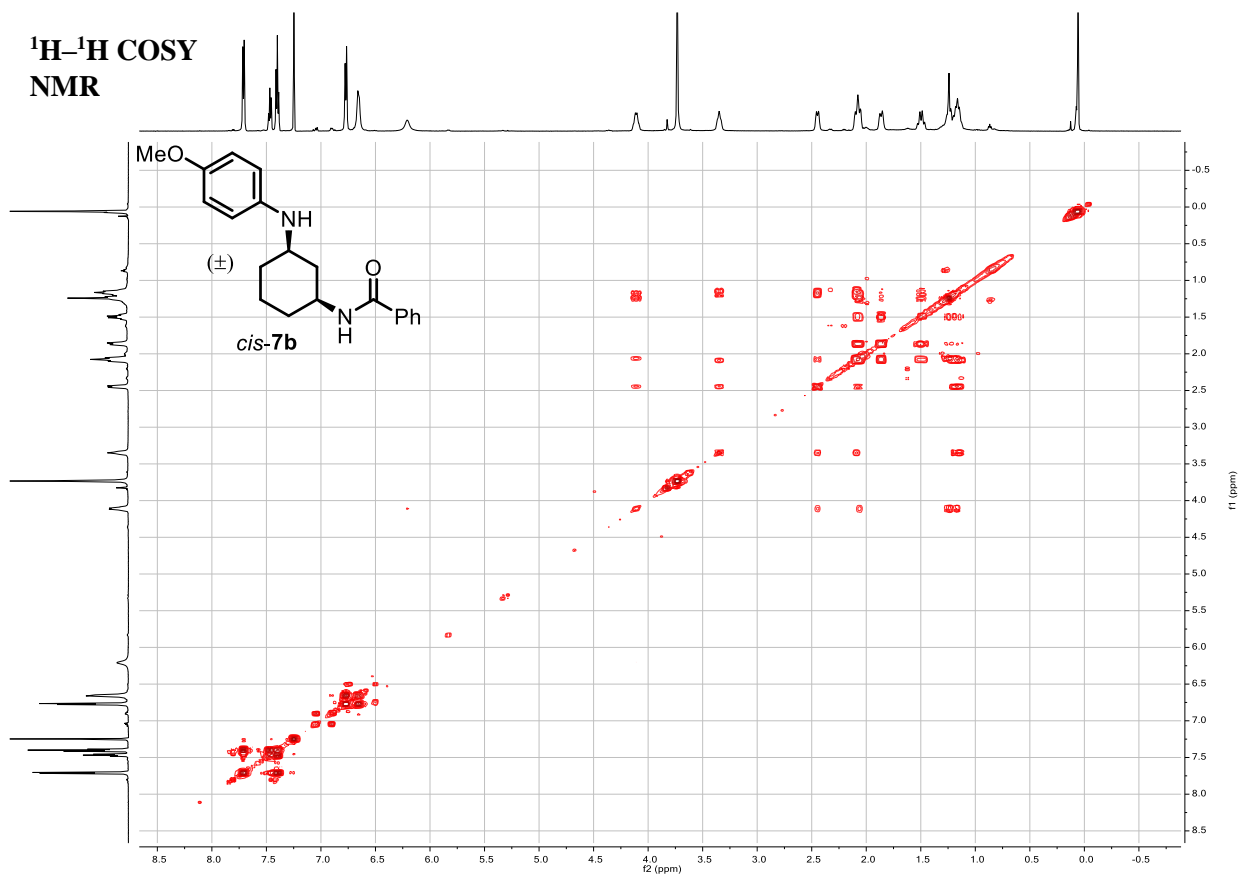

**<sup>1</sup>H-<sup>13</sup>C HSQC  
NMR**

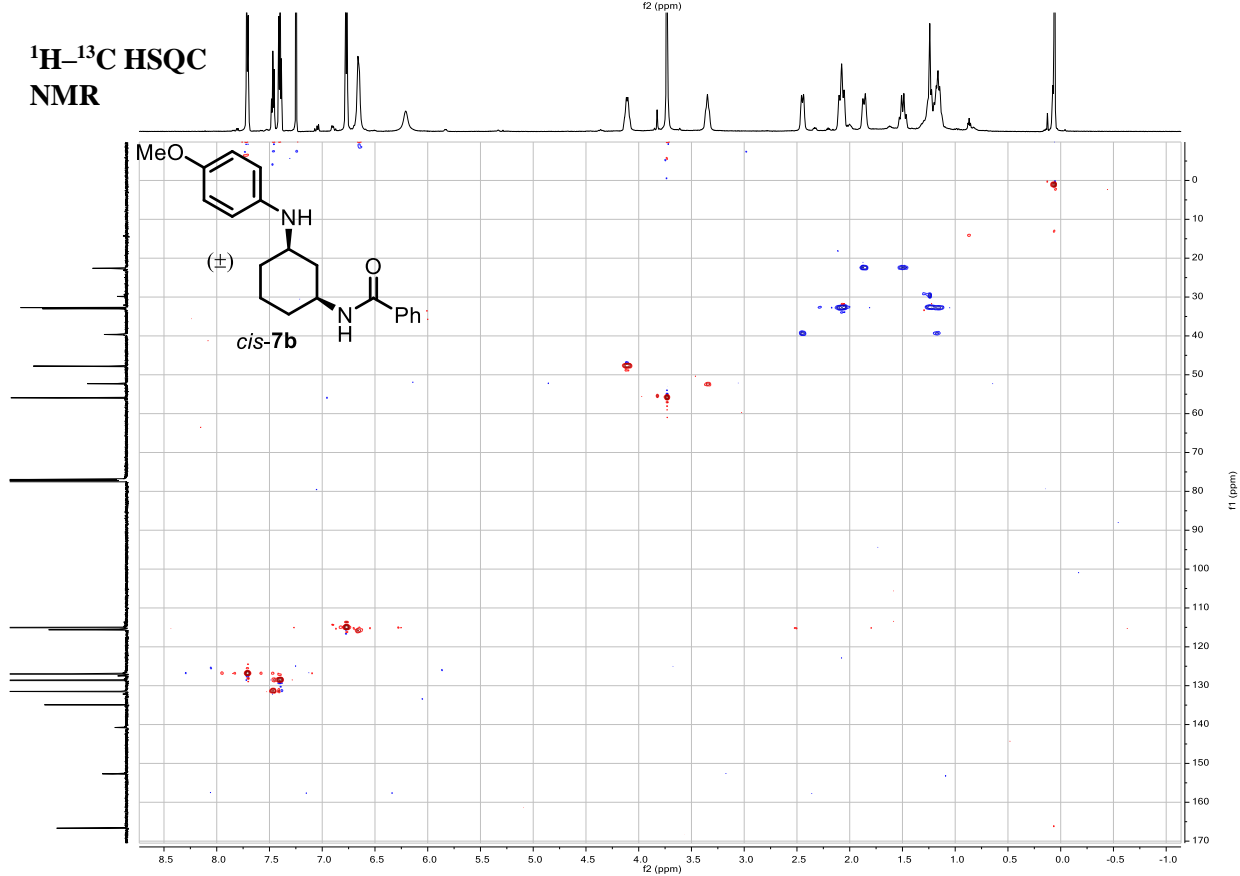

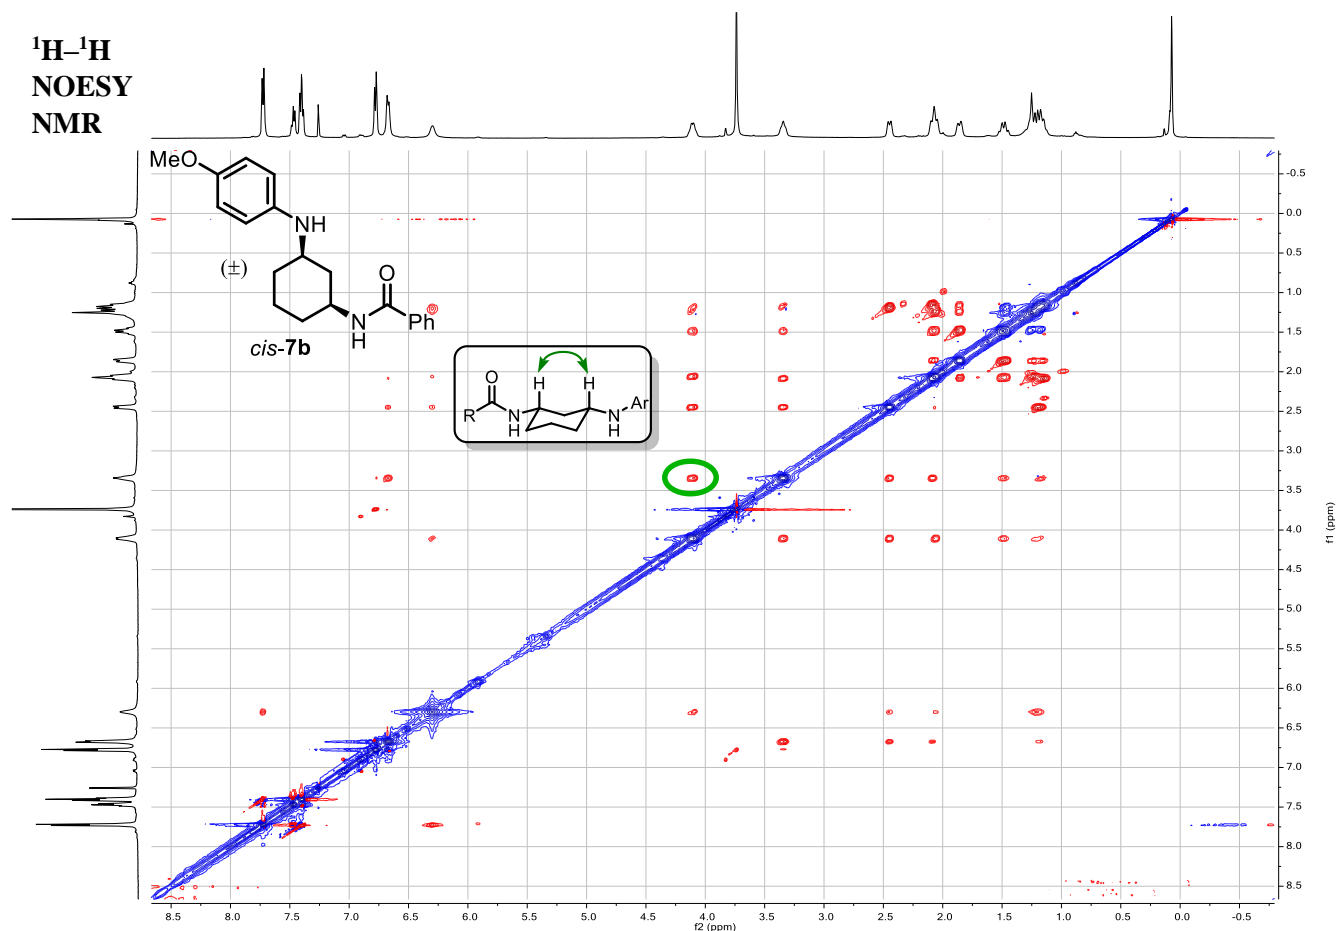

***Trans*- and *cis*-Benzyl (3-((4-methoxyphenyl)amino)cyclohexyl)carbamate (7c)**  
**Scheme S12: Synthesis 7c (General Procedure #11)**

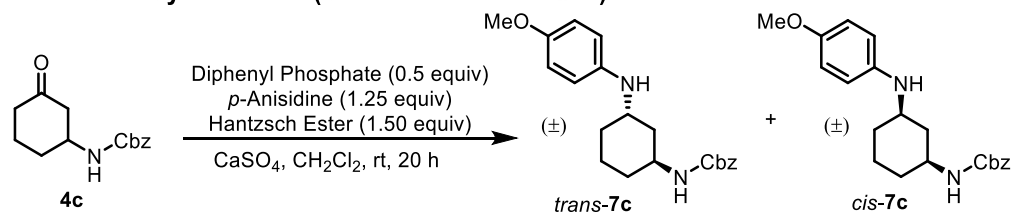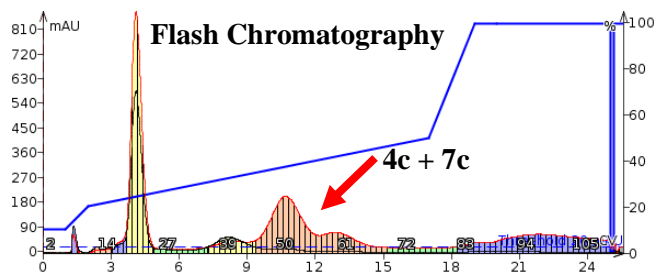



**Preparative HPLC:**

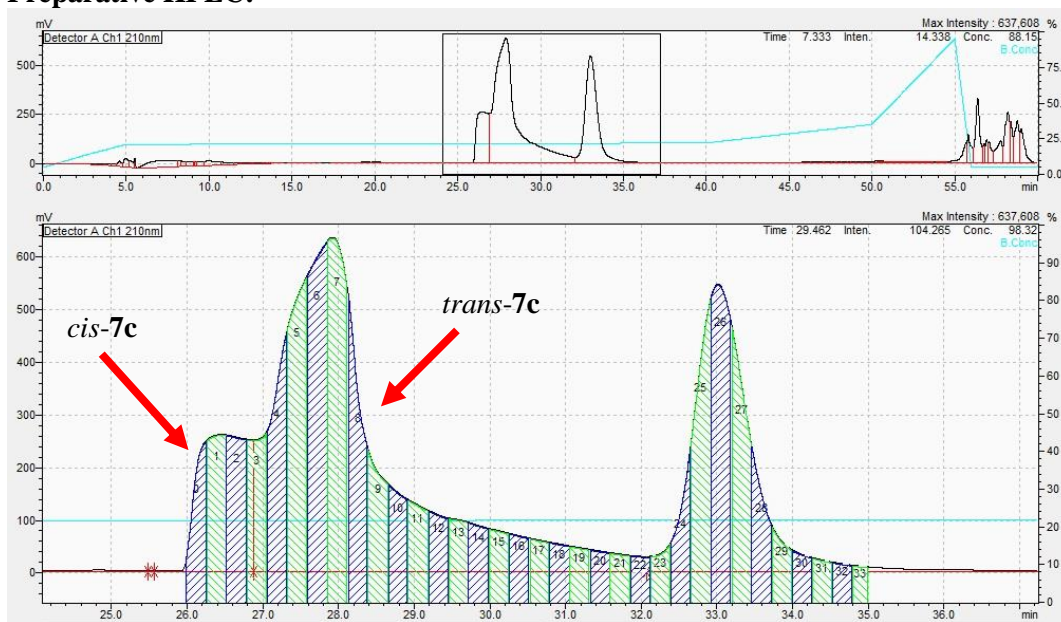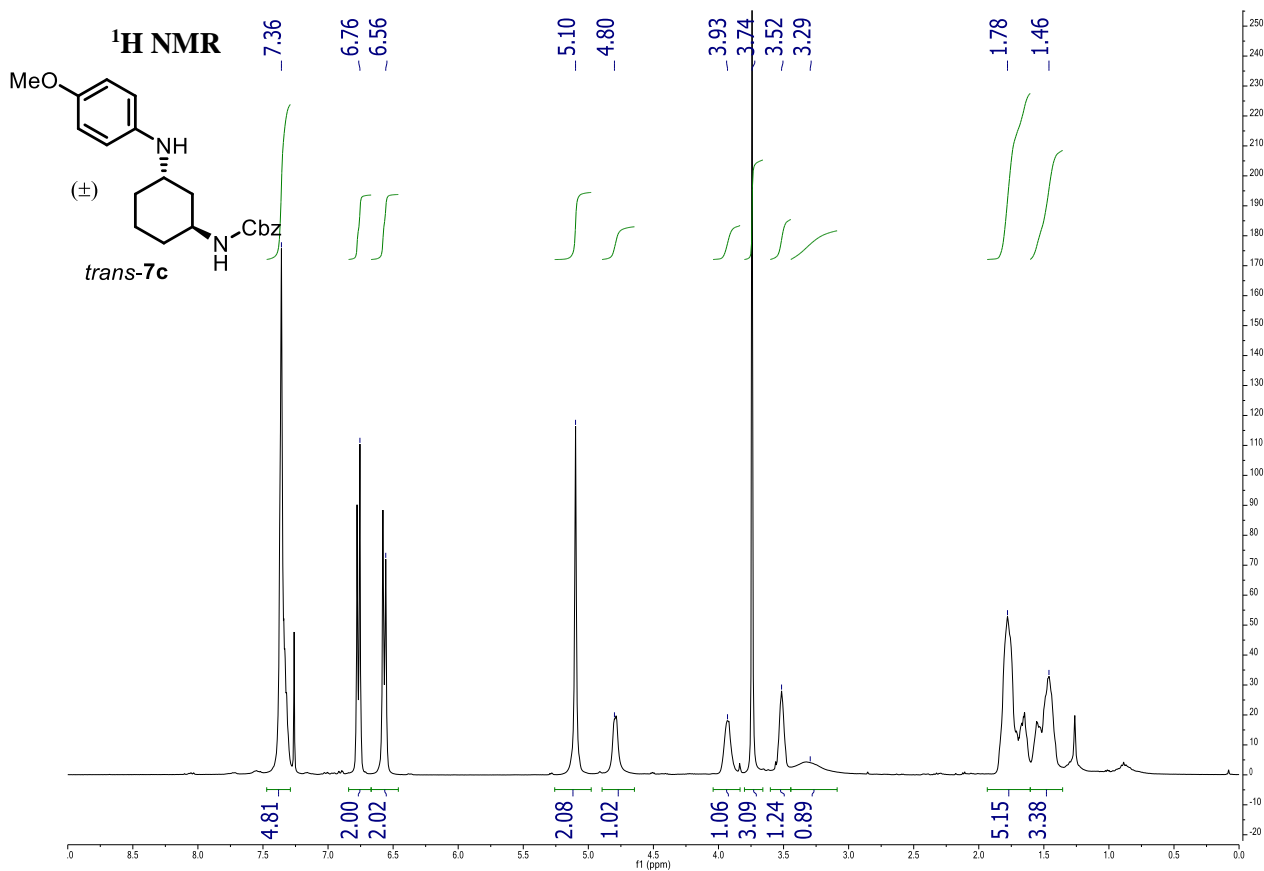

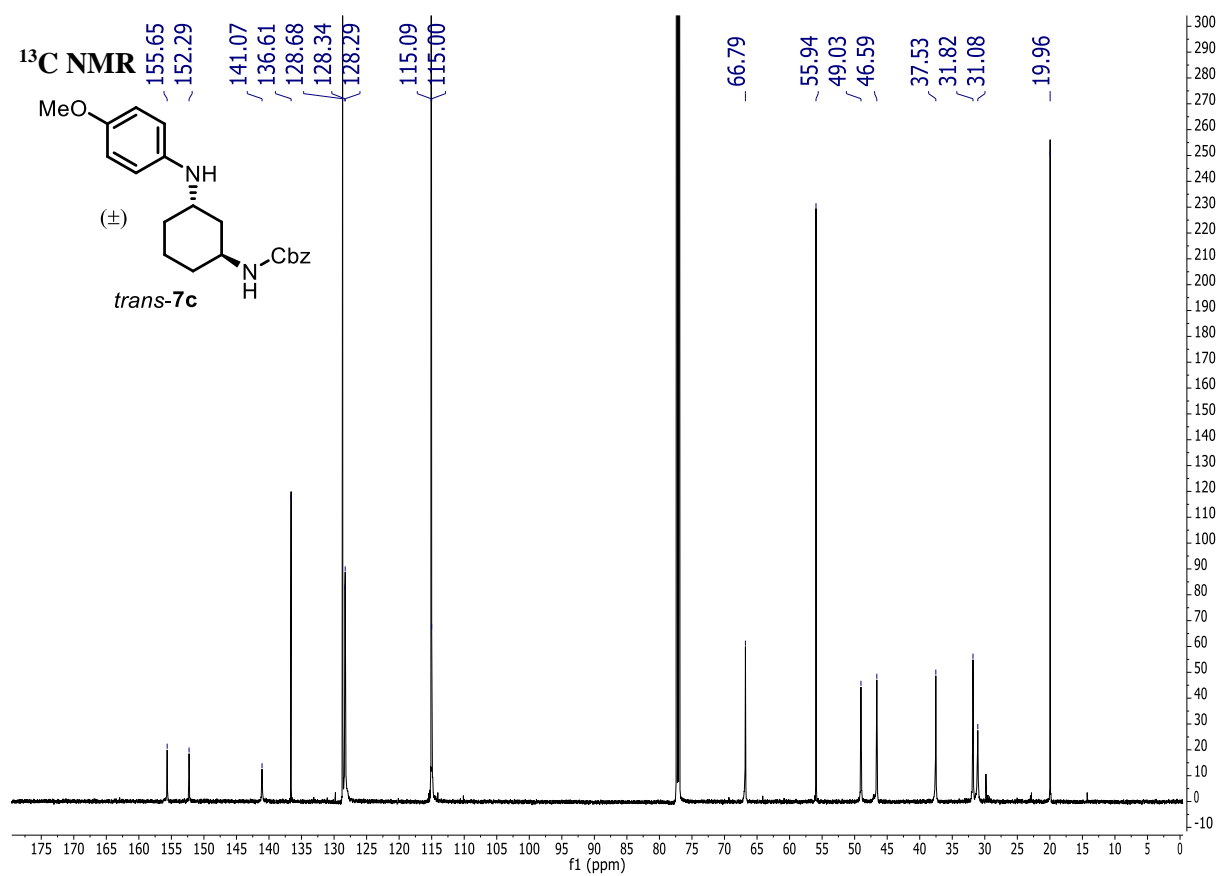

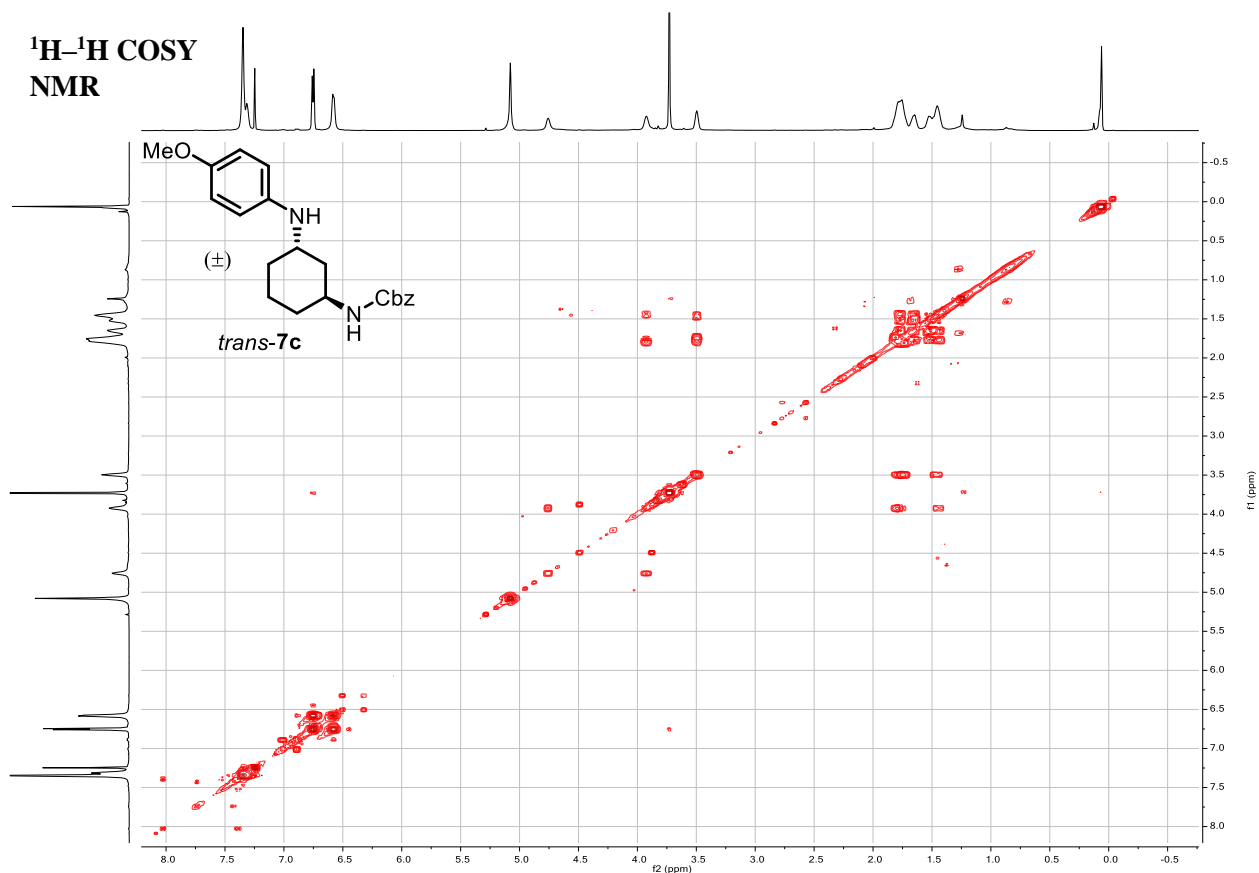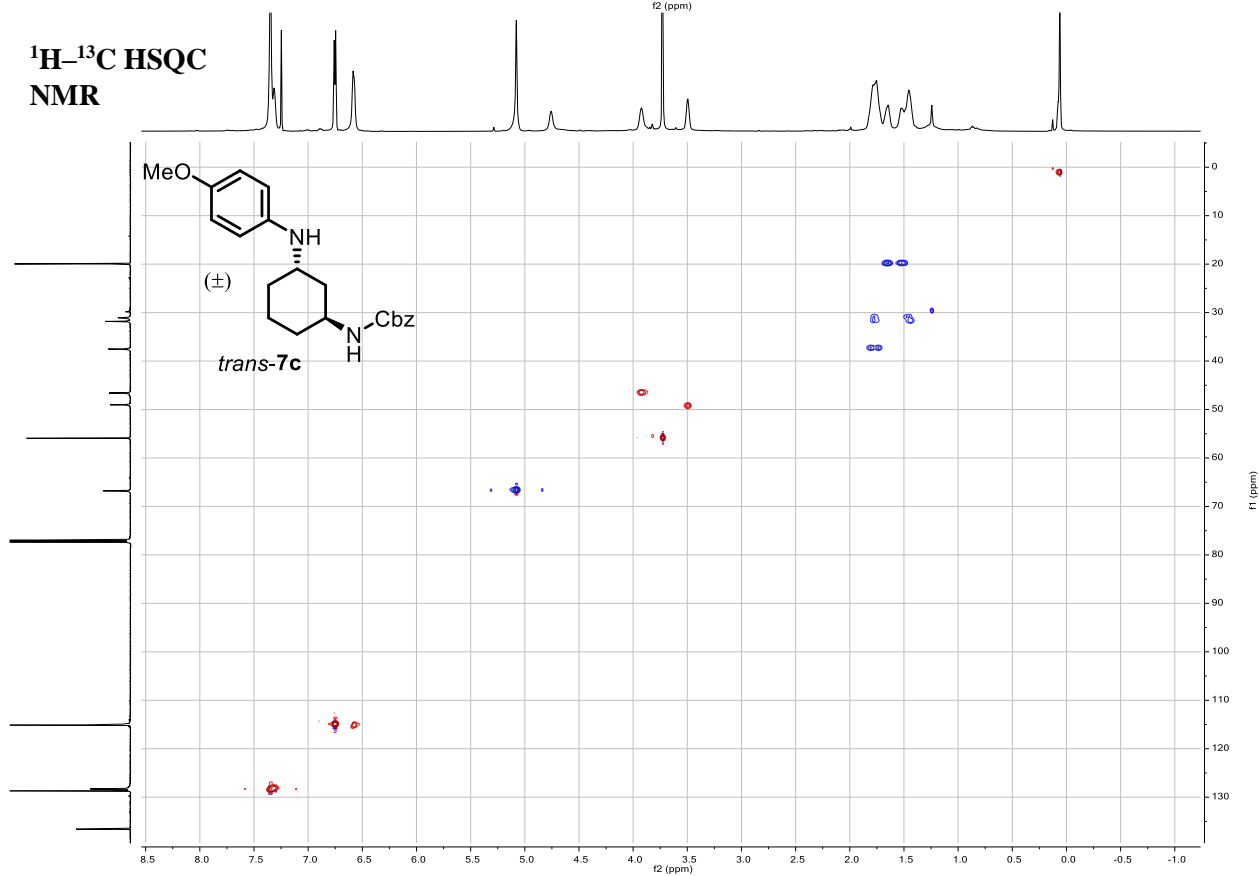

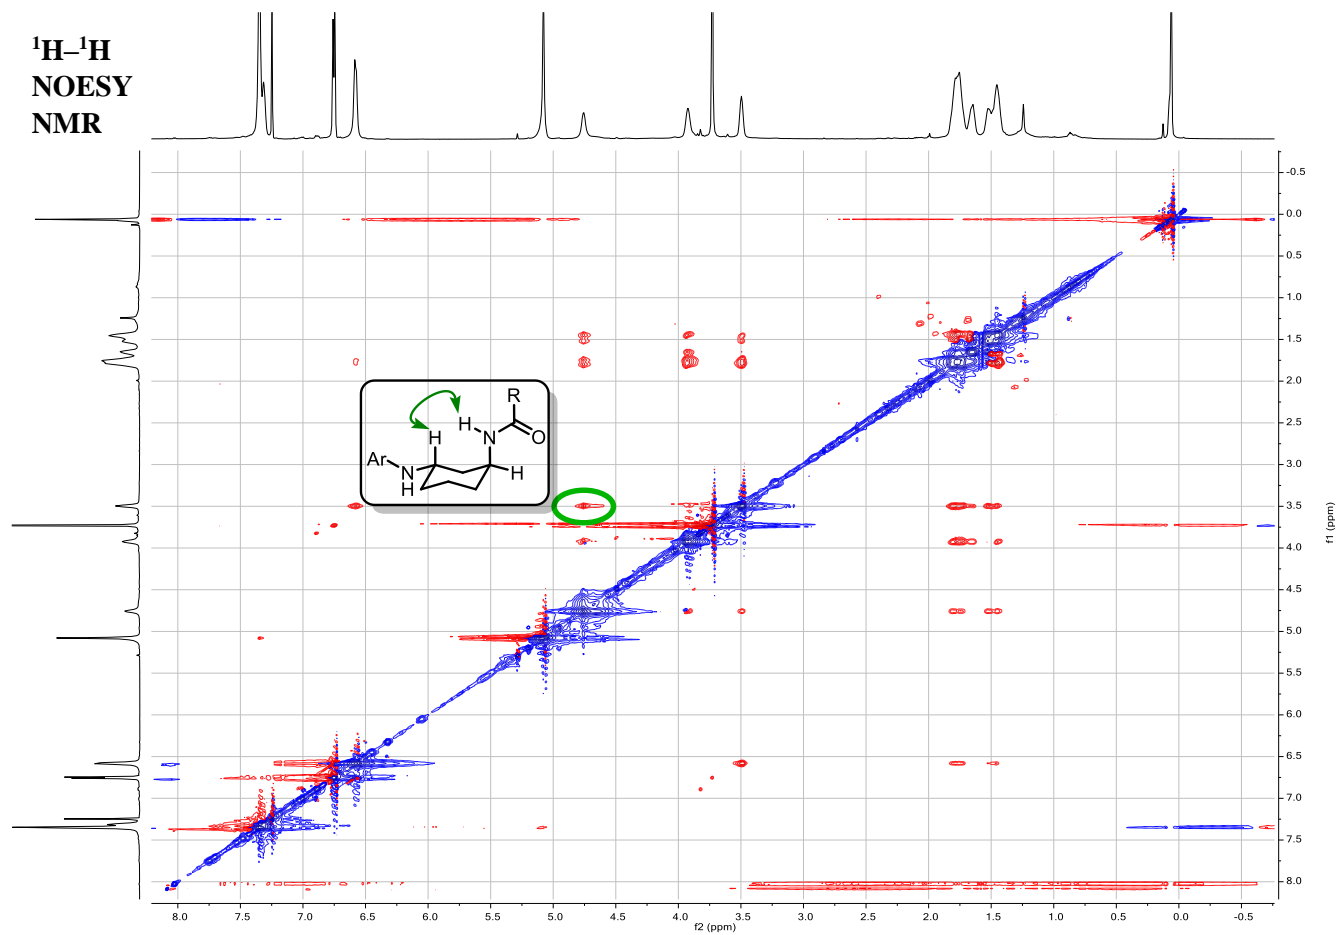

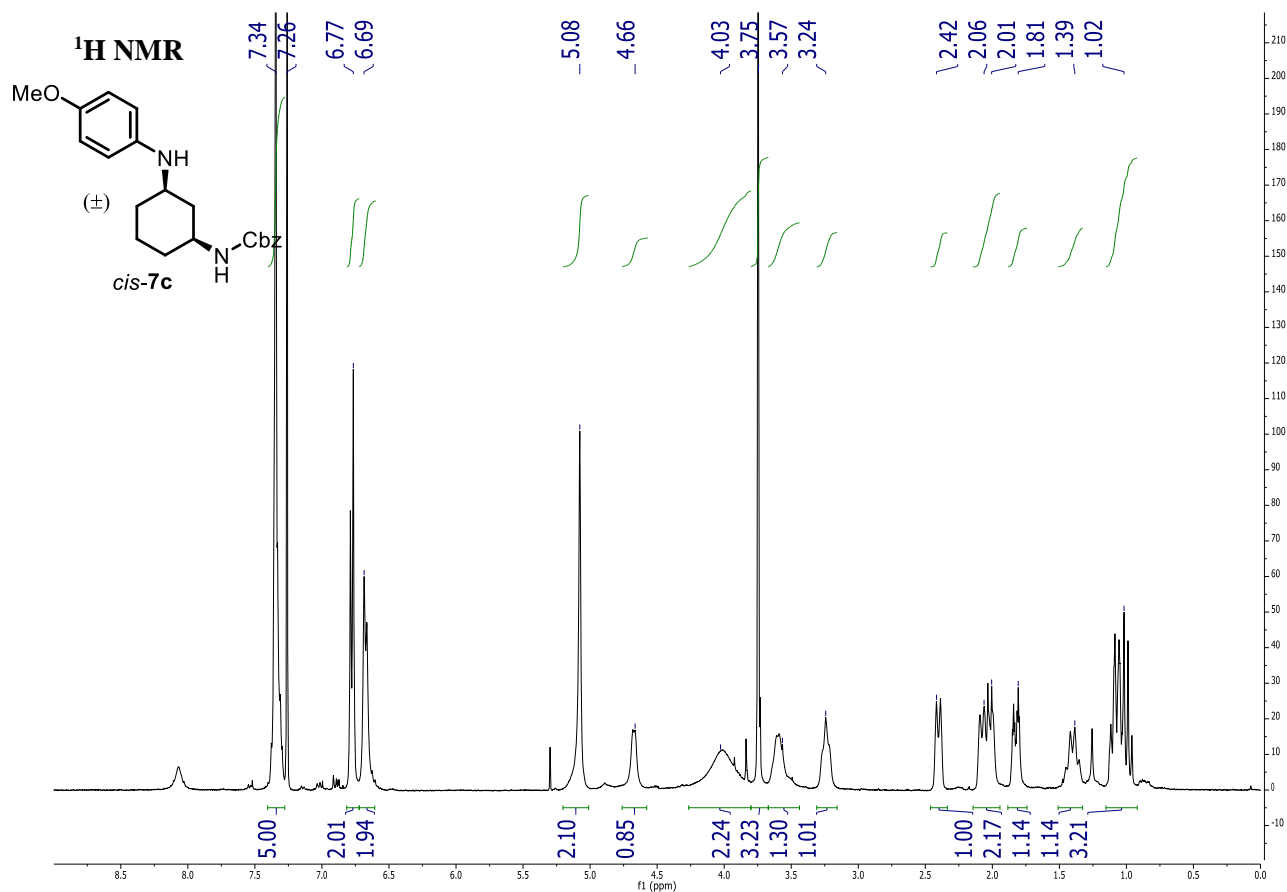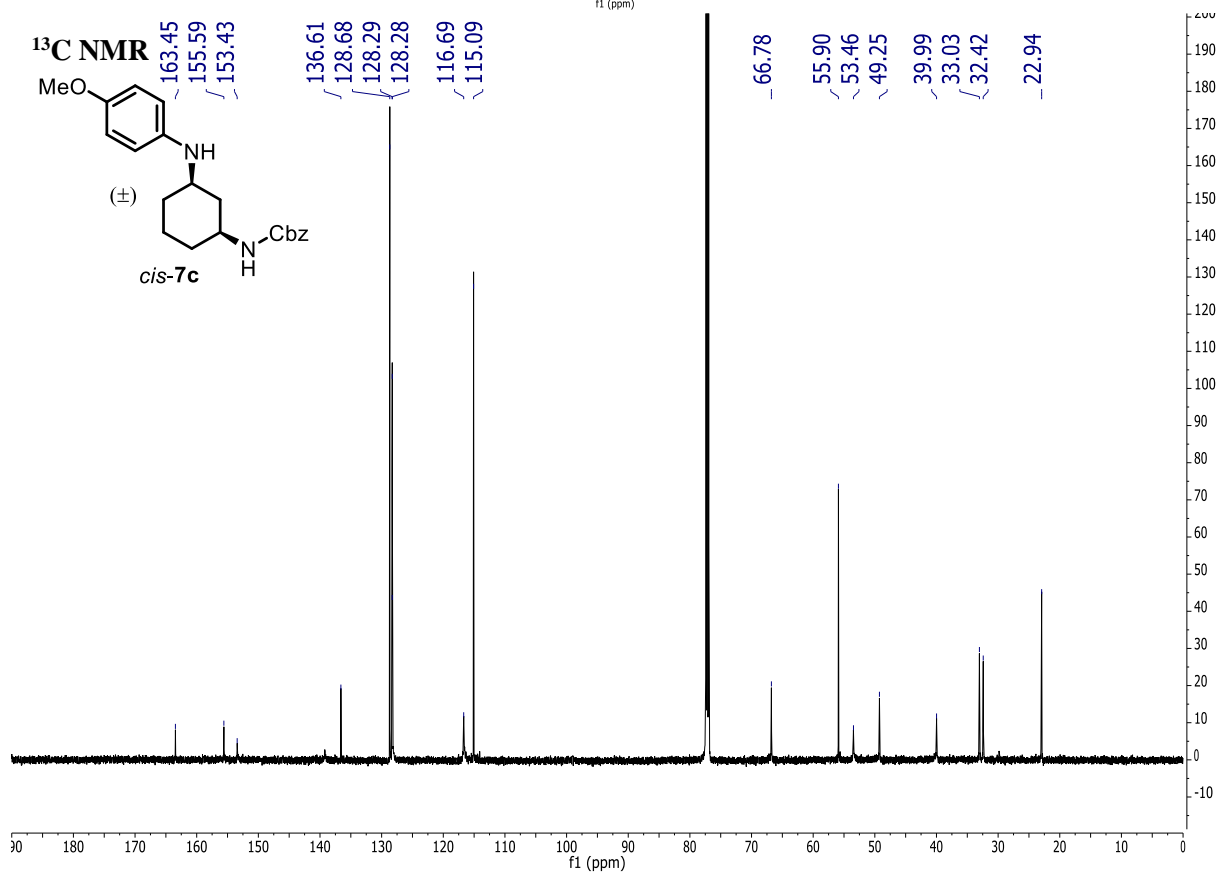

The identify of *cis*-**7c** was confirmed without a NOESY as *trans*-**7c** was analyzed with 2D methods.

**Trans- and cis-N-(3-((4-methoxyphenyl)amino)cyclohexyl)-4-methylbenzenesulfonamide (7f)**  
**Scheme S13: Synthesis 7d (General Procedure #11)**

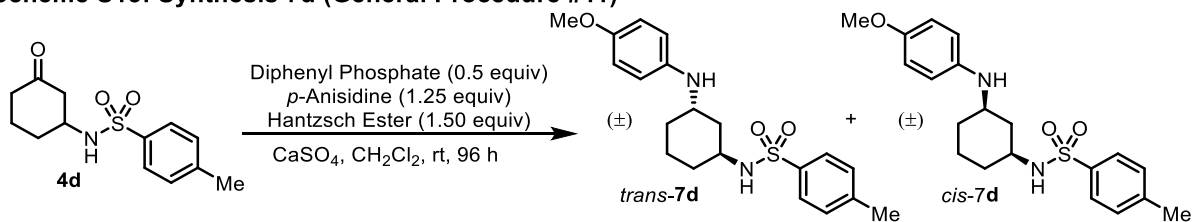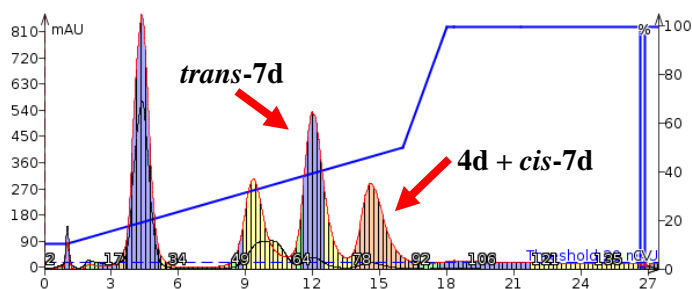

**Preparative HPLC for *trans*-7d:**

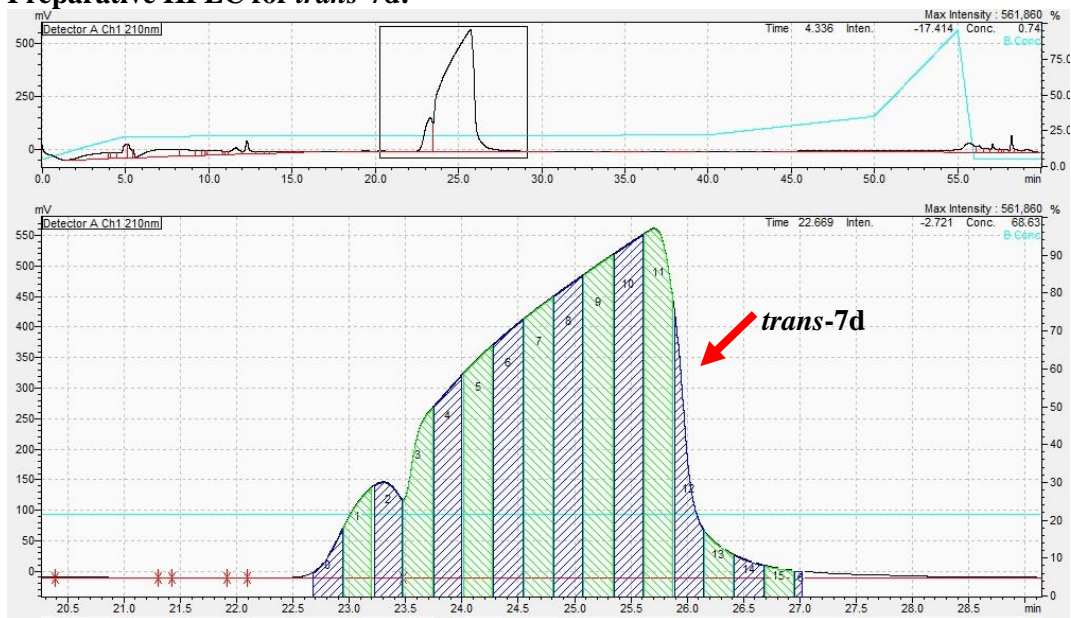

### Preparative HPLC for *cis*-7d:

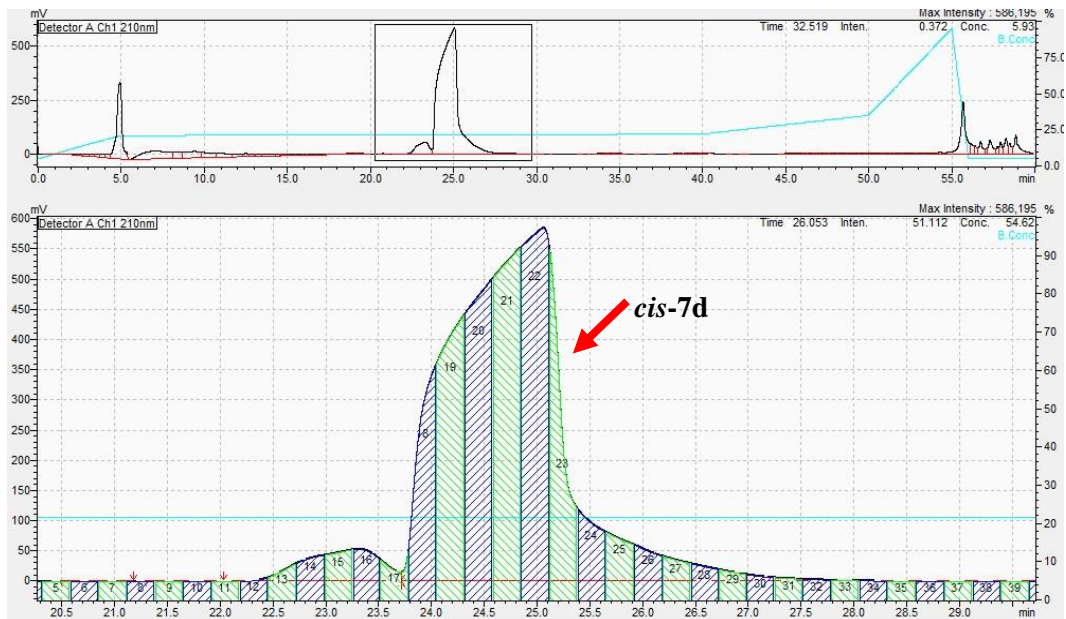

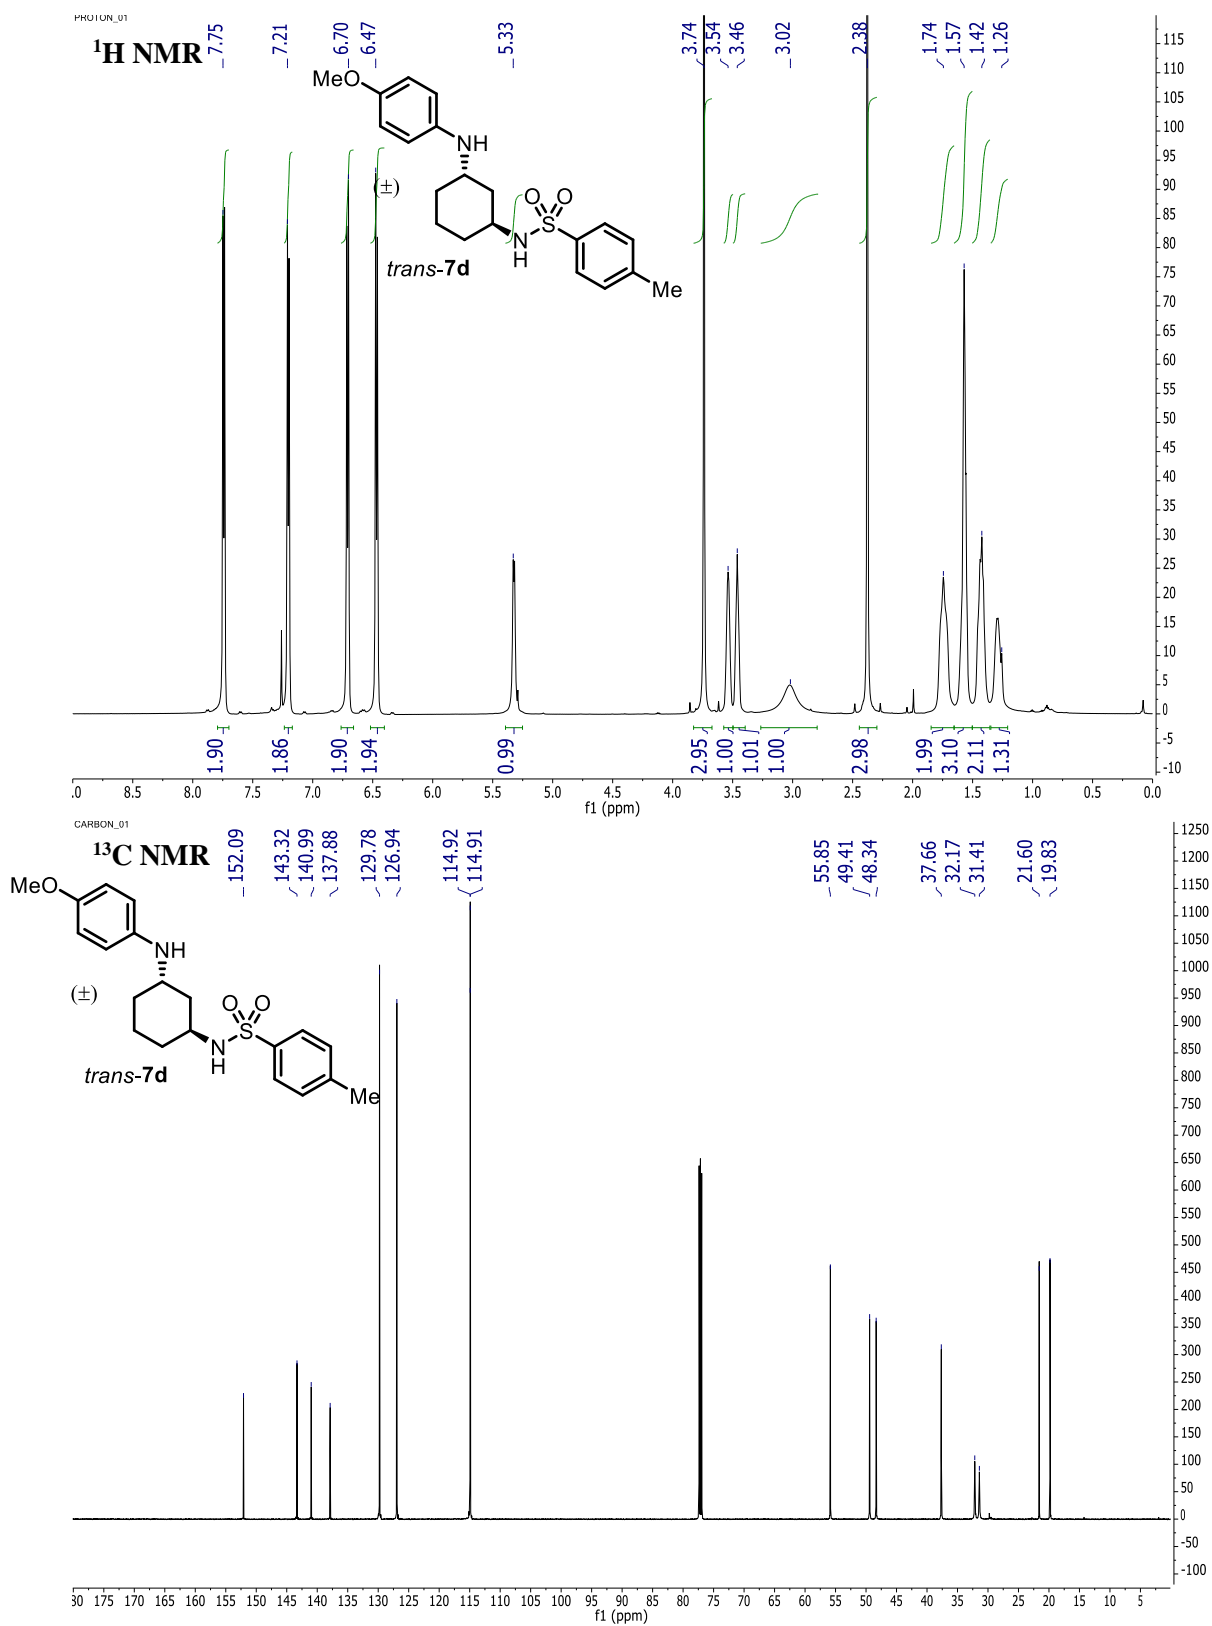



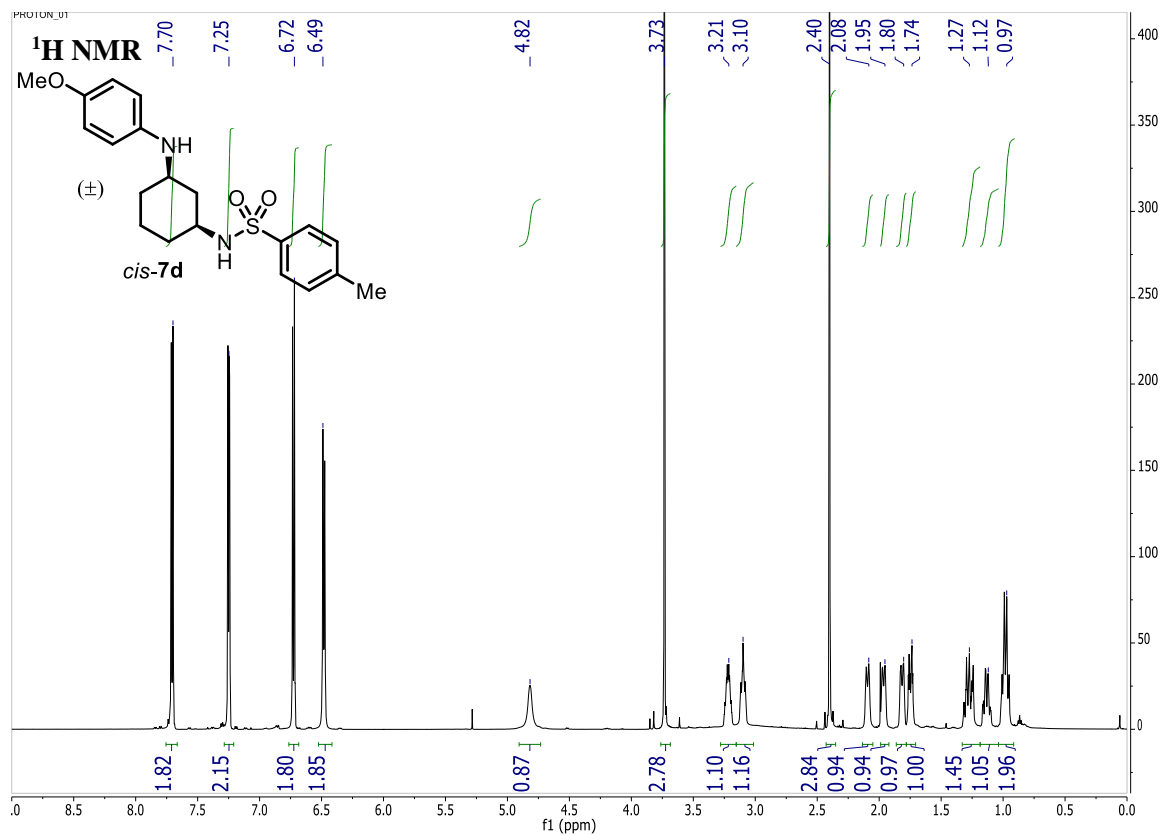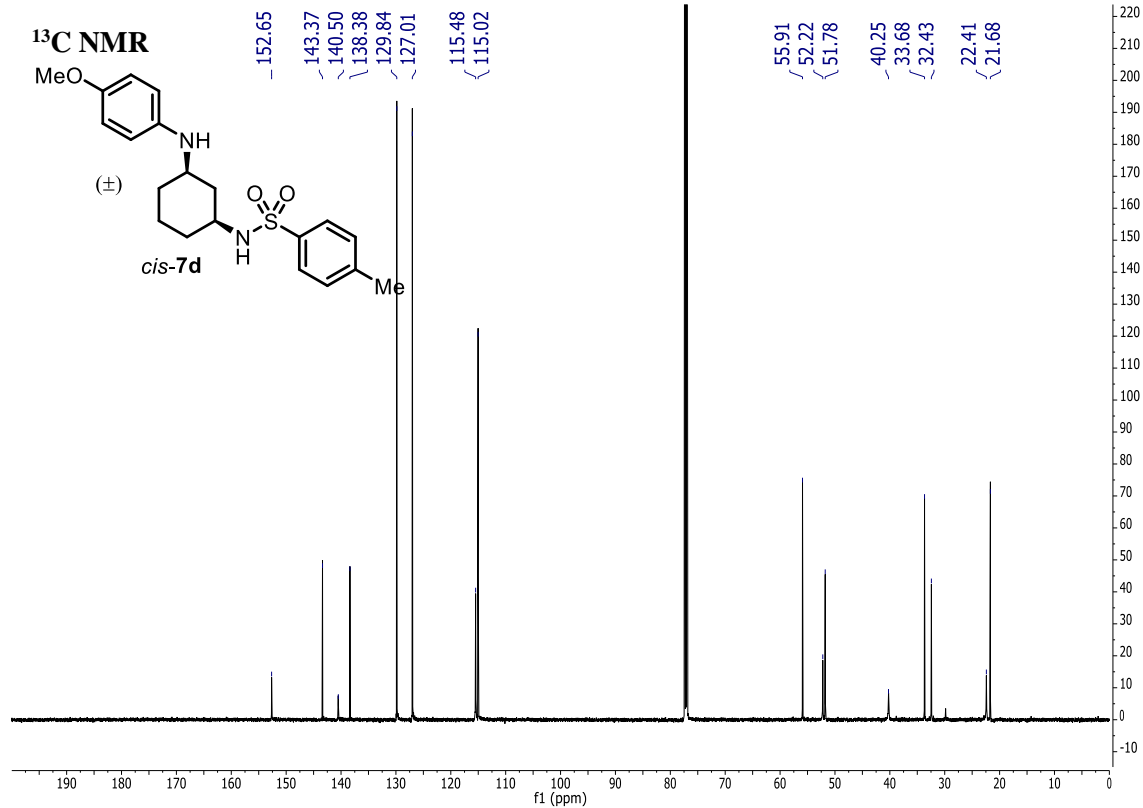

## 5. HPLC Traces

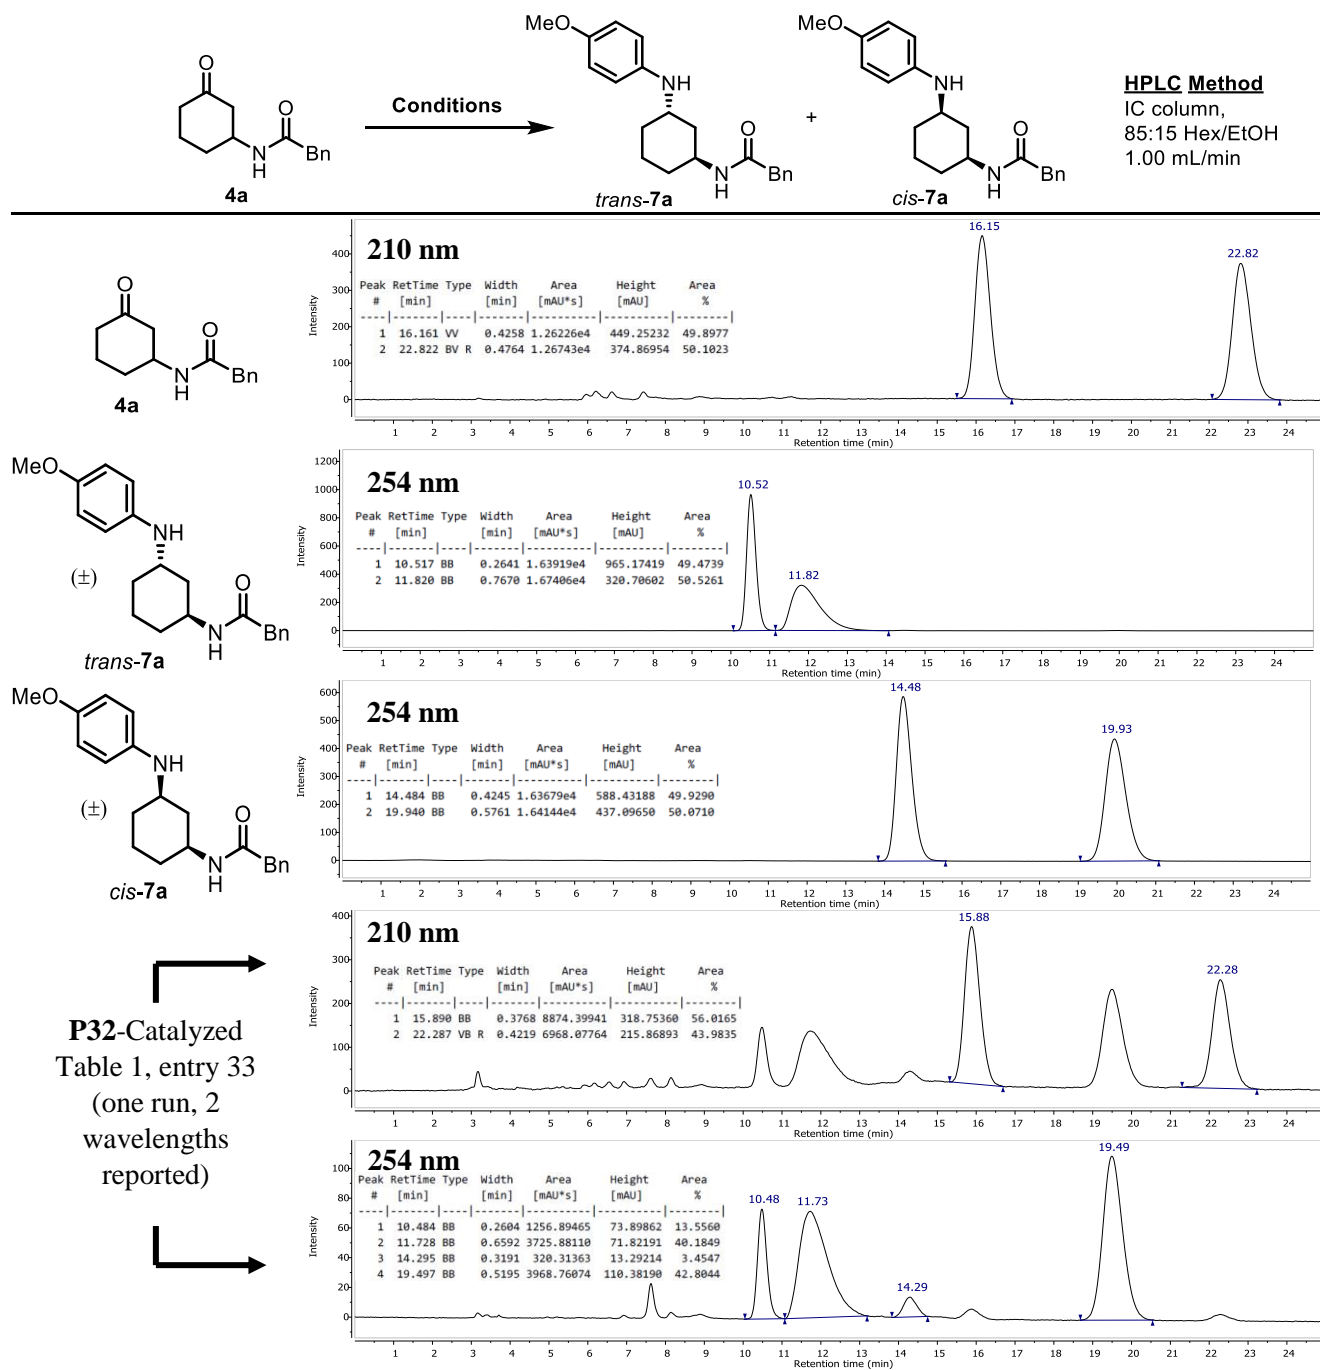

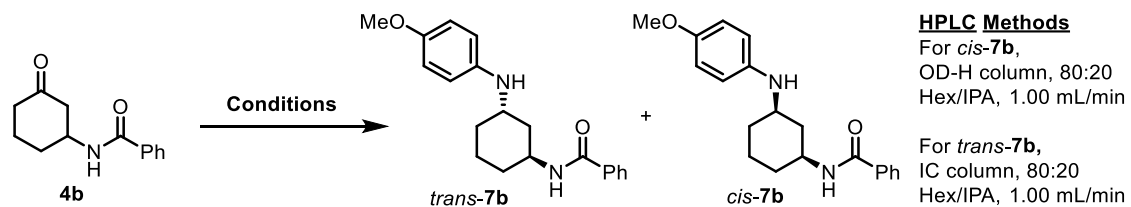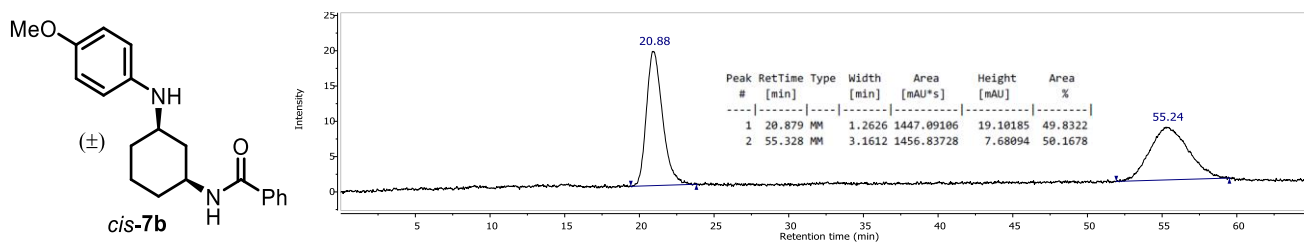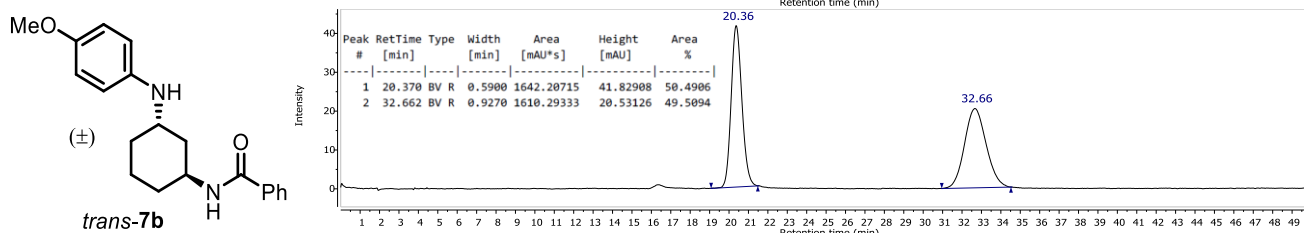

**P32-Catalyzed**  
 Table 3, entry 4  
 (OD-H Method  
 for *trans*-7b)

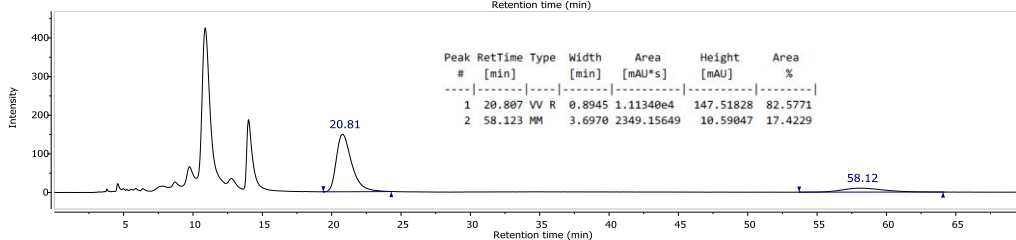

**P32-Catalyzed**  
 Table 3, entry 4  
 (IC Method for  
*cis*-7b)

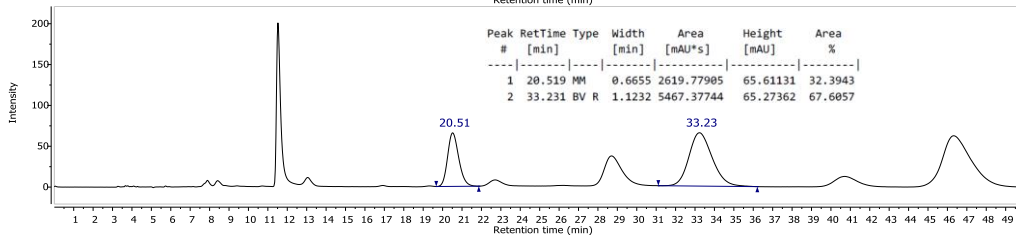

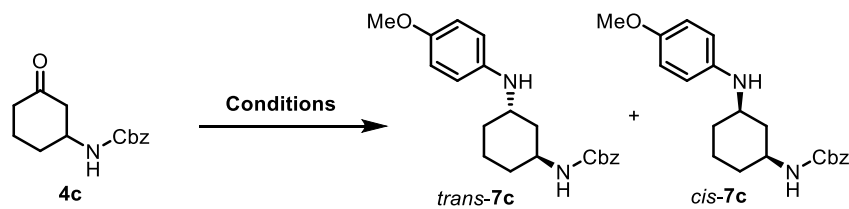

**HPLC Method**  
 IC column, 90:10  
 Hex/EtOH, 1.00 mL/min

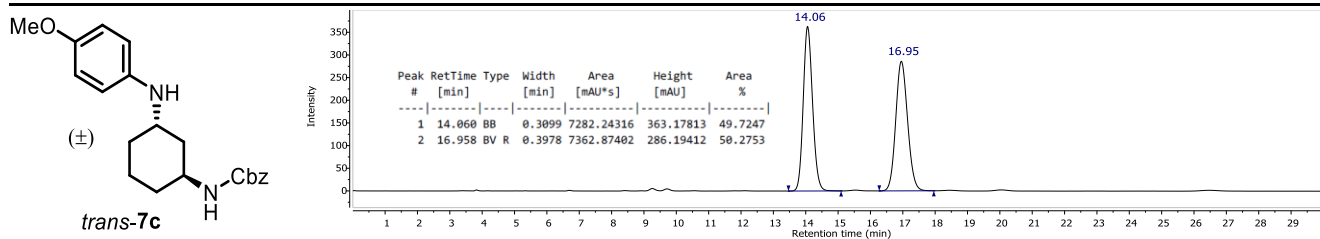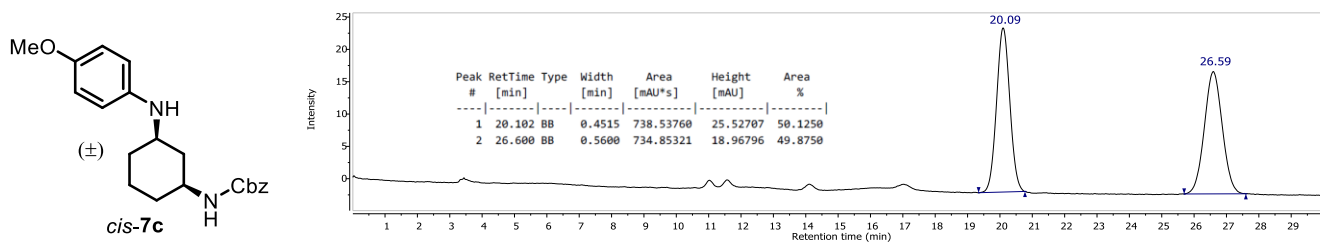

**P32-Catalyzed**  
 Table 3, entry 6

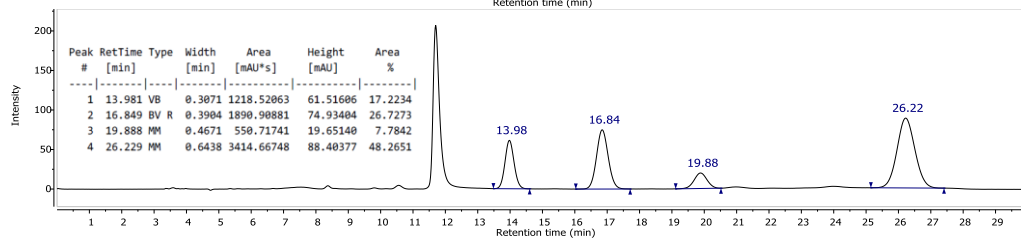

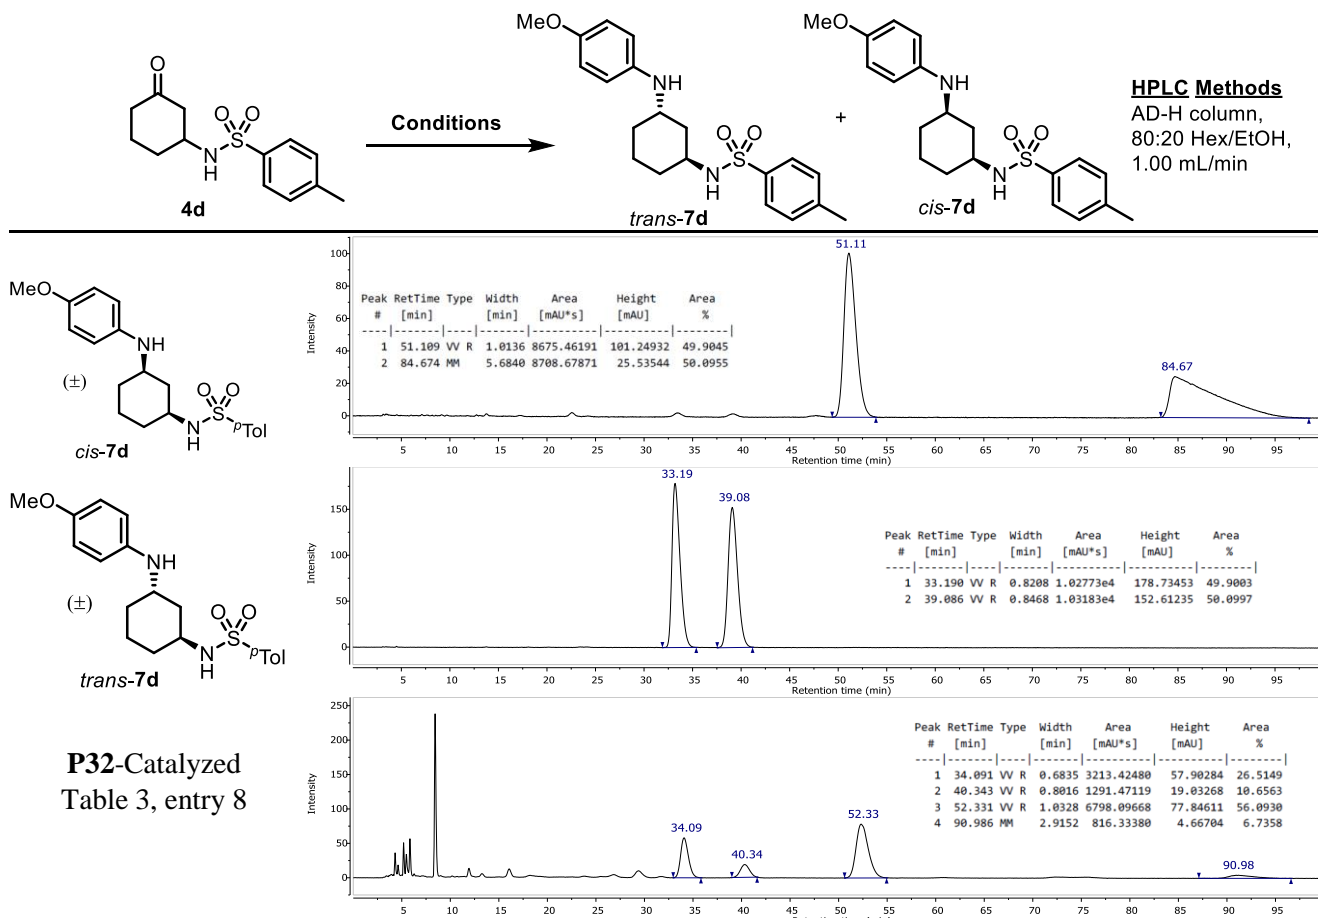

## 6. RRF Measurements by LC/MS

4a/7a:

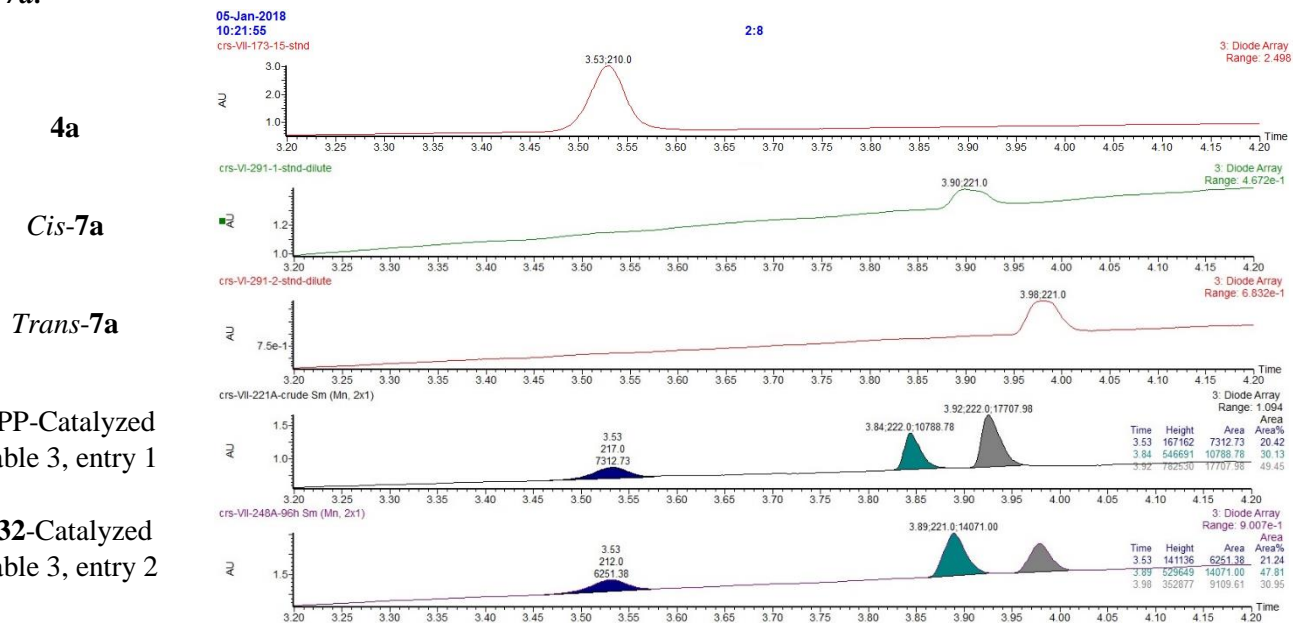

An additional LC/MS method on a Waters ACQUITY column was used for a number of screens in Table 1. An average of the RRF values for *cis*-**7a** and *trans*-**7a** was utilized (2.54), as the two peaks co-eluted. However, during the preparation of this manuscript, the column reached the end of its suggested lifetime, and secondary amines were not tolerated anymore.

**4b/7b:**

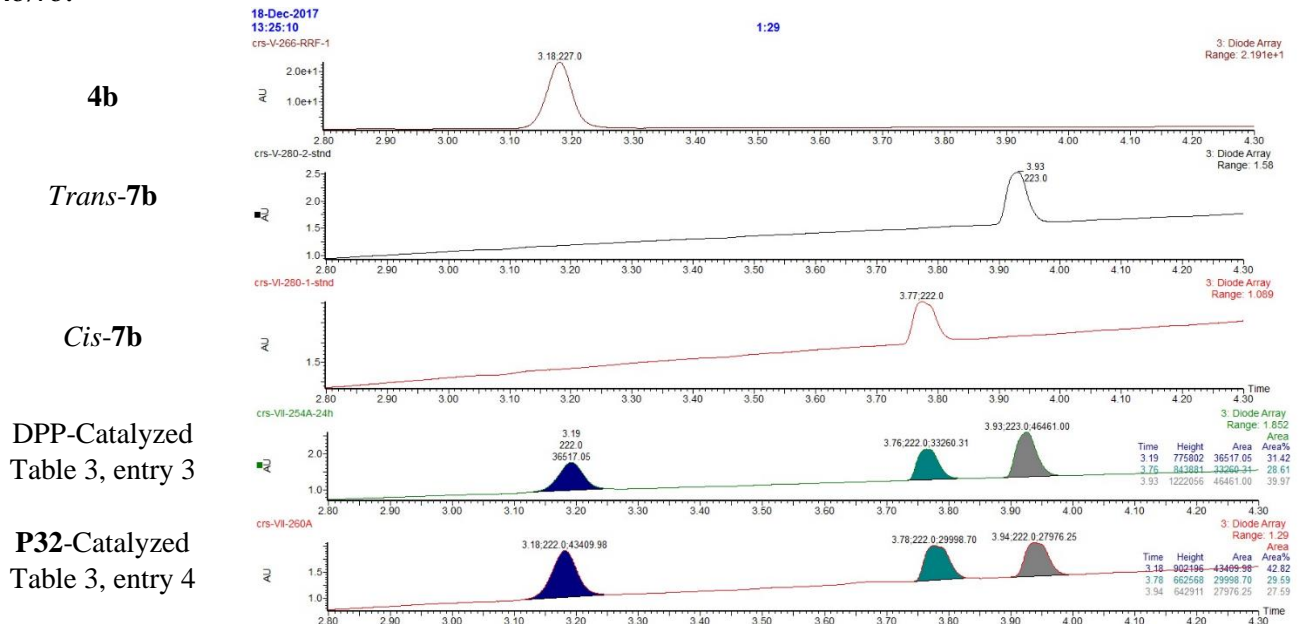

**4c/7c:**

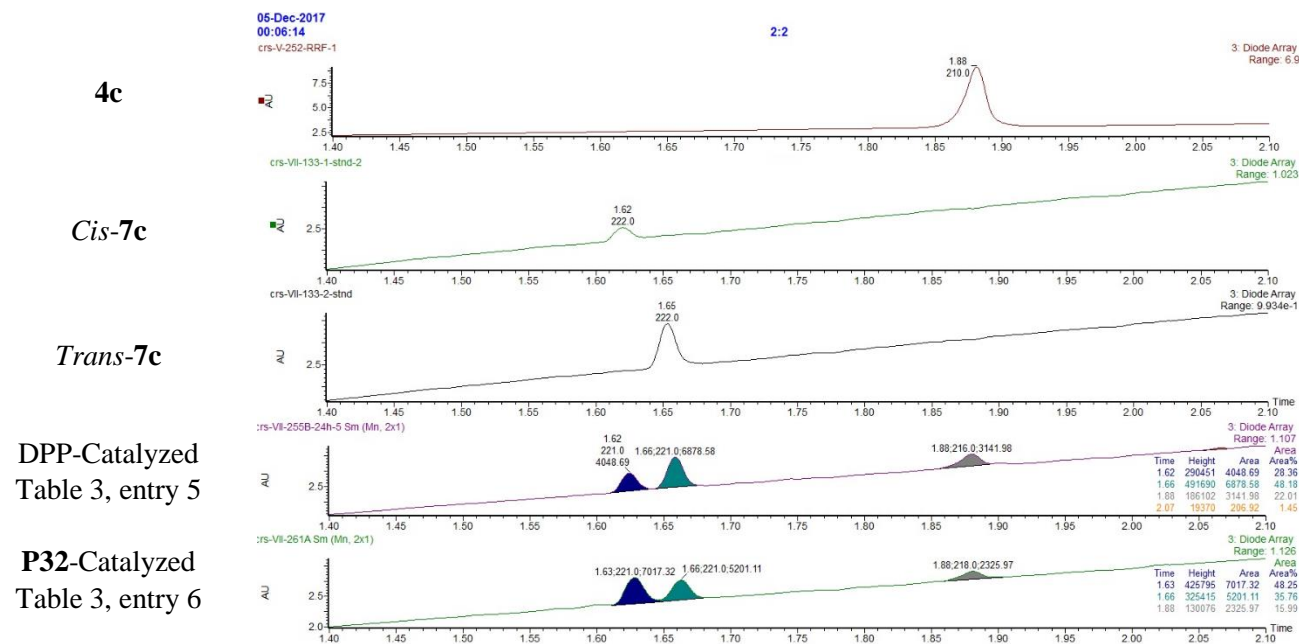

4d/7d:

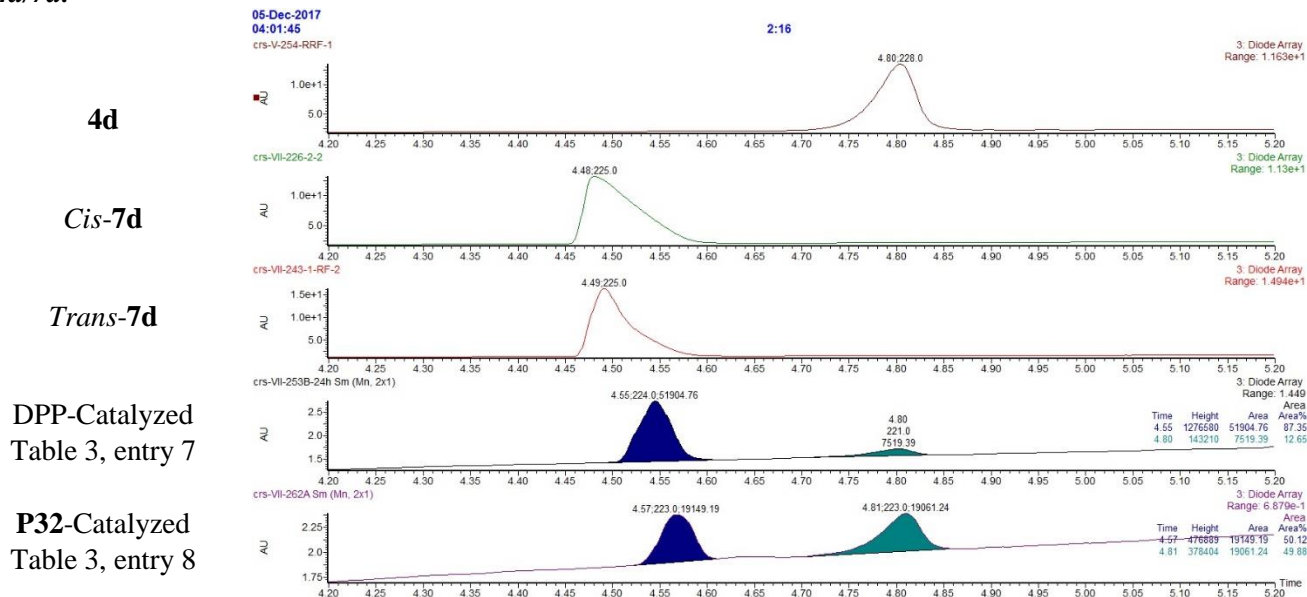DPP-Catalyzed  
Table 3, entry 7P32-Catalyzed  
Table 3, entry 8

## 7. Crystallographic Data

### 7.1. ( $\pm$ )-*trans*-7d

Low-temperature diffraction data ( $\omega$ -scans) were collected on a Rigaku MicroMax-007HF diffractometer coupled to a Dectris Pilatus3R detector with Mo K $\alpha$  ( $\lambda = 0.71073$  Å) for the structure of ( $\pm$ )-*trans*-7d. The diffraction images were processed and scaled using Rigaku Oxford Diffraction software.<sup>1</sup> The structure was solved with SHELXT and was refined against  $F^2$  on all data by full-matrix least squares with SHELXL.<sup>2</sup> All non-hydrogen atoms were refined anisotropically. Hydrogen atoms were included in the model at geometrically calculated positions and refined using a riding model. The isotropic displacement parameters of all hydrogen atoms were fixed to 1.2 times the U value of the atoms to which they are linked (1.5 times for methyl groups). The only exceptions are H1, H2, H3a, and H4 which were found in the difference map and semi-freely refined with the aid of N-H distance restraints set to a value of 0.88(2). The hydrogen atoms associated with C13 appeared to be disordered and were geometrically generated to reflect an equal occupancy, positional disorder. The CH<sub>3</sub> groups is rotated 60 degrees about the C-C bond. The atoms were then refined as riding atoms on C13. Several reflections were affected by detector artifacts and subsequently omitted from the least square refinement. The full numbering scheme of compound ( $\pm$ )-*trans*-7d can be found in the full details of the X-ray structure determination (CIF), which is included as Supporting Information. CCDC number 1818211 (( $\pm$ )-*trans*-7d) contains the supplementary crystallographic data for this paper. These data can be obtained free of charge from The Cambridge Crystallographic Data Center via [www.ccdc.cam.ac.uk/data\\_request/cif](http://www.ccdc.cam.ac.uk/data_request/cif).

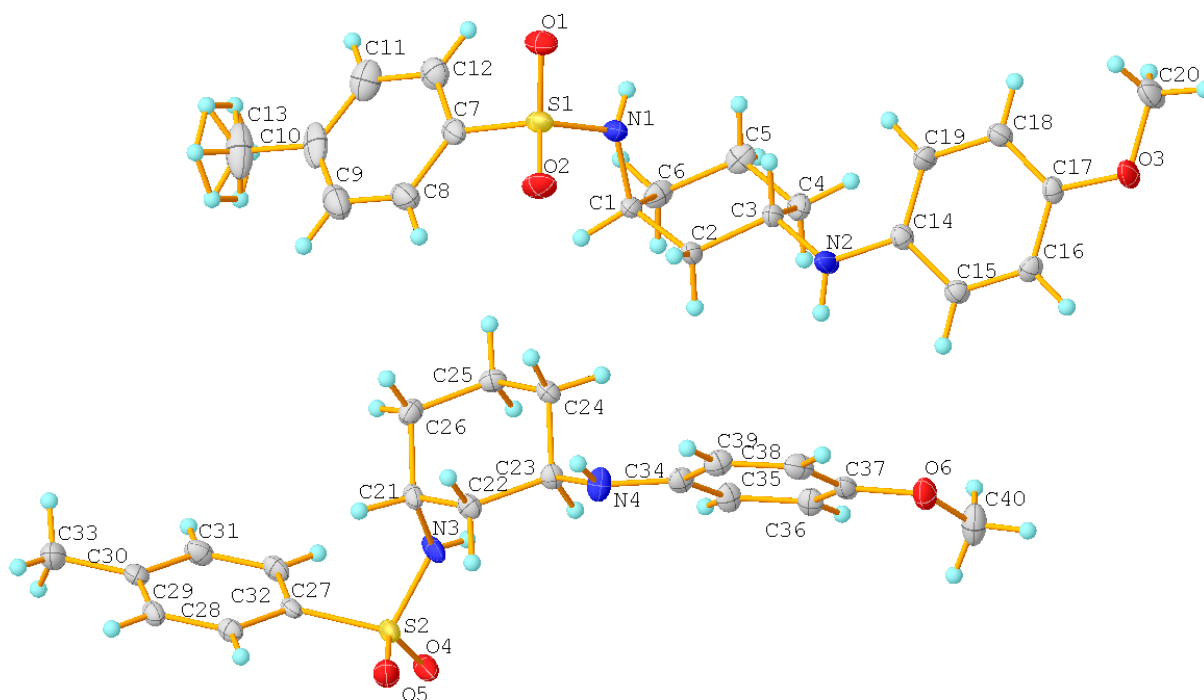

**Figure S1.** The complete numbering scheme of ( $\pm$ )-*trans*-**7d** with 50% thermal ellipsoid probability levels. The hydrogen atoms are shown as circles for clarity.



**Table S1. Crystal data and structure refinement for ( $\pm$ )-*trans*-7d.**

|                                   |                                                                 |                         |
|-----------------------------------|-----------------------------------------------------------------|-------------------------|
| Identification code               | <i>(\pm)</i> - <i>trans</i> -7d                                 |                         |
| Empirical formula                 | C <sub>20</sub> H <sub>26</sub> N <sub>2</sub> O <sub>3</sub> S |                         |
| Formula weight                    | 374.49                                                          |                         |
| Temperature                       | 93(2) K                                                         |                         |
| Wavelength                        | 0.71073 Å                                                       |                         |
| Crystal system                    | Triclinic                                                       |                         |
| Space group                       | P-1                                                             |                         |
| Unit cell dimensions              | a = 10.0230(3) Å                                                | $\alpha$ = 92.890(2)°.  |
|                                   | b = 10.6673(3) Å                                                | $\beta$ = 93.940(2)°.   |
|                                   | c = 19.6393(6) Å                                                | $\gamma$ = 110.439(3)°. |
| Volume                            | 1956.73(11) Å <sup>3</sup>                                      |                         |
| Z                                 | 4                                                               |                         |
| Density (calculated)              | 1.271 Mg/m <sup>3</sup>                                         |                         |
| Absorption coefficient            | 0.187 mm <sup>-1</sup>                                          |                         |
| F(000)                            | 800                                                             |                         |
| Crystal size                      | 0.200 x 0.120 x 0.040 mm <sup>3</sup>                           |                         |
| Crystal color and habit           | Colorless Plate                                                 |                         |
| Diffractometer                    | Dectris Pilatus 3R                                              |                         |
| Theta range for data collection   | 2.873 to 27.482°.                                               |                         |
| Index ranges                      | -13 ≤ h ≤ 13, -13 ≤ k ≤ 13, -25 ≤ l ≤ 25                        |                         |
| Reflections collected             | 49939                                                           |                         |
| Independent reflections           | 8954 [R(int) = 0.1164]                                          |                         |
| Observed reflections (I > 2σ(I))  | 6970                                                            |                         |
| Completeness to theta = 25.242°   | 99.8 %                                                          |                         |
| Absorption correction             | Semi-empirical from equivalents                                 |                         |
| Max. and min. transmission        | 1.00000 and 0.46225                                             |                         |
| Solution method                   | SHELXT-2014/5 (Sheldrick, 2014)                                 |                         |
| Refinement method                 | SHELXL-2014/7 (Sheldrick, 2014)                                 |                         |
| Data / restraints / parameters    | 8954 / 4 / 489                                                  |                         |
| Goodness-of-fit on F <sup>2</sup> | 1.031                                                           |                         |
| Final R indices [I > 2σ(I)]       | R1 = 0.0510, wR2 = 0.1177                                       |                         |
| R indices (all data)              | R1 = 0.0710, wR2 = 0.1255                                       |                         |
| Largest diff. peak and hole       | 0.417 and -0.446 e.Å <sup>-3</sup>                              |                         |

**Table S2. Atomic coordinates ( $\times 10^4$ ) and equivalent isotropic displacement parameters ( $\text{\AA}^2 \times 10^3$ ) for ( $\pm$ )-*trans*-7d. U(eq) is defined as one third of the trace of the orthogonalized  $U^{ij}$  tensor.**

|       | x        | y        | z        | U(eq) |
|-------|----------|----------|----------|-------|
| S(1)  | 6202(1)  | 3655(1)  | 9621(1)  | 20(1) |
| O(1)  | 6055(2)  | 4114(1)  | 10304(1) | 26(1) |
| O(2)  | 7554(2)  | 3585(2)  | 9461(1)  | 30(1) |
| O(3)  | 11164(2) | 13307(1) | 8480(1)  | 25(1) |
| N(1)  | 5810(2)  | 4649(2)  | 9122(1)  | 21(1) |
| N(2)  | 8784(2)  | 7721(2)  | 8046(1)  | 24(1) |
| C(1)  | 5887(2)  | 4456(2)  | 8374(1)  | 18(1) |
| C(2)  | 7314(2)  | 5416(2)  | 8174(1)  | 19(1) |
| C(3)  | 7397(2)  | 6873(2)  | 8243(1)  | 18(1) |
| C(4)  | 6139(2)  | 7030(2)  | 7818(1)  | 23(1) |
| C(5)  | 4705(2)  | 6112(2)  | 8029(1)  | 26(1) |
| C(6)  | 4612(2)  | 4648(2)  | 7982(1)  | 25(1) |
| C(7)  | 4920(2)  | 2025(2)  | 9444(1)  | 23(1) |
| C(8)  | 5323(3)  | 1002(2)  | 9156(1)  | 32(1) |
| C(9)  | 4328(3)  | -282(2)  | 9047(1)  | 38(1) |
| C(10) | 2942(3)  | -584(2)  | 9212(1)  | 40(1) |
| C(11) | 2544(3)  | 464(2)   | 9494(1)  | 38(1) |
| C(12) | 3526(2)  | 1759(2)  | 9610(1)  | 29(1) |
| C(13) | 1867(3)  | -1997(2) | 9100(2)  | 56(1) |
| C(14) | 9292(2)  | 9119(2)  | 8157(1)  | 19(1) |
| C(15) | 10441(2) | 9878(2)  | 7806(1)  | 20(1) |
| C(16) | 11035(2) | 11254(2) | 7929(1)  | 20(1) |
| C(17) | 10495(2) | 11929(2) | 8404(1)  | 19(1) |
| C(18) | 9356(2)  | 11202(2) | 8753(1)  | 21(1) |
| C(19) | 8755(2)  | 9801(2)  | 8628(1)  | 22(1) |
| C(20) | 10686(3) | 14014(2) | 8989(1)  | 32(1) |
| S(2)  | 5907(1)  | -1660(1) | 5357(1)  | 19(1) |
| O(4)  | 5339(2)  | -1457(1) | 4693(1)  | 27(1) |
| O(5)  | 7357(2)  | -1626(1) | 5438(1)  | 26(1) |
| O(6)  | 11344(2) | 8414(1)  | 6338(1)  | 27(1) |
| N(3)  | 5696(2)  | -561(2)  | 5883(1)  | 22(1) |
| N(4)  | 9010(2)  | 3053(2)  | 6920(1)  | 24(1) |

|       |          |          |         |       |
|-------|----------|----------|---------|-------|
| C(21) | 6197(2)  | -447(2)  | 6613(1) | 19(1) |
| C(22) | 7665(2)  | 668(2)   | 6777(1) | 20(1) |
| C(23) | 7584(2)  | 2066(2)  | 6715(1) | 18(1) |
| C(24) | 6455(2)  | 2254(2)  | 7154(1) | 19(1) |
| C(25) | 4982(2)  | 1152(2)  | 6996(1) | 20(1) |
| C(26) | 5088(2)  | -238(2)  | 7054(1) | 22(1) |
| C(27) | 4814(2)  | -3242(2) | 5594(1) | 16(1) |
| C(28) | 5428(2)  | -4151(2) | 5819(1) | 18(1) |
| C(29) | 4552(2)  | -5403(2) | 5987(1) | 21(1) |
| C(30) | 3071(2)  | -5764(2) | 5937(1) | 21(1) |
| C(31) | 2477(2)  | -4831(2) | 5710(1) | 24(1) |
| C(32) | 3336(2)  | -3579(2) | 5542(1) | 22(1) |
| C(33) | 2119(3)  | -7123(2) | 6119(1) | 31(1) |
| C(34) | 9435(2)  | 4402(2)  | 6783(1) | 20(1) |
| C(35) | 8826(2)  | 4877(2)  | 6245(1) | 22(1) |
| C(36) | 9416(2)  | 6215(2)  | 6081(1) | 22(1) |
| C(37) | 10629(2) | 7098(2)  | 6467(1) | 21(1) |
| C(38) | 11204(2) | 6647(2)  | 7028(1) | 24(1) |
| C(39) | 10624(2) | 5330(2)  | 7186(1) | 23(1) |
| C(40) | 10892(3) | 8868(2)  | 5721(1) | 38(1) |

---

| <b>Table S3. Bond lengths [Å] and angles [°]<br/>for (±)-<i>trans</i>-7d.</b> |            |              |            |
|-------------------------------------------------------------------------------|------------|--------------|------------|
|                                                                               |            | C(10)-C(11)  | 1.412(4)   |
|                                                                               |            | C(10)-C(13)  | 1.511(3)   |
|                                                                               |            | C(11)-C(12)  | 1.385(3)   |
| S(1)-O(2)                                                                     | 1.4369(15) | C(11)-H(11)  | 0.9500     |
| S(1)-O(1)                                                                     | 1.4412(14) | C(12)-H(12)  | 0.9500     |
| S(1)-N(1)                                                                     | 1.6068(17) | C(13)-H(13A) | 0.9800     |
| S(1)-C(7)                                                                     | 1.765(2)   | C(13)-H(13B) | 0.9800     |
| O(3)-C(17)                                                                    | 1.381(2)   | C(13)-H(13C) | 0.9800     |
| O(3)-C(20)                                                                    | 1.428(2)   | C(13)-H(13D) | 0.9800     |
| N(1)-C(1)                                                                     | 1.483(2)   | C(13)-H(13E) | 0.9800     |
| N(1)-H(1)                                                                     | 0.855(16)  | C(13)-H(13F) | 0.9800     |
| N(2)-C(14)                                                                    | 1.397(2)   | C(14)-C(19)  | 1.397(3)   |
| N(2)-C(3)                                                                     | 1.460(3)   | C(14)-C(15)  | 1.403(3)   |
| N(2)-H(2)                                                                     | 0.874(16)  | C(15)-C(16)  | 1.378(3)   |
| C(1)-C(6)                                                                     | 1.527(3)   | C(15)-H(15)  | 0.9500     |
| C(1)-C(2)                                                                     | 1.531(3)   | C(16)-C(17)  | 1.399(3)   |
| C(1)-H(1A)                                                                    | 1.0000     | C(16)-H(16)  | 0.9500     |
| C(2)-C(3)                                                                     | 1.526(2)   | C(17)-C(18)  | 1.384(3)   |
| C(2)-H(2A)                                                                    | 0.9900     | C(18)-C(19)  | 1.404(3)   |
| C(2)-H(2B)                                                                    | 0.9900     | C(18)-H(18)  | 0.9500     |
| C(3)-C(4)                                                                     | 1.526(3)   | C(19)-H(19)  | 0.9500     |
| C(3)-H(3)                                                                     | 1.0000     | C(20)-H(20A) | 0.9800     |
| C(4)-C(5)                                                                     | 1.529(3)   | C(20)-H(20B) | 0.9800     |
| C(4)-H(4A)                                                                    | 0.9900     | C(20)-H(20C) | 0.9800     |
| C(4)-H(4B)                                                                    | 0.9900     | S(2)-O(5)    | 1.4383(15) |
| C(5)-C(6)                                                                     | 1.529(3)   | S(2)-O(4)    | 1.4437(14) |
| C(5)-H(5A)                                                                    | 0.9900     | S(2)-N(3)    | 1.6028(16) |
| C(5)-H(5B)                                                                    | 0.9900     | S(2)-C(27)   | 1.7679(19) |
| C(6)-H(6A)                                                                    | 0.9900     | O(6)-C(37)   | 1.381(2)   |
| C(6)-H(6B)                                                                    | 0.9900     | O(6)-C(40)   | 1.430(3)   |
| C(7)-C(12)                                                                    | 1.391(3)   | N(3)-C(21)   | 1.470(2)   |
| C(7)-C(8)                                                                     | 1.396(3)   | N(3)-H(3A)   | 0.850(16)  |
| C(8)-C(9)                                                                     | 1.380(3)   | N(4)-C(34)   | 1.397(2)   |
| C(8)-H(8)                                                                     | 0.9500     | N(4)-C(23)   | 1.463(2)   |
| C(9)-C(10)                                                                    | 1.378(4)   | N(4)-H(4)    | 0.853(16)  |
| C(9)-H(9)                                                                     | 0.9500     | C(21)-C(26)  | 1.524(3)   |

|              |          |                  |            |
|--------------|----------|------------------|------------|
| C(21)-C(22)  | 1.536(3) | C(38)-C(39)      | 1.380(3)   |
| C(21)-H(21)  | 1.0000   | C(38)-H(38)      | 0.9500     |
| C(22)-C(23)  | 1.532(2) | C(39)-H(39)      | 0.9500     |
| C(22)-H(22A) | 0.9900   | C(40)-H(40A)     | 0.9800     |
| C(22)-H(22B) | 0.9900   | C(40)-H(40B)     | 0.9800     |
| C(23)-C(24)  | 1.530(3) | C(40)-H(40C)     | 0.9800     |
| C(23)-H(23)  | 1.0000   | O(2)-S(1)-O(1)   | 119.14(9)  |
| C(24)-C(25)  | 1.532(3) | O(2)-S(1)-N(1)   | 108.20(9)  |
| C(24)-H(24A) | 0.9900   | O(1)-S(1)-N(1)   | 105.98(8)  |
| C(24)-H(24B) | 0.9900   | O(2)-S(1)-C(7)   | 106.89(10) |
| C(25)-C(26)  | 1.533(3) | O(1)-S(1)-C(7)   | 107.30(9)  |
| C(25)-H(25A) | 0.9900   | N(1)-S(1)-C(7)   | 109.06(9)  |
| C(25)-H(25B) | 0.9900   | C(17)-O(3)-C(20) | 116.64(16) |
| C(26)-H(26A) | 0.9900   | C(1)-N(1)-S(1)   | 119.31(13) |
| C(26)-H(26B) | 0.9900   | C(1)-N(1)-H(1)   | 117.0(17)  |
| C(27)-C(28)  | 1.392(2) | S(1)-N(1)-H(1)   | 114.3(17)  |
| C(27)-C(32)  | 1.392(3) | C(14)-N(2)-C(3)  | 122.67(16) |
| C(28)-C(29)  | 1.388(3) | C(14)-N(2)-H(2)  | 115.9(16)  |
| C(28)-H(28)  | 0.9500   | C(3)-N(2)-H(2)   | 113.5(16)  |
| C(29)-C(30)  | 1.392(3) | N(1)-C(1)-C(6)   | 110.07(16) |
| C(29)-H(29)  | 0.9500   | N(1)-C(1)-C(2)   | 109.82(15) |
| C(30)-C(31)  | 1.403(3) | C(6)-C(1)-C(2)   | 111.93(16) |
| C(30)-C(33)  | 1.508(3) | N(1)-C(1)-H(1A)  | 108.3      |
| C(31)-C(32)  | 1.383(3) | C(6)-C(1)-H(1A)  | 108.3      |
| C(31)-H(31)  | 0.9500   | C(2)-C(1)-H(1A)  | 108.3      |
| C(32)-H(32)  | 0.9500   | C(3)-C(2)-C(1)   | 111.74(16) |
| C(33)-H(33A) | 0.9800   | C(3)-C(2)-H(2A)  | 109.3      |
| C(33)-H(33B) | 0.9800   | C(1)-C(2)-H(2A)  | 109.3      |
| C(33)-H(33C) | 0.9800   | C(3)-C(2)-H(2B)  | 109.3      |
| C(34)-C(35)  | 1.389(3) | C(1)-C(2)-H(2B)  | 109.3      |
| C(34)-C(39)  | 1.411(3) | H(2A)-C(2)-H(2B) | 107.9      |
| C(35)-C(36)  | 1.404(3) | N(2)-C(3)-C(4)   | 113.11(16) |
| C(35)-H(35)  | 0.9500   | N(2)-C(3)-C(2)   | 108.40(16) |
| C(36)-C(37)  | 1.393(3) | C(4)-C(3)-C(2)   | 110.15(15) |
| C(36)-H(36)  | 0.9500   | N(2)-C(3)-H(3)   | 108.4      |
| C(37)-C(38)  | 1.392(3) | C(4)-C(3)-H(3)   | 108.4      |

|                   |            |                     |            |
|-------------------|------------|---------------------|------------|
| C(2)-C(3)-H(3)    | 108.4      | C(7)-C(12)-H(12)    | 120.4      |
| C(3)-C(4)-C(5)    | 111.78(16) | C(10)-C(13)-H(13A)  | 109.5      |
| C(3)-C(4)-H(4A)   | 109.3      | C(10)-C(13)-H(13B)  | 109.5      |
| C(5)-C(4)-H(4A)   | 109.3      | H(13A)-C(13)-H(13B) | 109.5      |
| C(3)-C(4)-H(4B)   | 109.3      | C(10)-C(13)-H(13C)  | 109.5      |
| C(5)-C(4)-H(4B)   | 109.3      | H(13A)-C(13)-H(13C) | 109.5      |
| H(4A)-C(4)-H(4B)  | 107.9      | H(13B)-C(13)-H(13C) | 109.5      |
| C(6)-C(5)-C(4)    | 110.77(17) | C(10)-C(13)-H(13D)  | 109.5      |
| C(6)-C(5)-H(5A)   | 109.5      | H(13A)-C(13)-H(13D) | 141.1      |
| C(4)-C(5)-H(5A)   | 109.5      | H(13B)-C(13)-H(13D) | 56.3       |
| C(6)-C(5)-H(5B)   | 109.5      | H(13C)-C(13)-H(13D) | 56.3       |
| C(4)-C(5)-H(5B)   | 109.5      | C(10)-C(13)-H(13E)  | 109.5      |
| H(5A)-C(5)-H(5B)  | 108.1      | H(13A)-C(13)-H(13E) | 56.3       |
| C(1)-C(6)-C(5)    | 112.48(15) | H(13B)-C(13)-H(13E) | 141.1      |
| C(1)-C(6)-H(6A)   | 109.1      | H(13C)-C(13)-H(13E) | 56.3       |
| C(5)-C(6)-H(6A)   | 109.1      | H(13D)-C(13)-H(13E) | 109.5      |
| C(1)-C(6)-H(6B)   | 109.1      | C(10)-C(13)-H(13F)  | 109.5      |
| C(5)-C(6)-H(6B)   | 109.1      | H(13A)-C(13)-H(13F) | 56.3       |
| H(6A)-C(6)-H(6B)  | 107.8      | H(13B)-C(13)-H(13F) | 56.3       |
| C(12)-C(7)-C(8)   | 120.5(2)   | H(13C)-C(13)-H(13F) | 141.1      |
| C(12)-C(7)-S(1)   | 119.79(15) | H(13D)-C(13)-H(13F) | 109.5      |
| C(8)-C(7)-S(1)    | 119.70(18) | H(13E)-C(13)-H(13F) | 109.5      |
| C(9)-C(8)-C(7)    | 119.3(2)   | N(2)-C(14)-C(19)    | 122.93(18) |
| C(9)-C(8)-H(8)    | 120.4      | N(2)-C(14)-C(15)    | 119.03(17) |
| C(7)-C(8)-H(8)    | 120.4      | C(19)-C(14)-C(15)   | 117.97(17) |
| C(10)-C(9)-C(8)   | 121.7(2)   | C(16)-C(15)-C(14)   | 121.15(18) |
| C(10)-C(9)-H(9)   | 119.1      | C(16)-C(15)-H(15)   | 119.4      |
| C(8)-C(9)-H(9)    | 119.1      | C(14)-C(15)-H(15)   | 119.4      |
| C(9)-C(10)-C(11)  | 118.4(2)   | C(15)-C(16)-C(17)   | 120.55(18) |
| C(9)-C(10)-C(13)  | 121.3(2)   | C(15)-C(16)-H(16)   | 119.7      |
| C(11)-C(10)-C(13) | 120.3(3)   | C(17)-C(16)-H(16)   | 119.7      |
| C(12)-C(11)-C(10) | 120.9(2)   | O(3)-C(17)-C(18)    | 125.16(17) |
| C(12)-C(11)-H(11) | 119.6      | O(3)-C(17)-C(16)    | 115.50(17) |
| C(10)-C(11)-H(11) | 119.6      | C(18)-C(17)-C(16)   | 119.34(17) |
| C(11)-C(12)-C(7)  | 119.3(2)   | C(17)-C(18)-C(19)   | 120.06(18) |
| C(11)-C(12)-H(12) | 120.4      | C(17)-C(18)-H(18)   | 120.0      |

|                     |            |                     |            |
|---------------------|------------|---------------------|------------|
| C(19)-C(18)-H(18)   | 120.0      | N(4)-C(23)-C(22)    | 107.70(15) |
| C(14)-C(19)-C(18)   | 120.93(18) | C(24)-C(23)-C(22)   | 110.30(16) |
| C(14)-C(19)-H(19)   | 119.5      | N(4)-C(23)-H(23)    | 108.8      |
| C(18)-C(19)-H(19)   | 119.5      | C(24)-C(23)-H(23)   | 108.8      |
| O(3)-C(20)-H(20A)   | 109.5      | C(22)-C(23)-H(23)   | 108.8      |
| O(3)-C(20)-H(20B)   | 109.5      | C(23)-C(24)-C(25)   | 113.24(15) |
| H(20A)-C(20)-H(20B) | 109.5      | C(23)-C(24)-H(24A)  | 108.9      |
| O(3)-C(20)-H(20C)   | 109.5      | C(25)-C(24)-H(24A)  | 108.9      |
| H(20A)-C(20)-H(20C) | 109.5      | C(23)-C(24)-H(24B)  | 108.9      |
| H(20B)-C(20)-H(20C) | 109.5      | C(25)-C(24)-H(24B)  | 108.9      |
| O(5)-S(2)-O(4)      | 118.54(9)  | H(24A)-C(24)-H(24B) | 107.7      |
| O(5)-S(2)-N(3)      | 110.46(9)  | C(24)-C(25)-C(26)   | 110.64(16) |
| O(4)-S(2)-N(3)      | 105.99(8)  | C(24)-C(25)-H(25A)  | 109.5      |
| O(5)-S(2)-C(27)     | 106.70(8)  | C(26)-C(25)-H(25A)  | 109.5      |
| O(4)-S(2)-C(27)     | 108.21(9)  | C(24)-C(25)-H(25B)  | 109.5      |
| N(3)-S(2)-C(27)     | 106.32(9)  | C(26)-C(25)-H(25B)  | 109.5      |
| C(37)-O(6)-C(40)    | 117.35(16) | H(25A)-C(25)-H(25B) | 108.1      |
| C(21)-N(3)-S(2)     | 121.03(13) | C(21)-C(26)-C(25)   | 111.85(16) |
| C(21)-N(3)-H(3A)    | 125.7(17)  | C(21)-C(26)-H(26A)  | 109.2      |
| S(2)-N(3)-H(3A)     | 113.2(17)  | C(25)-C(26)-H(26A)  | 109.2      |
| C(34)-N(4)-C(23)    | 123.94(16) | C(21)-C(26)-H(26B)  | 109.2      |
| C(34)-N(4)-H(4)     | 113.1(15)  | C(25)-C(26)-H(26B)  | 109.2      |
| C(23)-N(4)-H(4)     | 113.2(16)  | H(26A)-C(26)-H(26B) | 107.9      |
| N(3)-C(21)-C(26)    | 110.27(16) | C(28)-C(27)-C(32)   | 120.42(18) |
| N(3)-C(21)-C(22)    | 111.64(16) | C(28)-C(27)-S(2)    | 120.10(15) |
| C(26)-C(21)-C(22)   | 111.58(15) | C(32)-C(27)-S(2)    | 119.48(14) |
| N(3)-C(21)-H(21)    | 107.7      | C(29)-C(28)-C(27)   | 119.37(18) |
| C(26)-C(21)-H(21)   | 107.7      | C(29)-C(28)-H(28)   | 120.3      |
| C(22)-C(21)-H(21)   | 107.7      | C(27)-C(28)-H(28)   | 120.3      |
| C(23)-C(22)-C(21)   | 111.98(15) | C(28)-C(29)-C(30)   | 121.24(18) |
| C(23)-C(22)-H(22A)  | 109.2      | C(28)-C(29)-H(29)   | 119.4      |
| C(21)-C(22)-H(22A)  | 109.2      | C(30)-C(29)-H(29)   | 119.4      |
| C(23)-C(22)-H(22B)  | 109.2      | C(29)-C(30)-C(31)   | 118.37(18) |
| C(21)-C(22)-H(22B)  | 109.2      | C(29)-C(30)-C(33)   | 121.30(18) |
| H(22A)-C(22)-H(22B) | 107.9      | C(31)-C(30)-C(33)   | 120.33(19) |
| N(4)-C(23)-C(24)    | 112.26(15) | C(32)-C(31)-C(30)   | 121.05(19) |

|                     |            |                     |            |
|---------------------|------------|---------------------|------------|
| C(32)-C(31)-H(31)   | 119.5      | C(37)-C(36)-H(36)   | 120.0      |
| C(30)-C(31)-H(31)   | 119.5      | C(35)-C(36)-H(36)   | 120.0      |
| C(31)-C(32)-C(27)   | 119.54(18) | O(6)-C(37)-C(38)    | 115.66(17) |
| C(31)-C(32)-H(32)   | 120.2      | O(6)-C(37)-C(36)    | 125.35(18) |
| C(27)-C(32)-H(32)   | 120.2      | C(38)-C(37)-C(36)   | 118.99(18) |
| C(30)-C(33)-H(33A)  | 109.5      | C(39)-C(38)-C(37)   | 120.85(18) |
| C(30)-C(33)-H(33B)  | 109.5      | C(39)-C(38)-H(38)   | 119.6      |
| H(33A)-C(33)-H(33B) | 109.5      | C(37)-C(38)-H(38)   | 119.6      |
| C(30)-C(33)-H(33C)  | 109.5      | C(38)-C(39)-C(34)   | 121.07(19) |
| H(33A)-C(33)-H(33C) | 109.5      | C(38)-C(39)-H(39)   | 119.5      |
| H(33B)-C(33)-H(33C) | 109.5      | C(34)-C(39)-H(39)   | 119.5      |
| C(35)-C(34)-N(4)    | 124.09(17) | O(6)-C(40)-H(40A)   | 109.5      |
| C(35)-C(34)-C(39)   | 117.63(18) | O(6)-C(40)-H(40B)   | 109.5      |
| N(4)-C(34)-C(39)    | 118.11(18) | H(40A)-C(40)-H(40B) | 109.5      |
| C(34)-C(35)-C(36)   | 121.37(18) | O(6)-C(40)-H(40C)   | 109.5      |
| C(34)-C(35)-H(35)   | 119.3      | H(40A)-C(40)-H(40C) | 109.5      |
| C(36)-C(35)-H(35)   | 119.3      | H(40B)-C(40)-H(40C) | 109.5      |
| C(37)-C(36)-C(35)   | 119.95(18) |                     |            |

---



**Table S4. Anisotropic displacement parameters ( $\text{\AA}^2 \times 10^3$ ) for ( $\pm$ )-*trans*-7d. The anisotropic displacement factor exponent takes the form:  $-2\pi^2 [h^2 a^{*2} U^{11} + \dots + 2 h k a^* b^* U^{12}]$**

|       | U <sup>11</sup> | U <sup>22</sup> | U <sup>33</sup> | U <sup>23</sup> | U <sup>13</sup> | U <sup>12</sup> |
|-------|-----------------|-----------------|-----------------|-----------------|-----------------|-----------------|
| S(1)  | 23(1)           | 25(1)           | 18(1)           | 2(1)            | 5(1)            | 14(1)           |
| O(1)  | 29(1)           | 34(1)           | 18(1)           | 0(1)            | 2(1)            | 17(1)           |
| O(2)  | 26(1)           | 41(1)           | 32(1)           | 6(1)            | 10(1)           | 22(1)           |
| O(3)  | 21(1)           | 13(1)           | 39(1)           | 0(1)            | 10(1)           | 2(1)            |
| N(1)  | 26(1)           | 20(1)           | 20(1)           | 3(1)            | 8(1)            | 12(1)           |
| N(2)  | 23(1)           | 15(1)           | 30(1)           | -3(1)           | 12(1)           | 2(1)            |
| C(1)  | 23(1)           | 14(1)           | 17(1)           | 0(1)            | 5(1)            | 4(1)            |
| C(2)  | 20(1)           | 14(1)           | 21(1)           | 1(1)            | 6(1)            | 5(1)            |
| C(3)  | 18(1)           | 14(1)           | 21(1)           | 2(1)            | 5(1)            | 4(1)            |
| C(4)  | 28(1)           | 21(1)           | 21(1)           | 5(1)            | 3(1)            | 10(1)           |
| C(5)  | 20(1)           | 33(1)           | 25(1)           | 7(1)            | 0(1)            | 10(1)           |
| C(6)  | 18(1)           | 27(1)           | 22(1)           | 0(1)            | 1(1)            | -2(1)           |
| C(7)  | 34(1)           | 22(1)           | 18(1)           | 5(1)            | 2(1)            | 14(1)           |
| C(8)  | 48(2)           | 29(1)           | 28(1)           | 5(1)            | 10(1)           | 22(1)           |
| C(9)  | 60(2)           | 26(1)           | 32(1)           | 3(1)            | 2(1)            | 19(1)           |
| C(10) | 61(2)           | 24(1)           | 29(1)           | 10(1)           | -16(1)          | 10(1)           |
| C(11) | 32(1)           | 37(1)           | 41(1)           | 12(1)           | -6(1)           | 7(1)            |
| C(12) | 31(1)           | 29(1)           | 31(1)           | 7(1)            | 1(1)            | 15(1)           |
| C(13) | 68(2)           | 29(1)           | 55(2)           | 12(1)           | -25(1)          | 4(1)            |
| C(14) | 17(1)           | 16(1)           | 23(1)           | 0(1)            | 1(1)            | 4(1)            |
| C(15) | 17(1)           | 20(1)           | 22(1)           | 0(1)            | 3(1)            | 6(1)            |
| C(16) | 14(1)           | 20(1)           | 23(1)           | 5(1)            | 4(1)            | 3(1)            |
| C(17) | 15(1)           | 14(1)           | 25(1)           | 2(1)            | 1(1)            | 3(1)            |
| C(18) | 19(1)           | 18(1)           | 26(1)           | -2(1)           | 5(1)            | 6(1)            |
| C(19) | 18(1)           | 18(1)           | 26(1)           | 1(1)            | 8(1)            | 2(1)            |
| C(20) | 30(1)           | 18(1)           | 45(1)           | -5(1)           | 10(1)           | 4(1)            |
| S(2)  | 27(1)           | 15(1)           | 17(1)           | 2(1)            | 3(1)            | 11(1)           |
| O(4)  | 49(1)           | 22(1)           | 16(1)           | 2(1)            | 3(1)            | 18(1)           |
| O(5)  | 24(1)           | 23(1)           | 33(1)           | 5(1)            | 9(1)            | 9(1)            |
| O(6)  | 24(1)           | 18(1)           | 38(1)           | 4(1)            | 5(1)            | 4(1)            |
| N(3)  | 38(1)           | 17(1)           | 17(1)           | -1(1)           | -4(1)           | 17(1)           |

|       |       |       |       |       |       |       |
|-------|-------|-------|-------|-------|-------|-------|
| N(4)  | 18(1) | 21(1) | 31(1) | 7(1)  | -4(1) | 4(1)  |
| C(21) | 28(1) | 14(1) | 16(1) | 2(1)  | 0(1)  | 9(1)  |
| C(22) | 20(1) | 19(1) | 22(1) | 2(1)  | 1(1)  | 10(1) |
| C(23) | 16(1) | 17(1) | 22(1) | 2(1)  | 1(1)  | 5(1)  |
| C(24) | 21(1) | 17(1) | 20(1) | -2(1) | 1(1)  | 8(1)  |
| C(25) | 17(1) | 25(1) | 19(1) | 2(1)  | 4(1)  | 8(1)  |
| C(26) | 22(1) | 20(1) | 20(1) | 3(1)  | 4(1)  | 4(1)  |
| C(27) | 24(1) | 14(1) | 13(1) | -1(1) | 1(1)  | 10(1) |
| C(28) | 21(1) | 20(1) | 17(1) | 0(1)  | -1(1) | 11(1) |
| C(29) | 30(1) | 18(1) | 19(1) | 2(1)  | 2(1)  | 12(1) |
| C(30) | 28(1) | 18(1) | 19(1) | -2(1) | 5(1)  | 9(1)  |
| C(31) | 20(1) | 25(1) | 30(1) | -2(1) | 4(1)  | 10(1) |
| C(32) | 25(1) | 22(1) | 24(1) | 0(1)  | 0(1)  | 15(1) |
| C(33) | 35(1) | 22(1) | 37(1) | 4(1)  | 14(1) | 9(1)  |
| C(34) | 14(1) | 20(1) | 26(1) | 3(1)  | 5(1)  | 5(1)  |
| C(35) | 15(1) | 20(1) | 29(1) | 2(1)  | 0(1)  | 3(1)  |
| C(36) | 18(1) | 22(1) | 28(1) | 4(1)  | 3(1)  | 9(1)  |
| C(37) | 18(1) | 16(1) | 30(1) | 1(1)  | 9(1)  | 6(1)  |
| C(38) | 17(1) | 24(1) | 26(1) | -5(1) | 2(1)  | 2(1)  |
| C(39) | 18(1) | 27(1) | 22(1) | 2(1)  | 2(1)  | 6(1)  |
| C(40) | 30(1) | 25(1) | 57(2) | 15(1) | 3(1)  | 7(1)  |

---

**Table S5. Hydrogen coordinates ( $\times 10^4$ ) and isotropic displacement parameters ( $\text{\AA}^2 \times 10^3$ ) for ( $\pm$ )-*trans*-7d.**

|        | x        | y        | z        | U(eq) |
|--------|----------|----------|----------|-------|
| H(1)   | 5150(20) | 4910(20) | 9249(12) | 34(7) |
| H(2)   | 9040(20) | 7400(20) | 7680(9)  | 27(6) |
| H(1A)  | 5839     | 3515     | 8264     | 22    |
| H(2A)  | 8106     | 5320     | 8471     | 23    |
| H(2B)  | 7432     | 5172     | 7695     | 23    |
| H(3)   | 7337     | 7122     | 8734     | 21    |
| H(4A)  | 6203     | 6816     | 7328     | 27    |
| H(4B)  | 6194     | 7974     | 7877     | 27    |
| H(5A)  | 4593     | 6386     | 8505     | 31    |
| H(5B)  | 3917     | 6203     | 7727     | 31    |
| H(6A)  | 3721     | 4090     | 8166     | 30    |
| H(6B)  | 4565     | 4335     | 7494     | 30    |
| H(8)   | 6272     | 1189     | 9036     | 39    |
| H(9)   | 4606     | -977     | 8853     | 46    |
| H(11)  | 1589     | 278      | 9605     | 45    |
| H(12)  | 3251     | 2458     | 9801     | 35    |
| H(13A) | 947      | -2013    | 9247     | 67    |
| H(13B) | 1748     | -2301    | 8613     | 67    |
| H(13C) | 2209     | -2594    | 9368     | 67    |
| H(13D) | 2322     | -2593    | 8905     | 67    |
| H(13E) | 1521     | -2305    | 9539     | 67    |
| H(13F) | 1060     | -2012    | 8785     | 67    |
| H(15)  | 10816    | 9437     | 7479     | 24    |
| H(16)  | 11817    | 11747    | 7689     | 23    |
| H(18)  | 8981     | 11652    | 9076     | 25    |
| H(19)  | 7971     | 9310     | 8869     | 26    |
| H(20A) | 9675     | 13875    | 8872     | 48    |
| H(20B) | 11253    | 14974    | 9007     | 48    |
| H(20C) | 10801    | 13677    | 9436     | 48    |
| H(3A)  | 5240(30) | -110(20) | 5699(12) | 36(7) |

|        |          |          |         |       |
|--------|----------|----------|---------|-------|
| H(4)   | 9370(20) | 2930(20) | 7308(9) | 25(6) |
| H(21)  | 6303     | -1316    | 6719    | 23    |
| H(22A) | 8043     | 609      | 7249    | 23    |
| H(22B) | 8337     | 534      | 6460    | 23    |
| H(23)  | 7311     | 2157     | 6226    | 22    |
| H(24A) | 6368     | 3134     | 7078    | 23    |
| H(24B) | 6778     | 2269     | 7643    | 23    |
| H(25A) | 4589     | 1212     | 6527    | 24    |
| H(25B) | 4320     | 1283     | 7321    | 24    |
| H(26A) | 5348     | -341     | 7538    | 26    |
| H(26B) | 4143     | -935     | 6910    | 26    |
| H(28)  | 6437     | -3918    | 5857    | 22    |
| H(29)  | 4971     | -6025    | 6138    | 25    |
| H(31)  | 1468     | -5063    | 5670    | 29    |
| H(32)  | 2920     | -2953    | 5394    | 27    |
| H(33A) | 1590     | -7659    | 5702    | 47    |
| H(33B) | 1442     | -7011    | 6433    | 47    |
| H(33C) | 2705     | -7581    | 6341    | 47    |
| H(35)  | 7994     | 4285     | 5981    | 27    |
| H(36)  | 8987     | 6517     | 5708    | 27    |
| H(38)  | 12005    | 7253     | 7306    | 28    |
| H(39)  | 11033    | 5044     | 7571    | 27    |
| H(40A) | 10908    | 8269     | 5329    | 56    |
| H(40B) | 11539    | 9781     | 5666    | 56    |
| H(40C) | 9917     | 8866     | 5746    | 56    |

---

**Table S6. Torsion angles [°] for (±)-*trans*-7d.**

---

|                         |             |
|-------------------------|-------------|
| O(2)-S(1)-N(1)-C(1)     | 50.04(17)   |
| O(1)-S(1)-N(1)-C(1)     | 178.89(14)  |
| C(7)-S(1)-N(1)-C(1)     | -65.89(17)  |
| S(1)-N(1)-C(1)-C(6)     | 138.66(15)  |
| S(1)-N(1)-C(1)-C(2)     | -97.67(17)  |
| N(1)-C(1)-C(2)-C(3)     | -69.0(2)    |
| C(6)-C(1)-C(2)-C(3)     | 53.5(2)     |
| C(14)-N(2)-C(3)-C(4)    | 68.3(2)     |
| C(14)-N(2)-C(3)-C(2)    | -169.28(17) |
| C(1)-C(2)-C(3)-N(2)     | 179.79(15)  |
| C(1)-C(2)-C(3)-C(4)     | -56.0(2)    |
| N(2)-C(3)-C(4)-C(5)     | 179.05(16)  |
| C(2)-C(3)-C(4)-C(5)     | 57.6(2)     |
| C(3)-C(4)-C(5)-C(6)     | -56.0(2)    |
| N(1)-C(1)-C(6)-C(5)     | 70.4(2)     |
| C(2)-C(1)-C(6)-C(5)     | -52.0(2)    |
| C(4)-C(5)-C(6)-C(1)     | 52.9(2)     |
| O(2)-S(1)-C(7)-C(12)    | 174.13(16)  |
| O(1)-S(1)-C(7)-C(12)    | 45.26(18)   |
| N(1)-S(1)-C(7)-C(12)    | -69.11(18)  |
| O(2)-S(1)-C(7)-C(8)     | -4.14(19)   |
| O(1)-S(1)-C(7)-C(8)     | -133.01(16) |
| N(1)-S(1)-C(7)-C(8)     | 112.62(17)  |
| C(12)-C(7)-C(8)-C(9)    | -1.0(3)     |
| S(1)-C(7)-C(8)-C(9)     | 177.21(17)  |
| C(7)-C(8)-C(9)-C(10)    | 0.3(3)      |
| C(8)-C(9)-C(10)-C(11)   | 0.6(3)      |
| C(8)-C(9)-C(10)-C(13)   | -179.1(2)   |
| C(9)-C(10)-C(11)-C(12)  | -0.9(3)     |
| C(13)-C(10)-C(11)-C(12) | 178.8(2)    |
| C(10)-C(11)-C(12)-C(7)  | 0.2(3)      |
| C(8)-C(7)-C(12)-C(11)   | 0.8(3)      |
| S(1)-C(7)-C(12)-C(11)   | -177.50(16) |
| C(3)-N(2)-C(14)-C(19)   | 19.2(3)     |

|                         |             |
|-------------------------|-------------|
| C(3)-N(2)-C(14)-C(15)   | -164.00(18) |
| N(2)-C(14)-C(15)-C(16)  | -176.13(18) |
| C(19)-C(14)-C(15)-C(16) | 0.8(3)      |
| C(14)-C(15)-C(16)-C(17) | -0.5(3)     |
| C(20)-O(3)-C(17)-C(18)  | 3.9(3)      |
| C(20)-O(3)-C(17)-C(16)  | -176.73(18) |
| C(15)-C(16)-C(17)-O(3)  | -179.38(17) |
| C(15)-C(16)-C(17)-C(18) | 0.0(3)      |
| O(3)-C(17)-C(18)-C(19)  | 179.48(18)  |
| C(16)-C(17)-C(18)-C(19) | 0.1(3)      |
| N(2)-C(14)-C(19)-C(18)  | 176.16(19)  |
| C(15)-C(14)-C(19)-C(18) | -0.6(3)     |
| C(17)-C(18)-C(19)-C(14) | 0.2(3)      |
| O(5)-S(2)-N(3)-C(21)    | -48.60(18)  |
| O(4)-S(2)-N(3)-C(21)    | -178.20(15) |
| C(27)-S(2)-N(3)-C(21)   | 66.80(18)   |
| S(2)-N(3)-C(21)-C(26)   | -137.90(15) |
| S(2)-N(3)-C(21)-C(22)   | 97.46(17)   |
| N(3)-C(21)-C(22)-C(23)  | 68.9(2)     |
| C(26)-C(21)-C(22)-C(23) | -55.0(2)    |
| C(34)-N(4)-C(23)-C(24)  | -73.7(2)    |
| C(34)-N(4)-C(23)-C(22)  | 164.71(18)  |
| C(21)-C(22)-C(23)-N(4)  | 176.77(16)  |
| C(21)-C(22)-C(23)-C(24) | 53.9(2)     |
| N(4)-C(23)-C(24)-C(25)  | -174.41(16) |
| C(22)-C(23)-C(24)-C(25) | -54.3(2)    |
| C(23)-C(24)-C(25)-C(26) | 54.3(2)     |
| N(3)-C(21)-C(26)-C(25)  | -69.90(19)  |
| C(22)-C(21)-C(26)-C(25) | 54.8(2)     |
| C(24)-C(25)-C(26)-C(21) | -53.9(2)    |
| O(5)-S(2)-C(27)-C(28)   | 1.20(17)    |
| O(4)-S(2)-C(27)-C(28)   | 129.80(15)  |
| N(3)-S(2)-C(27)-C(28)   | -116.72(15) |
| O(5)-S(2)-C(27)-C(32)   | -177.69(14) |
| O(4)-S(2)-C(27)-C(32)   | -49.09(17)  |
| N(3)-S(2)-C(27)-C(32)   | 64.40(16)   |

|                         |             |
|-------------------------|-------------|
| C(32)-C(27)-C(28)-C(29) | 0.5(3)      |
| S(2)-C(27)-C(28)-C(29)  | -178.37(13) |
| C(27)-C(28)-C(29)-C(30) | -0.3(3)     |
| C(28)-C(29)-C(30)-C(31) | 0.2(3)      |
| C(28)-C(29)-C(30)-C(33) | -179.97(17) |
| C(29)-C(30)-C(31)-C(32) | -0.4(3)     |
| C(33)-C(30)-C(31)-C(32) | 179.79(18)  |
| C(30)-C(31)-C(32)-C(27) | 0.6(3)      |
| C(28)-C(27)-C(32)-C(31) | -0.7(3)     |
| S(2)-C(27)-C(32)-C(31)  | 178.20(15)  |
| C(23)-N(4)-C(34)-C(35)  | -25.3(3)    |
| C(23)-N(4)-C(34)-C(39)  | 159.48(19)  |
| N(4)-C(34)-C(35)-C(36)  | -171.84(19) |
| C(39)-C(34)-C(35)-C(36) | 3.4(3)      |
| C(34)-C(35)-C(36)-C(37) | -0.5(3)     |
| C(40)-O(6)-C(37)-C(38)  | 172.80(19)  |
| C(40)-O(6)-C(37)-C(36)  | -6.7(3)     |
| C(35)-C(36)-C(37)-O(6)  | 176.81(18)  |
| C(35)-C(36)-C(37)-C(38) | -2.6(3)     |
| O(6)-C(37)-C(38)-C(39)  | -176.63(18) |
| C(36)-C(37)-C(38)-C(39) | 2.9(3)      |
| C(37)-C(38)-C(39)-C(34) | 0.1(3)      |
| C(35)-C(34)-C(39)-C(38) | -3.1(3)     |
| N(4)-C(34)-C(39)-C(38)  | 172.36(19)  |

---

**Table S7. Hydrogen bonds for ( $\pm$ )-*trans*-7d [ $\text{\AA}$  and  $^\circ$ ].**

| D-H...A             | d(D-H)    | d(H...A)  | d(D...A) | <(DHA) |
|---------------------|-----------|-----------|----------|--------|
| N(1)-H(1)...O(1)#1  | 0.855(16) | 2.055(17) | 2.892(2) | 166(2) |
| N(3)-H(3A)...O(4)#2 | 0.850(16) | 2.111(17) | 2.938(2) | 164(2) |

Symmetry transformations used to generate equivalent atoms:

#1 -x+1,-y+1,-z+2 #2 -x+1,-y,-z+1

## 7.2. ( $\pm$ )-*cis*-7d

Low-temperature diffraction data ( $\omega$ -scans) were collected on a Rigaku MicroMax-007HF diffractometer coupled to a Dectris Pilatus3R detector with Mo K $\alpha$  ( $\lambda = 0.71073 \text{ \AA}$ ) for the structure of ( $\pm$ )-*cis*-7d. The diffraction images were processed and scaled using Rigaku Oxford Diffraction software.<sup>1</sup> The structure was solved with SHELXT and was refined against  $F^2$  on all data by full-matrix least squares with SHELXL.<sup>2</sup> All non-hydrogen atoms were refined anisotropically. Hydrogen atoms were included in the model at geometrically calculated positions and refined using a riding model. The isotropic displacement parameters of all hydrogen atoms were fixed to 1.2 times the U value of the atoms to which they are linked (1.5 times for methyl groups). The only exceptions are H1 and H2, which were found in the difference map and freely refined (see Table 7). The full numbering scheme of compound ( $\pm$ )-*cis*-7d can be found in the full details of the X-ray structure determination (CIF), which is included as Supporting Information. CCDC number 1818210 (( $\pm$ )-*cis*-7d) contains the supplementary crystallographic data for this paper. These data can be obtained free of charge from The Cambridge Crystallographic Data Center via [www.ccdc.cam.ac.uk/data\\_request/cif](http://www.ccdc.cam.ac.uk/data_request/cif).



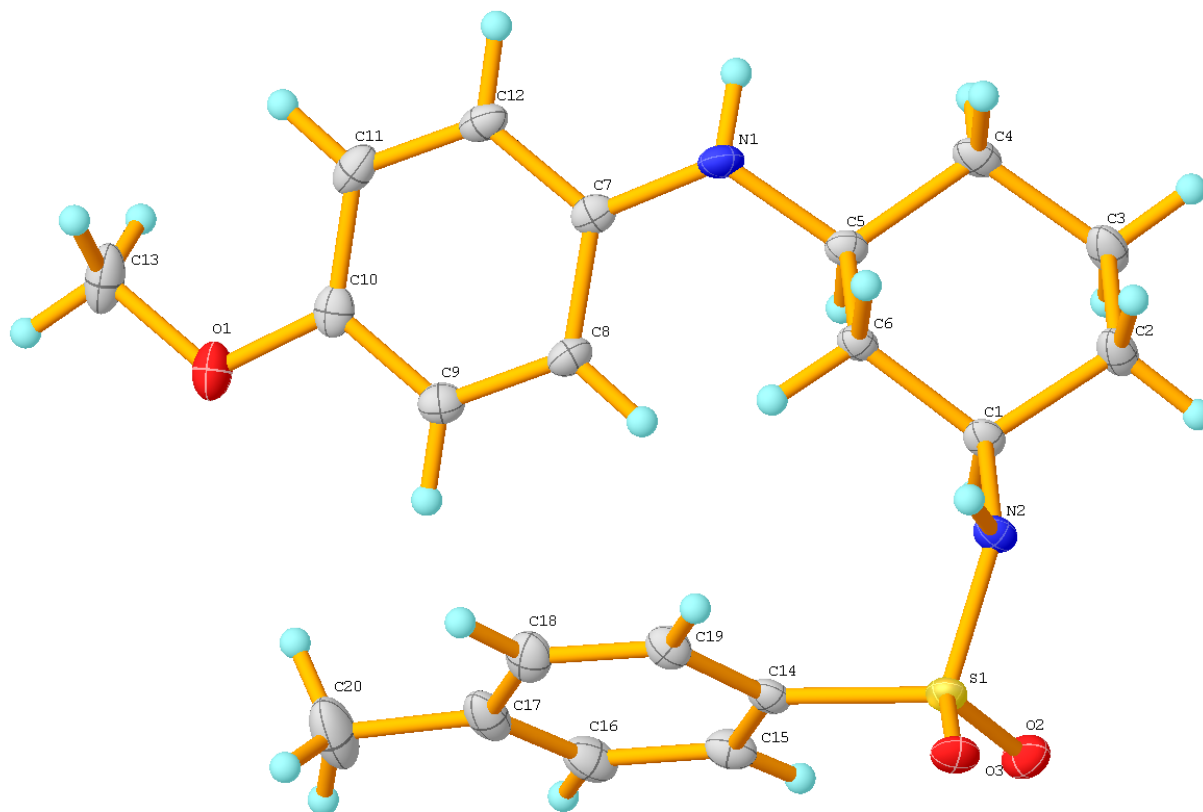

**Figure S2.** The complete numbering scheme of (±)-*cis*-7d with 50% thermal ellipsoid probability levels. The hydrogen atoms are shown as circles for clarity.

**Table S8. Crystal data and structure refinement for (±)-cis-7d.**

|                                   |                                                                 |                  |
|-----------------------------------|-----------------------------------------------------------------|------------------|
| Identification code               | (±)-cis-7d                                                      |                  |
| Empirical formula                 | C <sub>20</sub> H <sub>26</sub> N <sub>2</sub> O <sub>3</sub> S |                  |
| Formula weight                    | 374.49                                                          |                  |
| Temperature                       | 93(2) K                                                         |                  |
| Wavelength                        | 0.71073 Å                                                       |                  |
| Crystal system                    | Triclinic                                                       |                  |
| Space group                       | P-1                                                             |                  |
| Unit cell dimensions              | a = 9.7341(3) Å                                                 | α = 108.030(4)°. |
|                                   | b = 10.0802(5) Å                                                | β = 96.352(3)°.  |
|                                   | c = 10.7645(4) Å                                                | γ = 102.318(3)°. |
| Volume                            | 963.33(7) Å <sup>3</sup>                                        |                  |
| Z                                 | 2                                                               |                  |
| Density (calculated)              | 1.291 Mg/m <sup>3</sup>                                         |                  |
| Absorption coefficient            | 0.190 mm <sup>-1</sup>                                          |                  |
| F(000)                            | 400                                                             |                  |
| Crystal size                      | 0.200 x 0.100 x 0.040 mm <sup>3</sup>                           |                  |
| Crystal color and habit           | Colorless Plate                                                 |                  |
| Diffractometer                    | Dectris Pilatus 3R                                              |                  |
| Theta range for data collection   | 3.134 to 27.483°.                                               |                  |
| Index ranges                      | -12 ≤ h ≤ 12, -13 ≤ k ≤ 13, -13 ≤ l ≤ 13                        |                  |
| Reflections collected             | 22946                                                           |                  |
| Independent reflections           | 4400 [R(int) = 0.0271]                                          |                  |
| Observed reflections (I > 2σ(I))  | 3841                                                            |                  |
| Completeness to theta = 25.242°   | 99.8 %                                                          |                  |
| Absorption correction             | Semi-empirical from equivalents                                 |                  |
| Max. and min. transmission        | 1.00000 and 0.57899                                             |                  |
| Solution method                   | SHELXT-2014/5 (Sheldrick, 2014)                                 |                  |
| Refinement method                 | SHELXL-2014/7 (Sheldrick, 2014)                                 |                  |
| Data / restraints / parameters    | 4400 / 0 / 245                                                  |                  |
| Goodness-of-fit on F <sup>2</sup> | 1.029                                                           |                  |
| Final R indices [I > 2σ(I)]       | R1 = 0.0334, wR2 = 0.0854                                       |                  |
| R indices (all data)              | R1 = 0.0400, wR2 = 0.0886                                       |                  |
| Largest diff. peak and hole       | 0.381 and -0.391 e.Å <sup>-3</sup>                              |                  |

**Table S9. Atomic coordinates ( $\times 10^4$ ) and equivalent isotropic displacement parameters ( $\text{\AA}^2 \times 10^3$ ) for ( $\pm$ )-*cis*-7d. U(eq) is defined as one third of the trace of the orthogonalized  $U_{ij}$  tensor.**

|       | x        | y       | z        | U(eq) |
|-------|----------|---------|----------|-------|
| S(1)  | 9852(1)  | 6086(1) | 8444(1)  | 15(1) |
| O(1)  | 2113(1)  | 711(1)  | 2854(1)  | 25(1) |
| O(2)  | 10313(1) | 7264(1) | 7977(1)  | 22(1) |
| O(3)  | 10934(1) | 5614(1) | 9108(1)  | 18(1) |
| N(1)  | 3553(1)  | 4891(1) | 7967(1)  | 18(1) |
| N(2)  | 8830(1)  | 6525(1) | 9509(1)  | 16(1) |
| C(1)  | 7512(1)  | 6920(1) | 9083(1)  | 15(1) |
| C(2)  | 7379(1)  | 8272(1) | 10156(1) | 21(1) |
| C(3)  | 6005(1)  | 8675(1) | 9760(1)  | 22(1) |
| C(4)  | 4666(1)  | 7414(1) | 9413(1)  | 20(1) |
| C(5)  | 4837(1)  | 6094(1) | 8324(1)  | 16(1) |
| C(6)  | 6176(1)  | 5676(1) | 8798(1)  | 15(1) |
| C(7)  | 3193(1)  | 3842(1) | 6686(1)  | 16(1) |
| C(8)  | 4172(1)  | 3662(1) | 5822(1)  | 18(1) |
| C(9)  | 3765(1)  | 2602(1) | 4567(1)  | 19(1) |
| C(10) | 2380(1)  | 1708(1) | 4126(1)  | 20(1) |
| C(11) | 1392(1)  | 1863(1) | 4968(1)  | 21(1) |
| C(12) | 1809(1)  | 2914(1) | 6234(1)  | 19(1) |
| C(13) | 662(2)   | -119(2) | 2307(2)  | 30(1) |
| C(14) | 8832(1)  | 4582(1) | 7062(1)  | 16(1) |
| C(15) | 8582(1)  | 4709(2) | 5811(1)  | 20(1) |
| C(16) | 7867(2)  | 3480(2) | 4722(1)  | 24(1) |
| C(17) | 7389(2)  | 2142(2) | 4867(1)  | 24(1) |
| C(18) | 7596(1)  | 2058(1) | 6149(1)  | 23(1) |
| C(19) | 8319(1)  | 3262(1) | 7242(1)  | 19(1) |
| C(20) | 6676(2)  | 795(2)  | 3675(2)  | 39(1) |

**Table S10. Bond lengths [Å] and angles [°] for (±)-*cis*-7d.**

|            |            |                  |            |
|------------|------------|------------------|------------|
| S(1)-O(2)  | 1.4338(9)  | C(9)-H(9)        | 0.9500     |
| S(1)-O(3)  | 1.4507(9)  | C(10)-C(11)      | 1.3927(19) |
| S(1)-N(2)  | 1.6210(10) | C(11)-C(12)      | 1.3943(19) |
| S(1)-C(14) | 1.7696(13) | C(11)-H(11)      | 0.9500     |
| O(1)-C(10) | 1.3820(16) | C(12)-H(12)      | 0.9500     |
| O(1)-C(13) | 1.4317(17) | C(13)-H(13A)     | 0.9800     |
| N(1)-C(7)  | 1.4048(17) | C(13)-H(13B)     | 0.9800     |
| N(1)-C(5)  | 1.4633(16) | C(13)-H(13C)     | 0.9800     |
| N(1)-H(1)  | 0.898(17)  | C(14)-C(15)      | 1.3918(17) |
| N(2)-C(1)  | 1.4882(15) | C(14)-C(19)      | 1.3985(17) |
| N(2)-H(2)  | 0.869(16)  | C(15)-C(16)      | 1.3948(19) |
| C(1)-C(6)  | 1.5280(17) | C(15)-H(15)      | 0.9500     |
| C(1)-C(2)  | 1.5301(17) | C(16)-C(17)      | 1.393(2)   |
| C(1)-H(1A) | 1.0000     | C(16)-H(16)      | 0.9500     |
| C(2)-C(3)  | 1.5325(17) | C(17)-C(18)      | 1.403(2)   |
| C(2)-H(2A) | 0.9900     | C(17)-C(20)      | 1.515(2)   |
| C(2)-H(2B) | 0.9900     | C(18)-C(19)      | 1.3857(19) |
| C(3)-C(4)  | 1.5319(19) | C(18)-H(18)      | 0.9500     |
| C(3)-H(3A) | 0.9900     | C(19)-H(19)      | 0.9500     |
| C(3)-H(3B) | 0.9900     | C(20)-H(20A)     | 0.9800     |
| C(4)-C(5)  | 1.5313(17) | C(20)-H(20B)     | 0.9800     |
| C(4)-H(4A) | 0.9900     | C(20)-H(20C)     | 0.9800     |
| C(4)-H(4B) | 0.9900     | O(2)-S(1)-O(3)   | 118.32(5)  |
| C(5)-C(6)  | 1.5349(16) | O(2)-S(1)-N(2)   | 108.86(6)  |
| C(5)-H(5)  | 1.0000     | O(3)-S(1)-N(2)   | 105.39(5)  |
| C(6)-H(6A) | 0.9900     | O(2)-S(1)-C(14)  | 107.72(6)  |
| C(6)-H(6B) | 0.9900     | O(3)-S(1)-C(14)  | 107.70(5)  |
| C(7)-C(12) | 1.4008(18) | N(2)-S(1)-C(14)  | 108.53(6)  |
| C(7)-C(8)  | 1.4042(17) | C(10)-O(1)-C(13) | 116.92(11) |
| C(8)-C(9)  | 1.3896(18) | C(7)-N(1)-C(5)   | 120.04(10) |
| C(8)-H(8)  | 0.9500     | C(7)-N(1)-H(1)   | 112.8(11)  |
| C(9)-C(10) | 1.3897(18) | C(5)-N(1)-H(1)   | 113.2(11)  |
|            |            | C(1)-N(2)-S(1)   | 118.91(8)  |
|            |            | C(1)-N(2)-H(2)   | 115.6(11)  |
|            |            | S(1)-N(2)-H(2)   | 111.9(10)  |

|                  |            |                     |            |
|------------------|------------|---------------------|------------|
| N(2)-C(1)-C(6)   | 111.34(9)  | C(12)-C(7)-C(8)     | 117.48(12) |
| N(2)-C(1)-C(2)   | 109.77(10) | C(12)-C(7)-N(1)     | 119.71(11) |
| C(6)-C(1)-C(2)   | 110.33(10) | C(8)-C(7)-N(1)      | 122.81(11) |
| N(2)-C(1)-H(1A)  | 108.4      | C(9)-C(8)-C(7)      | 120.57(11) |
| C(6)-C(1)-H(1A)  | 108.4      | C(9)-C(8)-H(8)      | 119.7      |
| C(2)-C(1)-H(1A)  | 108.4      | C(7)-C(8)-H(8)      | 119.7      |
| C(1)-C(2)-C(3)   | 110.83(10) | C(8)-C(9)-C(10)     | 121.19(12) |
| C(1)-C(2)-H(2A)  | 109.5      | C(8)-C(9)-H(9)      | 119.4      |
| C(3)-C(2)-H(2A)  | 109.5      | C(10)-C(9)-H(9)     | 119.4      |
| C(1)-C(2)-H(2B)  | 109.5      | O(1)-C(10)-C(9)     | 115.28(12) |
| C(3)-C(2)-H(2B)  | 109.5      | O(1)-C(10)-C(11)    | 125.52(12) |
| H(2A)-C(2)-H(2B) | 108.1      | C(9)-C(10)-C(11)    | 119.20(12) |
| C(4)-C(3)-C(2)   | 112.53(11) | C(10)-C(11)-C(12)   | 119.52(12) |
| C(4)-C(3)-H(3A)  | 109.1      | C(10)-C(11)-H(11)   | 120.2      |
| C(2)-C(3)-H(3A)  | 109.1      | C(12)-C(11)-H(11)   | 120.2      |
| C(4)-C(3)-H(3B)  | 109.1      | C(11)-C(12)-C(7)    | 122.03(12) |
| C(2)-C(3)-H(3B)  | 109.1      | C(11)-C(12)-H(12)   | 119.0      |
| H(3A)-C(3)-H(3B) | 107.8      | C(7)-C(12)-H(12)    | 119.0      |
| C(5)-C(4)-C(3)   | 110.17(10) | O(1)-C(13)-H(13A)   | 109.5      |
| C(5)-C(4)-H(4A)  | 109.6      | O(1)-C(13)-H(13B)   | 109.5      |
| C(3)-C(4)-H(4A)  | 109.6      | H(13A)-C(13)-H(13B) | 109.5      |
| C(5)-C(4)-H(4B)  | 109.6      | O(1)-C(13)-H(13C)   | 109.5      |
| C(3)-C(4)-H(4B)  | 109.6      | H(13A)-C(13)-H(13C) | 109.5      |
| H(4A)-C(4)-H(4B) | 108.1      | H(13B)-C(13)-H(13C) | 109.5      |
| N(1)-C(5)-C(4)   | 110.67(10) | C(15)-C(14)-C(19)   | 120.79(12) |
| N(1)-C(5)-C(6)   | 111.47(10) | C(15)-C(14)-S(1)    | 120.18(10) |
| C(4)-C(5)-C(6)   | 109.44(10) | C(19)-C(14)-S(1)    | 119.00(9)  |
| N(1)-C(5)-H(5)   | 108.4      | C(14)-C(15)-C(16)   | 118.97(12) |
| C(4)-C(5)-H(5)   | 108.4      | C(14)-C(15)-H(15)   | 120.5      |
| C(6)-C(5)-H(5)   | 108.4      | C(16)-C(15)-H(15)   | 120.5      |
| C(1)-C(6)-C(5)   | 110.35(9)  | C(17)-C(16)-C(15)   | 121.31(12) |
| C(1)-C(6)-H(6A)  | 109.6      | C(17)-C(16)-H(16)   | 119.3      |
| C(5)-C(6)-H(6A)  | 109.6      | C(15)-C(16)-H(16)   | 119.3      |
| C(1)-C(6)-H(6B)  | 109.6      | C(16)-C(17)-C(18)   | 118.52(12) |
| C(5)-C(6)-H(6B)  | 109.6      | C(16)-C(17)-C(20)   | 121.27(13) |
| H(6A)-C(6)-H(6B) | 108.1      | C(18)-C(17)-C(20)   | 120.21(14) |

|                     |            |
|---------------------|------------|
| C(19)-C(18)-C(17)   | 121.06(12) |
| C(19)-C(18)-H(18)   | 119.5      |
| C(17)-C(18)-H(18)   | 119.5      |
| C(18)-C(19)-C(14)   | 119.25(12) |
| C(18)-C(19)-H(19)   | 120.4      |
| C(14)-C(19)-H(19)   | 120.4      |
| C(17)-C(20)-H(20A)  | 109.5      |
| C(17)-C(20)-H(20B)  | 109.5      |
| H(20A)-C(20)-H(20B) | 109.5      |
| C(17)-C(20)-H(20C)  | 109.5      |
| H(20A)-C(20)-H(20C) | 109.5      |
| H(20B)-C(20)-H(20C) | 109.5      |

---

**Table S11. Anisotropic displacement parameters ( $\text{\AA}^2 \times 10^3$ ) for ( $\pm$ )-*cis*-7d. The anisotropic displacement factor exponent takes the form:  $-2\pi^2 [ h^2 a^{*2} U_{11} + \dots + 2 h k a^* b^* U_{12} ]$** 

|       | U11   | U22   | U33   | U23   | U13    | U12   |
|-------|-------|-------|-------|-------|--------|-------|
| S(1)  | 12(1) | 16(1) | 18(1) | 6(1)  | 4(1)   | 6(1)  |
| O(1)  | 27(1) | 19(1) | 22(1) | 3(1)  | -3(1)  | 1(1)  |
| O(2)  | 20(1) | 19(1) | 29(1) | 12(1) | 7(1)   | 6(1)  |
| O(3)  | 13(1) | 24(1) | 22(1) | 9(1)  | 4(1)   | 9(1)  |
| N(1)  | 11(1) | 23(1) | 20(1) | 7(1)  | 5(1)   | 6(1)  |
| N(2)  | 14(1) | 19(1) | 16(1) | 6(1)  | 3(1)   | 9(1)  |
| C(1)  | 13(1) | 18(1) | 17(1) | 5(1)  | 1(1)   | 8(1)  |
| C(2)  | 18(1) | 20(1) | 22(1) | 0(1)  | -1(1)  | 10(1) |
| C(3)  | 20(1) | 19(1) | 24(1) | 1(1)  | 1(1)   | 11(1) |
| C(4)  | 17(1) | 24(1) | 21(1) | 6(1)  | 5(1)   | 12(1) |
| C(5)  | 12(1) | 19(1) | 17(1) | 6(1)  | 3(1)   | 7(1)  |
| C(6)  | 13(1) | 17(1) | 16(1) | 5(1)  | 4(1)   | 7(1)  |
| C(7)  | 14(1) | 18(1) | 20(1) | 10(1) | 2(1)   | 6(1)  |
| C(8)  | 12(1) | 21(1) | 21(1) | 8(1)  | 2(1)   | 3(1)  |
| C(9)  | 18(1) | 21(1) | 20(1) | 9(1)  | 5(1)   | 6(1)  |
| C(10) | 22(1) | 15(1) | 21(1) | 7(1)  | -1(1)  | 4(1)  |
| C(11) | 15(1) | 17(1) | 31(1) | 11(1) | 0(1)   | 2(1)  |
| C(12) | 13(1) | 20(1) | 28(1) | 12(1) | 6(1)   | 6(1)  |
| C(13) | 28(1) | 17(1) | 36(1) | 4(1)  | -11(1) | 2(1)  |
| C(14) | 14(1) | 18(1) | 17(1) | 5(1)  | 5(1)   | 9(1)  |
| C(15) | 21(1) | 25(1) | 20(1) | 10(1) | 7(1)   | 11(1) |
| C(16) | 24(1) | 33(1) | 17(1) | 7(1)  | 4(1)   | 14(1) |
| C(17) | 22(1) | 26(1) | 23(1) | 0(1)  | 1(1)   | 14(1) |
| C(18) | 22(1) | 18(1) | 28(1) | 6(1)  | 2(1)   | 9(1)  |
| C(19) | 20(1) | 20(1) | 19(1) | 7(1)  | 4(1)   | 9(1)  |
| C(20) | 42(1) | 33(1) | 30(1) | -6(1) | -7(1)  | 15(1) |

**Table S12. Hydrogen coordinates (  $\times 10^4$ ) and isotropic displacement parameters ( $\text{\AA}^2 \times 10^3$ ) for ( $\pm$ )-*cis*-7d.**

|        | x        | y        | z        | U(eq) |
|--------|----------|----------|----------|-------|
| H(1)   | 2791(19) | 5162(18) | 8257(17) | 28(4) |
| H(2)   | 8734(17) | 5973(17) | 9990(16) | 22(4) |
| H(1A)  | 7596     | 7144     | 8247     | 19    |
| H(2A)  | 8219     | 9087     | 10285    | 26    |
| H(2B)  | 7369     | 8093     | 11009    | 26    |
| H(3A)  | 5903     | 9497     | 10504    | 26    |
| H(3B)  | 6084     | 8994     | 8982     | 26    |
| H(4A)  | 4513     | 7166     | 10217    | 24    |
| H(4B)  | 3817     | 7702     | 9102     | 24    |
| H(5)   | 4974     | 6362     | 7518     | 19    |
| H(6A)  | 6075     | 5439     | 9615     | 18    |
| H(6B)  | 6275     | 4808     | 8104     | 18    |
| H(8)   | 5121     | 4270     | 6099     | 22    |
| H(9)   | 4446     | 2487     | 4001     | 23    |
| H(11)  | 442      | 1258     | 4683     | 26    |
| H(12)  | 1133     | 3003     | 6808     | 23    |
| H(13A) | 600      | -757     | 1395     | 46    |
| H(13B) | 48       | 534      | 2300     | 46    |
| H(13C) | 344      | -703     | 2851     | 46    |
| H(15)  | 8894     | 5618     | 5700     | 24    |
| H(16)  | 7703     | 3558     | 3863     | 29    |
| H(18)  | 7235     | 1163     | 6269     | 27    |
| H(19)  | 8464     | 3190     | 8104     | 22    |
| H(20A) | 7052     | -9       | 3755     | 58    |
| H(20B) | 6876     | 972      | 2859     | 58    |
| H(20C) | 5639     | 550      | 3640     | 58    |



**Table S13. Torsion angles [°] for (±)-cis-7d.**

|                        |             |
|------------------------|-------------|
| O(2)-S(1)-N(2)-C(1)    | 58.24(10)   |
| O(3)-S(1)-N(2)-C(1)    | -173.88(9)  |
| C(14)-S(1)-N(2)-C(1)   | -58.74(10)  |
| S(1)-N(2)-C(1)-C(6)    | 102.19(10)  |
| S(1)-N(2)-C(1)-C(2)    | -135.36(10) |
| N(2)-C(1)-C(2)-C(3)    | -178.26(10) |
| C(6)-C(1)-C(2)-C(3)    | -55.20(14)  |
| C(1)-C(2)-C(3)-C(4)    | 53.73(15)   |
| C(2)-C(3)-C(4)-C(5)    | -55.15(14)  |
| C(7)-N(1)-C(5)-C(4)    | 152.88(11)  |
| C(7)-N(1)-C(5)-C(6)    | -85.07(13)  |
| C(3)-C(4)-C(5)-N(1)    | -178.94(10) |
| C(3)-C(4)-C(5)-C(6)    | 57.83(13)   |
| N(2)-C(1)-C(6)-C(5)    | -178.48(9)  |
| C(2)-C(1)-C(6)-C(5)    | 59.38(13)   |
| N(1)-C(5)-C(6)-C(1)    | 176.54(9)   |
| C(4)-C(5)-C(6)-C(1)    | -60.70(12)  |
| C(5)-N(1)-C(7)-C(12)   | -163.98(11) |
| C(5)-N(1)-C(7)-C(8)    | 16.71(17)   |
| C(12)-C(7)-C(8)-C(9)   | 0.30(17)    |
| N(1)-C(7)-C(8)-C(9)    | 179.63(11)  |
| C(7)-C(8)-C(9)-C(10)   | 0.86(19)    |
| C(13)-O(1)-C(10)-C(9)  | -173.19(11) |
| C(13)-O(1)-C(10)-C(11) | 7.35(18)    |
| C(8)-C(9)-C(10)-O(1)   | 179.37(11)  |
| C(8)-C(9)-C(10)-C(11)  | -1.13(18)   |
| O(1)-C(10)-C(11)-C(12) | 179.68(11)  |
| C(9)-C(10)-C(11)-C(12) | 0.24(18)    |
| C(10)-C(11)-C(12)-C(7) | 0.95(19)    |
| C(8)-C(7)-C(12)-C(11)  | -1.20(18)   |
| N(1)-C(7)-C(12)-C(11)  | 179.44(11)  |
| O(2)-S(1)-C(14)-C(15)  | -1.62(12)   |
| O(3)-S(1)-C(14)-C(15)  | -130.27(10) |
| N(2)-S(1)-C(14)-C(15)  | 116.10(10)  |
| O(2)-S(1)-C(14)-C(19)  | 176.58(9)   |

|                         |             |
|-------------------------|-------------|
| O(3)-S(1)-C(14)-C(19)   | 47.92(11)   |
| N(2)-S(1)-C(14)-C(19)   | -65.70(11)  |
| C(19)-C(14)-C(15)-C(16) | -2.93(18)   |
| S(1)-C(14)-C(15)-C(16)  | 175.23(10)  |
| C(14)-C(15)-C(16)-C(17) | 0.7(2)      |
| C(15)-C(16)-C(17)-C(18) | 2.2(2)      |
| C(15)-C(16)-C(17)-C(20) | -177.03(13) |
| C(16)-C(17)-C(18)-C(19) | -3.0(2)     |
| C(20)-C(17)-C(18)-C(19) | 176.25(13)  |
| C(17)-C(18)-C(19)-C(14) | 0.84(19)    |
| C(15)-C(14)-C(19)-C(18) | 2.17(18)    |
| S(1)-C(14)-C(19)-C(18)  | -176.01(10) |

**Table S14. Hydrogen bonds for ( $\pm$ )-*cis*-7d [ $\text{\AA}$  and  $^\circ$ ].**

| D-H...A            | d(D-H)    | d(H...A)  | d(D...A)   | $\angle$ (DHA) |
|--------------------|-----------|-----------|------------|----------------|
| N(1)-H(1)...O(3)#1 | 0.898(17) | 2.185(18) | 3.0769(13) | 172.2(15)      |
| N(2)-H(2)...O(3)#2 | 0.869(16) | 2.172(16) | 3.0075(14) | 161.2(14)      |

Symmetry transformations used to generate equivalent atoms:

#1  $x-1, y, z$  #2  $-x+2, -y+1, -z+2$

### 7.3. (1*R*,3*S*)-*cis*-7d

Low-temperature diffraction data ( $\omega$ -scans) were collected on a Rigaku MicroMax-007HF diffractometer coupled to a Saturn994+ CCD detector with Cu K $\alpha$  ( $\lambda = 1.54178 \text{ \AA}$ ) for the structure (1*R*,3*S*)-*cis*-7d. The diffraction images were processed and scaled using Rigaku Oxford Diffraction software.<sup>1</sup> The structure was solved with SHELXT and was refined against  $F^2$  on all data by full-matrix least squares with SHELXL.<sup>2</sup> All non-hydrogen atoms were refined anisotropically. Hydrogen atoms were included in the model at geometrically calculated positions and refined using a riding model. The isotropic displacement parameters of all hydrogen atoms were fixed to 1.2 times the U value of the atoms to which they are linked (1.5 times for methyl groups). The only exceptions were H1, H2, H3, and H4, which were semi-freely refined with the aid of a N-H distance restraint of 0.88(2)  $\text{\AA}$ . This value is similar to the N-H distance suggested by the Fourier difference map. The full numbering scheme of compound (1*R*,3*S*)-*cis*-7d can be found in the full details of the X-ray structure determination (CIF), which is included as Supporting Information. CCDC number 1818209 ((1*R*,3*S*)-*cis*-7d) contains the supplementary crystallographic data for this paper. These data can be obtained free of charge from The Cambridge Crystallographic Data Center via [www.ccdc.cam.ac.uk/data\\_request/cif](http://www.ccdc.cam.ac.uk/data_request/cif).

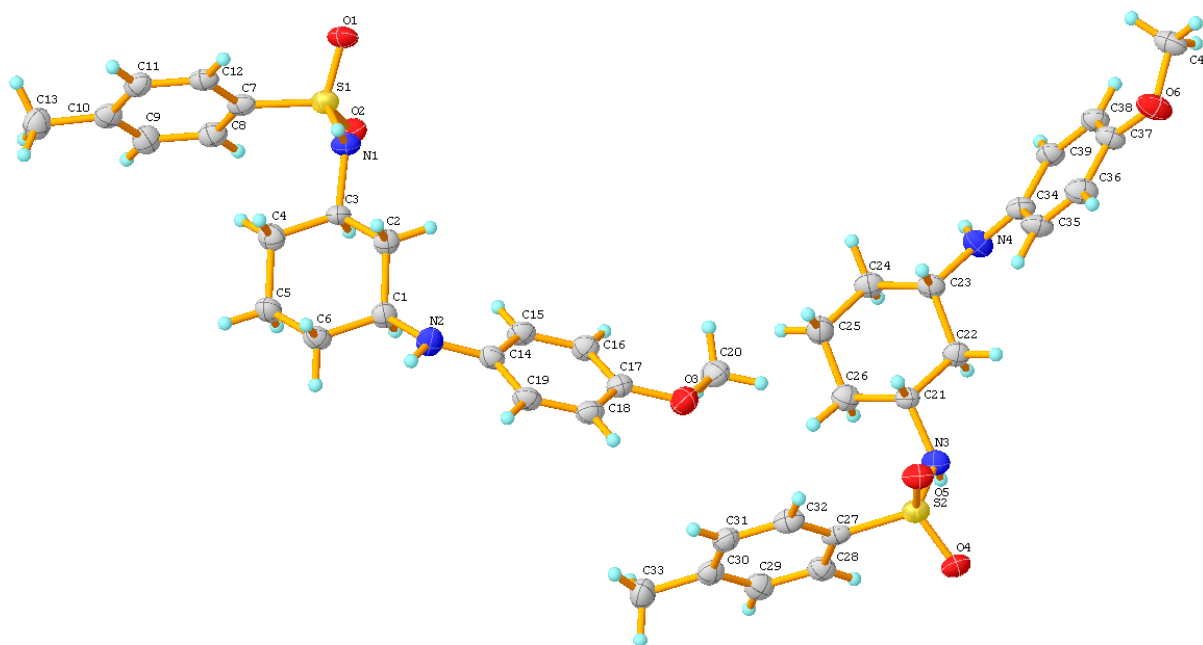

**Figure S3.** The complete numbering scheme of (1*R*,3*S*)-*cis*-7d with 50% thermal ellipsoid probability levels. The hydrogen atoms are shown as circles for clarity.

**Table S15. Crystal data and structure refinement for (1R,3S)-cis-7d.**

|                                   |                                                                 |                 |
|-----------------------------------|-----------------------------------------------------------------|-----------------|
| Identification code               | (1R,3S)-cis-7d                                                  |                 |
| Empirical formula                 | C <sub>20</sub> H <sub>26</sub> N <sub>2</sub> O <sub>3</sub> S |                 |
| Formula weight                    | 374.49                                                          |                 |
| Temperature                       | 93(2) K                                                         |                 |
| Wavelength                        | 1.54184 Å                                                       |                 |
| Crystal system                    | Monoclinic                                                      |                 |
| Space group                       | P2 <sub>1</sub>                                                 |                 |
| Unit cell dimensions              | a = 9.4315(2) Å                                                 | α = 90°.        |
|                                   | b = 9.5202(2) Å                                                 | β = 98.443(3)°. |
|                                   | c = 21.4109(6) Å                                                | γ = 90°.        |
| Volume                            | 1901.64(8) Å <sup>3</sup>                                       |                 |
| Z                                 | 4                                                               |                 |
| Density (calculated)              | 1.308 Mg/m <sup>3</sup>                                         |                 |
| Absorption coefficient            | 1.692 mm <sup>-1</sup>                                          |                 |
| F(000)                            | 800                                                             |                 |
| Crystal size                      | 0.200 x 0.020 x 0.020 mm <sup>3</sup>                           |                 |
| Crystal color and habit           | Colorless Needle                                                |                 |
| Diffractometer                    | Rigaku Saturn 944+ CCD                                          |                 |
| Theta range for data collection   | 2.086 to 67.178°.                                               |                 |
| Index ranges                      | -11 ≤ h ≤ 11, -11 ≤ k ≤ 11, -25 ≤ l ≤ 25                        |                 |
| Reflections collected             | 13138                                                           |                 |
| Independent reflections           | 13138 [R(int) = 0.0989]                                         |                 |
| Observed reflections (I > 2σ(I))  | 10457                                                           |                 |
| Completeness to theta = 67.178°   | 99.4 %                                                          |                 |
| Absorption correction             | Semi-empirical from equivalents                                 |                 |
| Max. and min. transmission        | 1.00000 and 0.92899                                             |                 |
| Solution method                   | SHELXT-2014/5 (Sheldrick, 2014)                                 |                 |
| Refinement method                 | SHELXL-2014/7 (Sheldrick, 2014)                                 |                 |
| Data / restraints / parameters    | 13138 / 5 / 490                                                 |                 |
| Goodness-of-fit on F <sup>2</sup> | 1.138                                                           |                 |
| Final R indices [I > 2σ(I)]       | R1 = 0.0630, wR2 = 0.1621                                       |                 |
| R indices (all data)              | R1 = 0.0902, wR2 = 0.1888                                       |                 |
| Absolute structure parameter      | 0.01(2)                                                         |                 |
| Largest diff. peak and hole       | 0.485 and -0.649 e.Å <sup>-3</sup>                              |                 |

**Table S16. Atomic coordinates ( $\times 10^4$ ) and equivalent isotropic displacement parameters ( $\text{\AA}^2 \times 10^3$ ) for (1*R*,3*S*)-*cis*-7d. U(eq) is defined as one third of the trace of the orthogonalized  $U^{ij}$  tensor.**

|       | x         | y         | z        | U(eq) |
|-------|-----------|-----------|----------|-------|
| S(1)  | 4211(2)   | 8641(2)   | 10127(1) | 31(1) |
| O(1)  | 3151(7)   | 9599(7)   | 9820(3)  | 35(2) |
| O(2)  | 3992(7)   | 7152(7)   | 10019(3) | 35(2) |
| O(3)  | 10196(7)  | 4799(7)   | 7019(3)  | 41(2) |
| N(1)  | 5702(8)   | 9058(9)   | 9894(4)  | 30(2) |
| N(2)  | 10347(8)  | 7800(9)   | 9266(4)  | 35(2) |
| C(1)  | 9398(9)   | 7585(11)  | 9736(4)  | 32(2) |
| C(2)  | 8024(9)   | 8472(10)  | 9588(4)  | 31(2) |
| C(3)  | 7049(10)  | 8250(11)  | 10085(4) | 31(2) |
| C(4)  | 7824(10)  | 8617(11)  | 10735(4) | 35(2) |
| C(5)  | 9189(9)   | 7745(11)  | 10889(4) | 36(2) |
| C(6)  | 10174(9)  | 7942(11)  | 10390(4) | 33(2) |
| C(7)  | 4374(9)   | 8924(10)  | 10944(4) | 30(2) |
| C(8)  | 4343(9)   | 7808(11)  | 11361(4) | 35(2) |
| C(9)  | 4565(10)  | 8060(11)  | 12009(4) | 38(2) |
| C(10) | 4831(10)  | 9417(11)  | 12249(4) | 35(2) |
| C(11) | 4814(10)  | 10523(11) | 11824(4) | 35(2) |
| C(12) | 4603(9)   | 10289(10) | 11178(4) | 32(2) |
| C(13) | 5122(12)  | 9670(12)  | 12948(5) | 45(3) |
| C(14) | 10278(9)  | 6980(10)  | 8728(4)  | 31(2) |
| C(15) | 9094(9)   | 6170(10)  | 8496(4)  | 34(2) |
| C(16) | 9032(10)  | 5407(10)  | 7935(4)  | 34(2) |
| C(17) | 10160(10) | 5455(10)  | 7599(4)  | 33(2) |
| C(18) | 11384(10) | 6211(10)  | 7838(4)  | 34(2) |
| C(19) | 11453(9)  | 6953(11)  | 8393(4)  | 35(2) |
| C(20) | 8946(11)  | 4027(11)  | 6769(5)  | 44(3) |
| S(2)  | 10811(2)  | 947(2)    | 5111(1)  | 31(1) |
| O(4)  | 11656(7)  | -58(7)    | 4832(3)  | 34(2) |
| O(5)  | 10907(7)  | 2405(6)   | 4930(3)  | 34(2) |
| O(6)  | 2987(7)   | 5009(8)   | 2100(3)  | 43(2) |
| N(3)  | 9163(8)   | 466(9)    | 4933(4)  | 30(2) |
| N(4)  | 4120(8)   | 1729(9)   | 4274(4)  | 35(2) |

|       |           |          |         |       |
|-------|-----------|----------|---------|-------|
| C(21) | 7963(9)   | 1317(10) | 5106(4) | 29(2) |
| C(22) | 6652(9)   | 1069(11) | 4612(4) | 32(2) |
| C(23) | 5382(9)   | 1953(11) | 4745(4) | 32(2) |
| C(24) | 5033(10)  | 1644(11) | 5403(4) | 34(2) |
| C(25) | 6349(10)  | 1850(11) | 5901(4) | 39(2) |
| C(26) | 7617(10)  | 986(11)  | 5763(4) | 35(2) |
| C(27) | 11291(9)  | 855(10)  | 5932(4) | 29(2) |
| C(28) | 11245(10) | -459(10) | 6231(4) | 33(2) |
| C(29) | 11583(10) | -538(11) | 6880(5) | 36(2) |
| C(30) | 11978(9)  | 647(10)  | 7245(4) | 34(2) |
| C(31) | 12020(10) | 1936(11) | 6947(4) | 37(2) |
| C(32) | 11681(10) | 2048(10) | 6291(5) | 36(2) |
| C(33) | 12377(11) | 542(13)  | 7953(4) | 45(3) |
| C(34) | 3823(9)   | 2578(10) | 3740(4) | 32(2) |
| C(35) | 4879(9)   | 3344(10) | 3506(5) | 37(2) |
| C(36) | 4564(11)  | 4134(11) | 2964(5) | 40(2) |
| C(37) | 3173(10)  | 4183(10) | 2640(5) | 34(2) |
| C(38) | 2120(9)   | 3425(10) | 2862(4) | 34(2) |
| C(39) | 2434(9)   | 2631(10) | 3407(4) | 32(2) |
| C(40) | 1539(11)  | 5414(11) | 1863(5) | 42(2) |

---

**Table S17. Bond lengths [Å] and angles [°] for (1R,3S)-cis-7d.**

|             |           |              |           |
|-------------|-----------|--------------|-----------|
| S(1)-O(1)   | 1.439(7)  | C(10)-C(13)  | 1.501(14) |
| S(1)-O(2)   | 1.446(7)  | C(11)-C(12)  | 1.385(13) |
| S(1)-N(1)   | 1.609(8)  | C(11)-H(11)  | 0.9500    |
| S(1)-C(7)   | 1.754(10) | C(12)-H(12)  | 0.9500    |
| O(3)-C(17)  | 1.393(11) | C(13)-H(13A) | 0.9800    |
| O(3)-C(20)  | 1.425(12) | C(13)-H(13B) | 0.9800    |
| N(1)-C(3)   | 1.490(12) | C(13)-H(13C) | 0.9800    |
| N(1)-H(1)   | 0.85(4)   | C(14)-C(15)  | 1.387(13) |
| N(2)-C(14)  | 1.385(12) | C(14)-C(19)  | 1.405(12) |
| N(2)-C(1)   | 1.458(11) | C(15)-C(16)  | 1.399(13) |
| N(2)-H(2)   | 0.88(4)   | C(15)-H(15)  | 0.9500    |
| C(1)-C(6)   | 1.519(12) | C(16)-C(17)  | 1.369(13) |
| C(1)-C(2)   | 1.541(13) | C(16)-H(16)  | 0.9500    |
| C(1)-H(1A)  | 1.0000    | C(17)-C(18)  | 1.393(13) |
| C(2)-C(3)   | 1.518(12) | C(18)-C(19)  | 1.376(13) |
| C(2)-H(2A)  | 0.9900    | C(18)-H(18)  | 0.9500    |
| C(2)-H(2B)  | 0.9900    | C(19)-H(19)  | 0.9500    |
| C(3)-C(4)   | 1.515(12) | C(20)-H(20A) | 0.9800    |
| C(3)-H(3)   | 1.0000    | C(20)-H(20B) | 0.9800    |
| C(4)-C(5)   | 1.527(13) | C(20)-H(20C) | 0.9800    |
| C(4)-H(4A)  | 0.9900    | S(2)-O(4)    | 1.431(7)  |
| C(4)-H(4B)  | 0.9900    | S(2)-O(5)    | 1.448(7)  |
| C(5)-C(6)   | 1.528(12) | S(2)-N(3)    | 1.611(8)  |
| C(5)-H(5A)  | 0.9900    | S(2)-C(27)   | 1.752(9)  |
| C(5)-H(5B)  | 0.9900    | O(6)-C(37)   | 1.389(12) |
| C(6)-H(6A)  | 0.9900    | O(6)-C(40)   | 1.438(12) |
| C(6)-H(6B)  | 0.9900    | N(3)-C(21)   | 1.483(12) |
| C(7)-C(8)   | 1.391(13) | N(3)-H(3A)   | 0.88(4)   |
| C(7)-C(12)  | 1.398(13) | N(4)-C(34)   | 1.395(12) |
| C(8)-C(9)   | 1.393(13) | N(4)-C(23)   | 1.459(11) |
| C(8)-H(8)   | 0.9500    | N(4)-H(4)    | 0.89(4)   |
| C(9)-C(10)  | 1.399(14) | C(21)-C(26)  | 1.523(12) |
| C(9)-H(9)   | 0.9500    | C(21)-C(22)  | 1.523(12) |
| C(10)-C(11) | 1.390(14) | C(21)-H(21)  | 1.0000    |
|             |           | C(22)-C(23)  | 1.525(13) |
|             |           | C(22)-H(22A) | 0.9900    |
|             |           | C(22)-H(22B) | 0.9900    |

|              |           |                  |          |
|--------------|-----------|------------------|----------|
| C(23)-C(24)  | 1.521(12) | O(1)-S(1)-O(2)   | 118.4(4) |
| C(23)-H(23)  | 1.0000    | O(1)-S(1)-N(1)   | 106.4(4) |
| C(24)-C(25)  | 1.524(13) | O(2)-S(1)-N(1)   | 107.7(4) |
| C(24)-H(24A) | 0.9900    | O(1)-S(1)-C(7)   | 108.1(4) |
| C(24)-H(24B) | 0.9900    | O(2)-S(1)-C(7)   | 107.4(4) |
| C(25)-C(26)  | 1.516(14) | N(1)-S(1)-C(7)   | 108.6(4) |
| C(25)-H(25A) | 0.9900    | C(17)-O(3)-C(20) | 116.1(7) |
| C(25)-H(25B) | 0.9900    | C(3)-N(1)-S(1)   | 122.4(7) |
| C(26)-H(26A) | 0.9900    | C(3)-N(1)-H(1)   | 108(6)   |
| C(26)-H(26B) | 0.9900    | S(1)-N(1)-H(1)   | 118(6)   |
| C(27)-C(32)  | 1.391(13) | C(14)-N(2)-C(1)  | 122.5(8) |
| C(27)-C(28)  | 1.409(13) | C(14)-N(2)-H(2)  | 120(9)   |
| C(28)-C(29)  | 1.381(13) | C(1)-N(2)-H(2)   | 113(9)   |
| C(28)-H(28)  | 0.9500    | N(2)-C(1)-C(6)   | 110.1(7) |
| C(29)-C(30)  | 1.392(13) | N(2)-C(1)-C(2)   | 111.4(8) |
| C(29)-H(29)  | 0.9500    | C(6)-C(1)-C(2)   | 110.1(8) |
| C(30)-C(31)  | 1.387(14) | N(2)-C(1)-H(1A)  | 108.4    |
| C(30)-C(33)  | 1.509(13) | C(6)-C(1)-H(1A)  | 108.4    |
| C(31)-C(32)  | 1.397(13) | C(2)-C(1)-H(1A)  | 108.4    |
| C(31)-H(31)  | 0.9500    | C(3)-C(2)-C(1)   | 110.9(7) |
| C(32)-H(32)  | 0.9500    | C(3)-C(2)-H(2A)  | 109.5    |
| C(33)-H(33A) | 0.9800    | C(1)-C(2)-H(2A)  | 109.5    |
| C(33)-H(33B) | 0.9800    | C(3)-C(2)-H(2B)  | 109.5    |
| C(33)-H(33C) | 0.9800    | C(1)-C(2)-H(2B)  | 109.5    |
| C(34)-C(35)  | 1.387(13) | H(2A)-C(2)-H(2B) | 108.0    |
| C(34)-C(39)  | 1.397(12) | N(1)-C(3)-C(4)   | 114.2(8) |
| C(35)-C(36)  | 1.379(14) | N(1)-C(3)-C(2)   | 108.4(7) |
| C(35)-H(35)  | 0.9500    | C(4)-C(3)-C(2)   | 110.5(8) |
| C(36)-C(37)  | 1.392(13) | N(1)-C(3)-H(3)   | 107.8    |
| C(36)-H(36)  | 0.9500    | C(4)-C(3)-H(3)   | 107.8    |
| C(37)-C(38)  | 1.368(13) | C(2)-C(3)-H(3)   | 107.8    |
| C(38)-C(39)  | 1.384(13) | C(3)-C(4)-C(5)   | 110.6(8) |
| C(38)-H(38)  | 0.9500    | C(3)-C(4)-H(4A)  | 109.5    |
| C(39)-H(39)  | 0.9500    | C(5)-C(4)-H(4A)  | 109.5    |
| C(40)-H(40A) | 0.9800    | C(3)-C(4)-H(4B)  | 109.5    |
| C(40)-H(40B) | 0.9800    | C(5)-C(4)-H(4B)  | 109.5    |
| C(40)-H(40C) | 0.9800    | H(4A)-C(4)-H(4B) | 108.1    |



|                     |          |                     |          |
|---------------------|----------|---------------------|----------|
| C(4)-C(5)-C(6)      | 111.2(8) | N(2)-C(14)-C(19)    | 119.3(8) |
| C(4)-C(5)-H(5A)     | 109.4    | C(15)-C(14)-C(19)   | 117.5(8) |
| C(6)-C(5)-H(5A)     | 109.4    | C(14)-C(15)-C(16)   | 121.7(8) |
| C(4)-C(5)-H(5B)     | 109.4    | C(14)-C(15)-H(15)   | 119.1    |
| C(6)-C(5)-H(5B)     | 109.4    | C(16)-C(15)-H(15)   | 119.1    |
| H(5A)-C(5)-H(5B)    | 108.0    | C(17)-C(16)-C(15)   | 119.7(9) |
| C(1)-C(6)-C(5)      | 110.9(7) | C(17)-C(16)-H(16)   | 120.1    |
| C(1)-C(6)-H(6A)     | 109.5    | C(15)-C(16)-H(16)   | 120.1    |
| C(5)-C(6)-H(6A)     | 109.5    | C(16)-C(17)-C(18)   | 119.4(9) |
| C(1)-C(6)-H(6B)     | 109.5    | C(16)-C(17)-O(3)    | 125.1(9) |
| C(5)-C(6)-H(6B)     | 109.5    | C(18)-C(17)-O(3)    | 115.6(8) |
| H(6A)-C(6)-H(6B)    | 108.0    | C(19)-C(18)-C(17)   | 121.0(9) |
| C(8)-C(7)-C(12)     | 119.7(9) | C(19)-C(18)-H(18)   | 119.5    |
| C(8)-C(7)-S(1)      | 121.1(7) | C(17)-C(18)-H(18)   | 119.5    |
| C(12)-C(7)-S(1)     | 119.1(7) | C(18)-C(19)-C(14)   | 120.6(8) |
| C(7)-C(8)-C(9)      | 119.6(9) | C(18)-C(19)-H(19)   | 119.7    |
| C(7)-C(8)-H(8)      | 120.2    | C(14)-C(19)-H(19)   | 119.7    |
| C(9)-C(8)-H(8)      | 120.2    | O(3)-C(20)-H(20A)   | 109.5    |
| C(8)-C(9)-C(10)     | 121.1(9) | O(3)-C(20)-H(20B)   | 109.5    |
| C(8)-C(9)-H(9)      | 119.4    | H(20A)-C(20)-H(20B) | 109.5    |
| C(10)-C(9)-H(9)     | 119.4    | O(3)-C(20)-H(20C)   | 109.5    |
| C(11)-C(10)-C(9)    | 118.3(9) | H(20A)-C(20)-H(20C) | 109.5    |
| C(11)-C(10)-C(13)   | 121.0(9) | H(20B)-C(20)-H(20C) | 109.5    |
| C(9)-C(10)-C(13)    | 120.7(9) | O(4)-S(2)-O(5)      | 117.9(4) |
| C(12)-C(11)-C(10)   | 121.2(9) | O(4)-S(2)-N(3)      | 106.8(4) |
| C(12)-C(11)-H(11)   | 119.4    | O(5)-S(2)-N(3)      | 107.8(4) |
| C(10)-C(11)-H(11)   | 119.4    | O(4)-S(2)-C(27)     | 107.9(4) |
| C(11)-C(12)-C(7)    | 120.0(9) | O(5)-S(2)-C(27)     | 107.5(4) |
| C(11)-C(12)-H(12)   | 120.0    | N(3)-S(2)-C(27)     | 108.7(4) |
| C(7)-C(12)-H(12)    | 120.0    | C(37)-O(6)-C(40)    | 116.3(7) |
| C(10)-C(13)-H(13A)  | 109.5    | C(21)-N(3)-S(2)     | 122.1(7) |
| C(10)-C(13)-H(13B)  | 109.5    | C(21)-N(3)-H(3A)    | 110(7)   |
| H(13A)-C(13)-H(13B) | 109.5    | S(2)-N(3)-H(3A)     | 116(7)   |
| C(10)-C(13)-H(13C)  | 109.5    | C(34)-N(4)-C(23)    | 121.8(8) |
| H(13A)-C(13)-H(13C) | 109.5    | C(34)-N(4)-H(4)     | 117(6)   |
| H(13B)-C(13)-H(13C) | 109.5    | C(23)-N(4)-H(4)     | 114(6)   |
| N(2)-C(14)-C(15)    | 123.2(8) | N(3)-C(21)-C(26)    | 113.1(8) |

|                     |          |                     |          |
|---------------------|----------|---------------------|----------|
| N(3)-C(21)-C(22)    | 108.3(7) | C(28)-C(27)-S(2)    | 118.7(7) |
| C(26)-C(21)-C(22)   | 110.3(8) | C(29)-C(28)-C(27)   | 119.2(9) |
| N(3)-C(21)-H(21)    | 108.3    | C(29)-C(28)-H(28)   | 120.4    |
| C(26)-C(21)-H(21)   | 108.3    | C(27)-C(28)-H(28)   | 120.4    |
| C(22)-C(21)-H(21)   | 108.3    | C(28)-C(29)-C(30)   | 121.6(9) |
| C(21)-C(22)-C(23)   | 111.4(8) | C(28)-C(29)-H(29)   | 119.2    |
| C(21)-C(22)-H(22A)  | 109.4    | C(30)-C(29)-H(29)   | 119.2    |
| C(23)-C(22)-H(22A)  | 109.4    | C(31)-C(30)-C(29)   | 118.8(8) |
| C(21)-C(22)-H(22B)  | 109.4    | C(31)-C(30)-C(33)   | 120.1(9) |
| C(23)-C(22)-H(22B)  | 109.4    | C(29)-C(30)-C(33)   | 121.1(9) |
| H(22A)-C(22)-H(22B) | 108.0    | C(30)-C(31)-C(32)   | 120.9(9) |
| N(4)-C(23)-C(24)    | 110.2(7) | C(30)-C(31)-H(31)   | 119.6    |
| N(4)-C(23)-C(22)    | 111.9(8) | C(32)-C(31)-H(31)   | 119.6    |
| C(24)-C(23)-C(22)   | 110.4(8) | C(27)-C(32)-C(31)   | 119.8(9) |
| N(4)-C(23)-H(23)    | 108.1    | C(27)-C(32)-H(32)   | 120.1    |
| C(24)-C(23)-H(23)   | 108.1    | C(31)-C(32)-H(32)   | 120.1    |
| C(22)-C(23)-H(23)   | 108.1    | C(30)-C(33)-H(33A)  | 109.5    |
| C(23)-C(24)-C(25)   | 110.9(8) | C(30)-C(33)-H(33B)  | 109.5    |
| C(23)-C(24)-H(24A)  | 109.5    | H(33A)-C(33)-H(33B) | 109.5    |
| C(25)-C(24)-H(24A)  | 109.5    | C(30)-C(33)-H(33C)  | 109.5    |
| C(23)-C(24)-H(24B)  | 109.5    | H(33A)-C(33)-H(33C) | 109.5    |
| C(25)-C(24)-H(24B)  | 109.5    | H(33B)-C(33)-H(33C) | 109.5    |
| H(24A)-C(24)-H(24B) | 108.0    | C(35)-C(34)-N(4)    | 122.2(8) |
| C(26)-C(25)-C(24)   | 112.3(8) | C(35)-C(34)-C(39)   | 117.7(9) |
| C(26)-C(25)-H(25A)  | 109.2    | N(4)-C(34)-C(39)    | 120.0(8) |
| C(24)-C(25)-H(25A)  | 109.2    | C(36)-C(35)-C(34)   | 120.9(9) |
| C(26)-C(25)-H(25B)  | 109.2    | C(36)-C(35)-H(35)   | 119.5    |
| C(24)-C(25)-H(25B)  | 109.2    | C(34)-C(35)-H(35)   | 119.5    |
| H(25A)-C(25)-H(25B) | 107.9    | C(35)-C(36)-C(37)   | 120.6(9) |
| C(25)-C(26)-C(21)   | 110.5(8) | C(35)-C(36)-H(36)   | 119.7    |
| C(25)-C(26)-H(26A)  | 109.6    | C(37)-C(36)-H(36)   | 119.7    |
| C(21)-C(26)-H(26A)  | 109.6    | C(38)-C(37)-O(6)    | 125.4(8) |
| C(25)-C(26)-H(26B)  | 109.6    | C(38)-C(37)-C(36)   | 119.2(9) |
| C(21)-C(26)-H(26B)  | 109.6    | O(6)-C(37)-C(36)    | 115.3(8) |
| H(26A)-C(26)-H(26B) | 108.1    | C(37)-C(38)-C(39)   | 120.3(8) |
| C(32)-C(27)-C(28)   | 119.7(8) | C(37)-C(38)-H(38)   | 119.9    |
| C(32)-C(27)-S(2)    | 121.5(7) | C(39)-C(38)-H(38)   | 119.9    |

|                   |          |                     |       |
|-------------------|----------|---------------------|-------|
| C(38)-C(39)-C(34) | 121.2(8) | H(40A)-C(40)-H(40B) | 109.5 |
| C(38)-C(39)-H(39) | 119.4    | O(6)-C(40)-H(40C)   | 109.5 |
| C(34)-C(39)-H(39) | 119.4    | H(40A)-C(40)-H(40C) | 109.5 |
| O(6)-C(40)-H(40A) | 109.5    | H(40B)-C(40)-H(40C) | 109.5 |
| O(6)-C(40)-H(40B) | 109.5    |                     |       |

**Table S18.** Anisotropic displacement parameters ( $\text{\AA}^2 \times 10^3$ ) for (1*R*,3*S*)-*cis*-7d. The anisotropic displacement factor exponent takes the form:  $-2\pi^2 [ h^2 a^{*2} U^{11} + \dots + 2 h k a^* b^* U^{12} ]$

|       | U <sup>11</sup> | U <sup>22</sup> | U <sup>33</sup> | U <sup>23</sup> | U <sup>13</sup> | U <sup>12</sup> |
|-------|-----------------|-----------------|-----------------|-----------------|-----------------|-----------------|
| S(1)  | 21(1)           | 32(1)           | 39(1)           | -2(1)           | 4(1)            | -1(1)           |
| O(1)  | 21(3)           | 37(4)           | 46(4)           | 0(3)            | 1(3)            | 5(3)            |
| O(2)  | 27(3)           | 31(4)           | 47(4)           | -7(3)           | 7(3)            | -5(3)           |
| O(3)  | 36(4)           | 46(4)           | 41(4)           | -7(3)           | 6(3)            | 2(3)            |
| N(1)  | 23(4)           | 25(5)           | 42(5)           | 3(3)            | 7(3)            | -1(3)           |
| N(2)  | 24(4)           | 45(5)           | 37(4)           | -6(4)           | 7(3)            | -8(4)           |
| C(1)  | 23(5)           | 43(6)           | 32(5)           | -1(4)           | 6(4)            | -3(4)           |
| C(2)  | 25(4)           | 36(5)           | 33(5)           | 0(4)            | 7(4)            | -4(4)           |
| C(3)  | 26(5)           | 36(6)           | 31(5)           | -1(4)           | 2(4)            | 12(4)           |
| C(4)  | 30(5)           | 37(5)           | 37(5)           | -2(4)           | 1(4)            | -4(5)           |
| C(5)  | 25(5)           | 49(6)           | 34(5)           | 1(4)            | 3(4)            | 3(5)            |
| C(6)  | 22(5)           | 42(6)           | 35(5)           | 6(4)            | 4(4)            | 1(4)            |
| C(7)  | 17(4)           | 32(5)           | 41(5)           | -3(4)           | 3(4)            | 0(4)            |
| C(8)  | 27(5)           | 36(5)           | 44(5)           | -2(4)           | 7(4)            | -1(4)           |
| C(9)  | 33(5)           | 46(6)           | 37(5)           | 2(5)            | 10(4)           | -4(5)           |
| C(10) | 21(4)           | 42(6)           | 42(5)           | -3(4)           | 8(4)            | -1(4)           |
| C(11) | 24(5)           | 38(6)           | 41(5)           | -9(4)           | 5(4)            | 0(4)            |
| C(12) | 20(4)           | 34(5)           | 44(5)           | -1(4)           | 5(4)            | 2(4)            |
| C(13) | 40(6)           | 56(7)           | 40(6)           | -6(5)           | 11(5)           | -4(5)           |
| C(14) | 22(4)           | 37(5)           | 33(5)           | 2(4)            | 2(4)            | 0(4)            |
| C(15) | 22(4)           | 40(6)           | 41(5)           | -1(4)           | 9(4)            | -1(4)           |
| C(16) | 25(5)           | 37(5)           | 39(5)           | -4(4)           | 4(4)            | -3(4)           |
| C(17) | 30(5)           | 35(5)           | 35(5)           | -2(4)           | 5(4)            | 5(4)            |
| C(18) | 28(5)           | 38(6)           | 38(5)           | 5(4)            | 9(4)            | 5(4)            |
| C(19) | 21(4)           | 43(6)           | 40(5)           | 3(4)            | 4(4)            | 1(4)            |
| C(20) | 40(6)           | 43(6)           | 46(6)           | -9(5)           | 2(5)            | 6(5)            |

|       |       |       |       |       |       |       |
|-------|-------|-------|-------|-------|-------|-------|
| S(2)  | 24(1) | 30(1) | 38(1) | 2(1)  | 7(1)  | 1(1)  |
| O(4)  | 27(4) | 35(4) | 42(4) | 0(3)  | 11(3) | 5(3)  |
| O(5)  | 29(4) | 28(4) | 45(4) | 8(3)  | 10(3) | -1(3) |
| O(6)  | 24(3) | 52(4) | 52(4) | 19(3) | 2(3)  | -2(3) |
| N(3)  | 24(4) | 27(5) | 39(4) | 0(3)  | 4(3)  | -5(4) |
| N(4)  | 22(4) | 44(5) | 40(4) | 6(4)  | 3(3)  | -7(4) |
| C(21) | 27(5) | 29(5) | 31(5) | -1(4) | 2(4)  | 5(4)  |
| C(22) | 22(4) | 37(5) | 36(5) | -1(4) | 6(4)  | -3(4) |
| C(23) | 20(4) | 36(5) | 38(5) | 0(4)  | 3(4)  | -2(4) |
| C(24) | 24(5) | 37(6) | 43(5) | 1(4)  | 8(4)  | -2(4) |
| C(25) | 32(5) | 49(6) | 37(5) | -3(5) | 5(4)  | 0(5)  |
| C(26) | 31(5) | 37(5) | 37(5) | 3(4)  | 7(4)  | -1(5) |
| C(27) | 17(4) | 26(4) | 45(5) | -1(4) | 10(4) | 1(4)  |
| C(28) | 23(5) | 38(5) | 38(5) | 0(4)  | 5(4)  | 0(4)  |
| C(29) | 27(5) | 43(6) | 41(5) | 4(5)  | 10(4) | -3(5) |
| C(30) | 26(5) | 40(6) | 37(5) | -2(4) | 9(4)  | 1(4)  |
| C(31) | 29(5) | 43(6) | 39(5) | -9(5) | 6(4)  | 4(4)  |
| C(32) | 28(5) | 31(5) | 50(6) | -2(4) | 8(4)  | 1(4)  |
| C(33) | 40(6) | 62(8) | 34(5) | -6(5) | 9(4)  | 3(5)  |
| C(34) | 24(5) | 32(5) | 41(5) | 1(4)  | 6(4)  | 2(4)  |
| C(35) | 20(4) | 43(6) | 48(6) | 6(4)  | 3(4)  | 4(4)  |
| C(36) | 28(5) | 41(6) | 51(6) | 9(5)  | 9(4)  | 0(4)  |
| C(37) | 22(5) | 37(5) | 41(5) | 5(4)  | 0(4)  | 0(4)  |
| C(38) | 22(5) | 40(6) | 41(5) | -1(4) | 3(4)  | 1(4)  |
| C(39) | 20(4) | 38(5) | 40(5) | -1(4) | 6(4)  | 0(4)  |
| C(40) | 31(5) | 41(6) | 51(6) | 4(5)  | -7(5) | 3(5)  |

---

**Table S19. Hydrogen coordinates (  $\times 10^4$ ) and isotropic displacement parameters ( $\text{\AA}^2 \times 10^3$ ) for (1*R*,3*S*)-*cis*-7d.**

|        | x         | y         | z        | U(eq)  |
|--------|-----------|-----------|----------|--------|
| H(1)   | 5920(90)  | 9930(40)  | 9880(40) | 10(20) |
| H(2)   | 11150(90) | 8220(130) | 9420(60) | 80(40) |
| H(1A)  | 9120      | 6571      | 9732     | 39     |
| H(2A)  | 8283      | 9478      | 9575     | 37     |
| H(2B)  | 7508      | 8207      | 9169     | 37     |
| H(3)   | 6795      | 7230      | 10085    | 37     |
| H(4A)  | 7186      | 8437      | 11054    | 42     |
| H(4B)  | 8071      | 9629      | 10750    | 42     |
| H(5A)  | 8933      | 6740      | 10912    | 44     |
| H(5B)  | 9702      | 8029      | 11307    | 44     |
| H(6A)  | 10508     | 8929      | 10395    | 40     |
| H(6B)  | 11026     | 7330      | 10490    | 40     |
| H(8)   | 4172      | 6880      | 11205    | 42     |
| H(9)   | 4535      | 7298      | 12293    | 46     |
| H(11)  | 4950      | 11455     | 11978    | 41     |
| H(12)  | 4613      | 11055     | 10895    | 39     |
| H(13A) | 6132      | 9922      | 13070    | 67     |
| H(13B) | 4910      | 8814      | 13171    | 67     |
| H(13C) | 4514      | 10438     | 13058    | 67     |
| H(15)  | 8304      | 6134      | 8725     | 41     |
| H(16)  | 8211      | 4857      | 7787     | 41     |
| H(18)  | 12183     | 6214      | 7615     | 41     |
| H(19)  | 12302     | 7453      | 8551     | 41     |
| H(20A) | 9040      | 3696      | 6343     | 65     |
| H(20B) | 8102      | 4634      | 6750     | 65     |
| H(20C) | 8838      | 3219      | 7042     | 65     |
| H(3A)  | 8990(100) | -430(50)  | 4980(40) | 30(30) |
| H(4)   | 3380(70)  | 1370(100) | 4430(40) | 30(30) |
| H(21)  | 8232      | 2332      | 5093     | 35     |
| H(22A) | 6387      | 62        | 4611     | 38     |
| H(22B) | 6887      | 1308      | 4189     | 38     |

|        |       |       |      |    |
|--------|-------|-------|------|----|
| H(23)  | 5660  | 2965  | 4730 | 38 |
| H(24A) | 4690  | 664   | 5420 | 41 |
| H(24B) | 4256  | 2276  | 5495 | 41 |
| H(25A) | 6616  | 2856  | 5918 | 47 |
| H(25B) | 6108  | 1581  | 6319 | 47 |
| H(26A) | 7393  | -26   | 5792 | 42 |
| H(26B) | 8461  | 1196  | 6082 | 42 |
| H(28)  | 10985 | -1281 | 5990 | 40 |
| H(29)  | 11546 | -1423 | 7082 | 43 |
| H(31)  | 12282 | 2753  | 7191 | 44 |
| H(32)  | 11717 | 2936  | 6092 | 43 |
| H(33A) | 13285 | 33    | 8053 | 68 |
| H(33B) | 11623 | 37    | 8130 | 68 |
| H(33C) | 12482 | 1488  | 8134 | 68 |
| H(35)  | 5834  | 3324  | 3722 | 45 |
| H(36)  | 5302  | 4650  | 2810 | 47 |
| H(38)  | 1170  | 3443  | 2642 | 41 |
| H(39)  | 1691  | 2114  | 3557 | 39 |
| H(40A) | 1545  | 6120  | 1530 | 63 |
| H(40B) | 1086  | 5810  | 2207 | 63 |
| H(40C) | 998   | 4588  | 1690 | 63 |

---

**Table S20. Torsion angles [°] for (1*R*,3*S*)-cis-7d.**

|                         |           |
|-------------------------|-----------|
| O(1)-S(1)-N(1)-C(3)     | -176.7(7) |
| O(2)-S(1)-N(1)-C(3)     | -48.9(8)  |
| C(7)-S(1)-N(1)-C(3)     | 67.2(8)   |
| C(14)-N(2)-C(1)-C(6)    | 147.1(9)  |
| C(14)-N(2)-C(1)-C(2)    | -90.5(11) |
| N(2)-C(1)-C(2)-C(3)     | -179.5(8) |
| C(6)-C(1)-C(2)-C(3)     | -57.1(10) |
| S(1)-N(1)-C(3)-C(4)     | -80.9(10) |
| S(1)-N(1)-C(3)-C(2)     | 155.4(7)  |
| C(1)-C(2)-C(3)-N(1)     | -176.3(8) |
| C(1)-C(2)-C(3)-C(4)     | 57.9(11)  |
| N(1)-C(3)-C(4)-C(5)     | -179.8(8) |
| C(2)-C(3)-C(4)-C(5)     | -57.3(11) |
| C(3)-C(4)-C(5)-C(6)     | 56.6(11)  |
| N(2)-C(1)-C(6)-C(5)     | 179.1(8)  |
| C(2)-C(1)-C(6)-C(5)     | 56.0(11)  |
| C(4)-C(5)-C(6)-C(1)     | -56.3(11) |
| O(1)-S(1)-C(7)-C(8)     | 131.4(7)  |
| O(2)-S(1)-C(7)-C(8)     | 2.6(8)    |
| N(1)-S(1)-C(7)-C(8)     | -113.6(8) |
| O(1)-S(1)-C(7)-C(12)    | -51.5(8)  |
| O(2)-S(1)-C(7)-C(12)    | 179.7(7)  |
| N(1)-S(1)-C(7)-C(12)    | 63.5(8)   |
| C(12)-C(7)-C(8)-C(9)    | -1.1(13)  |
| S(1)-C(7)-C(8)-C(9)     | 176.0(7)  |
| C(7)-C(8)-C(9)-C(10)    | -0.6(14)  |
| C(8)-C(9)-C(10)-C(11)   | 2.5(14)   |
| C(8)-C(9)-C(10)-C(13)   | -177.7(9) |
| C(9)-C(10)-C(11)-C(12)  | -2.8(14)  |
| C(13)-C(10)-C(11)-C(12) | 177.4(9)  |
| C(10)-C(11)-C(12)-C(7)  | 1.2(14)   |
| C(8)-C(7)-C(12)-C(11)   | 0.7(13)   |
| S(1)-C(7)-C(12)-C(11)   | -176.4(7) |
| C(1)-N(2)-C(14)-C(15)   | 18.6(14)  |
| C(1)-N(2)-C(14)-C(19)   | -161.5(9) |

|                         |           |
|-------------------------|-----------|
| N(2)-C(14)-C(15)-C(16)  | 176.9(9)  |
| C(19)-C(14)-C(15)-C(16) | -3.0(14)  |
| C(14)-C(15)-C(16)-C(17) | -0.3(14)  |
| C(15)-C(16)-C(17)-C(18) | 3.1(14)   |
| C(15)-C(16)-C(17)-O(3)  | -176.6(9) |
| C(20)-O(3)-C(17)-C(16)  | 0.0(13)   |
| C(20)-O(3)-C(17)-C(18)  | -179.8(8) |
| C(16)-C(17)-C(18)-C(19) | -2.6(14)  |
| O(3)-C(17)-C(18)-C(19)  | 177.2(9)  |
| C(17)-C(18)-C(19)-C(14) | -0.8(14)  |
| N(2)-C(14)-C(19)-C(18)  | -176.3(9) |
| C(15)-C(14)-C(19)-C(18) | 3.5(14)   |
| O(4)-S(2)-N(3)-C(21)    | -175.7(7) |
| O(5)-S(2)-N(3)-C(21)    | -48.1(8)  |
| C(27)-S(2)-N(3)-C(21)   | 68.1(8)   |
| S(2)-N(3)-C(21)-C(26)   | -87.2(10) |
| S(2)-N(3)-C(21)-C(22)   | 150.2(7)  |
| N(3)-C(21)-C(22)-C(23)  | -177.9(8) |
| C(26)-C(21)-C(22)-C(23) | 57.8(11)  |
| C(34)-N(4)-C(23)-C(24)  | 143.9(9)  |
| C(34)-N(4)-C(23)-C(22)  | -92.8(11) |
| C(21)-C(22)-C(23)-N(4)  | 179.8(8)  |
| C(21)-C(22)-C(23)-C(24) | -57.0(10) |
| N(4)-C(23)-C(24)-C(25)  | 179.1(8)  |
| C(22)-C(23)-C(24)-C(25) | 54.9(11)  |
| C(23)-C(24)-C(25)-C(26) | -55.1(11) |
| C(24)-C(25)-C(26)-C(21) | 55.7(11)  |
| N(3)-C(21)-C(26)-C(25)  | -177.9(8) |
| C(22)-C(21)-C(26)-C(25) | -56.5(11) |
| O(4)-S(2)-C(27)-C(32)   | 127.9(7)  |
| O(5)-S(2)-C(27)-C(32)   | -0.3(8)   |
| N(3)-S(2)-C(27)-C(32)   | -116.7(7) |
| O(4)-S(2)-C(27)-C(28)   | -53.6(8)  |
| O(5)-S(2)-C(27)-C(28)   | 178.2(7)  |
| N(3)-S(2)-C(27)-C(28)   | 61.9(8)   |
| C(32)-C(27)-C(28)-C(29) | 0.4(13)   |
| S(2)-C(27)-C(28)-C(29)  | -178.2(7) |



|                         |           |
|-------------------------|-----------|
| C(27)-C(28)-C(29)-C(30) | -0.5(14)  |
| C(28)-C(29)-C(30)-C(31) | 0.5(14)   |
| C(28)-C(29)-C(30)-C(33) | -178.6(9) |
| C(29)-C(30)-C(31)-C(32) | -0.4(14)  |
| C(33)-C(30)-C(31)-C(32) | 178.7(8)  |
| C(28)-C(27)-C(32)-C(31) | -0.3(13)  |
| S(2)-C(27)-C(32)-C(31)  | 178.3(7)  |
| C(30)-C(31)-C(32)-C(27) | 0.3(13)   |
| C(23)-N(4)-C(34)-C(35)  | 22.3(14)  |
| C(23)-N(4)-C(34)-C(39)  | -160.3(9) |
| N(4)-C(34)-C(35)-C(36)  | 177.6(9)  |
| C(39)-C(34)-C(35)-C(36) | 0.2(15)   |
| C(34)-C(35)-C(36)-C(37) | 0.2(16)   |
| C(40)-O(6)-C(37)-C(38)  | 18.6(14)  |
| C(40)-O(6)-C(37)-C(36)  | -162.4(9) |
| C(35)-C(36)-C(37)-C(38) | -0.7(15)  |
| C(35)-C(36)-C(37)-O(6)  | -179.8(9) |
| O(6)-C(37)-C(38)-C(39)  | 179.7(9)  |
| C(36)-C(37)-C(38)-C(39) | 0.7(15)   |
| C(37)-C(38)-C(39)-C(34) | -0.3(15)  |
| C(35)-C(34)-C(39)-C(38) | -0.2(14)  |
| N(4)-C(34)-C(39)-C(38)  | -177.7(9) |

**Table S21. Hydrogen bonds for (1*R*,3*S*)-cis-7d [Å and °].**

| D-H...A             | d(D-H)  | d(H...A) | d(D...A)  | <(DHA)  |
|---------------------|---------|----------|-----------|---------|
| N(1)-H(1)...O(2)#1  | 0.85(4) | 2.13(4)  | 2.962(11) | 165(8)  |
| N(2)-H(2)...O(1)#2  | 0.88(4) | 2.35(4)  | 3.227(10) | 173(13) |
| N(3)-H(3A)...O(5)#3 | 0.88(4) | 2.07(5)  | 2.931(10) | 167(9)  |
| N(4)-H(4)...O(4)#4  | 0.89(4) | 2.37(4)  | 3.245(10) | 168(9)  |

Symmetry transformations used to generate equivalent atoms:

#1 -x+1,y+1/2,-z+2 #2 x+1,y,z #3 -x+2,y-1/2,-z+1

#4 x-1,y,z

## 8. Computational Data

### 8.1. General Computational Information

All calculations were carried out on the supercomputer clusters provided by the Yale University Faculty of Arts and Science High Performance Computing Center.<sup>3</sup> These calculations were performed using Gaussian 09 revision C.01,<sup>4</sup> and the all input and output files were created and visualized using GaussView 5.0. All calculations were carried out at 25 °C and 1 atm of pressure in the gas phase.<sup>5,6</sup>

In order to determine the Gibbs free energy difference ( $\Delta G^\circ$ ) between the four conformers of the imine intermediates, the optimized geometries of the *Z*- and *E*-imine and axial and equatorial directing group conformations were found. First, potential energy scans were performed on the axial and equatorial phenylacetamide substituent, along with the aniline using B3LYP/6-31+G(d,p) in order to determine the preferred dihedral angles of the compounds. The relevant dihedral angles were defined as constrained coordinates and a scan from 0° to 360° at 10° increments was performed for each, with the structure of each increment being subjected to a geometry optimization and frequency calculation. On the scans shown below, the positive direction represents clockwise rotation of the functional group and the negative direction represents counterclockwise rotation. Red numbers on the y-axis of the dihedral scans below represent the energy maximum. Red numbers on the x-axis represent the lowest energy dihedral angle. Using these minimized dihedral angles, the compounds were then submitted for unconstrained geometry optimization and vibrational frequency calculation using B3LYP/6-311+G(d,p). As a control, some dihedral angles of each compound were varied outside their absolute minimum and submitted for the same optimization and frequency calculation to ensure the previously calculated structures were the true energy minimum. Finally, single-point energies for the optimized geometries were calculated using M06-2X/6-311++G(2d,3p), B3LYP/6-311++G(2d,3p), or MP2/6-311+G(2d,3p).<sup>7,8</sup> The dipole moments from these single-point energy calculation were utilized in the paper.

The energies derived from these calculations are expressed as total energy ( $E^\circ$ ) in Hartree atomic units (a.u.). Each calculation performing a frequency calculation also contained a thermal correction of the total energy value to a Gibbs free energy value ( $G^\circ$ ).<sup>9</sup> These values can be used to calculate the change in Gibbs free energy ( $\Delta G^\circ$ ) between the chair conformers in kilocalories per mole using the following equation:

$$\Delta G^\circ = (G^\circ_{axial} - G^\circ_{equatorial}) \left( \frac{627.51 \text{ kcal}}{\text{mol}\cdot\text{a.u.}} \right) \quad (1)$$

Using 0.001987 kcal·mol<sup>-1</sup>·K<sup>-1</sup> as the gas constant (R) and 298 K as temperature (T), the equilibrium constant can then be derived from this value by:

$$\Delta G^\circ = -RT \ln K \quad (2)$$

The equilibrium ratio of the two conformers can be obtained by the following equation [major:minor]:

$$\left[ \left( 100 - \frac{100}{1+K} \right) : \left( \frac{100}{1+K} \right) \right] \quad (3)$$

The calculation of equilibrium ratios becomes more complicated when there are greater than two competing conformations, such as when a compound such as **7a** can exist with an equatorial or axial amido group and with an *E* or *Z* imine, resulting in four accessible conformations. In this case, the lowest energy conformer (**A**) is determined, and each of the remaining three conformations is presumed to be in equilibrium with conformer **A** (**Figure SI-15**). The individual  $\Delta G^\circ$  and K are determined between **A** and each conformer using equations 1 and 2.<sup>9,10</sup>

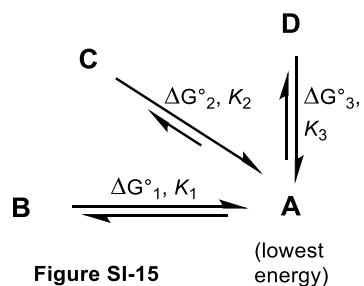

The individual  $K$  values can be summed to yield  $K_{TOT}$  using equation 4. As a note,  $K_A$  is the equilibrium constant of A to itself, meaning  $K_A = 1$ .<sup>12,13</sup>

$$K_{TOT} = K_1 + K_2 + K_3 + K_A = \frac{[B]}{[A]} + \frac{[C]}{[A]} + \frac{[D]}{[A]} + \frac{[A]}{[A]} = \frac{[A] + [B] + [C] + [D]}{[A]} \quad (4)$$

Calculation of the equilibrium percentages of each species can be performed using equation 5.

$$\%_B = \frac{K_1}{K_{TOT}} \cdot 100 = \frac{[B]}{[A]} \cdot \frac{[A]}{[A] + [B] + [C] + [D]} = \frac{[B]}{[A] + [B] + [C] + [D]} \quad (5)$$

It is important to note that this method is an estimation of the equilibrium percentages, as it does not take into account equilibration between other conformers not including A, such as B to C. Furthermore, this does not take into account potential stereoselectivity in catalyst controlled imine formation. However, this method can effectively determine whether particular conformers alone are vastly more stable or unstable than others.

## 8.2. Potential Energy Scans for Structure Optimization Calculations

Prior to submission of geometry optimization and frequency calculations on substrates, a number of potential energy scans were performed on appended groups to determine the preferred dihedral angles in the complexes and prevent any geometry optimization calculations to find a local, as opposed to the desired absolute, energy minimum. DFT calculations were performed at the B3LYP/6-31+G (d,p) level of theory in the gas phase.

***N*-Cyclohexyl-4-methoxyaniline (10-*eq*, Ring Connection, Equatorial)**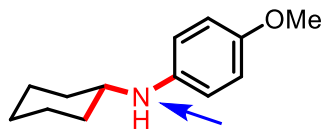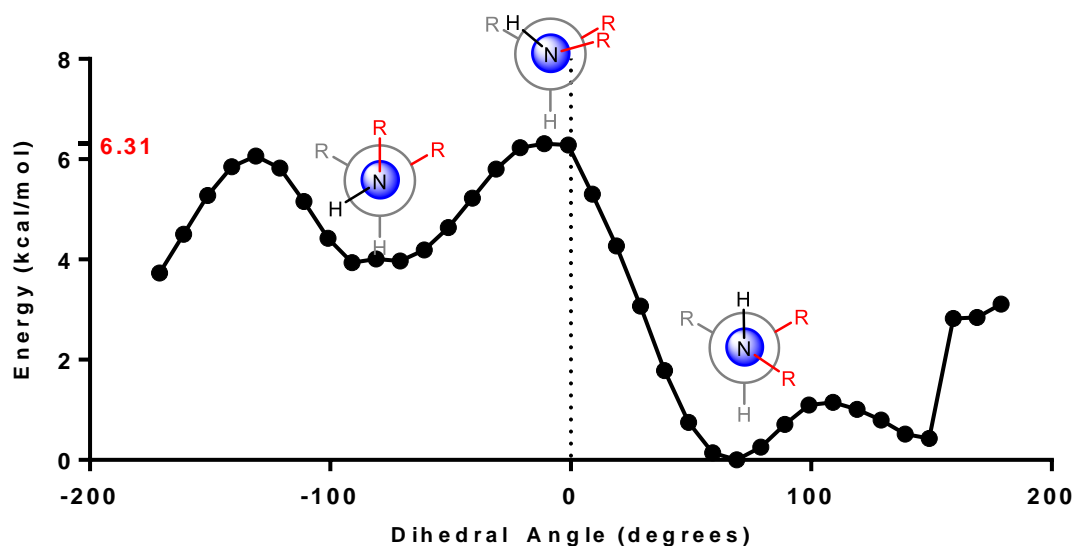

As a note, the nitrogen center inverts over the course of this scan. The dihedral is between the red groups.

| C-N Dihedral (°) | Total Energy (kcal/mol) | C-N Dihedral (°) | Total Energy (kcal/mol) | C-N Dihedral (°) | Total Energy (kcal/mol) |
|------------------|-------------------------|------------------|-------------------------|------------------|-------------------------|
| -171             | 3.728418                | -41              | 5.222918                | 89               | 0.707388                |
| -161             | 4.505208                | -31              | 5.802968                | 99               | 1.099118                |
| -151             | 5.276978                | -21              | 6.229238                | 109              | 1.150468                |
| -141             | 5.849788                | -11              | 6.313128                | 119              | 1.010658                |
| -131             | 6.064288                | -1               | 6.28334                 | 129              | 0.793538                |
| -121             | 5.822448                | 9                | 5.306038                | 139              | 0.516488                |
| -111             | 5.159988                | 19               | 4.267258                | 149              | 0.433095                |
| -101             | 4.424838                | 29               | 3.066668                | 159              | 2.822758                |
| -91              | 3.938538                | 39               | 1.785238                | 169              | 2.840598                |
| -81              | 4.011488                | 49               | 0.749098                | 179              | 3.112358                |
| -71              | 3.967708                | 59               | 0.146147                | 89               | 0.707388                |
| -61              | 4.189108                | 69               | 0                       |                  |                         |
| -51              | 4.634308                | 79               | 0.257544                |                  |                         |

***N*-Cyclohexyl-4-methoxyaniline (10-*ax*, Ring Connection, Axial)**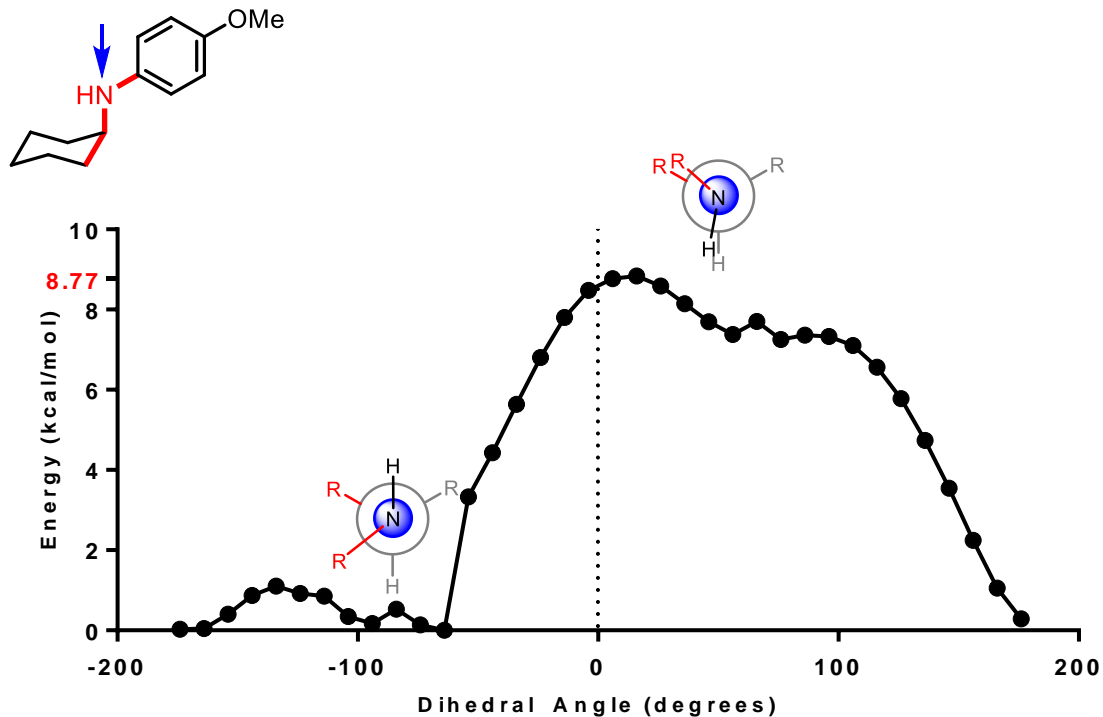

As a note, the nitrogen center inverts over the course of this scan. The dihedral is between the red groups.

| C-N Dihedral (°) | Total Energy (kcal/mol) | C-N Dihedral (°) | Total Energy (kcal/mol) | C-N Dihedral (°) | Total Energy (kcal/mol) |
|------------------|-------------------------|------------------|-------------------------|------------------|-------------------------|
| -174             | 0.026684                | -44              | 4.42992                 | 86               | 7.35971                 |
| -164             | 0.04473                 | -34              | 5.6386                  | 96               | 7.32869                 |
| -154             | 0.403874                | -24              | 6.80499                 | 106              | 7.10678                 |
| -144             | 0.86812                 | -14              | 7.80238                 | 116              | 6.55886                 |
| -134             | 1.10599                 | -4               | 8.47822                 | 126              | 5.78316                 |
| -124             | 0.92129                 | 6                | 8.77203                 | 136              | 4.73862                 |
| -114             | 0.85118                 | 16               | 8.83345                 | 146              | 3.54604                 |
| -104             | 0.34711                 | 26               | 8.59144                 | 156              | 2.24387                 |
| -94              | 0.173662                | 36               | 8.14842                 | 166              | 1.05213                 |
| -84              | 0.529116                | 46               | 7.6986                  | 176              | 0.283866                |
| -74              | 0.134637                | 56               | 7.37744                 | 86               | 7.35971                 |
| -64              | 0                       | 66               | 7.70592                 |                  |                         |
| -54              | 3.32692                 | 76               | 7.25574                 |                  |                         |

***N*-Cyclohexyl-4-methoxyaniline (10-*eq*, Pendant Group, Equatorial)**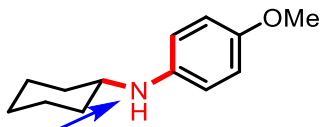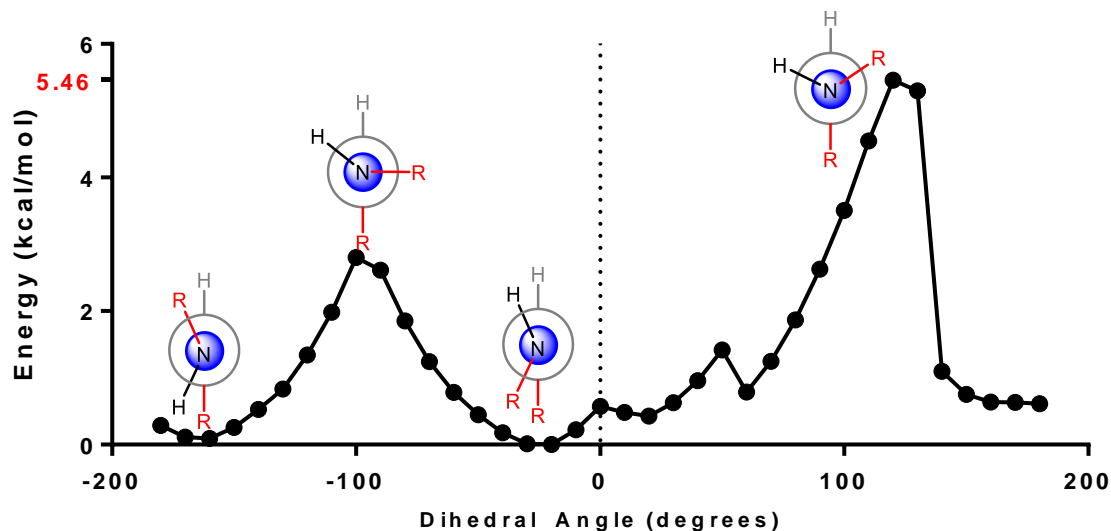

As a note, the nitrogen center inverts over the course of this scan. The dihedral is between the red groups.

| C-N Dihedral (°) | Total Energy (kcal/mol) | C-N Dihedral (°) | Total Energy (kcal/mol) | C-N Dihedral (°) | Total Energy (kcal/mol) |
|------------------|-------------------------|------------------|-------------------------|------------------|-------------------------|
| -171             | 3.728418                | -41              | 5.222918                | 89               | 0.707388                |
| -161             | 4.505208                | -31              | 5.802968                | 99               | 1.099118                |
| -151             | 5.276978                | -21              | 6.229238                | 109              | 1.150468                |
| -141             | 5.849788                | -11              | 6.313128                | 119              | 1.010658                |
| -131             | 6.064288                | -1               | 6.28334                 | 129              | 0.793538                |
| -121             | 5.822448                | 9                | 5.306038                | 139              | 0.516488                |
| -111             | 5.159988                | 19               | 4.267258                | 149              | 0.433095                |
| -101             | 4.424838                | 29               | 3.066668                | 159              | 2.822758                |
| -91              | 3.938538                | 39               | 1.785238                | 169              | 2.840598                |
| -81              | 4.011488                | 49               | 0.749098                | 179              | 3.112358                |
| -71              | 3.967708                | 59               | 0.146147                | 89               | 0.707388                |
| -61              | 4.189108                | 69               | 0                       |                  |                         |
| -51              | 4.634308                | 79               | 0.257544                |                  |                         |

3-Phenylacetamidocyclohexanone (4a-*eq*, Ring Connection, Equatorial)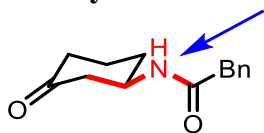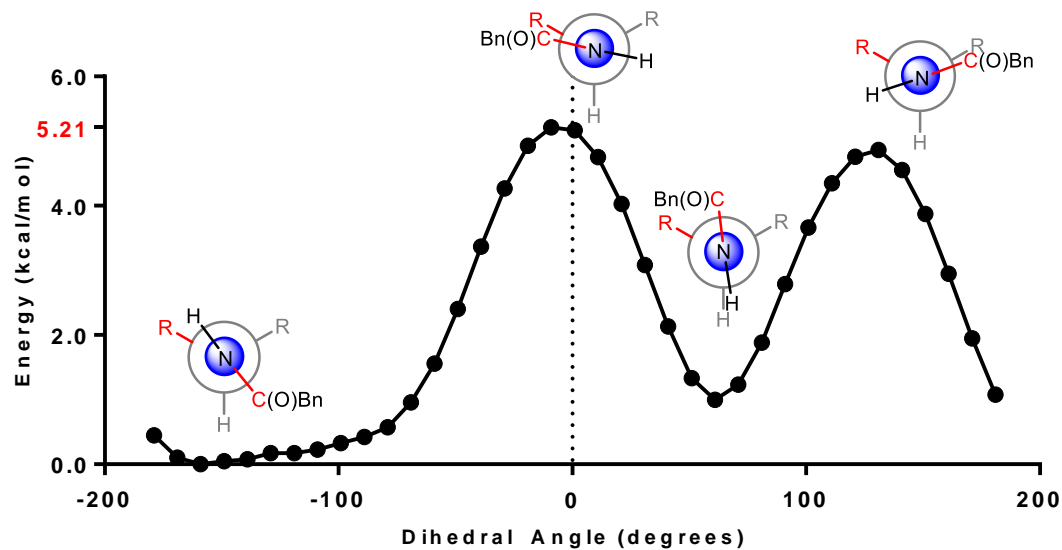

| C-N Dihedral (°) | Total Energy (kcal/mol) | C-N Dihedral (°) | Total Energy (kcal/mol) | C-N Dihedral (°) | Total Energy (kcal/mol) |
|------------------|-------------------------|------------------|-------------------------|------------------|-------------------------|
| 181              | 1.07759                 | 51               | 1.33124                 | -79              | 0.57439                 |
| 171              | 1.9453                  | 41               | 2.13148                 | -89              | 0.420537                |
| 161              | 2.94592                 | 31               | 3.08265                 | -99              | 0.329924                |
| 151              | 3.87012                 | 21               | 4.02968                 | -109             | 0.227092                |
| 141              | 4.55274                 | 11               | 4.75236                 | -119             | 0.172461                |
| 131              | 4.86062                 | 1                | 5.16659                 | -129             | 0.172524                |
| 121              | 4.75769                 | -9               | 5.21122                 | -139             | 0.075323                |
| 111              | 4.34699                 | -19              | 4.9273                  | -149             | 0.049563                |
| 101              | 3.66222                 | -29              | 4.26766                 | -159             | 0                       |
| 91               | 2.78655                 | -39              | 3.3655                  | -169             | 0.1025                  |
| 81               | 1.88347                 | -49              | 2.40003                 | -179             | 0.445313                |
| 71               | 1.23013                 | -59              | 1.55708                 |                  |                         |
| 61               | 0.99762                 | -69              | 0.95876                 |                  |                         |

## 3-Phenylacetamidocyclohexanone (4a-ax, Ring Connection, Axial)

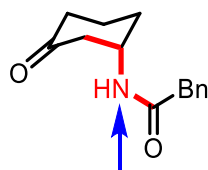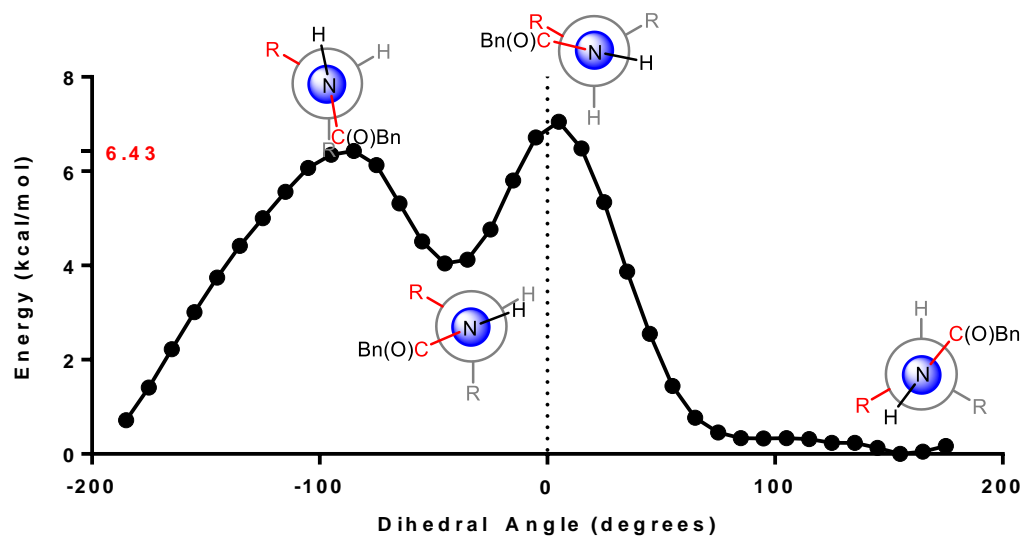

| C-N Dihedral (°) | Total Energy (kcal/mol) | C-N Dihedral (°) | Total Energy (kcal/mol) | C-N Dihedral (°) | Total Energy (kcal/mol) |
|------------------|-------------------------|------------------|-------------------------|------------------|-------------------------|
| 175              | 0.168812                | 45               | 2.548687                | -85              | 6.432337                |
| 165              | 0.050373                | 35               | 3.867727                | -95              | 6.351657                |
| 155              | 0                       | 25               | 5.345097                | -105             | 6.068087                |
| 145              | 0.130946                | 15               | 6.484757                | -115             | 5.563577                |
| 135              | 0.23707                 | 5                | 7.048567                | -125             | 5.001067                |
| 125              | 0.236933                | -5               | 6.713727                | -135             | 4.416177                |
| 115              | 0.314085                | -15              | 5.802997                | -145             | 3.741057                |
| 105              | 0.336201                | -25              | 4.761987                | -155             | 3.008137                |
| 95               | 0.328625                | -35              | 4.123757                | -165             | 2.224157                |
| 85               | 0.337794                | -45              | 4.045967                | -175             | 1.408567                |
| 75               | 0.458013                | -55              | 4.508897                | -185             | 0.719983                |
| 65               | 0.770948                | -65              | 5.316027                |                  |                         |
| 55               | 1.446497                | -75              | 6.132267                |                  |                         |



**3-Phenylacetamido-Cyclohexanone (4a-*eq*, Pendant Group, Equatorial)**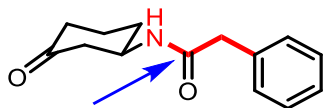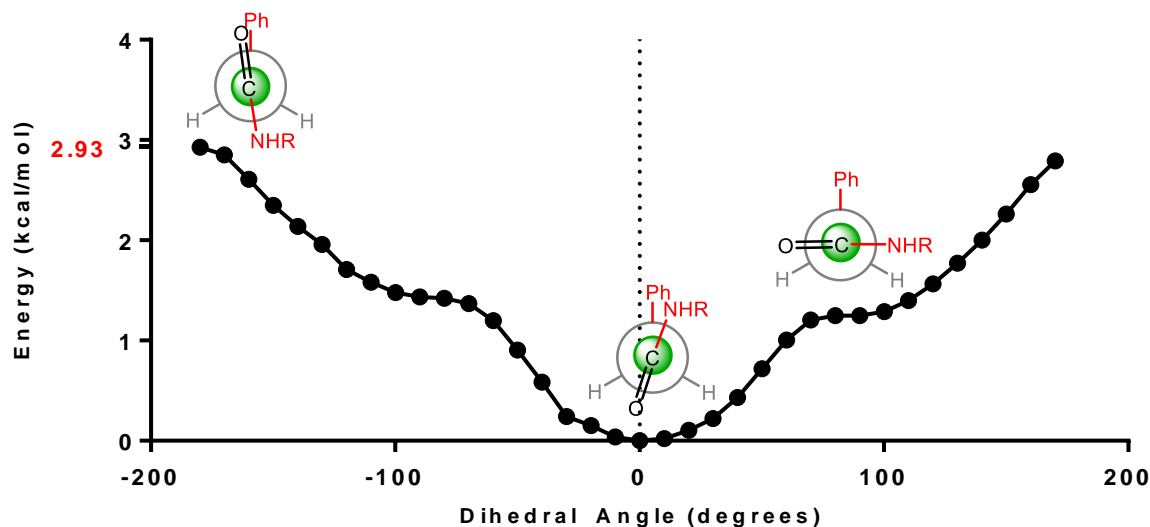

| C-C Dihedral (°) | Total Energy (kcal/mol) | C-C Dihedral (°) | Total Energy (kcal/mol) | C-C Dihedral (°) | Total Energy (kcal/mol) |
|------------------|-------------------------|------------------|-------------------------|------------------|-------------------------|
| 170.1            | 2.790515                | 40.1             | 0.432175                | -89.9            | 1.434145                |
| 160.1            | 2.555405                | 30.1             | 0.222193                | -99.9            | 1.478445                |
| 150.1            | 2.262865                | 20.1             | 0.10659                 | -109.9           | 1.581435                |
| 140.1            | 2.001495                | 10.1             | 0.020838                | -119.9           | 1.707785                |
| 130.1            | 1.770075                | 0.1              | 0                       | -129.9           | 1.956845                |
| 120.1            | 1.566395                | -9.9             | 0.039291                | -139.9           | 2.138395                |
| 110.1            | 1.398525                | -19.9            | 0.151717                | -149.9           | 2.346875                |
| 100.1            | 1.287545                | -29.9            | 0.243295                | -159.9           | 2.609415                |
| 90.1             | 1.249075                | -39.9            | 0.585865                | -169.9           | 2.851165                |
| 80.1             | 1.248485                | -49.9            | 0.906105                | -179.9           | 2.928945                |
| 70.1             | 1.205515                | -59.9            | 1.199115                |                  |                         |
| 60.1             | 1.005125                | -69.9            | 1.367945                |                  |                         |
| 50.1             | 0.718015                | -79.9            | 1.420815                |                  |                         |

### 3-Phenylacetamido-Cycloheximine (S20)

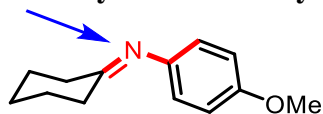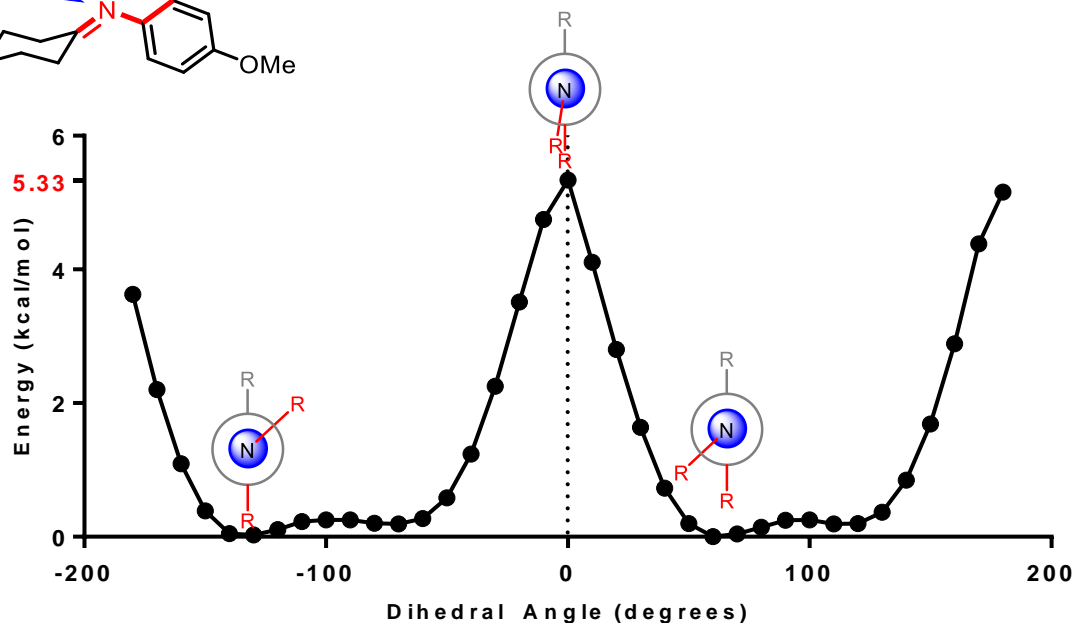

| C-N Dihedral (°) | Total Energy (kcal/mol) | C-N Dihedral (°) | Total Energy (kcal/mol) | C-N Dihedral (°) | Total Energy (kcal/mol) |
|------------------|-------------------------|------------------|-------------------------|------------------|-------------------------|
| -180             | 3.629519                | -50              | 0.580009                | 80               | 0.144708                |
| -170             | 2.201559                | -40              | 1.235449                | 90               | 0.249572                |
| -160             | 1.091568                | -30              | 2.250619                | 100              | 0.253882                |
| -150             | 0.388648                | -20              | 3.510339                | 110              | 0.192838                |
| -140             | 0.048023                | -10              | 4.747619                | 120              | 0.196424                |
| -130             | 0.027703                | 0                | 5.338299                | 130              | 0.368868                |
| -120             | 0.10566                 | 10               | 4.108809                | 140              | 0.848257                |
| -110             | 0.227405                | 20               | 2.803499                | 150              | 1.688439                |
| -100             | 0.253547                | 30               | 1.639299                | 160              | 2.887369                |
| -90              | 0.253553                | 40               | 0.728078                | 170              | 4.384389                |
| -80              | 0.204877                | 50               | 0.199626                | 180              | 5.156599                |
| -70              | 0.194703                | 60               | 0                       |                  |                         |
| -60              | 0.271299                | 70               | 0.043169                |                  |                         |

### 8.3. Calculation of Relative Energies of Phenylcyclohexane Conformers (10-*eq*, 10-*ax*)

#### 8.3.1. Geometry Optimization and Vibrational Frequency Calculation in the Gas Phase [10-*eq*-PhMe, B3LYP/6-311+G(d,p)]

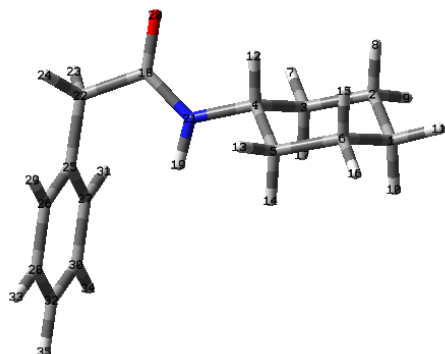

| Tag | Atom | X         | Y         | Z         | Tag | Atom | X         | Y         | Z         |
|-----|------|-----------|-----------|-----------|-----|------|-----------|-----------|-----------|
| 1   | C    | -4.200613 | -1.355929 | 0.229370  | 19  | H    | 0.262171  | -0.216118 | -0.017560 |
| 2   | C    | -3.876256 | -0.186003 | 1.168440  | 20  | O    | -0.433911 | 2.845425  | -0.314841 |
| 3   | C    | -2.367204 | 0.094031  | 1.218784  | 21  | N    | -0.350184 | 0.577534  | -0.143850 |
| 4   | C    | -1.792688 | 0.335735  | -0.188073 | 22  | C    | 1.747229  | 1.876208  | -0.098736 |
| 5   | C    | -2.112837 | -0.836754 | -1.126749 | 23  | H    | 1.956829  | 2.512945  | 0.765374  |
| 6   | C    | -3.621638 | -1.122040 | -1.172808 | 24  | H    | 2.069835  | 2.441491  | -0.977120 |
| 7   | H    | -2.156857 | 0.963074  | 1.848914  | 25  | C    | 2.510335  | 0.576863  | 0.005500  |
| 8   | H    | -4.398185 | 0.714190  | 0.819785  | 26  | C    | 2.948819  | -0.092173 | -1.144599 |
| 9   | H    | -4.249900 | -0.390688 | 2.176612  | 27  | C    | 2.786764  | 0.004549  | 1.254089  |
| 10  | H    | -3.780588 | -2.281176 | 0.645268  | 28  | C    | 3.639399  | -1.299431 | -1.051296 |
| 11  | H    | -5.283524 | -1.504304 | 0.169292  | 29  | H    | 2.751084  | 0.339678  | -2.120539 |
| 12  | H    | -2.234067 | 1.250198  | -0.592441 | 30  | C    | 3.476731  | -1.203128 | 1.351462  |
| 13  | H    | -1.732551 | -0.617061 | -2.129027 | 31  | H    | 2.463551  | 0.512800  | 2.157107  |
| 14  | H    | -1.584438 | -1.733225 | -0.773616 | 32  | C    | 3.904645  | -1.859530 | 0.198063  |
| 15  | H    | -4.133538 | -0.270052 | -1.637886 | 33  | H    | 3.974961  | -1.799083 | -1.953244 |
| 16  | H    | -3.814298 | -1.987623 | -1.814332 | 34  | H    | 3.685277  | -1.627105 | 2.327466  |
| 17  | H    | -1.849443 | -0.762938 | 1.670098  | 35  | H    | 4.445453  | -2.796166 | 0.272350  |
| 18  | C    | 0.212447  | 1.808441  | -0.195252 |     |      |           |           |           |

Calculation Type= OPT+FREQ

Calculation Method= RB3LYP

Basis Set= 6-311+G(d,p)

Charge= 0

Spin= Singlet

E(RB3LYP)= -675.13604022 a.u.

RMS Gradient Norm= 0.00000217 a.u.

Imaginary Freq= 0

Dipole Moment= 4.5348 Debye

Point Group= C1

Job cpu time= 8 hours 4 minutes 5.6 seconds

Zero-point correction= 0.305403 (Hartree/Particle)

Thermal correction to Energy= 0.320223

Thermal correction to Enthalpy= 0.321167

**Thermal correction to Gibbs Free Energy= 0.260410**

Sum of electronic and zero-point Energies= -674.830637

Sum of electronic and thermal Energies= -674.815817

Sum of electronic and thermal Enthalpies= -674.814873

Sum of electronic and thermal Free Energies= -674.875630

**8.3.2.** *Single Point Energy Calculation in PhMe [10-eq, M06-2x/6-311++G(2d,3p), IEF-PCM Solvation Model]*

Calculation Type= SP

Calculation Method= RM062x

Basis Set= 6-311++G(2d,3p)

Charge= 0

Spin= Singlet

E(RM062x)= -674.86312761 a.u.

Dipole Moment= 4.5168 Debye

Point Group= C1

Job cpu time= 1 hours 50 minutes 54.1 seconds

From **Section 8.3.1.:**

Thermal correction to Gibbs free energy= 0.260410

Sum of electronic and thermal free energies= -674.86312761 + 0.260410 =  
**-674.602718 a.u.**

**8.3.3.** *Geometry Optimization and Vibrational Frequency Calculation in the Gas Phase [10-ax, B3LYP/6-311+G(d,p)]*

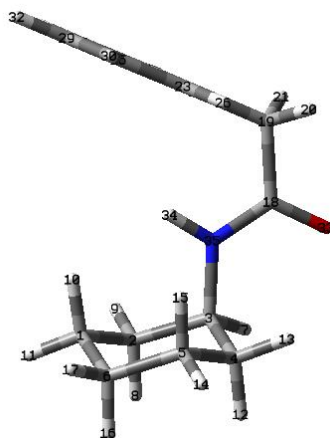

| Tag | Atom | X        | Y         | Z         | Tag | Atom | X         | Y         | Z         |
|-----|------|----------|-----------|-----------|-----|------|-----------|-----------|-----------|
| 1   | C    | 2.107154 | -1.874740 | -0.892920 | 19  | C    | -1.448886 | 2.001486  | 0.240404  |
| 2   | C    | 2.333576 | -0.495732 | -1.534188 | 20  | H    | -1.584724 | 2.456688  | 1.225253  |
| 3   | C    | 2.086447 | 0.667787  | -0.559268 | 21  | H    | -1.861358 | 2.712561  | -0.480557 |
| 4   | C    | 2.895602 | 0.476419  | 0.740191  | 22  | C    | -2.176290 | 0.680831  | 0.160636  |
| 5   | C    | 2.654240 | -0.895643 | 1.384231  | 23  | C    | -2.316406 | -0.131965 | 1.293015  |
| 6   | C    | 2.927669 | -2.038720 | 0.395425  | 24  | C    | -2.714177 | 0.228243  | -1.051091 |
| 7   | H    | 2.394349 | 1.606940  | -1.022888 | 25  | C    | -2.967897 | -1.361827 | 1.216722  |
| 8   | H    | 3.373992 | -0.429529 | -1.872421 | 26  | H    | -1.915678 | 0.205568  | 2.243733  |
| 9   | H    | 1.706099 | -0.371925 | -2.422454 | 27  | C    | -3.366546 | -1.000817 | -1.131613 |
| 10  | H    | 1.042545 | -2.018372 | -0.664796 | 28  | H    | -2.623971 | 0.847855  | -1.937736 |
| 11  | H    | 2.364385 | -2.659413 | -1.611414 | 29  | C    | -3.493978 | -1.801049 | 0.002779  |
| 12  | H    | 3.959372 | 0.579613  | 0.491971  | 30  | H    | -3.070138 | -1.973492 | 2.106284  |
| 13  | H    | 2.653770 | 1.286083  | 1.433194  | 31  | H    | -3.779985 | -1.330140 | -2.078437 |
| 14  | H    | 3.284505 | -1.004672 | 2.272418  | 32  | H    | -4.004834 | -2.755348 | -0.057139 |
| 15  | H    | 1.616649 | -0.958007 | 1.735678  | 33  | O    | 0.695927  | 3.055467  | 0.054438  |
| 16  | H    | 3.995912 | -2.047448 | 0.141748  | 34  | H    | 0.061663  | -0.009386 | -0.305356 |
| 17  | H    | 2.710578 | -3.005678 | 0.860606  | 35  | N    | 0.650164  | 0.809624  | -0.291675 |
| 18  | C    | 0.072544 | 2.005227  | -0.006235 |     |      |           |           |           |

Calculation Type= OPT+FREQ  
 Calculation Method= RB3LYP  
 Basis Set= 6-311+G(d,p)  
 Charge= 0  
 Spin= Singlet  
 E(RB3LYP)= -675.13360998 a.u.  
 RMS Gradient Norm= 0.00000732 a.u.  
 Imaginary Freq= 0  
 Dipole Moment= 4.6895 Debye  
 Point Group= C1  
 Job cpu time= 9 hours 42 minutes 25.5 seconds

Zero-point correction= 0.305668 (Hartree/Particle)  
 Thermal correction to Energy= 0.320323  
 Thermal correction to Enthalpy= 0.321267  
**Thermal correction to Gibbs Free Energy= 0.262023**  
 Sum of electronic and zero-point Energies= -674.827942  
 Sum of electronic and thermal Energies= -674.813287  
 Sum of electronic and thermal Enthalpies= -674.812343  
 Sum of electronic and thermal Free Energies= -674.871587

### 8.3.4. Single Point Energy Calculation in PhMe [10-ax-PhMe, M06-2x/6-311++G(2d,3p), IEF-PCM Solvation Model]

Calculation Type= SP  
 Calculation Method= RM062x

Basis Set= 6-311++G(2d,3p)  
 Charge= 0  
 Spin= Singlet  
 E(RM062x)= -674.86247942 a.u.  
 Dipole Moment= 4.6721 Debye  
 Point Group= C1  
 Job cpu time= 1 hours 59 minutes 34.3 seconds

From **Section 3.3.3.**  
 Thermal correction to Gibbs free energy= 0.262023

Sum of electronic and thermal free energies= -674.86247942 + 0.262023 =  
**-674.600456 a.u.**

**8.3.5.** Calculation of  $\Delta G^\circ$ ,  $K$ , and Equilibrium Ratio Between **10-eq** and **10-ax** using M06-2X/6-311++G(2d,3p) Single-point Energies:

**10-eq:** From **Section 8.3.2.:**  $G^\circ_{eq} = -674.602718$

**10-ax:** From **Section 8.3.4.:**  $G^\circ_{ax} = -674.600456$

Using Equation 1:  $\Delta G^\circ = (-674.600456 + 674.602718) \left( \frac{627.51 \text{ kcal}}{\text{mol}\cdot\text{a.u.}} \right) =$   
 $-1.42 \text{ kcal/mol}$

Using Equation 2:  $K = 0.0911$

Using Equation 3: **10-eq** : **10-ax**  $\rightarrow$  **92** : **8**

**8.4. Calculation of Relative Energies of 3-Phenylacetamidocyclohexanone Conformers (4a-eq, 4a-ax)**

**8.4.1. Geometry Optimization and Vibrational Frequency Calculation in the Gas Phase [4a-eq-PhMe, B3LYP/6-311+G(d,p)]**

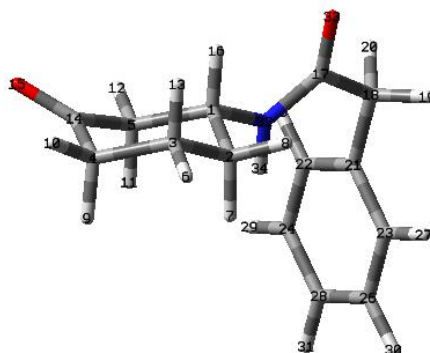

| Tag | Atom | X         | Y         | Z         | Tag | Atom | X         | Y         | Z         |
|-----|------|-----------|-----------|-----------|-----|------|-----------|-----------|-----------|
| 1   | C    | -1.560582 | 0.477193  | -0.044498 | 18  | C    | 2.032218  | 1.792837  | -0.515529 |
| 2   | C    | -2.088885 | 0.552095  | 1.396654  | 19  | H    | 2.344068  | 2.593316  | 0.161013  |
| 3   | C    | -3.611833 | 0.379247  | 1.432188  | 20  | H    | 2.300041  | 2.125501  | -1.522009 |
| 4   | C    | -4.055749 | -0.946487 | 0.783176  | 21  | C    | 2.743292  | 0.504208  | -0.175239 |
| 5   | C    | -1.970351 | -0.848081 | -0.719409 | 22  | C    | 3.031419  | -0.440120 | -1.169413 |
| 6   | H    | -3.971797 | 0.417528  | 2.463376  | 23  | C    | 3.120514  | 0.219248  | 1.143451  |
| 7   | H    | -1.608364 | -0.229610 | 1.999106  | 24  | C    | 3.672883  | -1.637012 | -0.854700 |
| 8   | H    | -1.805449 | 1.514197  | 1.831017  | 25  | H    | 2.755560  | -0.233261 | -2.198580 |
| 9   | H    | -3.698979 | -1.784874 | 1.397031  | 26  | C    | 3.762239  | -0.976975 | 1.461861  |
| 10  | H    | -5.141609 | -1.026124 | 0.713017  | 27  | H    | 2.915985  | 0.943716  | 1.925424  |
| 11  | H    | -1.450271 | -1.677378 | -0.218781 | 28  | C    | 4.039157  | -1.909684 | 0.463057  |
| 12  | H    | -1.688847 | -0.861193 | -1.773200 | 29  | H    | 3.891646  | -2.353073 | -1.638966 |
| 13  | H    | -4.084995 | 1.215378  | 0.905138  | 30  | H    | 4.052220  | -1.176325 | 2.487483  |
| 14  | C    | -3.461861 | -1.125785 | -0.600821 | 31  | H    | 4.542104  | -2.838222 | 0.708142  |
| 15  | O    | -4.122592 | -1.480191 | -1.556345 | 32  | N    | -0.112320 | 0.639911  | -0.115949 |
| 16  | H    | -1.979225 | 1.311598  | -0.612058 | 33  | O    | -0.120566 | 2.816341  | -0.777313 |
| 17  | C    | 0.495067  | 1.798461  | -0.480498 | 34  | H    | 0.474245  | -0.144606 | 0.132074  |

Calculation Type= OPT+FREQ  
 Calculation Method= RB3LYP  
 Basis Set= 6-311+G(d,p)  
 Charge= 0  
 Spin= Singlet  
 E(RB3LYP)= -749.17359328 a.u.  
 RMS Gradient Norm= 0.00000858 a.u.  
 Imaginary Freq= 0  
 Dipole Moment= 6.0272 Debye  
 Point Group= C1  
 Job cpu time= 8 hours 44 minutes 38.2 seconds

Zero-point correction= 0.286418 (Hartree/Particle)  
 Thermal correction to Energy= 0.301926  
 Thermal correction to Enthalpy= 0.302870  
**Thermal correction to Gibbs Free Energy= 0.240667**  
 Sum of electronic and zero-point Energies= -748.887176  
 Sum of electronic and thermal Energies= -748.871667  
 Sum of electronic and thermal Enthalpies= -748.870723  
 Sum of electronic and thermal Free Energies= -748.932926

#### 8.4.2. Single Point Energy Calculation in PhMe [**4a**-eq-PhMe, M06-2x/6-311++G(2d,3p), IEF-PCM Solvation Model]

Calculation Type= SP  
 Calculation Method= RM062x  
 Basis Set= 6-311++G(2d,3p)

Charge= 0  
Spin= Singlet  
E(RM062x)= -748.88205751 a.u.  
Dipole Moment= 5.9610 Debye  
Point Group= C1  
Job cpu time= 1 hours 47 minutes 41.7 seconds

From **Section 8.4.1.**:  
Thermal correction to Gibbs free energy= 0.240667

Sum of electronic and thermal free energies= -748.88205751 + 0.240667 =  
**-748.641391 a.u.**

**8.4.3.** *Geometry Optimization and Vibrational Frequency Calculation in the Gas Phase*  
*[4a-ax-PhMe, B3LYP/6-311+G(d,p)]*

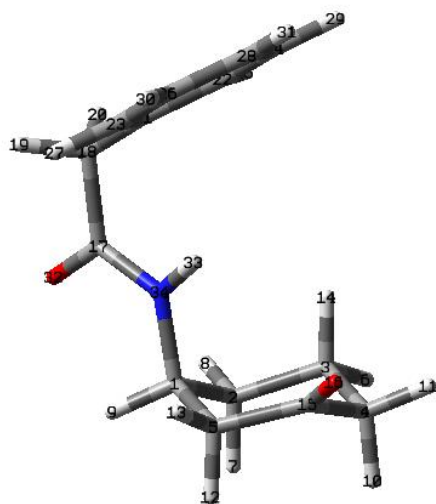



| Tag | Atom | X         | Y         | Z         | Tag | Atom | X         | Y         | Z         |
|-----|------|-----------|-----------|-----------|-----|------|-----------|-----------|-----------|
| 1   | C    | 1.955393  | 0.830796  | -0.641624 | 18  | C    | -1.619239 | 2.056034  | 0.128129  |
| 2   | C    | 2.828760  | 0.928315  | 0.623732  | 19  | H    | -2.074749 | 2.705753  | -0.624172 |
| 3   | C    | 2.677130  | -0.299134 | 1.527665  | 20  | H    | -1.753473 | 2.563474  | 1.087587  |
| 4   | C    | 2.990132  | -1.607128 | 0.772355  | 21  | C    | -2.295706 | 0.705446  | 0.143195  |
| 5   | C    | 2.241495  | -0.474830 | -1.409662 | 22  | C    | -2.416504 | -0.024777 | 1.332475  |
| 6   | H    | 3.337296  | -0.213642 | 2.394682  | 23  | C    | -2.809232 | 0.148906  | -1.035446 |
| 7   | H    | 3.874311  | 1.031889  | 0.309328  | 24  | C    | -3.026498 | -1.278384 | 1.343367  |
| 8   | H    | 2.568470  | 1.841542  | 1.163088  | 25  | H    | -2.035529 | 0.395343  | 2.258044  |
| 9   | H    | 2.179457  | 1.681917  | -1.287272 | 26  | C    | -3.418881 | -1.104438 | -1.028236 |
| 10  | H    | 4.055756  | -1.620406 | 0.505696  | 27  | H    | -2.734206 | 0.704382  | -1.964973 |
| 11  | H    | 2.788162  | -2.492089 | 1.377930  | 28  | C    | -3.528154 | -1.822642 | 0.161940  |
| 12  | H    | 3.255899  | -0.403965 | -1.820113 | 29  | H    | -3.113192 | -1.827300 | 2.274404  |
| 13  | H    | 1.552983  | -0.609888 | -2.245695 | 30  | H    | -3.811102 | -1.517954 | -1.950551 |
| 14  | H    | 1.655507  | -0.344606 | 1.919909  | 31  | H    | -4.002712 | -2.797181 | 0.169062  |
| 15  | C    | 2.206688  | -1.711024 | -0.521958 | 32  | O    | 0.474230  | 3.179438  | -0.210478 |
| 16  | O    | 1.595996  | -2.712389 | -0.841173 | 33  | H    | -0.030544 | 0.071227  | -0.293383 |
| 17  | C    | -0.109198 | 2.101690  | -0.153843 | 34  | N    | 0.524107  | 0.914590  | -0.330414 |

Calculation Type= OPT+FREQ  
 Calculation Method= RB3LYP  
 Basis Set= 6-311+G(d,p)  
 Charge= 0  
 Spin= Singlet  
 E(RB3LYP)= -749.17216200 a.u.  
 RMS Gradient Norm= 0.00000878 a.u.  
 Imaginary Freq= 0  
 Dipole Moment= 1.7764 Debye  
 Point Group= C1  
 Job cpu time= 9 hours 59 minutes 21.8 seconds

Zero-point correction= 0.286463 (Hartree/Particle)  
 Thermal correction to Energy= 0.301888  
 Thermal correction to Enthalpy= 0.302832  
**Thermal correction to Gibbs Free Energy= 0.241144**  
 Sum of electronic and zero-point Energies= -748.885699  
 Sum of electronic and thermal Energies= -748.870274  
 Sum of electronic and thermal Enthalpies= -748.869330  
 Sum of electronic and thermal Free Energies= -748.931018

#### 8.4.4. Single Point Energy Calculation in PhMe [**4a-ax-PhMe**, M06-2x/6-311++G(2d,3p), IEF-PCM Solvation Model]

Calculation Type= SP  
 Calculation Method= RM062x  
 Basis Set= 6-311++G(2d,3p)

Charge= 0  
 Spin= Singlet  
 E(RM062x)= -748.88256752 a.u.  
 Dipole Moment= 1.7871 Debye  
 Point Group= C1  
 Job cpu time= 2 hours 1 minute 32.6 seconds

From **Section 8.4.1.**:

Thermal correction to Gibbs free energy= 0.241144

Sum of electronic and thermal free energies= -748.88256752 + 0.241144 =  
**-748.641424 a.u.**

**8.4.5. Calculation of  $\Delta G^\circ$ ,  $K$ , and Equilibrium Ratio Between **4a-eq** and **4a-ax** using M06-2X/6-311++G(2d,3p) Single-point Energies:**

**4a-eq**: From **Section 8.4.2.**:  $G^\circ_{eq} = -748.641391$

**4a-ax**: From **Section 8.4.4.**:  $G^\circ_{ax} = -748.641424$

Using Equation 1:  $\Delta G^\circ = (-748.641424 + 748.641391) \left( \frac{627.51 \text{ kcal}}{\text{mol}\cdot\text{a.u.}} \right) =$   
 $-0.0207 \text{ kcal/mol}$

Using Equation 2:  $K = 1.04$

Using Equation 3: **4a-eq : 4a-ax** → **49 : 51**

**8.5. Overview of Calculations of the Relative Energies of 3-Amidocycloheximine Conformers [E-8a-eq, Z-8a-eq, E-8a-ax, Z-8a-ax]**

**8.5.1. Calculations for Equatorial (E)-3-Phenylacetamidocyclohexanone [E-8a-eq]**

**8.5.1.1. Geometry Optimization and Vibrational Frequency Calculation in the Gas Phase [E-8a-eq-gas, B3LYP/6-311+G(d,p)]**

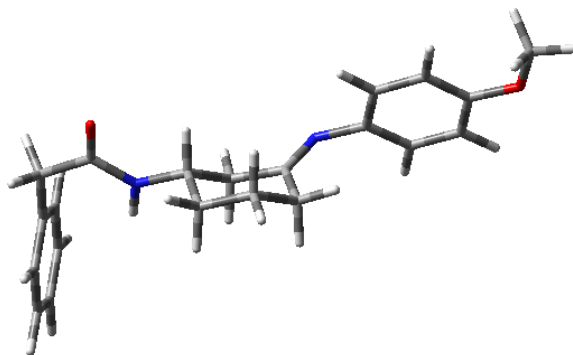

| Tag | Atom | X         | Y         | Z         | Tag | Atom | X         | Y         | Z         |
|-----|------|-----------|-----------|-----------|-----|------|-----------|-----------|-----------|
| 1   | C    | -1.383504 | -0.390603 | 1.572420  | 26  | O    | -7.464421 | 0.660892  | -0.018723 |
| 2   | C    | -0.642278 | -1.737481 | 1.693808  | 27  | C    | -8.222072 | -0.513839 | -0.263018 |
| 3   | C    | 0.862211  | -1.587431 | 1.439736  | 28  | H    | -9.261840 | -0.240440 | -0.089626 |
| 4   | C    | 1.129773  | -0.940284 | 0.071161  | 29  | H    | -8.106730 | -0.858585 | -1.296938 |
| 5   | C    | 0.409273  | 0.415462  | -0.052409 | 30  | H    | -7.941834 | -1.322147 | 0.422127  |
| 6   | H    | -0.816436 | -2.161575 | 2.686805  | 31  | N    | -1.900138 | 0.772204  | -0.579990 |
| 7   | H    | -1.041752 | 0.273399  | 2.378450  | 32  | C    | 3.318659  | -1.716165 | -0.791162 |
| 8   | H    | -2.458980 | -0.519568 | 1.693288  | 33  | C    | 4.804703  | -1.376726 | -1.009756 |
| 9   | H    | 1.312919  | -0.964381 | 2.223456  | 34  | O    | 2.874923  | -2.792131 | -1.163760 |
| 10  | H    | 1.356236  | -2.561588 | 1.475865  | 35  | H    | 4.959703  | -1.443024 | -2.090442 |
| 11  | H    | 0.760619  | -1.614654 | -0.706700 | 36  | H    | 5.361621  | -2.209823 | -0.573280 |
| 12  | H    | 0.855774  | 1.117220  | 0.667992  | 37  | C    | 5.315260  | -0.057815 | -0.480063 |
| 13  | H    | 0.530032  | 0.835080  | -1.051868 | 38  | C    | 5.247866  | 1.104737  | -1.259042 |
| 14  | H    | -1.063663 | -2.447965 | 0.973248  | 39  | C    | 5.854417  | 0.037759  | 0.809205  |
| 15  | C    | -1.067690 | 0.294862  | 0.258094  | 40  | C    | 5.699253  | 2.326737  | -0.763466 |
| 16  | C    | -3.299188 | 0.685676  | -0.387827 | 41  | H    | 4.842225  | 1.050044  | -2.264400 |
| 17  | C    | -4.001466 | -0.492044 | -0.646146 | 42  | C    | 6.308147  | 1.257653  | 1.307806  |
| 18  | C    | -4.027446 | 1.833270  | -0.038583 | 43  | H    | 5.924846  | -0.853413 | 1.425020  |
| 19  | C    | -5.393989 | -0.542539 | -0.535505 | 44  | C    | 6.230452  | 2.407107  | 0.522891  |
| 20  | H    | -3.458658 | -1.379284 | -0.952575 | 45  | H    | 5.642056  | 3.213823  | -1.384409 |
| 21  | C    | -5.407494 | 1.787825  | 0.085410  | 46  | H    | 6.727017  | 1.308833  | 2.306700  |
| 22  | H    | -3.496934 | 2.762635  | 0.134375  | 47  | H    | 6.586266  | 3.355942  | 0.907997  |
| 23  | C    | -6.103830 | 0.598692  | -0.161434 | 48  | N    | 2.555244  | -0.764069 | -0.190338 |
| 24  | H    | -5.902537 | -1.473510 | -0.747856 | 49  | H    | 3.004447  | 0.086421  | 0.117071  |
| 25  | H    | -5.970503 | 2.670411  | 0.365126  |     |      |           |           |           |

Calculation Type= OPT+FREQ

Calculation Method= RB3LYP

Basis Set= 6-311+G(d,p)

Charge= 0

Spin= Singlet

E(RB3LYP)= -1074.93768906 a.u.

RMS Gradient Norm= 0.00000330 a.u.

Imaginary Freq= 0

Dipole Moment= 3.3110 Debye

Point Group= C1

Job cpu time= 1 day 17 hours 47 minutes 15.5 seconds

Zero-point correction= 0.411025 (Hartree/Particle)

Thermal correction to Energy= 0.434045

Thermal correction to Enthalpy= 0.434989

**Thermal correction to Gibbs Free Energy= 0.353194**

Sum of electronic and zero-point Energies= -1074.526664

Sum of electronic and thermal Energies= -1074.503644

Sum of electronic and thermal Enthalpies= -1074.502700

Sum of electronic and thermal Free Energies= -1074.584495

**8.5.1.2.** *Single Point Energy Calculation in the Gas Phase [E-8a-eq-gas, M06-2x/6-311++G(2d,3p)]*

Calculation Type= SP

Calculation Method= RM062x

Basis Set= 6-311++G(2d,3p)

Charge= 0

Spin= Singlet

E(RM062x)= -1074.52784267 a.u.

Dipole Moment= 3.3268 Debye

Point Group= C1

Job cpu time= 4 hours 38 minutes 36.2 seconds

From **Section 8.5.1.1.:**

Thermal correction to Gibbs free energy= 0.353194

Sum of electronic and thermal free energies= -1074.52784267 + 0.353194 =  
**-1074.174649 a.u.**

**8.5.1.3.** *Single Point Energy Calculation in the Gas Phase [E-8a-eq-gas, B3LYP/6-311++G(2d,3p)]*

Calculation Type= SP

Calculation Method= RB3LYP

Basis Set= 6-311++G(2d,3p)

Charge= 0

Spin= Singlet

E(RB3LYP)= -1074.97514250 a.u.

Dipole Moment= 3.6837 Debye

Point Group= C1

Job cpu time= 4 hours 25 minutes 48.5 seconds

From **Section 8.5.1.1.:**

Thermal correction to Gibbs free energy= 0.353194

Sum of electronic and thermal free energies= -1074.97514250 + 0.353194 =  
**-1074.621949 a.u.**

**8.5.1.4.** *Single Point Energy Calculation in the Gas Phase [E-8a-eq-gas, MP2/6-311+G(2d,3p)]*

Calculation Type= SP

Calculation Method= RMP2-FC

Basis Set= 6-311+G(2d,3p)

Charge= 0

Spin= Singlet

E(MP2)= - 1072.05755474 a.u.

Dipole Moment= 4.1450 Debye

Point Group= C1

Job cpu time= 20 hours 25 minutes 21.4 seconds

From **Section 8.5.1.1.**:

Thermal correction to Gibbs free energy= 0.353194

Sum of electronic and thermal free energies= - 1072.05755474 + 0.353194 =  
**-1071.704361 a.u.**

**8.5.1.5.**      *Geometry Optimization and Vibrational Frequency Calculation in PhMe*  
*[E-8a-eq-PhMe, B3LYP/6-311+G(d,p), IEF-PCM Solvation Model]*

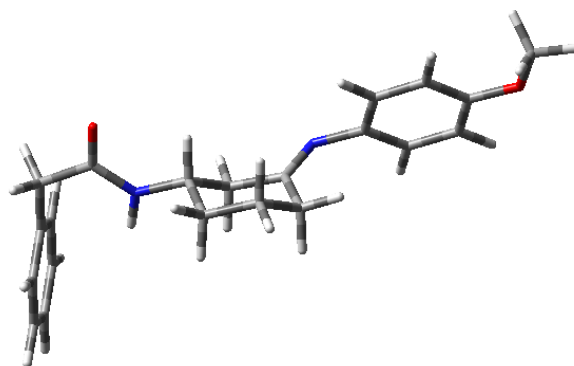

| Tag | Atom | X         | Y         | Z         | Tag | Atom | X         | Y         | Z         |
|-----|------|-----------|-----------|-----------|-----|------|-----------|-----------|-----------|
| 1   | C    | -1.367431 | -0.312174 | 1.601522  | 26  | O    | -7.466715 | 0.651051  | -0.055322 |
| 2   | C    | -0.636149 | -1.659695 | 1.768415  | 27  | C    | -8.214454 | -0.552051 | -0.190002 |
| 3   | C    | 0.867114  | -1.532219 | 1.494403  | 28  | H    | -9.257481 | -0.272206 | -0.052335 |
| 4   | C    | 1.127721  | -0.936533 | 0.101354  | 29  | H    | -8.085689 | -0.992944 | -1.184231 |
| 5   | C    | 0.413861  | 0.419752  | -0.064159 | 30  | H    | -7.932068 | -1.285072 | 0.573233  |
| 6   | H    | -0.802678 | -2.040436 | 2.779805  | 31  | N    | -1.899007 | 0.756709  | -0.597437 |
| 7   | H    | -1.007257 | 0.381425  | 2.373427  | 32  | C    | 3.287521  | -1.687061 | -0.865320 |
| 8   | H    | -2.441569 | -0.427105 | 1.744109  | 33  | C    | 4.777802  | -1.364628 | -1.067032 |
| 9   | H    | 1.329929  | -0.885513 | 2.251102  | 34  | O    | 2.818237  | -2.721808 | -1.327631 |
| 10  | H    | 1.352152  | -2.509395 | 1.564751  | 35  | H    | 4.937649  | -1.399583 | -2.148226 |
| 11  | H    | 0.751153  | -1.632508 | -0.652328 | 36  | H    | 5.321097  | -2.218095 | -0.652556 |
| 12  | H    | 0.866837  | 1.141636  | 0.630799  | 37  | C    | 5.306682  | -0.070502 | -0.494671 |
| 13  | H    | 0.536663  | 0.803180  | -1.077631 | 38  | C    | 5.243012  | 1.118688  | -1.233112 |
| 14  | H    | -1.070972 | -2.394741 | 1.081514  | 39  | C    | 5.862154  | -0.027040 | 0.790564  |
| 15  | C    | -1.061371 | 0.315016  | 0.257065  | 40  | C    | 5.713868  | 2.317751  | -0.700713 |
| 16  | C    | -3.298188 | 0.673405  | -0.400679 | 41  | H    | 4.825092  | 1.103284  | -2.234713 |
| 17  | C    | -3.990939 | -0.530290 | -0.542606 | 42  | C    | 6.335058  | 1.170453  | 1.325939  |
| 18  | C    | -4.037326 | 1.844417  | -0.171915 | 43  | H    | 5.930504  | -0.940024 | 1.373668  |
| 19  | C    | -5.383876 | -0.580297 | -0.436366 | 44  | C    | 6.260615  | 2.347358  | 0.581922  |
| 20  | H    | -3.440837 | -1.440738 | -0.752781 | 45  | H    | 5.659375  | 3.226569  | -1.289583 |
| 21  | C    | -5.418218 | 1.801002  | -0.050679 | 46  | H    | 6.766257  | 1.182422  | 2.320778  |
| 22  | H    | -3.515418 | 2.790923  | -0.088493 | 47  | H    | 6.631134  | 3.278447  | 0.995503  |
| 23  | C    | -6.104570 | 0.587367  | -0.182120 | 48  | N    | 2.553351  | -0.780281 | -0.173447 |
| 24  | H    | -5.884734 | -1.531472 | -0.557524 | 49  | H    | 3.028025  | 0.032476  | 0.193856  |
| 25  | H    | -5.987070 | 2.704214  | 0.136826  |     |      |           |           |           |

Calculation Type= OPT+FREQ

Calculation Method= RB3LYP

Basis Set= 6-311+G(d,p)

Charge= 0

Spin= Singlet

E(RB3LYP)= -1074.94582698 a.u.

RMS Gradient Norm= 0.00000178 a.u.

Imaginary Freq= 0

Dipole Moment= 4.2899 Debye

Point Group= C1

Job cpu time= 2 days 0 hours 3 minutes 59.7 seconds

Zero-point correction= 0.410975 (Hartree/Particle)

Thermal correction to Energy= 0.433945

Thermal correction to Enthalpy= 0.434889

**Thermal correction to Gibbs Free Energy= 0.353483**

Sum of electronic and zero-point Energies= -1074.534852

Sum of electronic and thermal Energies= -1074.511882

Sum of electronic and thermal Enthalpies= -1074.510938  
Sum of electronic and thermal Free Energies= -1074.592344

**8.5.1.6.**      *Single Point Energy Calculation in PhMe [E-8a-eq-PhMe, M06-2x/6-311++G(2d,3p), IEF-PCM Solvation Model]*

Calculation Type= SP  
Calculation Method= RM062x  
Basis Set= 6-311++G(2d,3p)  
Charge= 0  
Spin= Singlet  
E(RM062x)= -1074.53549318 a.u.  
Dipole Moment= 4.2875 Debye  
Point Group= C1  
Job cpu time= 4 hours 52 minutes 30.3 seconds

From **Section 8.5.1.5.:**  
Thermal correction to Gibbs free energy= 0.353483

Sum of electronic and thermal free energies= -1074.53549318 +0.353483 =  
**-1074.182010 a.u.**

**8.5.1.7.**      *Single Point Energy Calculation in PhMe [E-8a-eq-PhMe, B3LYP/6-311++G(2d,3p), IEF-PCM Solvation Model]*

Calculation Type= SP  
Calculation Method= RB3LYP  
Basis Set= 6-311++G(2d,3p)  
Charge= 0  
Spin= Singlet  
E(RB3LYP)= -1074.98295081 a.u.  
Dipole Moment= 4.2480 Debye  
Point Group= C1  
Job cpu time= 4 hours 24 minutes 35.3 seconds

From **Section 8.5.1.5.:**  
Thermal correction to Gibbs free energy= 0.353483

Sum of electronic and thermal free energies= -1074.98295081 + 0.353483 =  
**-1074.629468 a.u.**

**8.5.1.8.**      *Single Point Energy Calculation in PhMe [E-8a-eq-PhMe, MP2/6-311+G(2d,3p), IEF-PCM Solvation Model]*

Calculation Type= SP  
Calculation Method= RMP2-FC  
Basis Set= 6-311+G(2d,3p)  
Charge= 0

Spin= Singlet

E(MP2)= -1072.06505596 a.u.

Dipole Moment= 4.7210 Debye

Point Group= C1

Job cpu time= 18 hours 3 minutes 23.6 seconds

From **Section 8.5.1.5.:**

Thermal correction to Gibbs free energy= 0.353483

Sum of electronic and thermal free energies= -1072.06505596 + 0.353483 =  
**-1071.711573 a.u.**

## 8.5.2. Calculations for Equatorial (*Z*)-3-Phenylacetamidocyclohexanone [*Z*-8a-*eq*]

### 8.5.2.1. *Geometry Optimization and Vibrational Frequency Calculation in the Gas Phase [Z-8a-*eq*-gas, B3LYP/6-311+G(d,p)]*

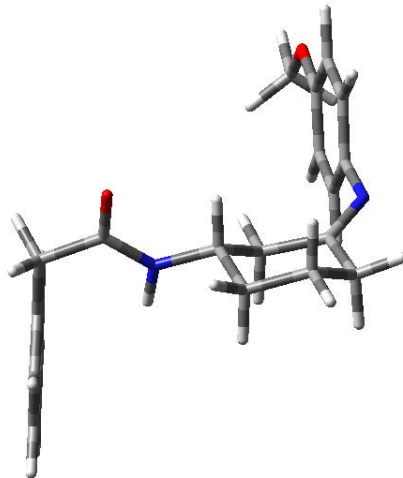



| Tag | Atom | X         | Y         | Z         | Tag | Atom | X         | Y         | Z         |
|-----|------|-----------|-----------|-----------|-----|------|-----------|-----------|-----------|
| 1   | C    | -0.645815 | 3.547072  | -1.424423 | 26  | O    | -5.265393 | -2.449473 | 0.803205  |
| 2   | C    | 0.454681  | 4.084401  | -0.491580 | 27  | C    | -5.303650 | -3.628834 | 0.015064  |
| 3   | C    | 1.541793  | 3.033506  | -0.241185 | 28  | H    | -5.935501 | -4.330518 | 0.557536  |
| 4   | C    | 0.933995  | 1.740898  | 0.324682  | 29  | H    | -5.739855 | -3.437785 | -0.972010 |
| 5   | C    | -0.165646 | 1.176472  | -0.599642 | 30  | H    | -4.304624 | -4.062757 | -0.107580 |
| 6   | H    | 0.894546  | 4.988528  | -0.922035 | 31  | N    | -2.470631 | 2.117590  | -0.803522 |
| 7   | H    | -0.214100 | 3.381168  | -2.421764 | 32  | C    | 2.562038  | 0.550411  | 1.765742  |
| 8   | H    | -1.466170 | 4.257308  | -1.534831 | 33  | C    | 3.604925  | -0.579035 | 1.858335  |
| 9   | H    | 2.063523  | 2.804557  | -1.180113 | 34  | O    | 2.317410  | 1.239048  | 2.744675  |
| 10  | H    | 2.290229  | 3.410861  | 0.460505  | 35  | H    | 3.244282  | -1.241011 | 2.650666  |
| 11  | H    | 0.498203  | 1.965013  | 1.301880  | 36  | H    | 4.510994  | -0.107560 | 2.247702  |
| 12  | H    | 0.301529  | 0.847300  | -1.539375 | 37  | C    | 3.909343  | -1.366032 | 0.606010  |
| 13  | H    | -0.629222 | 0.302906  | -0.140814 | 38  | C    | 3.176252  | -2.514908 | 0.281732  |
| 14  | H    | 0.005559  | 4.379432  | 0.463845  | 39  | C    | 4.922468  | -0.955921 | -0.270216 |
| 15  | C    | -1.207344 | 2.232600  | -0.931697 | 40  | C    | 3.443215  | -3.229694 | -0.884702 |
| 16  | C    | -3.099543 | 0.916750  | -0.408358 | 41  | H    | 2.393222  | -2.854473 | 0.952401  |
| 17  | C    | -3.096286 | -0.225732 | -1.210661 | 42  | C    | 5.192823  | -1.668282 | -1.437262 |
| 18  | C    | -3.861005 | 0.897872  | 0.771438  | 43  | H    | 5.508681  | -0.073949 | -0.031750 |
| 19  | C    | -3.810074 | -1.370536 | -0.844746 | 44  | C    | 4.452272  | -2.807542 | -1.748977 |
| 20  | H    | -2.548710 | -0.218512 | -2.146691 | 45  | H    | 2.867824  | -4.119644 | -1.114424 |
| 21  | C    | -4.554264 | -0.239526 | 1.152043  | 46  | H    | 5.985205  | -1.337074 | -2.099269 |
| 22  | H    | -3.898694 | 1.789573  | 1.386392  | 47  | H    | 4.663857  | -3.365121 | -2.654273 |
| 23  | C    | -4.536800 | -1.384717 | 0.345948  | 48  | N    | 1.942175  | 0.712824  | 0.565081  |
| 24  | H    | -3.789972 | -2.232190 | -1.498816 | 49  | H    | 2.233210  | 0.128410  | -0.205373 |
| 25  | H    | -5.131240 | -0.259289 | 2.068967  |     |      |           |           |           |

Calculation Type= OPT+FREQ

Calculation Method= RB3LYP

Basis Set= 6-311+G(d,p)

Charge= 0

Spin= Singlet

E(RB3LYP)= -1074.93757447 a.u.

RMS Gradient Norm= 0.00000307 a.u.

Imaginary Freq= 0

Dipole Moment= 5.5514 Debye

Point Group= C1

Job cpu time= 1 day 21 hours 25 minutes 42.2 seconds

Zero-point correction= 0.411029 (Hartree/Particle)

Thermal correction to Energy= 0.434011

Thermal correction to Enthalpy= 0.434956

**Thermal correction to Gibbs Free Energy= 0.353995**

Sum of electronic and zero-point Energies= -1074.526545

Sum of electronic and thermal Energies= -1074.503563

Sum of electronic and thermal Enthalpies= -1074.502619

Sum of electronic and thermal Free Energies= -1074.583579

**8.5.2.2.** *Single Point Energy Calculation in the Gas Phase [Z-8a-eq-gas, M06-2x/6-311++G(2d,3p)]*

Calculation Type= SP

Calculation Method= RM062x

Basis Set= 6-311++G(2d,3p)

Charge= 0

Spin= Singlet

E(RM062x)= -1074.52754083 a.u.

Dipole Moment= 5.4525 Debye

Point Group= C1

Job cpu time= 4 hours 59 minutes 34.2 seconds

From **Section 8.5.2.1.**:

Thermal correction to Gibbs free energy= 0.353995

Sum of electronic and thermal free energies= -1074.52754083 + 0.353995 =  
**-1074.173546 a.u.**

**8.5.2.3.** *Single Point Energy Calculation in the Gas Phase [Z-8a-eq-gas, B3LYP/6-311++G(2d,3p)]*

Calculation Type= SP

Calculation Method= RB3LYP

Basis Set= 6-311++G(2d,3p)

Charge= 0

Spin= Singlet

E(RB3LYP)= -1074.97505935 a.u.

Dipole Moment= 5.4471 Debye

Point Group= C1

Job cpu time= 4 hours 46 minutes 34.7 seconds

From **Section 8.5.2.1.**:

Thermal correction to Gibbs free energy= 0.353995

Sum of electronic and thermal free energies= -1074.97505935 + 0.353995 =  
**-1074.621064 a.u.**

**8.5.2.4.** *Single Point Energy Calculation in the Gas Phase [Z-8a-eq-gas, MP2/6-311+G(2d,3p)]*

Calculation Type= SP

Calculation Method= RMP2-FC

Basis Set= 6-311+G(2d,3p)

Charge= 0

Spin= Singlet

E(MP2)= - 1072.05775965 a.u.

Dipole Moment= 6.1586 Debye

Point Group= C1

Job cpu time= 19 hours 26 minutes 31.4 seconds

From **Section 8.5.2.1.**:

Thermal correction to Gibbs free energy= 0.353995

Sum of electronic and thermal free energies= -1072.05775965 + 0.353995 =  
**-1071.703765 a.u.**

**8.5.2.5.**      *Geometry Optimization and Vibrational Frequency Calculation in PhMe  
[Z-8a-eq-PhMe, B3LYP/6-311+G(d,p), IEF-PCM Solvation Model]*

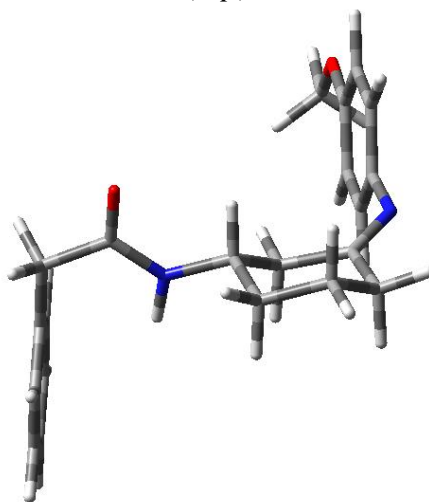

| Tag | Atom | X         | Y         | Z         | Tag | Atom | X         | Y         | Z         |
|-----|------|-----------|-----------|-----------|-----|------|-----------|-----------|-----------|
| 1   | C    | -0.634175 | 3.557761  | -1.418426 | 26  | O    | -5.244101 | -2.458160 | 0.783267  |
| 2   | C    | 0.466935  | 4.098568  | -0.488458 | 27  | C    | -5.285354 | -3.632599 | -0.018994 |
| 3   | C    | 1.553646  | 3.048246  | -0.234460 | 28  | H    | -5.915258 | -4.339247 | 0.518595  |
| 4   | C    | 0.944707  | 1.760377  | 0.340097  | 29  | H    | -5.725057 | -3.429171 | -1.001186 |
| 5   | C    | -0.157905 | 1.192232  | -0.579900 | 30  | H    | -4.286740 | -4.063481 | -0.148359 |
| 6   | H    | 0.907105  | 4.999271  | -0.925022 | 31  | N    | -2.462329 | 2.127126  | -0.803241 |
| 7   | H    | -0.202310 | 3.384911  | -2.414203 | 32  | C    | 2.511472  | 0.498430  | 1.795511  |
| 8   | H    | -1.451292 | 4.271095  | -1.533424 | 33  | C    | 3.564922  | -0.619845 | 1.870676  |
| 9   | H    | 2.072744  | 2.814329  | -1.173229 | 34  | O    | 2.211443  | 1.124487  | 2.806438  |
| 10  | H    | 2.304322  | 3.431229  | 0.462020  | 35  | H    | 3.206973  | -1.304202 | 2.644702  |
| 11  | H    | 0.511316  | 1.987113  | 1.317086  | 36  | H    | 4.464507  | -0.148095 | 2.275380  |
| 12  | H    | 0.307871  | 0.855501  | -1.516951 | 37  | C    | 3.886953  | -1.375260 | 0.602808  |
| 13  | H    | -0.621857 | 0.322889  | -0.113870 | 38  | C    | 3.161274  | -2.519401 | 0.246102  |
| 14  | H    | 0.018993  | 4.398870  | 0.465757  | 39  | C    | 4.909752  | -0.942652 | -0.251185 |
| 15  | C    | -1.197203 | 2.246289  | -0.921468 | 40  | C    | 3.445378  | -3.208855 | -0.931655 |
| 16  | C    | -3.087023 | 0.921594  | -0.409548 | 41  | H    | 2.371130  | -2.875396 | 0.899506  |
| 17  | C    | -3.083810 | -0.215809 | -1.219654 | 42  | C    | 5.196738  | -1.629723 | -1.430047 |
| 18  | C    | -3.842983 | 0.892749  | 0.773387  | 43  | H    | 5.490253  | -0.064345 | 0.013138  |
| 19  | C    | -3.793999 | -1.364694 | -0.859569 | 44  | C    | 4.463959  | -2.764948 | -1.774432 |
| 20  | H    | -2.536539 | -0.202857 | -2.155763 | 45  | H    | 2.876014  | -4.095565 | -1.187304 |
| 21  | C    | -4.534195 | -0.249011 | 1.147878  | 46  | H    | 5.996067  | -1.282074 | -2.074995 |
| 22  | H    | -3.878903 | 1.777970  | 1.397983  | 47  | H    | 4.688867  | -3.302778 | -2.688443 |
| 23  | C    | -4.518163 | -1.388401 | 0.333126  | 48  | N    | 1.953158  | 0.731896  | 0.581109  |
| 24  | H    | -3.772565 | -2.222217 | -1.518865 | 49  | H    | 2.281072  | 0.186300  | -0.203613 |
| 25  | H    | -5.106805 | -0.274105 | 2.067606  |     |      |           |           |           |

Calculation Type= OPT+FREQ  
 Calculation Method= RB3LYP  
 Basis Set= 6-311+G(d,p)  
 Charge= 0  
 Spin= Singlet  
 E(RB3LYP)= -1074.94572757 a.u.  
 RMS Gradient Norm= 0.00000310 a.u.  
 Imaginary Freq= 0  
 Dipole Moment= 6.5238 Debye  
 Point Group= C1  
 Job cpu time= 2 days 2 hours 31 minutes 2.7 seconds

Zero-point correction= 0.411045 (Hartree/Particle)  
 Thermal correction to Energy= 0.433977  
 Thermal correction to Enthalpy= 0.434921  
**Thermal correction to Gibbs Free Energy= 0.354235**  
 Sum of electronic and zero-point Energies= -1074.534682  
 Sum of electronic and thermal Energies= -1074.511751

Sum of electronic and thermal Enthalpies= -1074.510807

Sum of electronic and thermal Free Energies= -1074.591493

**8.5.2.6.** *Single Point Energy Calculation in PhMe [Z-8a-eq-PhMe, M06-2x/6-311++G(2d,3p), IEF-PCM Solvation Model]*

Calculation Type= SP

Calculation Method= RM062x

Basis Set= 6-311++G(2d,3p)

Charge= 0

Spin= Singlet

E(RM062x)= -1074.53530951 a.u.

Dipole Moment= 6.4058 Debye

Point Group= C1

Job cpu time= 5 hours 14 minutes 25.7 seconds

From **Section 8.5.2.5.:**

Thermal correction to Gibbs free energy= 0.354235

Sum of electronic and thermal free energies= -1074.53530951 + 0.354235 =  
**-1074.181075 a.u.**

**8.5.2.7.** *Single Point Energy Calculation in PhMe [Z-8a-eq-PhMe, B3LYP/6-311++G(2d,3p), IEF-PCM Solvation Model]*

Calculation Type= SP

Calculation Method= RB3LYP

Basis Set= 6-311++G(2d,3p)

Charge= 0

Spin= Singlet

E(RB3LYP)= -1074.98286924 a.u.

Dipole Moment= 6.3276 Debye

Point Group= C1

Job cpu time= 5 hours 2 minutes 8.4 seconds

From **Section 8.5.2.5.:**

Thermal correction to Gibbs free energy= 0.354235

Sum of electronic and thermal free energies= -1074.98286924 + 0.354235 =  
**-1074.628634 a.u.**

**8.5.2.8.** *Single Point Energy Calculation in PhMe [Z-8a-eq-PhMe, MP2/6-311+G(2d,3p), IEF-PCM Solvation Model]*

Calculation Type= SP

Calculation Method= RMP2-FC

Basis Set= 6-311+G(2d,3p)

Charge= 0

Spin= Singlet

E(MP2)= -1072.06526480 a.u.

Dipole Moment= 7.0588 Debye

Point Group= C1

Job cpu time= 20 hours 10 minutes 34.5 seconds

From **Section 8.5.2.5.:**

Thermal correction to Gibbs free energy= 0.354235

Sum of electronic and thermal free energies= -1072.06526480 + 0.354235 =  
**-1071.711030 a.u.**

### 8.5.3. Calculations for Axial (*E*)-3-Phenylacetamidocyclohexanone [*E*-8a-ax-PhMe]

#### 8.5.3.1. *Geometry Optimization and Vibrational Frequency Calculation in the Gas Phase [E-8a-ax-gas, B3LYP/6-311+G(d,p)]*

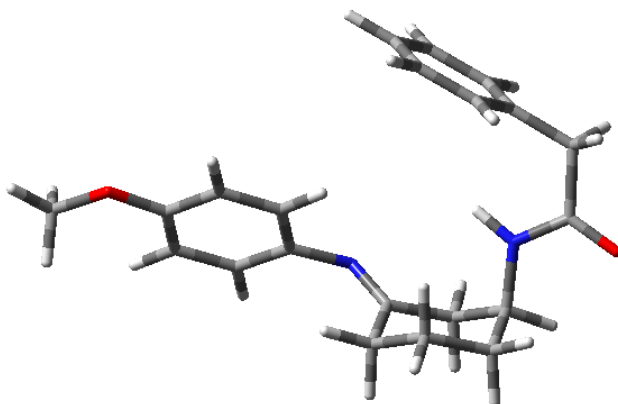

| Tag | Atom | X         | Y         | Z         | Tag | Atom | X         | Y         | Z         |
|-----|------|-----------|-----------|-----------|-----|------|-----------|-----------|-----------|
| 1   | C    | -1.276133 | -2.449160 | 1.242776  | 26  | O    | 5.569939  | 0.890926  | -0.763286 |
| 2   | C    | -2.504649 | -2.190505 | 0.348914  | 27  | C    | 6.828479  | 0.472391  | -0.257958 |
| 3   | C    | -2.299453 | -2.804968 | -1.049173 | 28  | H    | 7.575617  | 1.046352  | -0.804077 |
| 4   | C    | -0.996555 | -2.333719 | -1.705345 | 29  | H    | 6.921978  | 0.684398  | 0.813180  |
| 5   | C    | 0.229434  | -2.588416 | -0.801445 | 30  | H    | 6.995649  | -0.596616 | -0.432246 |
| 6   | H    | -3.387817 | -2.645727 | 0.802414  | 31  | N    | 0.778905  | -1.212401 | 1.219181  |
| 7   | H    | -1.220157 | -3.529909 | 1.421206  | 32  | C    | -4.000880 | -0.251809 | 0.012020  |
| 8   | H    | -1.377055 | -1.954554 | 2.210225  | 33  | C    | -4.163300 | 1.277922  | 0.057004  |
| 9   | H    | -2.284187 | -3.896573 | -0.940143 | 34  | O    | -4.962867 | -0.965678 | -0.234192 |
| 10  | H    | -3.161837 | -2.561524 | -1.673407 | 35  | H    | -4.765240 | 1.482774  | 0.948042  |
| 11  | H    | -0.853016 | -2.840263 | -2.664143 | 36  | H    | -4.794004 | 1.527470  | -0.799041 |
| 12  | H    | -1.063950 | -1.263061 | -1.926762 | 37  | C    | -2.909428 | 2.119921  | 0.062779  |
| 13  | H    | 0.360244  | -3.672962 | -0.684296 | 38  | C    | -2.320875 | 2.530031  | -1.140477 |
| 14  | H    | 1.141820  | -2.197623 | -1.251964 | 39  | C    | -2.298163 | 2.499313  | 1.264216  |
| 15  | C    | 0.012228  | -2.007570 | 0.581190  | 40  | C    | -1.155150 | 3.293005  | -1.143381 |
| 16  | C    | 1.995160  | -0.731942 | 0.677729  | 41  | H    | -2.786004 | 2.255145  | -2.081983 |
| 17  | C    | 3.208700  | -1.162692 | 1.215880  | 42  | C    | -1.128868 | 3.258763  | 1.265164  |
| 18  | C    | 2.021166  | 0.259723  | -0.314849 | 43  | H    | -2.744153 | 2.201141  | 2.208002  |
| 19  | C    | 4.424791  | -0.655862 | 0.753879  | 44  | C    | -0.553445 | 3.657728  | 0.060711  |
| 20  | H    | 3.201226  | -1.904073 | 2.006681  | 45  | H    | -0.719325 | 3.607073  | -2.085503 |
| 21  | C    | 3.225462  | 0.777643  | -0.770206 | 46  | H    | -0.670230 | 3.540009  | 2.206334  |
| 22  | H    | 1.088145  | 0.638222  | -0.716740 | 47  | H    | 0.354363  | 4.250019  | 0.060079  |
| 23  | C    | 4.438221  | 0.319923  | -0.245056 | 48  | H    | -2.019221 | -0.102298 | 0.499062  |
| 24  | H    | 5.344776  | -1.023158 | 1.188883  | 49  | N    | -2.764886 | -0.748962 | 0.284369  |
| 25  | H    | 3.247207  | 1.544990  | -1.535051 |     |      |           |           |           |

Calculation Type= OPT+FREQ  
 Calculation Method= RB3LYP  
 Basis Set= 6-311+G(d,p)  
 Charge= 0  
 Spin= Singlet  
 E(RB3LYP)= -1074.93715038 a.u.  
 RMS Gradient Norm= 0.00000384 a.u.  
 Imaginary Freq= 0  
 Dipole Moment= 3.8089 Debye  
 Point Group= C1  
 Job cpu time= 2 days 7 hours 1 minute 39.0 seconds

Zero-point correction= 0.411457 (Hartree/Particle)  
 Thermal correction to Energy= 0.434239  
 Thermal correction to Enthalpy= 0.435183  
**Thermal correction to Gibbs Free Energy= 0.355119**  
 Sum of electronic and zero-point Energies= -1074.525693

Sum of electronic and thermal Energies= -1074.502911  
Sum of electronic and thermal Enthalpies= -1074.501967  
Sum of electronic and thermal Free Energies= -1074.582032

**8.5.3.2.** *Single Point Energy Calculation in the Gas Phase [E-8a-ax-gas, M06-2x/6-311++G(2d,3p)]*

Calculation Type= SP  
Calculation Method= RM062x  
Basis Set= 6-311++G(2d,3p)  
Charge= 0  
Spin= Singlet  
E(RB3LYP)= -1074.53026985 a.u.  
Dipole Moment= 3.7430 Debye  
Point Group= C1  
Job cpu time= 5 hours 34 minutes 56.7 seconds

From **Section 8.5.3.1.**:  
Thermal correction to Gibbs free energy= 0.355119

Sum of electronic and thermal free energies= -1074.97438976 + 0.355119 =  
**-1074.175151 a.u.**

**8.5.3.3.** *Single Point Energy Calculation in the Gas Phase [E-8a-ax-gas, B3LYP/6-311++G(2d,3p)]*

Calculation Type= SP  
Calculation Method= RB3LYP  
Basis Set= 6-311++G(2d,3p)  
Charge= 0  
Spin= Singlet  
E(RB3LYP)= -1074.97438976 a.u.  
Dipole Moment= 3.8107 Debye  
Point Group= C1  
Job cpu time= 5 hours 20 minutes 20.1 seconds

From **Section 3.5.3.1.**:  
Thermal correction to Gibbs free energy= 0.355119

Sum of electronic and thermal free energies= -1074.97438976 + 0.355119 =  
**-1074.619271 a.u.**

**8.5.3.4.** *Single Point Energy Calculation in the Gas Phase [E-8a-ax-gas, MP2/6-311+G(2d,3p)]*

Calculation Type= SP  
Calculation Method= RMP2-FC  
Basis Set= 6-311+G(2d,3p)



Charge= 0  
Spin= Singlet  
E(MP2)= -1072.06282823 a.u.  
Dipole Moment= 3.8196 Debye  
Point Group= C1  
Job cpu time= 1 day 1 hour 40 minutes 14.9 seconds

From **Section 8.5.3.1.**:  
Thermal correction to Gibbs free energy= 0.355119

Sum of electronic and thermal free energies= -1072.06282823 + 0.355199 =  
**-1071.707709 a.u.**

**8.5.3.5.** *Geometry Optimization and Vibrational Frequency Calculation in PhMe  
[E-8a-ax-PhMe, B3LYP/6-311+G(d,p), IEF-PCM Solvation Model]*

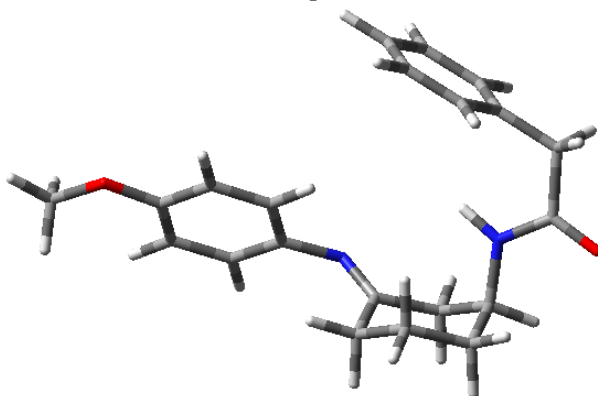

| Tag | Atom | X         | Y         | Z         | Tag | Atom | X         | Y         | Z         |
|-----|------|-----------|-----------|-----------|-----|------|-----------|-----------|-----------|
| 1   | C    | 1.247850  | -2.434511 | -1.238177 | 26  | O    | -5.603619 | 0.912443  | 0.752463  |
| 2   | C    | 2.478710  | -2.203650 | -0.339446 | 27  | C    | -6.863320 | 0.505520  | 0.230149  |
| 3   | C    | 2.260815  | -2.821853 | 1.054636  | 28  | H    | -7.611408 | 1.079054  | 0.774767  |
| 4   | C    | 0.962808  | -2.336104 | 1.709480  | 29  | H    | -6.943300 | 0.728930  | -0.838982 |
| 5   | C    | -0.263207 | -2.575325 | 0.801942  | 30  | H    | -7.036781 | -0.563423 | 0.393530  |
| 6   | H    | 3.351443  | -2.672583 | -0.797605 | 31  | N    | -0.807973 | -1.196908 | -1.217445 |
| 7   | H    | 1.180676  | -3.512191 | -1.429669 | 32  | C    | 4.020651  | -0.292643 | -0.035968 |
| 8   | H    | 1.360274  | -1.930413 | -2.199339 | 33  | C    | 4.203479  | 1.233561  | -0.048036 |
| 9   | H    | 2.230701  | -3.912141 | 0.940105  | 34  | O    | 4.986904  | -1.025354 | 0.154150  |
| 10  | H    | 3.122957  | -2.592928 | 1.684976  | 35  | H    | 4.817231  | 1.448205  | -0.928307 |
| 11  | H    | 0.810752  | -2.844800 | 2.665499  | 36  | H    | 4.827632  | 1.459121  | 0.819807  |
| 12  | H    | 1.041743  | -1.267016 | 1.935185  | 37  | C    | 2.961937  | 2.094424  | -0.048792 |
| 13  | H    | -0.402614 | -3.657876 | 0.678365  | 38  | C    | 2.357985  | 2.474888  | 1.156900  |
| 14  | H    | -1.172581 | -2.180062 | 1.254200  | 39  | C    | 2.382354  | 2.524992  | -1.248779 |
| 15  | C    | -0.040180 | -1.991052 | -0.577479 | 40  | C    | 1.206026  | 3.259099  | 1.163320  |
| 16  | C    | -2.025958 | -0.717053 | -0.677070 | 41  | H    | 2.799381  | 2.160191  | 2.097354  |
| 17  | C    | -3.238725 | -1.137389 | -1.226289 | 42  | C    | 1.227765  | 3.307140  | -1.246062 |
| 18  | C    | -2.053565 | 0.265885  | 0.324225  | 43  | H    | 2.840998  | 2.249175  | -2.193131 |
| 19  | C    | -4.455648 | -0.628017 | -0.768584 | 44  | C    | 0.635637  | 3.675876  | -0.039531 |
| 20  | H    | -3.231589 | -1.873692 | -2.021971 | 45  | H    | 0.757057  | 3.549084  | 2.106919  |
| 21  | C    | -3.258581 | 0.786695  | 0.775823  | 46  | H    | 0.793881  | 3.629825  | -2.185710 |
| 22  | H    | -1.121582 | 0.634204  | 0.737765  | 47  | H    | -0.260739 | 4.285396  | -0.036082 |
| 23  | C    | -4.470628 | 0.340122  | 0.238298  | 48  | H    | 2.029263  | -0.103282 | -0.431106 |
| 24  | H    | -5.374459 | -0.987096 | -1.212592 | 49  | N    | 2.771737  | -0.767909 | -0.265053 |
| 25  | H    | -3.278799 | 1.547701  | 1.547240  |     |      |           |           |           |

Calculation Type= OPT+FREQ

Calculation Method= RB3LYP

Basis Set= 6-311+G(d,p)

Charge= 0

Spin= Singlet

E(RB3LYP)= -1074.94470654 a.u.

RMS Gradient Norm= 0.00000405 a.u.

Imaginary Freq= 0

Dipole Moment= 4.4063 Debye

Point Group= C1

Job cpu time= 1 day 18 hours 38 minute 48.6 seconds

Zero-point correction= 0.411235 (Hartree/Particle)

Thermal correction to Energy= 0.434081

Thermal correction to Enthalpy= 0.435025

**Thermal correction to Gibbs Free Energy= 0.354317**

Sum of electronic and zero-point Energies= -1074.533472

Sum of electronic and thermal Energies= -1074.510626

Sum of electronic and thermal Enthalpies= -1074.509682

Sum of electronic and thermal Free Energies= -1074.590389

**8.5.3.6.** *Single Point Energy Calculation in PhMe [E-8a-ax-PhMe, M06-2x/6-311++G(2d,3p), IEF-PCM Solvation Model]*

Calculation Type= SP

Calculation Method= RM062x

Basis Set= 6-311++G(2d,3p)

Charge= 0

Spin= Singlet

E(RM062x)= -1074.53722972 a.u.

Dipole Moment= 4.3479 Debye

Point Group= C1

Job cpu time= 5 hours 50 minutes 5.5 seconds

From **Section 8.5.3.5.:**

Thermal correction to Gibbs free energy= 0.354317

Sum of electronic and thermal free energies= -1074.53722972 + 0.354317 =  
**-1074.182913 a.u.**

**8.5.3.7.** *Single Point Energy Calculation in PhMe [E-8a-ax-PhMe, B3LYP/6-311++G(2d,3p), IEF-PCM Solvation Model]*

Calculation Type= SP

Calculation Method= RB3LYP

Basis Set= 6-311++G(2d,3p)

Charge= 0

Spin= Singlet

E(RB3LYP)= -1074.98163782 a.u.

Dipole Moment= 4.3128 Debye

Point Group= C1

Job cpu time= 5 hours 35 minutes 6.1 seconds

From **Section 8.5.3.5.:**

Thermal correction to Gibbs free energy= 0.354317

Sum of electronic and thermal free energies= -1074.98163782 + 0.354317 =  
**-1074.627321 a.u.**

**8.5.3.8.** *Single Point Energy Calculation in PhMe [E-8a-ax-PhMe, MP2/6-311+G(2d,3p), IEF-PCM Solvation Model]*

Calculation Type= SP

Calculation Method= RMP2-FC

Basis Set= 6-311+G(2d,3p)

Charge= 0

Spin= Singlet

E(MP2)= -1072.06980022 a.u.

Dipole Moment= 4.2719 Debye

Point Group= C1

Job cpu time= 21 hours 51 minutes 31.4 seconds

From **Section 8.5.3.5.**:

Thermal correction to Gibbs free energy= 0.354317

Sum of electronic and thermal free energies= -1072.06980022 + 0.354317 =  
**-1071.715483 a.u.**

#### 8.5.4. Calculations for Axial (Z)-3-Phenylacetamidocyclohexanone [Z-8a-ax]

##### 8.5.4.1. *Geometry Optimization and Vibrational Frequency Calculation in the Gas Phase [Z-8a-ax-gas, B3LYP/6-311+G(d,p)]*

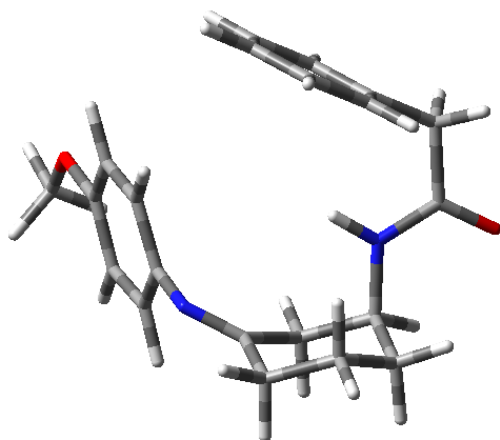

| Tag | Atom | X         | Y         | Z         | Tag | Atom | X         | Y         | Z         |
|-----|------|-----------|-----------|-----------|-----|------|-----------|-----------|-----------|
| 1   | C    | -0.109158 | -2.360014 | 0.403634  | 26  | O    | 5.192293  | 1.259098  | 0.701409  |
| 2   | C    | -1.542521 | -2.137250 | 0.932905  | 27  | C    | 6.208008  | 0.562897  | 1.407952  |
| 3   | C    | -2.575037 | -2.910918 | 0.092828  | 28  | H    | 6.907974  | 1.323229  | 1.750982  |
| 4   | C    | -2.476942 | -2.559473 | -1.394838 | 29  | H    | 5.799815  | 0.029621  | 2.273964  |
| 5   | C    | -1.051414 | -2.785010 | -1.933695 | 30  | H    | 6.734279  | -0.146338 | 0.759260  |
| 6   | H    | -1.597551 | -2.486321 | 1.965254  | 31  | N    | 0.866274  | -1.364848 | -1.675965 |
| 7   | H    | 0.147906  | -3.410355 | 0.587630  | 32  | C    | -2.677854 | -0.174261 | 1.915884  |
| 8   | H    | 0.598567  | -1.749873 | 0.965243  | 33  | C    | -2.903957 | 1.346866  | 1.868080  |
| 9   | H    | -2.395466 | -3.984318 | 0.232095  | 34  | O    | -3.215358 | -0.847343 | 2.783639  |
| 10  | H    | -3.574822 | -2.704142 | 0.482079  | 35  | H    | -2.381967 | 1.750701  | 2.741076  |
| 11  | H    | -3.187125 | -3.157462 | -1.973248 | 36  | H    | -3.970167 | 1.484192  | 2.062763  |
| 12  | H    | -2.760445 | -1.511868 | -1.546398 | 37  | C    | -2.489553 | 2.087444  | 0.618372  |
| 13  | H    | -0.837951 | -3.863609 | -1.919992 | 38  | C    | -3.333390 | 2.123949  | -0.500182 |
| 14  | H    | -0.947417 | -2.444699 | -2.964954 | 39  | C    | -1.260339 | 2.752720  | 0.544399  |
| 15  | C    | 0.001217  | -2.099074 | -1.090246 | 40  | C    | -2.958572 | 2.800706  | -1.658175 |
| 16  | C    | 1.944664  | -0.751488 | -1.002609 | 41  | H    | -4.295699 | 1.623218  | -0.458398 |
| 17  | C    | 2.931247  | -1.481769 | -0.335709 | 42  | C    | -0.882707 | 3.433562  | -0.612782 |
| 18  | C    | 2.106954  | 0.639713  | -1.107298 | 43  | H    | -0.595135 | 2.743615  | 1.401991  |
| 19  | C    | 4.035662  | -0.849961 | 0.242048  | 44  | C    | -1.730131 | 3.458671  | -1.718137 |
| 20  | H    | 2.853416  | -2.561958 | -0.283415 | 45  | H    | -3.627517 | 2.820422  | -2.511374 |
| 21  | C    | 3.187384  | 1.276563  | -0.518995 | 46  | H    | 0.070596  | 3.949112  | -0.645873 |
| 22  | H    | 1.367315  | 1.212567  | -1.654377 | 47  | H    | -1.439463 | 3.990082  | -2.617209 |
| 23  | C    | 4.162020  | 0.537377  | 0.163393  | 48  | H    | -1.461077 | -0.090019 | 0.275127  |
| 24  | H    | 4.781906  | -1.452222 | 0.742987  | 49  | N    | -1.841382 | -0.703235 | 0.981777  |
| 25  | H    | 3.306801  | 2.351454  | -0.587246 |     |      |           |           |           |

Calculation Type= OPT+FREQ

Calculation Method= RB3LYP

Basis Set= 6-311+G(d,p)

Charge= 0

Spin= Singlet

E(RB3LYP)= -1074.93639794 a.u.

RMS Gradient Norm= 0.00000378 a.u.

Imaginary Freq= 0

Dipole Moment= 2.1076 Debye

Point Group= C1

Job cpu time= 2 days 4 hours 24 minute 15.3 seconds

Zero-point correction= 0.411250 (Hartree/Particle)

Thermal correction to Energy= 0.434061

Thermal correction to Enthalpy= 0.435005

**Thermal correction to Gibbs Free Energy= 0.354808**

Sum of electronic and zero-point Energies= -1074.525148

Sum of electronic and thermal Energies= -1074.502337

Sum of electronic and thermal Enthalpies= -1074.501393

Sum of electronic and thermal Free Energies= -1074.581589

**8.5.4.2.** *Single Point Energy Calculation in the Gas Phase [Z-8a-ax-gas, M06-2x/6-311++G(2d,3p)]*

Calculation Type= SP

Calculation Method= RM062x

Basis Set= 6-311++G(2d,3p)

Charge= 0

Spin= Singlet

E(RM062x)= -1074.52906559 a.u.

Dipole Moment= 2.0474 Debye

Point Group= C1

Job cpu time= 5 hours 39 minutes 36.3 seconds

From **Section 8.5.4.1.:**

Thermal correction to Gibbs free energy= 0.354808

Sum of electronic and thermal free energies= -1074.52906559 + 0.354808 =  
**-1074.174258 a.u.**

**8.5.4.3.** *Single Point Energy Calculation in the Gas Phase [Z-8a-ax-gas, B3LYP/6-311++G(2d,3p)]*

Calculation Type= SP

Calculation Method= RB3LYP

Basis Set= 6-311++G(2d,3p)

Charge= 0

Spin= Singlet

E(RB3LYP)= -1074.97365512 a.u.

Dipole Moment= 2.0790 Debye

Point Group= C1

Job cpu time= 5 hours 24 minutes 12.0 seconds

From **Section 8.5.4.1.:**

Thermal correction to Gibbs free energy= 0.354808

Sum of electronic and thermal free energies= -1074.97365512 + 0.354808 =  
**-1074.618847 a.u.**

**8.5.4.4.** *Single Point Energy Calculation in the Gas Phase [Z-8a-ax-gas, MP2/6-311+G(2d,3p)]*

Calculation Type= SP

Calculation Method= RMP2-FC

Basis Set= 6-311+G(2d,3p)

Charge= 0

Spin= Singlet

E(MP2)= -1072.06194618 a.u.

Dipole Moment= 1.9607 Debye

Point Group= C1

Job cpu time= 1 day 2 hours 25 minutes 16.9 seconds

From **Section 8.5.4.1.**:

Thermal correction to Gibbs free energy= 0.354808

Sum of electronic and thermal free energies= -1072.06194618 + 0.354808 =  
**-1071.707138 a.u.**

**8.5.4.5.**      *Geometry Optimization and Vibrational Frequency Calculation in PhMe  
[Z-8a-ax-PhMe, B3LYP/6-311+G(d,p), IEF-PCM Solvation Model]*

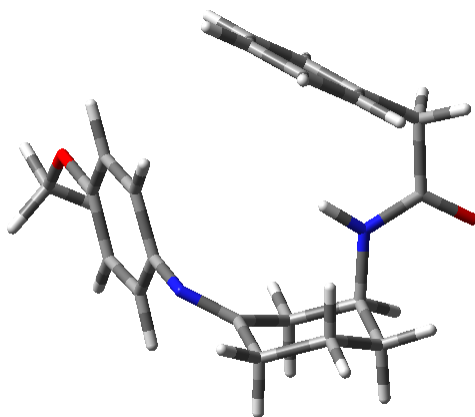

| Tag | Atom | X         | Y         | Z         | Tag | Atom | X         | Y         | Z         |
|-----|------|-----------|-----------|-----------|-----|------|-----------|-----------|-----------|
| 1   | C    | -0.111573 | -2.337202 | 0.404051  | 26  | O    | 5.197805  | 1.254673  | 0.704140  |
| 2   | C    | -1.547291 | -2.132003 | 0.933995  | 27  | C    | 6.212733  | 0.553317  | 1.414236  |
| 3   | C    | -2.570515 | -2.920190 | 0.096675  | 28  | H    | 6.914063  | 1.311471  | 1.758297  |
| 4   | C    | -2.477046 | -2.571230 | -1.391748 | 29  | H    | 5.799728  | 0.022253  | 2.278405  |
| 5   | C    | -1.050021 | -2.785513 | -1.930618 | 30  | H    | 6.736218  | -0.156455 | 0.765168  |
| 6   | H    | -1.592203 | -2.479865 | 1.966771  | 31  | N    | 0.870063  | -1.364610 | -1.681480 |
| 7   | H    | 0.160241  | -3.382093 | 0.595863  | 32  | C    | -2.680615 | -0.166223 | 1.924362  |
| 8   | H    | 0.587413  | -1.713404 | 0.961330  | 33  | C    | -2.935912 | 1.347756  | 1.852752  |
| 9   | H    | -2.377099 | -3.990383 | 0.238937  | 34  | O    | -3.187132 | -0.830395 | 2.823448  |
| 10  | H    | -3.573936 | -2.724963 | 0.482840  | 35  | H    | -2.445687 | 1.771651  | 2.734326  |
| 11  | H    | -3.180571 | -3.178889 | -1.967653 | 36  | H    | -4.009805 | 1.467082  | 2.016319  |
| 12  | H    | -2.771665 | -1.527256 | -1.546900 | 37  | C    | -2.504507 | 2.084296  | 0.606035  |
| 13  | H    | -0.826834 | -3.861764 | -1.911846 | 38  | C    | -3.323414 | 2.099609  | -0.531503 |
| 14  | H    | -0.952554 | -2.449850 | -2.964117 | 39  | C    | -1.284544 | 2.769136  | 0.556811  |
| 15  | C    | -0.001101 | -2.089947 | -1.091456 | 40  | C    | -2.932518 | 2.775059  | -1.685582 |
| 16  | C    | 1.948166  | -0.749694 | -1.005493 | 41  | H    | -4.278311 | 1.583850  | -0.508806 |
| 17  | C    | 2.932867  | -1.481688 | -0.336999 | 42  | C    | -0.891258 | 3.448640  | -0.596174 |
| 18  | C    | 2.111618  | 0.641348  | -1.108589 | 43  | H    | -0.639775 | 2.776489  | 1.429813  |
| 19  | C    | 4.037432  | -0.851640 | 0.242569  | 44  | C    | -1.713461 | 3.452515  | -1.721365 |
| 20  | H    | 2.852457  | -2.561516 | -0.281700 | 45  | H    | -3.581656 | 2.778221  | -2.554127 |
| 21  | C    | 3.193204  | 1.276869  | -0.519221 | 46  | H    | 0.054321  | 3.978987  | -0.611230 |
| 22  | H    | 1.372624  | 1.218088  | -1.652667 | 47  | H    | -1.410343 | 3.982514  | -2.617165 |
| 23  | C    | 4.166424  | 0.535930  | 0.163879  | 48  | H    | -1.511280 | -0.090129 | 0.258312  |
| 24  | H    | 4.781228  | -1.455053 | 0.745541  | 49  | N    | -1.866407 | -0.701139 | 0.980169  |
| 25  | H    | 3.310452  | 2.352150  | -0.586940 |     |      |           |           |           |

Calculation Type= OPT+FREQ

Calculation Method= RB3LYP

Basis Set= 6-311+G(d,p)

Charge= 0

Spin= Singlet

E(RB3LYP)= -1074.94418700 a.u.

RMS Gradient Norm= 0.00000455 a.u.

Imaginary Freq= 0

Dipole Moment= 2.3991 Debye

Point Group= C1

Job cpu time= 2 days 6 hours 37 minute 28.2 seconds

Zero-point correction= 0.411121 (Hartree/Particle)

Thermal correction to Energy= 0.433938

Thermal correction to Enthalpy= 0.434883

**Thermal correction to Gibbs Free Energy= 0.354862**

Sum of electronic and zero-point Energies= -1074.533066

Sum of electronic and thermal Energies= -1074.510249



Sum of electronic and thermal Enthalpies= -1074.509304

Sum of electronic and thermal Free Energies= -1074.589325

**8.5.4.6.** *Single Point Energy Calculation in PhMe [Z-8a-ax-PhMe, M06-2x/6-311++G(2d,3p), IEF-PCM Solvation Model]*

Calculation Type= SP

Calculation Method= RM062x

Basis Set= 6-311++G(2d,3p)

Charge= 0

Spin= Singlet

E(RM062x)= -1074.53643923 a.u.

Dipole Moment= 2.3422 Debye

Point Group= C1

Job cpu time= 5 hours 56 minutes 47.3 seconds

From **Section 8.5.4.5.:**

Thermal correction to Gibbs free energy= 0.354862

Sum of electronic and thermal free energies= -1074.53643923 + 0.354862 =  
**-1074.181577 a.u.**

**8.5.4.7.** *Single Point Energy Calculation in PhMe [Z-8a-ax-PhMe, B3LYP/6-311++G(2d,3p), IEF-PCM Solvation Model]*

Calculation Type= SP

Calculation Method= RB3LYP

Basis Set= 6-311++G(2d,3p)

Charge= 0

Spin= Singlet

E(RB3LYP)= -1074.98110154 a.u.

Dipole Moment= 2.3621 Debye

Point Group= C1

Job cpu time= 5 hours 39 minutes 35.3 seconds

From **Section 8.5.4.5.:**

Thermal correction to Gibbs free energy= 0.354862

Sum of electronic and thermal free energies= -1074.98110154 + 0.354862 =  
**-1074.626240 a.u.**

**8.5.4.8.** *Single Point Energy Calculation in PhMe [Z-8a-ax-PhMe, MP2/6-311+G(2d,3p), IEF-PCM Solvation Model]*

Calculation Type= SP

Calculation Method= RMP2-FC

Basis Set= 6-311+G(2d,3p)

Charge= 0

Spin= Singlet  
 E(MP2)= -1072.06911047 a.u.  
 Dipole Moment= 2.1946 Debye  
 Point Group= C1  
 Job cpu time= 23 hours 47 minutes 33.5 seconds

From **Section 8.5.4.5.:**  
 Thermal correction to Gibbs free energy= 0.354862

Sum of electronic and thermal free energies= -1072.06911047 + 0.354862 =  
**-1071.714248 a.u.**

### 8.5.5. Calculation of $\Delta G^\circ$ , K, and Equilibrium Ratio Between [E-8a-*eq*, Z-8a-*eq*, E-8a-*ax*, Z-8a-*ax*] using Single-point Energies:

These values are taken at the M062x level of theory, with the IEF-PCM solvation model using PhMe and equilibrium ratios are determined using equations 1–5.

E-8a-*ax*: From **Section 8.5.3.6.:**  $G_A^\circ = -1074.182913$   
 E-8a-*eq*: From **Section 8.5.1.6.:**  $G_B^\circ = -1074.182010$   
 Z-8a-*ax*: From **Section 8.5.4.6.:**  $G_C^\circ = -1074.181577$   
 Z-8a-*eq*: From **Section 8.5.2.6.:**  $G_D^\circ = -1074.181075$

$$\begin{aligned} \text{Eq 1: } \Delta G_{B/A}^\circ &= (-1074.182010 + 1074.182913) \left( \frac{627.51 \text{ kcal}}{\text{mol}\cdot\text{a.u.}} \right) = -0.567 \text{ kcal/mol} \\ \Delta G_{C/A}^\circ &= (-1074.181577 + 1074.182913) \left( \frac{627.51 \text{ kcal}}{\text{mol}\cdot\text{a.u.}} \right) = -0.838 \text{ kcal/mol} \\ \Delta G_{D/A}^\circ &= (-1074.181075 + 1074.182913) \left( \frac{627.51 \text{ kcal}}{\text{mol}\cdot\text{a.u.}} \right) = -1.15 \text{ kcal/mol} \end{aligned}$$

$$\begin{aligned} \text{Eq 2: } K_{A/A} &= 1 \\ K_{B/A} &= 0.384 \\ K_{C/A} &= 0.243 \\ K_{D/A} &= 0.143 \end{aligned}$$

$$\text{Eq 4: } K_{TOT} = 0.384 + 0.243 + 0.143 + 1 = 1.77$$

$$\begin{aligned} \text{Eq 5: } \%_A &= \frac{K_{A/A}}{K_{TOT}} \cdot 100 = \frac{1}{1.77} \cdot 100 = 56\% \\ \%_B &= \frac{K_{B/A}}{K_{TOT}} \cdot 100 = \frac{0.384}{1.77} \cdot 100 = 22\% \\ \%_C &= \frac{K_{C/A}}{K_{TOT}} \cdot 100 = \frac{0.243}{1.77} \cdot 100 = 14\% \\ \%_D &= \frac{K_{D/A}}{K_{TOT}} \cdot 100 = \frac{0.143}{1.77} \cdot 100 = 8\% \end{aligned}$$

A summary of all the calculated equilibrium percentages at various levels of theory and phases is shown below.

| Phase | Theory | <i>E</i> -8a-ax | <i>E</i> -8a-eq | <i>Z</i> -8a-ax | <i>Z</i> -8a-eq |
|-------|--------|-----------------|-----------------|-----------------|-----------------|
| Gas   | M062x  | 46              | 27              | 18              | 9               |
|       | B3LYP  | 4               | 67              | 3               | 26              |
|       | MP2    | 71              | 0.5             | 28              | 0.5             |
| PhMe  | M062x  | 56              | 22              | 14              | 8               |
|       | B3LYP  | 6               | 65              | 2               | 27              |
|       | MP2    | 77              | 1               | 21              | 1               |

**Table S22:** Summary of values indicate equilibrium percentages of each species, depending on theory and solvation model.

## 10. References

- <sup>1</sup> CrysAlisPro; Rigaku OD: The Woodlands, TX, 2015.
- <sup>2</sup> Sheldrick, G. M. A short history of SHELX. *Acta Cryst.* **2008**, *A64*, 112–122.
- <sup>3</sup> The work was partially supported by the facilities and staff of the Yale University Faculty of Arts and Science High Performance Computing Center, and by the National Science Foundation under the grant that partially funded acquisition of the facilities (#CNS 08-21132).
- <sup>4</sup> Gaussian 09, Revision C.01, M. J. Frisch, G. W. Trucks, H. B. Schlegel, G. E. Scuseria, M. A. Robb, J. R. Cheeseman, G. Scalmani, V. Barone, B. Mennucci, G. A. Petersson, H. Nakatsuji, M. Caricato, X. Li, H. P. Hratchian, A. F. Izmaylov, J. Bloino, G. Zheng, J. L. Sonnenberg, M. Hada, M. Ehara, K. Toyota, R. Fukuda, J. Hasegawa, M. Ishida, T. Nakajima, Y. Honda, O. Kitao, H. Nakai, T. Vreven, J. A. Montgomery, Jr., J. E. Peralta, F. Ogliaro, M. Bearpark, J. J. Heyd, E. Brothers, K. N. Kudin, V. N. Staroverov, T. Keith, R. Kobayashi, J. Normand, K. Raghavachari, A. Rendell, J. C. Burant, S. S. Iyengar, J. Tomasi, M. Cossi, N. Rega, J. M. Millam, M. Klene, J. E. Knox, J. B. Cross, V. Bakken, C. Adamo, J. Jaramillo, R. Gomperts, R. E. Stratmann, O. Yazyev, A. J. Austin, R. Cammi, C. Pomelli, J. W. Ochterski, R. L. Martin, K. Morokuma, V. G. Zakrzewski, G. A. Voth, P. Salvador, J. J. Dannenberg, S. Dapprich, A. D. Daniels, O. Farkas, J. B. Foresman, J. V. Ortiz, J. Cioslowski, and D. J. Fox, Gaussian, Inc., Wallingford CT, 2010.
- <sup>5</sup> For a review on solvation models, see: Tomasi, J.; Mennucci, B.; Cammi, R. Quantum Mechanism Continuum Solvation Models. *Chem. Rev.* **2005**, *105*, 2999–3093.
- <sup>6</sup> For recent combinations of the M06-2x functional with the IEF-PCM solvation model, see: a. Simon, A.; Lam, Y.-h.; Houk, K. N. Transition States of Vicinal Diamine-Catalyzed Aldol Reactions *J. Am. Chem. Soc.* **2016**, *138*, 503–506. b. Sowlati-Hashjin, S.; Wetmore, S. D. Quantum mechanical study of the beta- and delta-lyase reactions during the base excision repair process: application to FPG. *Phys. Chem. Chem. Phys.* **2015**, *17*, 24696–24706. c. Lopez, S. A.; Munk, M. E.; Houk, K. N. Mechanisms and Transitions States of 1,3-Dipolar Cycloadditions on Phenyl Azide with Enamines: A Computational Analysis. *J. Org. Chem.* **2013**, *78*, 1576–1582.
- <sup>7</sup> Zhao, Y. & Truhlar, D. G. The M06 suite of density functionals for main group thermochemistry, thermochemical kinetics, noncovalent interactions, excited states, and transition elements: two new functionals and systematic testing of four M06-class functionals and 12 other functionals. *Theor. Chem. Acc.* **2008**, *120*, 215–241.
- <sup>8</sup> For recent energy difference calculations performed on chair conformations using M06-2X functional, see: a. Jahn, M. K.; Dewald, D.; Vallejo-Lopez, M.; Cocinero, E. J.; Lesarri, A.; Grabow, J.-U. Rotational Spectra of Bicyclic Decanes: The Trans Conformation of (–)-Lupine. *J. Phys. Chem. A* **2013**, *117*, 13673–13679. b. Cocinero, E. J.; Lesarri, A.; Eciija, P.; Basterretxea, F. J.; Grabow, J.-U.; Fernandez, J. A.; Castano, F. Ribose Found in the Gas Phase. *Angew. Chem. Int. Ed.* **2012**, *51*, 3119–3124. c. Grayson, M. N.; Pellegrinet, S. C.; Goodman, J. M. Mechanistic Insights into the BINOL-Derived Phosphoric Acid-Catalyzed Asymmetric Allylboration of Aldehydes. *J. Am. Chem. Soc.* **2012**, *134*, 2716–2722. d. Walleik, S. O.; Bjornsson, R.; Kvaran, A.; Jonsdottir, S.; Girichev, G. V.; Giricheva, N. I.; Hassler, K.; Arnason, I. Conformational properties of 1-fluoro-1-methyl-silacyclohexane and 1-methyl-1-trifluoromethyl-1-silacyclohexane: Gas electron diffraction, low-temperature NMR, temperature-dependent Raman spectroscopy, and quantum chemical calculations *J. Mol. Struct.* **2010**, *978*, 209–219. e. See also Ref. 4a.
- <sup>9</sup> The single point energy calculations do not contain vibrational frequency calculations and hence do not contain thermal corrections to G°. Yet, the thermal correction provided by the original geometry optimization of each compound may be used to convert the single-point values to values of G°.
- <sup>10</sup> Cramer, C. J.; Truhlar, D. G. Quantum Chemical Conformational Analysis of 1,2-Ethandiol: Correlation and Solvation Effects on the Tendency to Form Internal Hydrogen Bonds in the Gas Phase and in Aqueous Solution. *J. Am. Chem. Soc.* **1994**, *116*, 3892–3900.
- <sup>11</sup> Neuenschwander, U.; Hermans, I. The Conformations of Cyclooctene: Consequences for Epoxidation Chemistry. *J. Org. Chem.* **2011**, *76*, 10236–1040.

- 12 Cramer, C. J.; Truhlar, D. G. Quantum Chemical Conformational Analysis of 1,2-Ethanediol: Correlation and Solvation Effects on the Tendency to Form Internal Hydrogen Bonds in the Gas Phase and in Aqueous Solution. *J. Am. Chem. Soc.* **1994**, *116*, 3892–3900.
- 13 Neuenschwander, U.; Hermans, I. The Conformations of Cyclooctene: Consequences for Epoxidation Chemistry. *J. Org. Chem.* **2011**, *76*, 10236–1040.
